# Supplementary material for: Morphological Changes Induced by TKS4 Deficiency Can Be Reversed by EZH2 Inhibition in Colorectal Carcinoma Cells
Source: Biomolecules. 2024 Apr 5;14(4):445. doi: 10.3390/biom14040445 (PMC11047920; doi:10.3390/biom14040445)
Supplement: Supplementary file 1 [file biomolecules-14-00445-s001.zip › Supplementary Table S1.xlsx]

## Sheet: A (Markers)
No.	Markers	gene	Description	WT	WT-T/WT	KO/WT	KO-T/KO	KO-T/WT		WTT/WT	KO/WT	KOT/KO	KOT/WT		Change upon Tks4 deletion	State	Restored upon EZH2 inhibition	Note	Percentage of effect
1	Proliferation	MKI67	Marker Of Proliferation Ki-67	645785	451779	468135	498131	482540		-30.0419	-27.5092	-22.8643	-25.2785		Yes	Decrease	No				76.3158				1	0	1
2	Proliferation	CCNA2	Cyclin A2	211159	186642	143328	166456	161224		-11.6107	-32.1232	-21.1703	-23.6481		Yes	Decrease	No				21.0526				1	0	1
3	Proliferation	CCNB1	Cyclin B1	292623	340921	234509	348831	337905		16.5052	-19.8597	19.2083	15.4745		Yes	Decrease	Yes								1	1	1
4	Proliferation	CCNB2	Cyclin B2	70813.9	62547.5	60038.7	66938.4	64841.9		-11.6734	-15.2162	-5.4728	-8.43337		Yes	Decrease	No						TKS4	EZH2	1	0	1
5	Proliferation	CCNB3	Cyclin B3	3443.23	7632.73	2685.84	4815.71	4665.84		121.674	-21.9965	39.8602	35.5076		Yes	Decrease	Yes					EMT	0.833333	0.583333	1	1	1
6	Proliferation	CCNC	Cyclin C	117285	60566.1	93360.8	58599	56763.7		-48.3599	-20.3983	-50.0371	-51.6019		Yes	Decrease	No					Invasion	0.857143	0.742857	1	0	1
7	Proliferation	CCND1	Cyclin D1	657284	478698	548244	503384	487850		-27.1703	-16.5895	-23.4145	-25.7779		Yes	Decrease	No					Proliferation	0.763158	0.210526	1	0	1
8	Proliferation	CCNE1	Cyclin E1	43229.1	60385.3	32511.1	45887.5	44450.9		39.6867	-24.7935	6.14956	2.82634		Yes	Decrease	No					Senescence	0.666667	0.166667	1	0	1
9	Proliferation	CCNE2	Cyclin E2	38850.9	37440	26676.4	31048.9	30075		-3.63158	-31.3365	-20.0819	-22.5887		Yes	Decrease	No					Splicing	0.604651	0.0697674	1	0	1
10	Proliferation	CCNF	Cyclin F	117326	111332	96366.2	107564	104218		-5.10884	-17.8646	-8.32041	-11.1723		Yes	Decrease	No		0.763158						1	0	1
11	Proliferation	CCNH	Cyclin H	61518.3	64076.5	55635.7	73381.6	71099.1		4.15844	-9.56236	19.2842	15.5739		No	Decrease	Yes		of the Proliferation markers						0	1	1
12	Proliferation	CCNI2	Cyclin I Family Member 2	312.442	417.61	225.002	295.585	286.556		33.66	-27.986	-5.39524	-8.28506		Yes	Decrease	No	Low FPKM	are regulated by Tks4						1	0	1
13	Proliferation	CCNJ	Cyclin J	27387.4	35454.1	23477	28321.2	27446.8		29.4541	-14.2781	3.4096	0.216888		No	Decrease	No								0	0	1
14	Proliferation	CCNK	Cyclin K	64306.4	59140	48570.7	54672.5	52968.2		-8.03404	-24.4699	-14.9812	-17.6315		Yes	Decrease	No								1	0	1
15	Proliferation	CCNQ	Cyclin Q	22852.5	19098.4	17406.3	20502.4	19859.9		-16.4275	-23.832	-10.2838	-13.0953		Yes	Decrease	No								1	0	1
16	Proliferation	CDK1	Cyclin Dependent Kinase 1	183234	187924	153250	176584	171051		2.55957	-16.3638	-3.62924	-6.64888		Yes	Decrease	No								1	0	1
17	Proliferation	CDK2	Cyclin Dependent Kinase 2	113480	136255	100498	122186	118385		20.0696	-11.4399	7.67184	4.32235		No	Decrease	No		0.210526						0	0	1
18	Proliferation	CDK4	Cyclin Dependent Kinase 4	167244	217866	161257	238604	231202		30.2684	-3.5798	42.6682	38.2423		No		Yes		of the Proliferation markers						0	1	1
19	Proliferation	CDK6	Cyclin Dependent Kinase 6	402270	343483	220103	256232	248228		-14.6138	-45.2848	-36.3035	-38.2932		Yes	Decrease	No		are regulated by EZH2						1	0	1
20	Proliferation	CDK7	Cyclin Dependent Kinase 7	76459.6	61101.1	64033.7	49494.6	47944.6		-20.0871	-16.2516	-35.267	-37.2942		Yes	Decrease	No								1	0	1
21	Proliferation	CDK8	Cyclin Dependent Kinase 8	34401.3	28119.4	23325.6	17502	16958.5		-18.2606	-32.1956	-49.124	-50.7039		Yes	Decrease	No								1	0	1
22	Proliferation	CCDC25	Coiled-Coil Domain Containing 25	45860.5	45760.6	43932.3	50703.1	49126.7		-0.217835	-4.20449	10.5594	7.12203		No		No								0	0	1
23	Proliferation	CDC25C	Cell Division Cycle 25C	23567.3	23221.1	16028.9	19160.1	18561.3		-1.46898	-31.9867	-18.7005	-21.2413		Yes	Decrease	No								1	0	1
24	Proliferation	MCM10	Minichromosome Maintenance 10 Replication Initiation Factor	107619	110363	73528	96637.2	93611.2		2.54974	-31.6775	-10.2043	-13.0161		Yes	Decrease	No								1	0	1
25	Proliferation	MCM2	Minichromosome Maintenance Complex Component 2	224425	301439	186745	312754	303032		34.3161	-16.7896	39.3579	35.026		Yes	Decrease	Yes								1	1	1
26	Proliferation	MCM3	Minichromosome Maintenance Complex Component 3	321891	369673	262221	329326	319080		14.8442	-18.5373	2.30979	-0.873277		Yes	Decrease	No								1	0	1
27	Proliferation	MCM4	Minichromosome Maintenance Complex Component 4	349764	397511	294809	398833	386410		13.6512	-15.712	14.0292	10.4774		Yes	Decrease	Yes								1	0	1
28	Proliferation	MCM5	Minichromosome Maintenance Complex Component 5	194398	203353	164431	224619	217614		4.60653	-15.4153	15.5459	11.9425		Yes	Decrease	Yes								1	1	1
29	Proliferation	MCM6	Minichromosome Maintenance Complex Component 6	182143	205924	157945	210518	203954		13.0562	-13.2852	15.5784	11.9747		No	Decrease	Yes								0	1	1
30	Proliferation	MCM7	Minichromosome Maintenance Complex Component 7	490657	495679	444305	538181	521388		1.02353	-9.44693	9.68579	6.26323		No		No								0	0	1
31	Proliferation	MCM8	Minichromosome Maintenance Complex Component 8	79218	66655.3	58965.6	62986.2	61023.4		-15.8584	-25.5654	-20.49	-22.9678		Yes	Decrease	No								1	0	1
32	Proliferation	MCM9	Minichromosome Maintenance Complex Component 9	27323.2	17571.5	24190.7	15551.5	15067.8		-35.6902	-11.4646	-43.0832	-44.8535		No	Decrease	No								0	0	1
33	Proliferation	MCMDC2	Minichromosome Maintenance Domain Containing 2	242.989	140.837	150.457	153.856	149.072		-42.0398	-38.0807	-36.6819	-38.6507		Yes	Decrease	No	Low FPKM							1	0	1
1	Proliferation Inhibitor	CDKN1A	Cyclin Dependent Kinase Inhibitor 1A	189857	253643	293767	316502	306761		33.5969	54.7307	66.7055	61.5748		Yes	Increase	No								1	0	1
2	Proliferation Inhibitor	CDKN1B	Cyclin Dependent Kinase Inhibitor 1B	36869.6	39537.7	41196.4	35683.8	34577.9		7.23659	11.7354	-3.2162	-6.21569		No	Increase	No								0	0	1
3	Proliferation Inhibitor	CDKN1C	Cyclin Dependent Kinase Inhibitor 1C	10039.9	11076.5	13784.5	11701.1	11340.5		10.3248	37.2972	16.546	12.9543		Yes	Increase	No								1	0	1
4	Proliferation Inhibitor	CDKN2A	Cyclin Dependent Kinase Inhibitor 2A	23597.1	40980.8	44975.2	69405.3	67285.4		73.6688	90.5963	194.126	185.143		Yes	Increase	No								1	0	1
5	Proliferation Inhibitor	CDKN2B	Cyclin Dependent Kinase Inhibitor 2B	6039.88	3427.15	24325	16951.7	16433.7		-43.258	302.74	180.663	172.087		Yes	Increase	Yes								1	1	1
																									29	8	38
1	Invasion	PLAU	Plasminogen Activator, Urokinase	37473.9	39814.3	106081	46713.4	45267.6		6.24541	183.08	24.6558	20.7977		Yes	Increase	Yes				85.7143				1	1	1
2	Invasion	LAMA5	Laminin-5	154842	107277	270280	148087	143573		-30.7184	74.5521	-4.36251	-7.27774		Yes	Increase	Yes				74.2857				1	1	1
3	Invasion	LAMA3	Laminin-3	6090.23	5248.1	9154.18	4784.82	4636.44		-13.8276	50.3093	-21.4345	-23.8709		Yes	Increase	Yes								1	1	1
4	Invasion	COL1A1	Collagen type I member A1	14444.8	7610.73	19555.6	5981.83	5799.95		-47.3116	35.3816	-58.5884	-59.8475		Yes	Increase	Yes								1	1	1
5	Invasion	COL4A3	Collagen type IV member A3	4055.18	1507.99	5849.13	1194.47	1157.81		-62.8132	44.2385	-70.5446	-71.4486		Yes	Increase	Yes								1	1	1
6	Invasion	COL4A4	Collagen type IV member A4	12674	4928.05	13696.4	6028.64	5842.5		-61.1169	8.06691	-52.433	-53.9017		No		Yes								0	1	1
7	Invasion	COL4A5	Collagen type IV member A5	22541	19471.4	28147.2	16133.7	15638		-13.6179	24.8711	-28.4251	-30.6242		Yes	Increase	Yes								1	1	1
8	Invasion	COL5A1	Collagen type V member A1	281.198	169.289	367.416	302.227	292.783		-39.7972	30.661	7.47836	4.11987		Yes	Increase	No	Low FPKM							1	0	1
9	Invasion	COL6A1	Collagen type VI member A1	65828.1	31492.3	96451	60826.6	58960		-52.1598	46.5195	-7.59782	-10.4334		Yes	Increase	Yes								1	1	1
10	Invasion	COL6A2	Collagen type VI member A2	56419.1	25469	83719.7	38975.4	37780.3		-54.8575	48.3889	-30.9181	-33.0363		Yes	Increase	Yes		0.857143						1	1	1
11	Invasion	CTSA	Cathepsin A	48541.6	40229.9	53807	53599.1	51936.3		-17.1228	10.8472	10.4189	6.99338		No	Increase	No		of the invasion markers						0	0	1
12	Invasion	CTSB	Cathepsin B	126235	158610	252158	249590	241947		25.6466	99.7528	97.7185	91.664		Yes	Increase	No		areregulated by Tks4						1	0	1
13	Invasion	CTSD	Cathepsin D	67775.6	57237.2	73409.9	67313.5	65251.1		-15.549	8.31317	-0.681809	-3.72479		No		No								0	0	1
14	Invasion	CTSE	Cathepsin E	57.7122	355.68	127.368	307.711	298.143		516.299	120.695	433.182	416.603		Yes	Increase	No	Low FPKM							1	0	1
15	Invasion	SERPINE1	Serpin Family E Member 1	12400	29956.9	78921.7	55421.1	53725.9		141.588	536.465	346.944	333.273		Yes	Increase	Yes								1	1	1
16	Invasion	MMP7	Matrix Metallopeptidase 7	274.233	138	653.313	445.115	431.132		-49.6778	138.233	62.3127	57.2138		Yes	Increase	Yes	Low FPKM							1	1	1
17	Invasion	MMP9	Matrix Metallopeptidase 9	246.669	271.745	547.358	291.26	282.061		10.1658	121.9	18.0773	14.348		Yes	Increase	Yes	Low FPKM	0.742857						1	1	1
18	Invasion	MMP14	Matrix Metallopeptidase 14	12336.1	14860.7	2149.45	2120.77	2055.87		20.4651	-82.5759	-82.8084	-83.3345		Yes	Decrease	No		of the invasion markers						1	0	1
19	Invasion	MMP15	Matrix Metallopeptidase 15	48771.6	51596.7	74714.2	63446.7	61497.7		5.79251	53.192	30.0894	26.0933		Yes	Increase	Yes		are regulated by EZH2						1	1	1
20	Invasion	MMP17	Matrix Metallopeptidase 17	6950.74	4987.71	9505.21	4302.16	4169.68		-28.242	36.7511	-38.105	-40.011		Yes	Increase	Yes								1	1	1
21	Invasion	ITGA10	Integrins A member 10	1033.65	1012.89	1680.01	1309.94	1269.36		-2.00842	62.5318	26.7296	22.8037		Yes	Increase	Yes								1	1	1
22	Invasion	ITGA2	Integrins A member 2	82460.2	89951.4	100447	97978.8	94954.8		9.08463	21.8127	18.8195	15.1523		Yes	Increase	Yes								1	1	1
23	Invasion	ITGA2B	Integrins A member 2B	1711.47	1281.8	2444.28	1296.65	1256.9		-25.1053	42.8176	-24.2376	-26.5602		Yes	Increase	Yes								1	1	1
24	Invasion	ITGA3	Integrins A member 3	214470	159543	400850	208217	201825		-25.6106	86.9026	-2.91556	-5.89593		Yes	Increase	Yes								1	1	1
25	Invasion	ITGA5	Integrins A member 5	51049.2	65604.8	60687.5	62819.3	60879.8		28.5129	18.8804	23.0564	19.2571		Yes	Increase	No								1	0	1
26	Invasion	ITGA6	Integrins A member 6	197943	155695	278446	184703	178963		-21.3435	40.6698	-6.68879	-9.58862		Yes	Increase	Yes								1	1	1
27	Invasion	ITGA7	Integrins A member 7	6000.08	5788.6	10643.9	7601.79	7369.18		-3.52462	77.396	26.6948	22.818		Yes	Increase	Yes								1	1	1
28	Invasion	ITGA9	Integrins A member 9	2079.83	1160.9	3174.1	1938.64	1878.1		-44.1829	52.6134	-6.78854	-9.69935		Yes	Increase	Yes								1	1	1
29	Invasion	ITGAV	Integrins A member V	90784.3	69031.6	91285.9	74502.2	72200.5		-23.9609	0.552518	-17.9349	-20.4703		No		Yes								0	1	1
30	Invasion	ITGAX	Integrins A member X	704.288	396.898	2451.64	301.069	291.917		-43.6455	248.102	-57.252	-58.5515		Yes	Increase	Yes	Low FPKM							1	1	1
31	Invasion	ITGB1	Integrins B member 1	305873	297170	347943	299983	290691		-2.8453	13.7541	-1.92564	-4.9635		No	Increase	Yes								0	1	1
32	Invasion	ITGB4	Integrins B member 4	208981	114283	535225	202392	196222		-45.3142	156.112	-3.15292	-6.10534		Yes	Increase	Yes								1	1	1
33	Invasion	ITGB5	Integrins B member 5	50048.6	80681.3	73276.8	96343.2	93395.4		61.2059	46.4113	92.4993	86.6094		Yes	Increase	No								1	0	1
34	Invasion	ITGB6	Integrins B member 6	105.872	358.517	268.757	495.628	480.246		238.632	153.851	368.139	353.61		Yes	Increase	No	Low FPKM							1	0	1
35	Invasion	ITGB7	Integrins B member 7	310.253	245.289	586.44	221.978	215.133		-20.939	89.0199	-28.4526	-30.6588		Yes	Increase	Yes	Low FPKM							1	1	1
36	Invasion	ITGB8	Integrins B member 8	30237.6	13361.7	37312.7	15645.6	15160.9		-55.811	23.3984	-48.2578	-49.8608		Yes	Increase	Yes								1	1	1
																									30	26	35
1	EMT (Epithelial)	CDH1	E-cadherin	50794.1	51248.5	26174.5	32028.1	31042.9		0.894592	-48.4694	-36.9452	-38.8848		Yes	Decrease	Yes			Epith.	83.3333				1	1	1	1	1	1	1	1	1
2	EMT (Epithelial)	KRT7	Cytokeratin 7	3879.85	6486.2	1093.1	4464.36	4328.78		67.1766	-71.8262	15.0653	11.5708		Yes	Decrease	Yes		0.833333		58.3333				1	1	1	1	1	1	1	1	1
3	EMT (Epithelial)	CLDN1	Claudin	93.7326	95.4838	93.3483	114.31	110.68		1.86829	-0.409996	21.9533	18.0806		No		No	Low FPKM	of the EMT markers	TKS4	83.3333			83.3333	0	0	1	0	0	1	0	0	1
4	EMT (Epithelial)	OCLN	Occludin	39738.1	39693.5	31960.7	23052.9	22336.7		-0.112235	-19.5716	-41.9879	-43.7902		Yes	Decrease	No		are regulated by Tks4	83.3333	50			66.6667	1	0	1	1	0	1	1	0	1
5	EMT (Epithelial)	TJP1	Tight Junction Protein 1	178110	159693	147156	132668	158556		-10.3402	-17.3791	-9.84533	-10.9786		Yes	Decrease	Yes			EZH2					1	1	1	1	1	1	1	1	1
6	EMT (Epithelial)	TJP2	Tight Junction Protein 2	31446.8	27074.5	25981.4	22785.3	22079.9		-13.9038	-17.3798	-12.3015	-29.7865		Yes	Decrease	No			50					1	0	1	1	0	1	1	0	1
7	EMT (Mesenchymal)	FN1	Fibronectin 1	13149.8	10988.5	17775	16183.6	15684.2		-16.436	35.1732	23.0711	19.2733		Yes	Increase	Yes			Mese.					1	1	1	1	1	1	1	1	1
8	EMT (Mesenchymal)	VIM	Vimentin	18542.8	15396.8	55151.9	40378.8	39111.8		-16.9662	197.43	117.76	110.927		Yes	Increase	Yes		0.583333						1	1	1	1	1	1	1	1	1
9	EMT (Mesenchymal)	SNAI1	Snail	11933.3	9060.56	12276.4	9304.01	9018.83		-24.0733	2.87515	-22.0332	-24.423		No		Yes	Low FPKM	of the EMT markers	TKS4					0	1	1	0	1	1	0	1	1
10	EMT (Mesenchymal)	SNAI2	Slug	110.648	82.5164	226.088	125.278	121.402		-25.4244	104.331	13.2221	9.71911		Yes	Increase	Yes	Low FPKM	are regulated by EZH2	83.3333					1	1	1	1	1	1	1	1	1
11	EMT (Mesenchymal)	ZEB1	Zeb1	6548.75	7285.72	9186.14	10406.5	10081.4		11.2536	40.2732	58.9082	53.9439		Yes	Increase	No			EZH2					1	0	1	1	0	1	1	0	1
12	EMT (Mesenchymal)	TWIST1	Twist1	1933.96	1832.46	849.358	1746.4	1691.5		-5.2483	-56.0819	-9.69824	-12.537		Yes	Decrease	No			66.6667					1	0	1	1	0	1	1	0	1
																									10	7	12	5	3	6	5	4	6
1	Senescence Promoting	TP53	Tumor Protein P53	66715.9	56196.6	86545	75137.6	72815.4		-15.7673	29.7217	12.6232	9.1425		Yes	Increase	No			Senescence Promoting	66.6667				1	0	1	1	0	1	1	0	1
2	Senescence Promoting	CDKN2A	p16	23597.1	40980.8	44975.2	69405.3	67285.4		73.6688	90.5963	194.126	185.143		Yes	Increase	No				16.6667				1	0	1	1	0	1	1	0	1
3	Senescence Promoting	CDKN2B	p15	6039.88	3427.15	24325	16951.7	16433.7		-43.258	302.74	180.663	172.087		Yes	Increase	Yes				110.927				1	1	1	1	1	1	1	1	1
4	Senescence Promoting	CDKN1A	p21	189857	253643	293767	316502	306761		33.5969	54.7307	66.7055	61.5748		Yes	Increase	No		0.666667		70			62.5	1	0	1	1	0	1	1	0	1
5	Senescence Promoting	CDKN1B	p27	36869.6	39537.7	41196.4	35683.8	34577.9		7.23659	11.7354	-3.2162	-6.21569		No	Increase	No		of the Senescence markers		20			12.5	0	0	1	0	0	1	0	0	1
6	Senescence Promoting	CDKN1C	p57	10039.9	11076.5	13784.5	11701.1	11340.5		10.3248	37.2972	16.546	12.9543		Yes	Increase	Yes		are regulated by Tks4						1	1	1	1	1	1	1	1	1
7	Senescence Promoting	CDKN2A	p19ARF	23597.1	40980.8	44975.2	69405.3	67285.4		73.6688	90.5963	194.126	185.143		Yes	Increase	No			TKS4					1	0	1	1	0	1	1	0	1
8	Senescence Promoting	MAPK14	p38MAPK	60297.5	61664.9	73270.5	68891.9	66760.2		2.26776	21.515	14.2533	10.718		Yes	Increase	No			70					1	0	1	1	0	1	1	0	1
9	Senescence Promoting	PDP2	Pyruvate Dehydrogenase Phosphatase Catalytic Subunit 2	40328.9	46948.7	45680.3	40833.7	39571.8		16.4145	13.2694	1.25171	-1.87731		No	Increase	No		0.166667	EZH2					0	0	1	0	0	1	0	0	1
10	Senescence Promoting	PDHA1	Pyruvate Dehydrogenase E1 Subunit Alpha 1	50711.9	52086.4	55659.4	60041.1	58178.6		2.71041	9.75609	18.3965	14.7238		No	Increase	No		of the Senescence markers	20					0	0	1	0	0	1	0	0	1
11	Senescence Inhibiting	CDK1	Cyclin Dependent Kinase 1	183234	187924	153250	176584	171051		2.55957	-16.3638	-3.62924	-6.64888		Yes	Decrease	No		are regulated by EZH2	Senescence Inhibiting					1	0	1	1	0	1	1	0	1
12	Senescence Inhibiting	CDK2	Cyclin Dependent Kinase 2	113480	136255	100498	122186	118385		20.0696	-11.4399	7.67184	4.32235		No	Decrease	No								0	0	1	0	0	1	0	0	1
13	Senescence Inhibiting	CDK4	Cyclin Dependent Kinase 4	167244	217866	161257	238604	231202		30.2684	-3.5798	42.6682	38.2423		No		No								0	0	1	0	0	1	0	0	1
14	Senescence Inhibiting	CDK6	Cyclin Dependent Kinase 6	402270	343483	220103	256232	248228		-14.6138	-45.2848	-36.3035	-38.2932		Yes	Decrease	No								1	0	1	1	0	1	1	0	1
15	Senescence Inhibiting	CCND1	Cyclin D1	657284	478698	648244	503384	487850		-27.1703	-1.37536	-23.4145	-25.7779		No		No			TKS4					0	0	1	0	0	1	0	0	1
16	Senescence Inhibiting	CCNE1	Cyclin E1	43229.1	60385.3	32511.1	45887.5	44450.9		39.6867	-24.7935	6.14956	2.82634		Yes	Decrease	No			62.5					1	0	1	1	0	1	1	0	1
17	Senescence Inhibiting	CDC25C	Cell Division Cycle 25C	23567.3	23221.1	16028.9	19160.1	18561.3		-1.46898	-31.9867	-18.7005	-21.2413		Yes	Decrease	No			EZH2					1	0	1	1	0	1	1	0	1
18	Senescence Inhibiting	MCM2	Minichromosome Maintenance Complex Component 2	224425	301439	186745	312754	303032		34.3161	-16.7896	39.3579	35.026		Yes	Decrease	Yes			12.5					1	1	1	1	1	1	1	1	1
																									12	3	18	7	2	10	5	1	8
1	Splicing Factor	SF1	Splicing Factor 1	199682	145723	195838	174227	168821		-27.0225	-1.92506	-12.7478	-15.4551		No		No			Splicing Factor	60.4651				0	0	1	0	0	1	0	0	1
2	Splicing Factor	SF3A1	Splicing Factor 3a Subunit 1	144368	132653	127152	145038	140541		-8.11468	-11.9251	0.464092	-2.65086		No	Decrease	No				6.97674				1	0	1	1	0	1	1	0	1
3	Splicing Factor	SF3A3	Splicing Factor 3a Subunit 3	138632	140162	116820	162438	157362		1.10364	-15.7337	17.1721	13.5106		Yes	Decrease	No				54.5455			62.5	1	0	1	1	0	1	1	0	1
4	Splicing Factor	SF3B1	Splicing Factor 3b Subunit 1	544832	579782	531764	587451	569138		6.41482	-2.39854	7.82241	4.46119		No		No		0.604651		9.09091			6.25	0	0	1	0	0	1	0	0	1
5	Splicing Factor	SF3B2	Splicing Factor 3b Subunit 2	184639	152393	167026	173899	168480		-17.4643	-9.53915	-5.81676	-8.75167		No	Decrease	No		of the Splicing markers						1	0	1	1	0	1	1	0	1
6	Splicing Factor	SF3B3	Splicing Factor 3b Subunit 3	339245	365396	322742	330995	320719		7.70859	-4.86463	-2.43187	-5.46095		No		No		are regulated by Tks4						0	0	1	0	0	1	0	0	1
7	Splicing Factor	SF3B4	Splicing Factor 3b Subunit 4	54723.5	44420.1	41058.4	47580.4	46098.6		-18.8281	-24.9712	-13.0531	-15.7609		Yes	Decrease	No								1	0	1	1	0	1	1	0	1
8	Splicing Factor	SF3B5	Splicing Factor 3b Subunit 5	74358.9	54120.9	68468.9	63840.4	61844.9		-27.2166	-7.92104	-14.1456	-16.8292		No		No			TKS4					0	0	1	0	0	1	0	0	1
9	Splicing Factor	SF3B6	Splicing Factor 3b Subunit 6	95166.9	121363	79520.1	122534	118691		27.5265	-16.4414	28.757	24.7188		Yes	Decrease	Yes		0.0697674	54.5455					1	1	1	1	1	1	1	1	1
10	Splicing Factor	SFPQ	Splicing Factor Proline And Glutamine Rich	424917	366069	372787	373936	362301		-13.8493	-12.2683	-11.9979	-14.7361		No	Decrease	No		of the Splicing markers	EZH2					1	0	1	1	0	1	1	0	1
11	Splicing Factor	SFSWAP	Splicing Factor SWAP	49598.7	42476	50424	49589.9	48052.4		-14.3607	1.66395	-0.0177424	-3.11762		No		No		are regulated by EZH2	9.09091					0	0	1	0	0	1	0	0	1
12	Splicing	SRSF1	Serine And Arginine Rich Splicing Factor 1	738458	681346	671840	669985	649058		-7.73395	-9.02123	-9.27243	-12.1063		No		No			Splicing					0	0	1	0	0	1	0	0	1
13	Splicing	SRSF3	Serine And Arginine Rich Splicing Factor 3	350613	432662	319771	422117	408959		23.4016	-8.79659	20.394	16.6411		No		Yes								0	1	1	0	1	1	0	1	1
14	Splicing	SRSF4	Serine And Arginine Rich Splicing Factor 4	44451.6	48529.2	43594.9	54333.5	52646.7		9.17312	-1.92726	22.2307	18.436		No		No								0	0	1	0	0	1	0	0	1
15	Splicing	SRSF5	Serine And Arginine Rich Splicing Factor 5	103881	102532	120519	104711	101474		-1.2986	16.0164	0.798991	-2.31707		Yes	Increase	No								1	0	1	1	0	1	1	0	1
16	Splicing	SRSF6	Serine And Arginine Rich Splicing Factor 6	407990	445814	373344	401288	388840		9.27082	-8.49187	-1.64269	-4.69374		No		No								0	0	1	0	0	1	0	0	1
17	Splicing	SRSF7	Serine And Arginine Rich Splicing Factor 7	172142	155210	153801	154331	149509		-9.83607	-10.6546	-10.3467	-13.1479		No	Decrease	No								1	0	1	1	0	1	1	0	1
18	Splicing	SRSF8	Serine And Arginine Rich Splicing Factor 8	44156	65229.1	53740.2	69322.6	67178		47.7242	21.7053	56.9947	52.1379		Yes	Increase	No								1	0	1	1	0	1	1	0	1
19	Splicing	SRSF9	Serine And Arginine Rich Splicing Factor 9	118898	150797	134479	161523	156514		26.8289	13.1045	35.8501	31.6372		Yes	Increase	No			TKS4					1	0	1	1	0	1	1	0	1
20	Splicing	SRSF10	Serine And Arginine Rich Splicing Factor 10	241466	212645	202054	202759	196423		-11.9358	-16.322	-16.03	-18.654		Yes	Decrease	No			62.5					1	0	1	1	0	1	1	0	1
21	Splicing	SRSF11	Serine And Arginine Rich Splicing Factor 11	183828	144397	174667	152035	147305		-21.4499	-4.98346	-17.295	-19.868		No		No			EZH2					0	0	1	0	0	1	0	0	1
22	Splicing	HNRNPA0	Heterogeneous Nuclear Ribonucleoprotein	113528	144767	123697	152170	147494		27.5166	8.95726	34.0374	29.9186		No		No			6.25					0	0	1	0	0	1	0	0	1
23	Splicing	HNRNPA1	Heterogeneous Nuclear Ribonucleoprotein	598809	514407	658016	560911	543567		-14.095	9.88746	-6.3289	-9.22531		No	Increase	No								1	0	1	1	0	1	1	0	1
24	Splicing	HNRNPA2B1	Heterogeneous Nuclear Ribonucleoprotein	572501	342257	512617	382253	370377		-40.2172	-10.4601	-33.231	-35.3054		No	Decrease	No								1	0	1	1	0	1	1	0	1
25	Splicing	HNRNPA3,MIR4444-1	Heterogeneous Nuclear Ribonucleoprotein	346344	262574	317384	283272	274424		-24.1869	-8.36163	-18.2108	-20.7655		No		No								0	0	1	0	0	1	0	0	1
26	Splicing	HNRNPAB	Heterogeneous Nuclear Ribonucleoprotein	191054	192889	168009	212645	206038		0.960461	-12.062	11.301	7.84281		No	Decrease	No								1	0	1	1	0	1	1	0	1
27	Splicing	HNRNPC	Heterogeneous Nuclear Ribonucleoprotein	646277	770074	630020	854325	827731		19.1554	-2.51548	32.1918	28.0768		No		Yes								0	0	1	0	0	1	0	0	1
28	Splicing	HNRNPD	Heterogeneous Nuclear Ribonucleoprotein	158798	111314	94759.7	92481.4	89601.5		-29.9021	-40.3269	-41.7616	-43.5752		Yes	Decrease	No								1	0	1	1	0	1	1	0	1
29	Splicing	HNRNPDL	Heterogeneous Nuclear Ribonucleoprotein	194130	213413	172138	204462	198085		9.93303	-11.3285	5.32221	2.03729		No	Decrease	No								1	0	1	1	0	1	1	0	1
30	Splicing	HNRNPF	Heterogeneous Nuclear Ribonucleoprotein	303826	383927	283751	396208	383946		26.3641	-6.6074	30.4062	26.3704		No		Yes								0	1	1	0	1	1	0	1	1
31	Splicing	HNRNPH1	Heterogeneous Nuclear Ribonucleoprotein	234634	140429	220365	138897	134618		-40.1498	-6.08139	-40.8027	-42.6264		No		No								0	0	1	0	0	1	0	0	1
32	Splicing	HNRNPH2	Heterogeneous Nuclear Ribonucleoprotein	352062	347429	294917	333857	323328		-1.31596	-16.2315	-5.17096	-8.16163		Yes	Decrease	No								1	0	1	1	0	1	1	0	1
33	Splicing	HNRNPH3	Heterogeneous Nuclear Ribonucleoprotein	61932.2	65233.6	50739.9	56468.9	54719.8		5.33067	-18.0719	-8.82142	-11.6456		Yes	Decrease	No								1	0	1	1	0	1	1	0	1
34	Splicing	HNRNPK	Heterogeneous Nuclear Ribonucleoprotein	631986	622933	552275	631571	611837		-1.43247	-12.6128	-0.065666	-3.1882		No	Decrease	No								1	0	1	1	0	1	1	0	1
35	Splicing	HNRNPL	Heterogeneous Nuclear Ribonucleoprotein	243906	288531	258818	305337	295887		18.296	6.11383	25.1863	21.3119		No		No								0	0	1	0	0	1	0	0	1
36	Splicing	HNRNPLL	Heterogeneous Nuclear Ribonucleoprotein	58369	59538	47993.6	55869.2	54132.7		2.00278	-17.7755	-4.28275	-7.25779		Yes	Decrease	No								1	0	1	1	0	1	1	0	1
37	Splicing	HNRNPM	Heterogeneous Nuclear Ribonucleoprotein	180430	158553	162277	182643	176996		-12.1249	-10.061	1.22651	-1.90323		No	Decrease	No								1	0	1	1	0	1	1	0	1
38	Splicing	HNRNPR	Heterogeneous Nuclear Ribonucleoprotein	168935	163320	162187	162152	157109		-3.32376	-3.99444	-4.01515	-7.00033		No		No								0	0	1	0	0	1	0	0	1
39	Splicing	HNRNPU	Heterogeneous Nuclear Ribonucleoprotein	558153	483680	486560	493803	478390		-13.3428	-12.8268	-11.5291	-14.2905		No	Decrease	No								1	0	1	1	0	1	1	0	1
40	Splicing	FUS	FUS RNA Binding Protein	145494	67387.7	108219	78517.2	76093.6		-53.6835	-25.6196	-46.0341	-47.6998		Yes	Decrease	No								1	0	1	1	0	1	1	0	1
41	Splicing	CCAR1	Cell Division Cycle And Apoptosis Regulator 1	79161.5	87033.4	60260.8	75446.3	73086.5		9.9441	-23.8761	-4.69319	-7.67419		Yes	Decrease	No								1	0	1	1	0	1	1	0	1
42	Splicing	CCAR2	Cell Division Cycle And Apoptosis Regulator 1	99654.1	108466	114688	136263	132070		8.84249	15.0861	36.736	32.5284		Yes	Increase	No								1	0	1	1	0	1	1	0	1
43	Splicing	WBP4	WW Domain Binding Protein 4	21860.2	22722.1	16517.4	21416.9	20745.4		3.94278	-24.4408	-2.02789	-5.09968		Yes	Decrease	No								1	0	1	1	0	1	1	0	1
																									26	3	43	6	1	11	20	2	32

## Sheet: B (KEGG)
							No	Signaling Pathway	KO (down)	KO-T (down)	KO (up)	KO-T (up)			RNA-seq data used
	Optimized (minus_added)						1	MAPK	11	6	7	12			KO down	KO up	KOT down	KOT up
	Signaling Pathway	KO (down)	KO (up)	KO-T (down)	KO-T (up)		2	ErbB	1	1	3	3			ZNF91	PRKN	MAGEB1	SPX
	MAPK	-11	7	-6	12		3	Ras	13	10	5	8			EXO5	PPP1R1B	ZNF850	HAS2
	ErbB	-1	3	-1	3		4	Rap1	11	5	2	8			TIMP3	IL1RN	ZFP30	TKTL1
	Ras	-13	5	-10	8		5	Wnt	5	5	3	4			SLC40A1	DMRTA1	ICAM1	CLDN2
	Rap1	-11	2	-5	8		6	Notch	0	2	1	2			SMIM22	HAS2	HNF4A	DMRTA1
	Wnt	-5	3	-5	4		7	Hedgehog	2	4	1	1			MGAT4C	TNFRSF8	B3GALT1	C4orf54
	Notch	0	1	-2	2		8	TGF-beta	2	1	4	6			CSRNP3	BST2	ANO5	ADTRP
	Hedgehog	-2	1	-4	1		9	Hippo	4	4	3	5			TUSC3	SLC5A1	MGAT4C	MANSC4
	TGF-beta	-2	4	-1	6		10	VEGF	0	1	2	2			ZNF550	IFFO1	ANKFN1	ABCA6
	Hippo	-4	3	-4	5		11	Apelin	7	7	7	7			SCN9A	GGT5	ZNF493	ABCA9
	VEGF	0	2	-1	2		12	JAK-STAT	8	2	6	7			SCN3A	FILIP1L	CFAP53	PTPRR
	Apelin	-7	7	-7	7		13	NFkB	3	3	5	4			CSMD3	CHRM1	LTA	COL20A1
	JAK-STAT	-8	6	-2	7		14	TNF	3	3	4	3			ZNF432	SUSD4	ITGBL1	CEND1
	NFkB	-3	5	-3	4		15	HIF1	5	3	5	7			SLC12A5	CEACAM20	RAPSN	MAGEA9B
	TNF	-3	4	-3	3		16	FoxO	4	2	3	4			PGBD5	CHRNG	RBBP8NL	DKK4
	HIF1	-5	5	-3	7		17	Calcium	25	11	14	16			RPL17P47	LSP1,MIR7847	OR7D2	OPRD1
	FoxO	-4	3	-2	4		18	Phosphatidylinositol	2	3	0	2			ZNF20	SPDYE2	ZNF80	CCDC80
	Calcium	-25	14	-11	16		19	Phospholipase D	5	2	4	7			ZNF625	NFAM1	MEI1	ALDH3A1
	Phosphatidylinositol	-2	0	-3	2		20	Sphingolipid	0	3	4	2			STXBP6	QPRT,SPN	ZNF550	PNPLA1
	Phospholipase D	-5	4	-2	7		21	cAMP	12	5	8	10			MUC13	PTPRR	GRIN3B	CHRM1
	Sphingolipid	0	4	-3	2		22	cGMP	8	8	7	5			AOAH	GAL3ST2	TAF1L	TNFRSF8
	cAMP	-12	8	-5	10		23	Pi3K-Akt	26	13	9	16			MIP	IDI2	CYRIA	MTTP
	cGMP	-8	7	-8	5		24	AMPK	6	2	2	2			SLC16A2	COLGALT2	VANGL2	ACTN2
	Pi3K-Akt	-26	9	-13	16		25	mTOR	3	1	6	4			MMP13	ADTRP	ZNF426	DCAF8L2
	AMPK	-6	2	-2	2										LCTL	BDKRB1	PIWIL4	SPARC
	mTOR	-3	6	-1	4										RPS4Y1	MANSC4	TIMP3	FRMPD2
															RERG	COL10A1	RNASE1	SMPX
															IRAG2	THBS2	PAH	SLC22A16
															SGCZ	SYNGR4	FAM25A	IFFO1
															PDE6A	PRSS33	PRSS35	COLGALT2
															NTRK2	LY6D	PLA2R1	GSG1
															AKAP14	CNDP1	FAM229A	RNF222
															SOX5	CDH23	C9orf24	RGS4
															ACTL7B	DUSP13	GALNT3	SLC25A47
															OR13A1	DKK3	RUBCNL	DMBT1
															ST8SIA1	A1BG	ZNF419	SEMA3A
															RNU1-149P	AKT3	REELD1	FGD2
															CGB5	CPAMD8	RASEF	KCNQ3
															KCNMB2	CLDN22	RAB40AL	EDN2
															KCNH8	CABYR	FTCD	LRRN3
															HSPB7	NMUR1	CACNA1G	DRC7
															SPRR2D	PTGDS	PYGM	MPIG6B
															FGF7	COL20A1	APBA2	PRKN
															PKHD1	RBMS3	GPBAR1	HLA-DPB1
															RELN	SPX	SLC22A1	SHBG
															OR6P1	NCKAP5	CFAP91	IL1RN
															GPA33	DHRS9	MUC20	BST2
															GPR151	TMEM88	RIMS2	A1BG
															HAO2	ABO	POU2F3	AQP8
															PRB3	CFB	IL32	FLT4
															PRCD	FUT3	C17orf107	SPN
															ZNF521	CLDN2	RPL17P47	QPRT
															JAKMIP2	CLTRN	GFY	COL25A1
															ADAM28	GPM6B	CA9	HHIP
															KRT37	CLPSL2	RNF224	ORM1
															DLX3	ZNF853	SMIM22	FILIP1L
															HRC	PARP10	SLC39A2	CAVIN2
															SCN1A	CCDC183	CHST4	GPR55
															ZPLD1	FGD2	SMIM38	RBMS3
															MMRN1	CLCNKA	CGREF1	CXCL8
															FAM170A	SEMA3A	PKDREJ	COL14A1
															PADI1	TSPAN19	NECTIN3	PDE1C
															NTRK3	RHOXF1	CATSPERZ	GGT5
															KRT34	SERPINE1	UPB1	GPR156
															ERG	DGCR6	NPIPB3	SOX6
															BMP5	CXCL8	C7orf31	FSTL5
															DLC1	DMBT1	CLEC18A	FCGRT
															INHA	THRB	JPH3	GPR15
															VSTM1	KCNQ3	RNF112	ZNF853
															HSD3B2	HK3	PROX2	CCDC85A
															PROX1	ATP4A	PBX1	GGT6
															NPY4R2	SPDYE5	EHF	PGC
															DYDC2	FAM71A	GP6	TEX11
															HCAR2	EFEMP2	FBLN2	SNTB1
															ISLR	RARRES1	TENM3	NCAM1
															RORA	SOX6	MYBPHL	SERPIND1
															TMEM220	GDF7	GNG3	ABCB5
															CPLX4	ZNF404	NRN1L	TMOD4
															ZBTB32	NXF3	RAB34	GRAP2
															ZNF528	TKTL1	ANGPT2	NNAT
															ZNF880	GFRA3	GRIN2A	TRIM22
															ZNF331	HTRA3	SPATA9	PRICKLE2
															ZNF773	SHC2	SLC16A2	AZGP1
															G6PC2	IRGM	GGN	PARP10
															PAK5	SPEM2	RNF148	GALNT15
															KCNJ4	AQP11	ENPP3	LRIT3
															PRR23B	EFCAB13	PLIN1	NUPR1
															C3orf70	LRRD1	XG	SLC12A3
															THEGL	OR2A42	MMP14	TSPAN7
															RNF180	FN3K	DHH	IL1A
															GCM2	HORMAD2	KLHL10	CHRNG
															TCP11	MB	SLC22A14	LRRC34
															PLPPR1	MYRIP	FAM50B	PPEF2
															TEKT2	WNT8B	TACSTD2	TRPC5
															HTR3A	CHAT	SAP25	SPI1
															MARCHF10	AOPEP	YPEL4	JAM2
															RAX2	TRIM71	SLC35G5	TSPYL5
															RASGEF1B	GSG1	IHH	DNAH7
															PRR23D2	LRRN3	YPEL3	GPM6B
															FBP2	ABCA6,ABCA9	TMED6	CEACAM20
															SCCPDH	CDK5R2	PRLHR	ZNF423
															CCKBR	COL25A1	SOX5	PPP1R1B
															SCN2B	LY6K	BEX4	ADAM23
															KLF1	PIANP	CFAP77	KRT81
															ZNF836	GSTA4	LRTM2	KRT17
															PLCL1	SPARC	MEOX1	POU5F1B
															CYTIP	CATSPERG	ERICH4	KCNIP4
															C2CD6	TMOD4	FBN1	SPON1
															FLRT3	NPR1	RASL10B	ALOX15B
															FOXA2	ADGRD1	ARL10	THBS2
															NPY1R	DRC7	PANX2	SUSD4
															ARHGEF35-AS1	LHX3	PKIB	FOXD4L6
															OR2A1	ZAP70	NPIPB5	GSTA4
															EYA1	DNAAF6	TMEM150C	IKZF3
															CALCB	TSPAN7	GPT	LRRC2
															LMNTD1	DEGS2	ADRA1B	ATOH8
															DCN	TPBGL	ANKK1	LONRF2
															C17orf98	LRG1	KRT20	PTGDS
															PNMA8C	SYCP2	MSH6	THRB
															CD93	IGFALS	ACSL5	CCL28
															MYOZ2	OIT3	CYP4F3	CLTRN
															BASP1	TCF21	ONECUT3	CALHM5
															HDGFL1	ABCA4	PCBP3	CXCR4
															SLC13A1	LONRF2	RHBDL1	RUNDC3A
															TRMT9B	LSAMP	TAS2R10	INSC
															TNFRSF14	CACNA1D	PPP1R2B	MTMR7
															IFI44L	ZNF423	AKR7A3	PIGR
															ADGRL4	IL17REL	CDHR5	EBLN1
															SRGN	NIPAL4	SSC5D	CD4
															SFTPA2	UBL4B	SBK2	NEURL3
															CALY	TSHZ2	GNAT1	MACROD2
															DEFB108B	GP5	ZNF432	POU3F2
															UPK2	MYO15A	ANO2	PRSS33
															GPR152	IGFBP4	TAS2R13	RRH
															VSIG2	KISS1	TTYH1	TEX14
															CLEC6A	PPEF2	SULT1A2	DPF3
															SLC39A5	MCHR2	SLC9C1	HKDC1
															LGR5	CCDC181	TSKS	CTSE
															KLRC1	PROM2	LARGE1	AQP11
															SCEL	SPNS3	TM4SF18	VIL1
															TSHR	RAB9B	HYAL1	AOPEP
															SLC8A3	FSCN3	FXYD4	EPGN
															GOLGA6C	GREM1	OSCAR	ANGPTL2
															ODF3L1	IFITM1	RAD21L1	KRT86
															TRPM1	CACNB2	SLC7A9	DQX1
															BCL2L10	CD300C	MYOM1	FAM166A
															OR1F1	FLT4	HEPHL1	FAM107A
															TRK-CTT4-1	FCGRT	RNF225	AFAP1L2
															GNAO1	SNTB1	ZNF280A	ADGRD1
															RCVRN	PNPLA1	ZNF615	LRRC15
															MYH13	SERPINF1	GAS1	LRRK2
															TBC1D3I	GPR37L1	DYNC1I1	ITGA11
															KCNH4	CALHM5	GOLGA8T	TTN
															CELF4	DRD1	OR2D3	CFB
															GZMM	CACNA1E	KRT37	CPA5
															ZNF429	C4B	PEAK3	CCDC73
															ZSCAN5B	ALOX15	RNF183	NDUFA4L2
															CNGA3	TMPRSS13	KSR2	AFF3
															CAV3	STPG4	CABP1	DNAH11
															GADL1	C2	PLD5P1	CLCNKA
															CD80	ATP6V1B1	THBD	NID1
															CXCL13	CLUL1	C4orf19	FOXQ1
															GHR	TSNAXIP1	CABLES2	PRDM12
															SNCB	CDKN2B	H2BU1	S100A1
															SMOC2	NDUFA4L2	MAL2	IDI2
															PRR18	NCAM1	GNG8	C6orf58
															EPO	IL1A	AK7	TNFSF18
															SAMD9L	EYS	CLIC3	NUP210L
															NRCAM	CPXM1	HSPA12B	CDYL2
															IQCA1L	C4orf50	SMIM32	COL8A2
															UNC5D	HES7	B3GAT1	SPAG8
															DNAJC5B	SLC32A1	TGM4	CACNA1E
															CSMD1	TRPC5	TRPV5	CRTAM
															ADRA1A	KLB	DAPK1	IGFBP2
															DUSP26	TMEM132B	CYP4F12	VIM
															ARMCX4	ACCSL	TMEM170B	SMIM6
															HTR2C	PLEKHS1	TEX12	ITGB6
															TCP11X2	WDR97	NANOS3	ASB18
															CAMK1G	FST	NKD2	FER1L6
															MAJIN	PKNOX2	KCNMA1	CYP4A22
															AQP5	GAST	FNDC1	TLX1
															C12orf56	CCDC187	GRK7	SRD5A2
															CCDC169	EVA1A	LHFPL6	DGCR6
															SOHLH2	SNHG28,VSIG8	KRT13	HEY1
															ZG16	LGALS9	DTX1	TRIM55
															CGB1	LYPD1	TBX2	RAB33A
															SCN7A	LEMD1	SHD	DCT
															DUSP15	OAS2	ALOX5	EFCC1
															FOXS1	PDE1C	BFSP1	MAG
															APOL3	FRMD7	GALNT9	C4B
															ZNF662	MYLK3	LIPG	DRD1
															WNT5A	MMP9	C13orf46	SERPINE1
															POU5F1	BEAN1	FA2H	TSPAN19
															FAM71F1	KCNT1	SLC25A34	ZFP69
															VIPR2	EPS8L3	PPP2R3A	MB
															LRRC7	SOX10	GMFG	DLK2
															ITGA8	CPNE5	STX19	DNAAF1
															NRAP	CLEC17A	CCDC92	LEXM
															CRTAM	SLA2	ALPP	LSP1
															LRRC4C	ASIC4	NTN5	GALNT8
															TENM4	HLA-DPB1	SPOCK3	PIANP
															ZAR1L	RPE65	KRTAP5-10	ZNF750
															NGB	MORN5	GPR182	HRH4
															HBZ	OR52B2	HPD	CLDN11
															OR4D1	TTLL13P	GOLGA8R	HK3
															KRTAP2-2	PRSS48	NANOGP8	KCP
															APCDD1	LDB3	TCAP	SLPI
															CTAGE1	GPR156	ZNF521	ANXA10
															ZNF571	FBLIM1	GALR3	BTBD17
															TCF23	STAB1	PGAM2	NEDD9
															WIPF1	PYGO1	KCNT1	CCDC63
															MARCHF4	NOS2	MYO16	ZAR1L
															SCRT2	SPATC1	AOC3	HBA2
															MAP3K7CL	SLC25A18	BACE1	PSG9
															KRTAP19-2	KY	ANKRD22	MGAM2
															CCRL2	BARHL1	CRB2	SP5
															FBXW12	PRDM12	IMPG2	TSPOAP1
															HTR3C	VWF	GRK1	FRMD7
															TIMP4	ERN2	CYP39A1	SLC9A9
															LYZL4	TBX4	MOXD1	CAND2
															ENAM	MEFV	CPLX1	AKT3
															GLRB	FXYD7	SYT3	MAP3K7CL
															GNRHR	PPEF1	CDKL4	KLB
															IL7R	FBLL1	DHRS2	RIMKLB
															FYB1	ACTN2	ETV2	SCIN
															MEIKIN	POU5F1B	DLX3	SYT5
															MUC21	DKK4	KCNE2	COL4A2
															PBOV1	ITGAX	SLC10A6	HSD17B1
															PIK3CG	CLEC18C	DCLK1	CCT6B
															CPA5	SEC14L5	NPIPB13	TNFRSF9
															WNT2	IDUA	EPN3	MYLK3
															DOK2	ORM1	MYPN	CYP2J2
															STAR	F5	SCUBE1	IL7
															CCL27	PTGS1	COL4A1	IFI44
															ZFY	SPDYA	FSTL4	ANKRD45
															DDX3Y	PDZD9	TMEM61	PRSS37
															MAGEB1	RAB33A	TBC1D3D	TCHH
															HES3	ARMH1	SOX15	ADGRL2
															UBE2U	FAM166A	ZNF709	CCDC177
															ADGRL2	SRD5A2	SYN1	C2CD4A
															BRDT	C4orf47	COL4A3	NEUROD1
															CD2	CARD14	PADI1	GRM1
															TDRD10	CFH	DCST1	FSIP2
															BECN2	C2orf73	GRAP	SHC4
															NPPA	LRRC2	FUT6	CABYR
															KLF18	RUNDC3A	CAPN13	IGFL2
															KCNA2	PPP1R3G	PAX5	ROBO4
															C2CD4D	SLC22A18AS	ADRA2A	ASPRV1
															SPRR2E	VGF	SHANK2	CACNB2
															S100A7	SYT5	SPATA12	LHFPL5
															CCDC190	SLC22A18	SPTSSB	TLCD3B
															NPHS2	SCIN	SLC2A1	PLPPR4
															CACNA1S	PRKAA2	NFATC2	TGFB2
															MYBPH	HTR2B	LIN7B	VARS2
															PIGR	DNAAF1	SPATA4	C2orf73
															SLC30A10	AP3B2	HOXC8	LAMB4
															PLPP4	SYCE3	MDGA1	KCNS2
															EBLN1	IL12RB2	NES	LIN28A
															CRTAC1	KCNJ1	KRTDAP	POU4F3
															SORCS1	HKDC1	ADAM8	EFCAB6
															SYT9	NR4A3	ONECUT1	ISM1
															FAM180B	TMEM8B	LDB3	CXCL1
															DEUP1	CNR2	BIN2	TCEA3
															OR10D3	PLPPR4	ZNF773	BICC1
															VSIG10L2	PXDN	C20orf203	CATIP
															KRTAP5-2	CFAP99	MITF	RIMBP3B
															OR56A1	CLVS1	HTRA1	FAM71A
															GDPD4	B3GALT2	RASSF6	INHBE
															CARD16	SLC5A2	PLEKHA6	HCN1
															GALNT8	SPATA1	PRSS27	NRAP
															CLEC4D	ADHFE1	SCN4A	BMPR1B
															PDE1B	JAM2	DCDC2B	EXOC3L1
															CLEC7A	PGM5	FAM228A	WNT2
															ERP27	PRSS56	CCDC170	TFEC
															KRT82	COL13A1	ERVW-1	TSLP
															KCNC2	BCAN	CARD9	MYOM2
															HCAR1	SLPI	C17orf67	PLGLB2
															SLITRK5	SLC27A1	NLRP4	SERHL2
															KLHL1	ACE	SLCO3A1	CCK
															VRTN	PLA2G10	CAMK2N2	EFCAB5
															KLHL33	CA14	KRT15	IGFBP4
															SLC28A2	FOXJ1	PRPH	NCF4
															LIPC	CLCNKB	GNG13	S100P
															PERCC1	AFAP1L2	IL31RA	OTC
															ACSM2A	GALR2	PHTF1	MORN5
															APOBR	ACP3	ZFP14	ACCSL
															SLC12A3	DQX1	TNFRSF19	NKAIN3
															TEPP	COX8C	SERTAD4	GPR119
															CES4A	LDLRAD1	TBC1D3L	SPRY1
															CLEC3A	CREG2	GRB14	COL13A1
															HSD17B2	CCT6B	PLIN4	MGAM
															RGS11	ESYT3	PPFIBP2	HAGHL
															OR1A1	KCNK12	P4HA3	FAM20A
															GLP2R	CTAGE6	FGF8	NECTIN4
															UNC45B	KCP	LRRIQ3	PLPP3
															ABI3	RASD1	CYCSP24	CD300C
															LPO	SERPINA1	RASSF10	TMEM154
															KCNJ2	ZBTB18	GLIPR1L1	SLC38A4
															P2RX1	PDZD2	RERG	PPP1R32
															SLC47A2	CAPS	MTUS2	HLA-DRB1
															GALR1	GRIA4	HAPLN4	CSAG2
															CDH2	TMPRSS4	ATP2B2	LRP1B
															PINLYP	TMC4	RASGEF1B	LY6K
															KLK3	INSC	ZNF300	ADCY5
															ZNF610	CBY3	PRDM8	CYP26A1
															COMP	CYP2D6	KCNK2	NCKAP1L
															CYP2A7	KIF26B	CPN1	ITGAM
															ZNF841	KIF1A	ZNF611	CABP5
															HOXD13	BICC1	IAH1	PLA2G4
															ADAM23	C10orf143	OR4F16	CD38
															MOGAT1	NLRP12	MUC4	ABCA12
															BOLL	COL6A6	CASS4	HTR2B
															IQCA1	CCL28	GALNS	ZFP42
															XKR7	NRN1	TAF15	GRM3
															ADIG	C9orf131	TAFA2	ALOX15
															WFDC13	OPRD1	ZC3H6	WNT8B
															DOK5	CLIP3	HOXB8	UTS2R
															RFPL1	PRKG1	SLC2A7	TMEM163
															MGAT3	TLR5	SGPP2	PLCL2
															MLC1	ARSD	OR10H1	P3H2
															HHLA2	METTL7A	OTOA	VGF
															GAP43	SLCO2A1	GLIPR1L2	OR9A4
															CLDN11	LHFPL5	KIF7	IL17B
															SLC51A	FOXD4L6	ATP10D	ALPK2
															CYP8B1	NPAS4	RNF39	HOXD8
															LRTM1	ZFP3	GCM1	DDIT4L
															FEZF2	NEUROD2	SLC2A12	PKD2L1
															PROK2	PTH2R	HACD1	PXDN
															FGF12	NEURL3	SH3PXD2B	CLUL1
															SPATA18	SYT15	WWC3	TSSK1B
															TMPRSS11E	NPB	CDHR3	KDR
															FGB	KCNK7	ZNF836	C9orf43
															TDO2	MTTP	PLCL1	FGG
															LDB2	ACTA2	KLHL3	PRSS36
															SULT1B1	SYTL5	C1orf210	WDR49
															C4orf54	ALDH3A1	RRAD	NPR3
															GLRA3	RSPH6A	TRIM73	C4orf51
															LRRC14B	PLD4	MAN1C1	CEMP1
															FAM81B	IFIT2	PKDCC	LEFTY1
															PRLR	COL14A1	C9orf153	GLTPD2
															PLCXD3	EIF2S3B	GPR35	FUT3
															FGF10	IHO1	GJB4	NRP1
															GLRA1	GRM2	SLC2A3	CLIC5
															GMCL2	SCX	ZNF137P	FCN3
															SCGB3A1	ROM1	SMCO2	CACNA1S
															MUC22	ATP13A4	MYO10	PCDH15
															GLYATL3	CNTNAP3C	LOC101927668	NAALAD2
															KCNQ5	SKIDA1	NPIPB6	PDE1B
															MEI4	TCEA3	CHADL	DLEU7
															POU3F2	STAT5A	CEL	SLC7A10
															SMLR1	MAP1LC3B2	C15orf62	ABCG8
															TTLL2	PLAU	TIMM17B	PID1
															IP6K3	GOLGA8T	LOC100418997	LSAMP
															TMEM244	CDK15	PLCH2	MCHR2
															NOX3	ZC2HC1B	CALML4	NPC1L1
															IL6	H3C8	ZCWPW2	NPBWR1
															ASB4	DNAH2	FBLN7	IFNE
															CYP3A43	RBBP8NL	DRP2	DNAJC12
															GPR22	ANKRD2	SCNN1A	SLC3A1
															STRA8	ALPK3	BTLA	DCST2
															RSPH10B	LRRTM2	RBP7	FGF21
															NACAD	ABCA3	WNT9A	KRT6A
															TFPI2	CD22	SIMC1	RELB
															MOGAT3	ATP6V1C2	GUCY2D	TMEM140
															GIMAP6	EID2B	ILDR1	RPE65
															DLGAP2	TLL2	ITPR2	ZNF648
															RP1	FAM20A	ERFL	ABCA4
															XKR4	TAGLN3	CNTNAP2	CCN2
															NKAIN3	SLCO5A1	H2BC13	LYG2
															STMN2	ANKRD45	AKAP14	RTN1
															NECAB1	CASTOR1	PROX1	FOXD4L1
															FGL1	TTLL1	F5	ACTL10
															NEFL	SLC38A4	KRTAP5-8	REN
															KLHL38	SPTBN5	MUC6	HPGD
															COL15A1	CNTN1	TSSK4	SEC31B
															OBP2A	ADGRD2	RORA	ZBTB7C
															LRRC19	KCNQ1	NECAB2	CLDN9
															FAM221B	UTS2B	CPSF4L	DHFR2
															ASPN	IL7	CACNG7	APBB3
															SOHLH1	XCL1	RSPH6A	LGALS7B
															FRMPD4	TRIM54	KCNJ4	GNAT2
															GATA1	SHH	VGLL3	SPAG4
															HEPH	GCNT3	THEGL	HES7
															SASH3	LIF	PALM3	MAP2K6
															CXCR3	LCP1	TAF9B	PSTK
															DMRTC1	WDR86	RAG1	EVA1A
															NEXMIF	FOSB	KLF12	GNG11
															POF1B	CATIP	VWCE	ALOX12B
															AJAP1	TMEM178A	MAGEE1	TCF21
															TEX38	ADAMTS10	PINK1	TRABD2B
															PTGFR	ABCC3	EFCAB12	PLCD4
															SPRR4	NAT16	CRAT	LCT
															CADM3	NECTIN4	CLEC2D	WNK3
															CASQ1	CD79B	CYP2C8	OR52H1
															TRAF3IP3	GRIN2C	EIF4E3	VSTM5
															C1orf87	SEMA3B	SERINC2	KLHL33
															TXNIP	TBX2	KRT23	CYP27B1
															NR1I3	CAND2	DACT1	RGPD6
															PDE6C	SPAG4	INPP5A	FAM166B
															TMEM273	PPP1R27	AURKC	ELAPOR1
															GFRA1	SPDYE2B	RASL11B	CORO1A
															C11orf21	BDKRB2	DYRK1B	RAD9B
															SPI1	SYTL1	POU3F1	DMRT1
															FAM181B	PAQR6	SV2A	CCDC28B
															SLN	SIK1	SEC14L5	H3C3
															SMIM35	TMEM229B	SBK3	HLA-DOB
															KRT6A	CXCL2	SCX	PHGDH
															KRT2	CEBPD	ANO7	ODF3B
															KRT4	RBM46	PRR36	IFIT2
															TBX5	SATB1	FXYD3	HYDIN
															HCAR3	LRRC4	BICRA	SPTY2D1OS
															RPGRIP1	AKR1C3	H4-16	FBXL22
															NRXN3	HEY1	PNPLA7	SNHG28
															ISM2	PLGLB1	CEP112	VSIG8
															GABRG3	GALNT14	KCNK9	LRRC26
															CTXND1	ASIC3	FRMPD1	SLC5A2
															NPIPA3	LTBP2	PPP1R13L	BCL11B
															AQP8	EFCAB5	ZNF846	SCRN2
															CETP	SEZ6	SSUH2	GLIS3
															BCO1	SPATA32	TRPC1	KRT80
															ZSCAN10	ATP5MGL	ME3	CNFN
															TRARG1	TLX1	NYNRIN	FAM184B
															PRAC2	NHSL2	CD19	GPNMB
															WFIKKN2	SYPL2	STARD6	FOXD4L5
															GGT6	PKD2L2	RAX2	HAP1
															KRTAP1	CCIN	ALB	CRYBB2
															KRT33A	TRIM22	KRT19	MAML3
															DSG3	SUSD2	HSPB8	CA14
															LGALS14	YIPF7	ASIC3	SLC18A2
															CALR3	PARD3B	LYPD6	MAGIX
															LGALS7	PCDHB1	P2RY6	NRXN2
															PSG11	SMIM6	YBX2	CLCNKB
															PSG9	NTN3	PPDPF	CFHR1
															ZNF418	DIO1	KCNQ1	MORN4
															SAG	ADSS1	IQCM	EMILIN1
															CHST10	CXCL17	SLCO1B3	RHCE
															TMEM163	OPRL1	SLC2A5	RINL
															ABCB11	UBASH3A	KIAA1217	MLIP
															KCNK15	STK31	MOCOS	CDKN2A
															SERPIND1	GPR15	SLC8A2	LYPD1
															LGALS2	TNNT2	DAPK2	TKTL2
															BFSP2	ASB18	MNS1	APOD
															ROPN1	IL9R	SYN2	GDPD4
															DNAJB8	MGMT	FAM214B	ZFP3
															S100P	SP5	HMGN5	ATP4A
															TLR2	ADAMTS13	BTBD16	CDH4
															RXFP1	TREH	PCLO	PTX3
															IGFBP7	ANKRD22	CEP295NL	NRN1
															UNC5C	ASB9	CHST5	KLHL38
															GYPA	KNDC1	FAM81A	NAALADL2
															NNT	ITGB4	CHPT1	PRTG
															C5orf47	CHRND	CCDC136	TP53I3
															SLC6A3	FNDC9	MCF2	PTGDR2
															HAND1	SCNN1D	FBLN5	B3GALT2
															KCNMB1	ATF3	LOC107986372	RGCC
															OR2J2	YPEL1	IFITM10	KIF19
															GUCA1A	CYGB	P2RY4	HLA-DOA
															TMEM151B	EYA4	CRYBG2	CYP19A1
															TREML2	CIART	OTUD7A	MRGPRF
															EPHA7	PRSS36	NLRP14	SATB1
															SLC22A16	ASB2	ZNF133	NOXO1
															ABCB5	SLC24A2	PPL	RIMBP3
															GPR141	SELPLG	CCDC159	FBXL15
															CHRM2	PTAFR	TRIML2	CEACAM1
															LAMB4	PGGHG	PTCH2	ENO3
															OR9A2	CRYBB2	SPDYA	VIPR2
															SDC2	KLHDC7A	TRPV6	NRP2
															FAM90A21P		WAS	CEBPD
															FABP12		TSPAN1	UBA7
															TSPYL5		MUC5B	H2BC1
															SLC28A3		EGFR	DDX25
															OR1L8		GRHL2	PNLDC1
															FAM163B		ZSWIM9	STRA6
															PAGE4		NCOR2	ASNS
															KLHL4		NOX5,SPESP1	CNTN2
															GPR50		ADAMTS6	EPO
															RTL8B		PRTFDC1	TEK
															ZFP30		ADAM12	FOXD4L3
															TM4SF18		KCNJ5	FDXR
															IL32		SYK	RFTN1
															ZNF595		CNOT3	FOXD4
															ANO5		TTLL7	FBLIM1
															B3GALT1		CCM2	VSTM2L
															ZNF850		ZNF83	IL17D
															ICAM1		FAM219A	C11orf86
															FAM50B		TBX1	FST
															DCLK1		LYVE1	CDKN2B
															ANKFN1		PRRG4	JRK
															CLMP		PPP4R4	OR4D1
															CD36		TCF7L1	STAR
															HNF4A		TRIM17	NDNF
															ZNF280A		FOXC2	ANKRD63
															GPC5		PLEKHH2	ZAP70
															GNA15		FLT3LG	C16orf91
															RUBCNL		THSD1	ZNF425
															DSG4		OBSCN	CIDEB
															HYDIN		TC2N	TNNI1
															FZD8		SPIB	H1-6
															CNTNAP2		TEX29	SLC6A20
															CLEC4G		HMGCS1	SLC6A4
															EXTL1		SLC35D3	COPZ2
															APOC1		EHBP1L1	ROM1
															MITF		COL1A1	LRRD1
															SLC2A3		SLC7A2	C1QTNF8
															EHF		ERICH1	SLC1A2
															ERAS		SLC25A42	KCNAB1
															PLA2R1		C1orf116	GGACT
															TEKT5		CLMP	MISP3
															SLFN12		OSGIN1	RSPH9
															NOSTRIN		GPR83	LRG1
															COL6A3			HLA-DMA
															KIF7			MATN4
															GRIN2A			GOLGA6C
															GFY			MEFV
															RLN2			STAT5A
															PXT1			STPG4
															IGFL2			DDX4
															MMP19			NIPAL4
															CATSPERZ			GJB7
															MUC4			RNASEH2C
															MUCL3			LGI4
															ZNF493			KCTD4
															KRT83			MINDY1
															TENM3			GPRC5D
															GAS1			MYADML2
															KLHDC9			PTGS1
															KRT13			RAB7B
															ADRA1B			LCP1
															CYRIA			LAMA2
															ANGPT2			LRRC75A
															KLHL10			LTC4S
															PPP1R36			DDR2
															MEIOSIN			STAG3
															C19orf67			PVRIG
															FGF9			PSMB8
															FGF21			HGD
															SPOCK1			ABHD14B
															GCHFR			TCF23
															OR2D3			SFTA3
															ATOH7			CMYA5
															GNG2			IL23A
															SBK2			C19orf73
															IL2RB			IRF4
															CCDC65			BCAN
															AKNAD1			MEGF11
															STMN4			CBLN3
															C4orf19			HAPLN3
															AMIGO1			ATP12A
															HCK			CCDC87
															PDCL2			IFIT3
															ZNF615			PSMB9
															MMP14			TREH
															C10orf62			CD33
															OR2D2			ZNHIT2
															RHO			INSYN2A
															KRTDAP			CHST2
															SLC10A6			ACVRL1
															GRHL3			AADAC
															ITGBL1			EXOC3L4
															LINGO3			C3orf22
															TXLNB			IGSF1
															MSH6			RUNX2
															GAS2			GALNT14
															SGIP1			NAT14
															B3GAT1			PRKAA2
															TBC1D28			TMEM175
															PKDCC			STX1B
															RIMS2			TLR5
															ABCD2			MAPK15
															IL1R2			MDH1B
															OR2B6			DNAH2
															EDA2R			SAMD15
															MYO1A			C1QTNF4
															SCN2A			SHLD1
															TAT			AGMAT
															SLAMF7			OIT3
															PDCD1			PDE6C
															KIAA1210			DKK3
															COL21A1			TBX5
															DACT1			KCNK12
															CPN1			FBXW12
															ITLN2			TIMP4
															ANKRD1			HTRA3
															NRN1L			IGFBP7
															CHRNE			CLDN22
															BTK			STK31
															CD200			VSNL1
															ALPP			TNFRSF1B
															HIF3A			CARNS1
															NECTIN3			F2RL2
															GNG3			C1orf226
															KCNK2			PI15
															ILDR2			QTRT1
															MMP1			MMP24
															RAD21L1			SLC25A18
															CSTA			TG
															XG			CNTD1
															TIMM17B			PYGO1
															CD96			SAMD13
															LURAP1			GLYCTK
															CUX2			SPATA20
															NPTX1			RAB19
															PPP1R16B			DMC1
															VGLL3
															CD38
															ELN
															MOXD1
															GCK
															UTS2
															GCNT4
															PPP1R1A
															CYP2C8
															SCRT1
															LGALS4
															ME3
															STARD6
															DAPP1
															PRSS37
															MEP1B
															GRM8
															TAS1R2
															ASCL1
															PTX3
															CDC20B
															CALN1
															IAH1
															TULP1
															SLC2A1
															CAPN6
															DZIP1
															HAPLN4
															GNA14
															ARL9
															UBE2L5
															C1QTNF2
															HAVCR2
															ENPP3
															GPR45
															MAGEA2B
															GASK1A
															ADGRE1
															ZNF439
															PLA1A
															OTP
															ZFPM2
															FAM25A
															SNORD
															SNHG14
															PWAR4
															IPW
															DGKI
															LHFPL6
															CCDC170
															KRT7
															KRT39
															ABCB4
															C5AR2
															BEX4
															SPDYE3
															STRA6
															MEIG1
															SUN3
															LONRF3
															CGREF1
															B3GAT2
															ZNF426
															ADGRG7
															ANO2
															PPP1R2B
															PLD5P1
															POU4F3
															CGAS
															CEND1
															TMEM150C
															RSAD2
															SLCO1B1
															NPL
															RHOH
															IRAK3
															XKR9
															AGBL2
															NANOS3
															PKIB
															TMEM217
															GPX2
															TMEM191C
															PNLDC1
															C11orf87
															FAM186A
															CTCFL
															RASGRP3
															LRRC10B
															SERPINC1
															SYCP3
															PKDREJ
															ATP6V0A4
															ARL14
															LIN28A
															ZBED2
															PEG10
															SPP1
															RAB34
															CCDC92B
															TAS1R1
															BSND
															MRC1
															MYADML2
															CCN5
															SIRPB1
															NEFH
															FAM153A
															FGL2
															STPG3
															SLC5A9
															CACNG6
															CALB1
															LRRC66
															DAPK1
															GREB1L
															ENKUR
															DDX25
															ERICH4
															PROCA1
															NPFFR1
															CD52
															LRRC71
															TBX21
															PRKAG3
															KCNMB3
															MASP1
															PDGFRA
															HS3ST5
															SOSTDC1
															LMOD1
															SLCO3A1
															ATP10D
															FBLN5
															PON3
															HACD4
															SHD
															SMPDL3A
															IQSEC3
															LRRK2
															SLC38A8
															WDR87
															C20orf144
															RARB
															PON1
															SMC1B
															TRPV5
															MECOM
															C2orf16
															PCDH19
															DYNC1I1
															CHST4
															VAX1
															SLC13A4
															SOWAHA
															NUTM1
															F10
															WWOX
															ACY3
															FAM13C
															CEACAM16
															SEMA5B
															ATP8B4
															TNFRSF10C
															SHOC1
															PFN4
															LAMA4
															ELOVL2
															ERVW-1
															MROH8
															IL20RA
															C8G
															TMEM139
															APBA2
															CCDC81
															ALPL
															FAM110D
															CLEC20A
															NID2
															SLC34A1
															TNFSF15
															DCAF8L2
															ECM2
															DHRS2
															NPIPB12

## Sheet: C (Reactome)
							No	Signaling Pathway	KO (down)	KO-T (down)	KO (up)	KO-T (up)				NGS data used
	Optimized (minus_added)						1	Signal Transduction	108	65	78	97				KO down	KO up	KOT down	KOT up
	Signaling Pathway	KO (down)	KO (up)	KO-T (down)	KO-T (up)		2	Developmental Biology	91	50	28	57				ZNF91	PRKN	MAGEB1	SPX
	Signal Transduction	-108	78	-65	97		3	Metabolism	70	63	43	65				EXO5	PPP1R1B	ZNF850	HAS2
	Developmental Biology	-91	28	-50	57		4	Gene expression (Transcription)	57	49	20	39				TIMP3	IL1RN	ZFP30	TKTL1
	Metabolism	-70	43	-63	65		5	Neuronal System	35	22	17	19				SLC40A1	DMRTA1	ICAM1	CLDN2
	Gene expression (Transcription)	-57	20	-49	39		6	Nervous system development	24	10	13	18				SMIM22	HAS2	HNF4A	DMRTA1
	Neuronal System	-35	17	-22	19		7	Post-translational protein modification	41	33	33	36				MGAT4C	TNFRSF8	B3GALT1	C4orf54
	Nervous system development	-24	13	-10	18		8	Extracellular matrix organization	21	16	22	28				CSRNP3	BST2	ANO5	ADTRP
	Post-translational protein modification	-41	33	-33	36		9	Signaling by Receptor Tyrosine Kinases	15	13	16	19				TUSC3	SLC5A1	MGAT4C	MANSC4
	Extracellular matrix organization	-21	22	-16	28		10	Cell Cycle	6	6	7	12				ZNF550	IFFO1	ANKFN1	ABCA6
	Signaling by Receptor Tyrosine Kinases	-15	16	-13	19		11	Cellular Senescence	5	4	9	14				SCN9A	GGT5	ZNF493	ABCA9
	Cell Cycle	-6	7	-6	12		12	Apoptosis	5	2	3	6				SCN3A	FILIP1L	CFAP53	PTPRR
	Cellular Senescence	-5	9	-4	14		13	DNA Repair	3	4	2	4				CSMD3	CHRM1	LTA	COL20A1
	Apoptosis	-5	3	-2	6		14	Chromatin organization	4	7	3	3				ZNF432	SUSD4	ITGBL1	CEND1
	DNA Repair	-3	2	-4	4		15	mRNA Splicing	1	1	1	1				SLC12A5	CEACAM20	RAPSN	MAGEA9B
	Chromatin organization	-4	3	-7	3											PGBD5	CHRNG	RBBP8NL	DKK4
	mRNA Splicing	-1	1	-1	1											RPL17P47	LSP1,MIR7847	OR7D2	OPRD1
																ZNF20	SPDYE2	ZNF80	CCDC80
																ZNF625	NFAM1	MEI1	ALDH3A1
																STXBP6	QPRT,SPN	ZNF550	PNPLA1
																MUC13	PTPRR	GRIN3B	CHRM1
																AOAH	GAL3ST2	TAF1L	TNFRSF8
																MIP	IDI2	CYRIA	MTTP
																SLC16A2	COLGALT2	VANGL2	ACTN2
																MMP13	ADTRP	ZNF426	DCAF8L2
																LCTL	BDKRB1	PIWIL4	SPARC
																RPS4Y1	MANSC4	TIMP3	FRMPD2
																RERG	COL10A1	RNASE1	SMPX
																IRAG2	THBS2	PAH	SLC22A16
																SGCZ	SYNGR4	FAM25A	IFFO1
																PDE6A	PRSS33	PRSS35	COLGALT2
																NTRK2	LY6D	PLA2R1	GSG1
																AKAP14	CNDP1	FAM229A	RNF222
																SOX5	CDH23	C9orf24	RGS4
																ACTL7B	DUSP13	GALNT3	SLC25A47
																OR13A1	DKK3	RUBCNL	DMBT1
																ST8SIA1	A1BG	ZNF419	SEMA3A
																RNU1-149P	AKT3	REELD1	FGD2
																CGB5	CPAMD8	RASEF	KCNQ3
																KCNMB2	CLDN22	RAB40AL	EDN2
																KCNH8	CABYR	FTCD	LRRN3
																HSPB7	NMUR1	CACNA1G	DRC7
																SPRR2D	PTGDS	PYGM	MPIG6B
																FGF7	COL20A1	APBA2	PRKN
																PKHD1	RBMS3	GPBAR1	HLA-DPB1
																RELN	SPX	SLC22A1	SHBG
																OR6P1	NCKAP5	CFAP91	IL1RN
																GPA33	DHRS9	MUC20	BST2
																GPR151	TMEM88	RIMS2	A1BG
																HAO2	ABO	POU2F3	AQP8
																PRB3	CFB	IL32	FLT4
																PRCD	FUT3	C17orf107	SPN
																ZNF521	CLDN2	RPL17P47	QPRT
																JAKMIP2	CLTRN	GFY	COL25A1
																ADAM28	GPM6B	CA9	HHIP
																KRT37	CLPSL2	RNF224	ORM1
																DLX3	ZNF853	SMIM22	FILIP1L
																HRC	PARP10	SLC39A2	CAVIN2
																SCN1A	CCDC183	CHST4	GPR55
																ZPLD1	FGD2	SMIM38	RBMS3
																MMRN1	CLCNKA	CGREF1	CXCL8
																FAM170A	SEMA3A	PKDREJ	COL14A1
																PADI1	TSPAN19	NECTIN3	PDE1C
																NTRK3	RHOXF1	CATSPERZ	GGT5
																KRT34	SERPINE1	UPB1	GPR156
																ERG	DGCR6	NPIPB3	SOX6
																BMP5	CXCL8	C7orf31	FSTL5
																DLC1	DMBT1	CLEC18A	FCGRT
																INHA	THRB	JPH3	GPR15
																VSTM1	KCNQ3	RNF112	ZNF853
																HSD3B2	HK3	PROX2	CCDC85A
																PROX1	ATP4A	PBX1	GGT6
																NPY4R2	SPDYE5	EHF	PGC
																DYDC2	FAM71A	GP6	TEX11
																HCAR2	EFEMP2	FBLN2	SNTB1
																ISLR	RARRES1	TENM3	NCAM1
																RORA	SOX6	MYBPHL	SERPIND1
																TMEM220	GDF7	GNG3	ABCB5
																CPLX4	ZNF404	NRN1L	TMOD4
																ZBTB32	NXF3	RAB34	GRAP2
																ZNF528	TKTL1	ANGPT2	NNAT
																ZNF880	GFRA3	GRIN2A	TRIM22
																ZNF331	HTRA3	SPATA9	PRICKLE2
																ZNF773	SHC2	SLC16A2	AZGP1
																G6PC2	IRGM	GGN	PARP10
																PAK5	SPEM2	RNF148	GALNT15
																KCNJ4	AQP11	ENPP3	LRIT3
																PRR23B	EFCAB13	PLIN1	NUPR1
																C3orf70	LRRD1	XG	SLC12A3
																THEGL	OR2A42	MMP14	TSPAN7
																RNF180	FN3K	DHH	IL1A
																GCM2	HORMAD2	KLHL10	CHRNG
																TCP11	MB	SLC22A14	LRRC34
																PLPPR1	MYRIP	FAM50B	PPEF2
																TEKT2	WNT8B	TACSTD2	TRPC5
																HTR3A	CHAT	SAP25	SPI1
																MARCHF10	AOPEP	YPEL4	JAM2
																RAX2	TRIM71	SLC35G5	TSPYL5
																RASGEF1B	GSG1	IHH	DNAH7
																PRR23D2	LRRN3	YPEL3	GPM6B
																FBP2	ABCA6,ABCA9	TMED6	CEACAM20
																SCCPDH	CDK5R2	PRLHR	ZNF423
																CCKBR	COL25A1	SOX5	PPP1R1B
																SCN2B	LY6K	BEX4	ADAM23
																KLF1	PIANP	CFAP77	KRT81
																ZNF836	GSTA4	LRTM2	KRT17
																PLCL1	SPARC	MEOX1	POU5F1B
																CYTIP	CATSPERG	ERICH4	KCNIP4
																C2CD6	TMOD4	FBN1	SPON1
																FLRT3	NPR1	RASL10B	ALOX15B
																FOXA2	ADGRD1	ARL10	THBS2
																NPY1R	DRC7	PANX2	SUSD4
																ARHGEF35-AS1	LHX3	PKIB	FOXD4L6
																OR2A1	ZAP70	NPIPB5	GSTA4
																EYA1	DNAAF6	TMEM150C	IKZF3
																CALCB	TSPAN7	GPT	LRRC2
																LMNTD1	DEGS2	ADRA1B	ATOH8
																DCN	TPBGL	ANKK1	LONRF2
																C17orf98	LRG1	KRT20	PTGDS
																PNMA8C	SYCP2	MSH6	THRB
																CD93	IGFALS	ACSL5	CCL28
																MYOZ2	OIT3	CYP4F3	CLTRN
																BASP1	TCF21	ONECUT3	CALHM5
																HDGFL1	ABCA4	PCBP3	CXCR4
																SLC13A1	LONRF2	RHBDL1	RUNDC3A
																TRMT9B	LSAMP	TAS2R10	INSC
																TNFRSF14	CACNA1D	PPP1R2B	MTMR7
																IFI44L	ZNF423	AKR7A3	PIGR
																ADGRL4	IL17REL	CDHR5	EBLN1
																SRGN	NIPAL4	SSC5D	CD4
																SFTPA2	UBL4B	SBK2	NEURL3
																CALY	TSHZ2	GNAT1	MACROD2
																DEFB108B	GP5	ZNF432	POU3F2
																UPK2	MYO15A	ANO2	PRSS33
																GPR152	IGFBP4	TAS2R13	RRH
																VSIG2	KISS1	TTYH1	TEX14
																CLEC6A	PPEF2	SULT1A2	DPF3
																SLC39A5	MCHR2	SLC9C1	HKDC1
																LGR5	CCDC181	TSKS	CTSE
																KLRC1	PROM2	LARGE1	AQP11
																SCEL	SPNS3	TM4SF18	VIL1
																TSHR	RAB9B	HYAL1	AOPEP
																SLC8A3	FSCN3	FXYD4	EPGN
																GOLGA6C	GREM1	OSCAR	ANGPTL2
																ODF3L1	IFITM1	RAD21L1	KRT86
																TRPM1	CACNB2	SLC7A9	DQX1
																BCL2L10	CD300C	MYOM1	FAM166A
																OR1F1	FLT4	HEPHL1	FAM107A
																TRK-CTT4-1	FCGRT	RNF225	AFAP1L2
																GNAO1	SNTB1	ZNF280A	ADGRD1
																RCVRN	PNPLA1	ZNF615	LRRC15
																MYH13	SERPINF1	GAS1	LRRK2
																TBC1D3I	GPR37L1	DYNC1I1	ITGA11
																KCNH4	CALHM5	GOLGA8T	TTN
																CELF4	DRD1	OR2D3	CFB
																GZMM	CACNA1E	KRT37	CPA5
																ZNF429	C4B	PEAK3	CCDC73
																ZSCAN5B	ALOX15	RNF183	NDUFA4L2
																CNGA3	TMPRSS13	KSR2	AFF3
																CAV3	STPG4	CABP1	DNAH11
																GADL1	C2	PLD5P1	CLCNKA
																CD80	ATP6V1B1	THBD	NID1
																CXCL13	CLUL1	C4orf19	FOXQ1
																GHR	TSNAXIP1	CABLES2	PRDM12
																SNCB	CDKN2B	H2BU1	S100A1
																SMOC2	NDUFA4L2	MAL2	IDI2
																PRR18	NCAM1	GNG8	C6orf58
																EPO	IL1A	AK7	TNFSF18
																SAMD9L	EYS	CLIC3	NUP210L
																NRCAM	CPXM1	HSPA12B	CDYL2
																IQCA1L	C4orf50	SMIM32	COL8A2
																UNC5D	HES7	B3GAT1	SPAG8
																DNAJC5B	SLC32A1	TGM4	CACNA1E
																CSMD1	TRPC5	TRPV5	CRTAM
																ADRA1A	KLB	DAPK1	IGFBP2
																DUSP26	TMEM132B	CYP4F12	VIM
																ARMCX4	ACCSL	TMEM170B	SMIM6
																HTR2C	PLEKHS1	TEX12	ITGB6
																TCP11X2	WDR97	NANOS3	ASB18
																CAMK1G	FST	NKD2	FER1L6
																MAJIN	PKNOX2	KCNMA1	CYP4A22
																AQP5	GAST	FNDC1	TLX1
																C12orf56	CCDC187	GRK7	SRD5A2
																CCDC169	EVA1A	LHFPL6	DGCR6
																SOHLH2	SNHG28,VSIG8	KRT13	HEY1
																ZG16	LGALS9	DTX1	TRIM55
																CGB1	LYPD1	TBX2	RAB33A
																SCN7A	LEMD1	SHD	DCT
																DUSP15	OAS2	ALOX5	EFCC1
																FOXS1	PDE1C	BFSP1	MAG
																APOL3	FRMD7	GALNT9	C4B
																ZNF662	MYLK3	LIPG	DRD1
																WNT5A	MMP9	C13orf46	SERPINE1
																POU5F1	BEAN1	FA2H	TSPAN19
																FAM71F1	KCNT1	SLC25A34	ZFP69
																VIPR2	EPS8L3	PPP2R3A	MB
																LRRC7	SOX10	GMFG	DLK2
																ITGA8	CPNE5	STX19	DNAAF1
																NRAP	CLEC17A	CCDC92	LEXM
																CRTAM	SLA2	ALPP	LSP1
																LRRC4C	ASIC4	NTN5	GALNT8
																TENM4	HLA-DPB1	SPOCK3	PIANP
																ZAR1L	RPE65	KRTAP5-10	ZNF750
																NGB	MORN5	GPR182	HRH4
																HBZ	OR52B2	HPD	CLDN11
																OR4D1	TTLL13P	GOLGA8R	HK3
																KRTAP2-2	PRSS48	NANOGP8	KCP
																APCDD1	LDB3	TCAP	SLPI
																CTAGE1	GPR156	ZNF521	ANXA10
																ZNF571	FBLIM1	GALR3	BTBD17
																TCF23	STAB1	PGAM2	NEDD9
																WIPF1	PYGO1	KCNT1	CCDC63
																MARCHF4	NOS2	MYO16	ZAR1L
																SCRT2	SPATC1	AOC3	HBA2
																MAP3K7CL	SLC25A18	BACE1	PSG9
																KRTAP19-2	KY	ANKRD22	MGAM2
																CCRL2	BARHL1	CRB2	SP5
																FBXW12	PRDM12	IMPG2	TSPOAP1
																HTR3C	VWF	GRK1	FRMD7
																TIMP4	ERN2	CYP39A1	SLC9A9
																LYZL4	TBX4	MOXD1	CAND2
																ENAM	MEFV	CPLX1	AKT3
																GLRB	FXYD7	SYT3	MAP3K7CL
																GNRHR	PPEF1	CDKL4	KLB
																IL7R	FBLL1	DHRS2	RIMKLB
																FYB1	ACTN2	ETV2	SCIN
																MEIKIN	POU5F1B	DLX3	SYT5
																MUC21	DKK4	KCNE2	COL4A2
																PBOV1	ITGAX	SLC10A6	HSD17B1
																PIK3CG	CLEC18C	DCLK1	CCT6B
																CPA5	SEC14L5	NPIPB13	TNFRSF9
																WNT2	IDUA	EPN3	MYLK3
																DOK2	ORM1	MYPN	CYP2J2
																STAR	F5	SCUBE1	IL7
																CCL27	PTGS1	COL4A1	IFI44
																ZFY	SPDYA	FSTL4	ANKRD45
																DDX3Y	PDZD9	TMEM61	PRSS37
																MAGEB1	RAB33A	TBC1D3D	TCHH
																HES3	ARMH1	SOX15	ADGRL2
																UBE2U	FAM166A	ZNF709	CCDC177
																ADGRL2	SRD5A2	SYN1	C2CD4A
																BRDT	C4orf47	COL4A3	NEUROD1
																CD2	CARD14	PADI1	GRM1
																TDRD10	CFH	DCST1	FSIP2
																BECN2	C2orf73	GRAP	SHC4
																NPPA	LRRC2	FUT6	CABYR
																KLF18	RUNDC3A	CAPN13	IGFL2
																KCNA2	PPP1R3G	PAX5	ROBO4
																C2CD4D	SLC22A18AS	ADRA2A	ASPRV1
																SPRR2E	VGF	SHANK2	CACNB2
																S100A7	SYT5	SPATA12	LHFPL5
																CCDC190	SLC22A18	SPTSSB	TLCD3B
																NPHS2	SCIN	SLC2A1	PLPPR4
																CACNA1S	PRKAA2	NFATC2	TGFB2
																MYBPH	HTR2B	LIN7B	VARS2
																PIGR	DNAAF1	SPATA4	C2orf73
																SLC30A10	AP3B2	HOXC8	LAMB4
																PLPP4	SYCE3	MDGA1	KCNS2
																EBLN1	IL12RB2	NES	LIN28A
																CRTAC1	KCNJ1	KRTDAP	POU4F3
																SORCS1	HKDC1	ADAM8	EFCAB6
																SYT9	NR4A3	ONECUT1	ISM1
																FAM180B	TMEM8B	LDB3	CXCL1
																DEUP1	CNR2	BIN2	TCEA3
																OR10D3	PLPPR4	ZNF773	BICC1
																VSIG10L2	PXDN	C20orf203	CATIP
																KRTAP5-2	CFAP99	MITF	RIMBP3B
																OR56A1	CLVS1	HTRA1	FAM71A
																GDPD4	B3GALT2	RASSF6	INHBE
																CARD16	SLC5A2	PLEKHA6	HCN1
																GALNT8	SPATA1	PRSS27	NRAP
																CLEC4D	ADHFE1	SCN4A	BMPR1B
																PDE1B	JAM2	DCDC2B	EXOC3L1
																CLEC7A	PGM5	FAM228A	WNT2
																ERP27	PRSS56	CCDC170	TFEC
																KRT82	COL13A1	ERVW-1	TSLP
																KCNC2	BCAN	CARD9	MYOM2
																HCAR1	SLPI	C17orf67	PLGLB2
																SLITRK5	SLC27A1	NLRP4	SERHL2
																KLHL1	ACE	SLCO3A1	CCK
																VRTN	PLA2G10	CAMK2N2	EFCAB5
																KLHL33	CA14	KRT15	IGFBP4
																SLC28A2	FOXJ1	PRPH	NCF4
																LIPC	CLCNKB	GNG13	S100P
																PERCC1	AFAP1L2	IL31RA	OTC
																ACSM2A	GALR2	PHTF1	MORN5
																APOBR	ACP3	ZFP14	ACCSL
																SLC12A3	DQX1	TNFRSF19	NKAIN3
																TEPP	COX8C	SERTAD4	GPR119
																CES4A	LDLRAD1	TBC1D3L	SPRY1
																CLEC3A	CREG2	GRB14	COL13A1
																HSD17B2	CCT6B	PLIN4	MGAM
																RGS11	ESYT3	PPFIBP2	HAGHL
																OR1A1	KCNK12	P4HA3	FAM20A
																GLP2R	CTAGE6	FGF8	NECTIN4
																UNC45B	KCP	LRRIQ3	PLPP3
																ABI3	RASD1	CYCSP24	CD300C
																LPO	SERPINA1	RASSF10	TMEM154
																KCNJ2	ZBTB18	GLIPR1L1	SLC38A4
																P2RX1	PDZD2	RERG	PPP1R32
																SLC47A2	CAPS	MTUS2	HLA-DRB1
																GALR1	GRIA4	HAPLN4	CSAG2
																CDH2	TMPRSS4	ATP2B2	LRP1B
																PINLYP	TMC4	RASGEF1B	LY6K
																KLK3	INSC	ZNF300	ADCY5
																ZNF610	CBY3	PRDM8	CYP26A1
																COMP	CYP2D6	KCNK2	NCKAP1L
																CYP2A7	KIF26B	CPN1	ITGAM
																ZNF841	KIF1A	ZNF611	CABP5
																HOXD13	BICC1	IAH1	PLA2G4
																ADAM23	C10orf143	OR4F16	CD38
																MOGAT1	NLRP12	MUC4	ABCA12
																BOLL	COL6A6	CASS4	HTR2B
																IQCA1	CCL28	GALNS	ZFP42
																XKR7	NRN1	TAF15	GRM3
																ADIG	C9orf131	TAFA2	ALOX15
																WFDC13	OPRD1	ZC3H6	WNT8B
																DOK5	CLIP3	HOXB8	UTS2R
																RFPL1	PRKG1	SLC2A7	TMEM163
																MGAT3	TLR5	SGPP2	PLCL2
																MLC1	ARSD	OR10H1	P3H2
																HHLA2	METTL7A	OTOA	VGF
																GAP43	SLCO2A1	GLIPR1L2	OR9A4
																CLDN11	LHFPL5	KIF7	IL17B
																SLC51A	FOXD4L6	ATP10D	ALPK2
																CYP8B1	NPAS4	RNF39	HOXD8
																LRTM1	ZFP3	GCM1	DDIT4L
																FEZF2	NEUROD2	SLC2A12	PKD2L1
																PROK2	PTH2R	HACD1	PXDN
																FGF12	NEURL3	SH3PXD2B	CLUL1
																SPATA18	SYT15	WWC3	TSSK1B
																TMPRSS11E	NPB	CDHR3	KDR
																FGB	KCNK7	ZNF836	C9orf43
																TDO2	MTTP	PLCL1	FGG
																LDB2	ACTA2	KLHL3	PRSS36
																SULT1B1	SYTL5	C1orf210	WDR49
																C4orf54	ALDH3A1	RRAD	NPR3
																GLRA3	RSPH6A	TRIM73	C4orf51
																LRRC14B	PLD4	MAN1C1	CEMP1
																FAM81B	IFIT2	PKDCC	LEFTY1
																PRLR	COL14A1	C9orf153	GLTPD2
																PLCXD3	EIF2S3B	GPR35	FUT3
																FGF10	IHO1	GJB4	NRP1
																GLRA1	GRM2	SLC2A3	CLIC5
																GMCL2	SCX	ZNF137P	FCN3
																SCGB3A1	ROM1	SMCO2	CACNA1S
																MUC22	ATP13A4	MYO10	PCDH15
																GLYATL3	CNTNAP3C	LOC101927668	NAALAD2
																KCNQ5	SKIDA1	NPIPB6	PDE1B
																MEI4	TCEA3	CHADL	DLEU7
																POU3F2	STAT5A	CEL	SLC7A10
																SMLR1	MAP1LC3B2	C15orf62	ABCG8
																TTLL2	PLAU	TIMM17B	PID1
																IP6K3	GOLGA8T	LOC100418997	LSAMP
																TMEM244	CDK15	PLCH2	MCHR2
																NOX3	ZC2HC1B	CALML4	NPC1L1
																IL6	H3C8	ZCWPW2	NPBWR1
																ASB4	DNAH2	FBLN7	IFNE
																CYP3A43	RBBP8NL	DRP2	DNAJC12
																GPR22	ANKRD2	SCNN1A	SLC3A1
																STRA8	ALPK3	BTLA	DCST2
																RSPH10B	LRRTM2	RBP7	FGF21
																NACAD	ABCA3	WNT9A	KRT6A
																TFPI2	CD22	SIMC1	RELB
																MOGAT3	ATP6V1C2	GUCY2D	TMEM140
																GIMAP6	EID2B	ILDR1	RPE65
																DLGAP2	TLL2	ITPR2	ZNF648
																RP1	FAM20A	ERFL	ABCA4
																XKR4	TAGLN3	CNTNAP2	CCN2
																NKAIN3	SLCO5A1	H2BC13	LYG2
																STMN2	ANKRD45	AKAP14	RTN1
																NECAB1	CASTOR1	PROX1	FOXD4L1
																FGL1	TTLL1	F5	ACTL10
																NEFL	SLC38A4	KRTAP5-8	REN
																KLHL38	SPTBN5	MUC6	HPGD
																COL15A1	CNTN1	TSSK4	SEC31B
																OBP2A	ADGRD2	RORA	ZBTB7C
																LRRC19	KCNQ1	NECAB2	CLDN9
																FAM221B	UTS2B	CPSF4L	DHFR2
																ASPN	IL7	CACNG7	APBB3
																SOHLH1	XCL1	RSPH6A	LGALS7B
																FRMPD4	TRIM54	KCNJ4	GNAT2
																GATA1	SHH	VGLL3	SPAG4
																HEPH	GCNT3	THEGL	HES7
																SASH3	LIF	PALM3	MAP2K6
																CXCR3	LCP1	TAF9B	PSTK
																DMRTC1	WDR86	RAG1	EVA1A
																NEXMIF	FOSB	KLF12	GNG11
																POF1B	CATIP	VWCE	ALOX12B
																AJAP1	TMEM178A	MAGEE1	TCF21
																TEX38	ADAMTS10	PINK1	TRABD2B
																PTGFR	ABCC3	EFCAB12	PLCD4
																SPRR4	NAT16	CRAT	LCT
																CADM3	NECTIN4	CLEC2D	WNK3
																CASQ1	CD79B	CYP2C8	OR52H1
																TRAF3IP3	GRIN2C	EIF4E3	VSTM5
																C1orf87	SEMA3B	SERINC2	KLHL33
																TXNIP	TBX2	KRT23	CYP27B1
																NR1I3	CAND2	DACT1	RGPD6
																PDE6C	SPAG4	INPP5A	FAM166B
																TMEM273	PPP1R27	AURKC	ELAPOR1
																GFRA1	SPDYE2B	RASL11B	CORO1A
																C11orf21	BDKRB2	DYRK1B	RAD9B
																SPI1	SYTL1	POU3F1	DMRT1
																FAM181B	PAQR6	SV2A	CCDC28B
																SLN	SIK1	SEC14L5	H3C3
																SMIM35	TMEM229B	SBK3	HLA-DOB
																KRT6A	CXCL2	SCX	PHGDH
																KRT2	CEBPD	ANO7	ODF3B
																KRT4	RBM46	PRR36	IFIT2
																TBX5	SATB1	FXYD3	HYDIN
																HCAR3	LRRC4	BICRA	SPTY2D1OS
																RPGRIP1	AKR1C3	H4-16	FBXL22
																NRXN3	HEY1	PNPLA7	SNHG28
																ISM2	PLGLB1	CEP112	VSIG8
																GABRG3	GALNT14	KCNK9	LRRC26
																CTXND1	ASIC3	FRMPD1	SLC5A2
																NPIPA3	LTBP2	PPP1R13L	BCL11B
																AQP8	EFCAB5	ZNF846	SCRN2
																CETP	SEZ6	SSUH2	GLIS3
																BCO1	SPATA32	TRPC1	KRT80
																ZSCAN10	ATP5MGL	ME3	CNFN
																TRARG1	TLX1	NYNRIN	FAM184B
																PRAC2	NHSL2	CD19	GPNMB
																WFIKKN2	SYPL2	STARD6	FOXD4L5
																GGT6	PKD2L2	RAX2	HAP1
																KRTAP1	CCIN	ALB	CRYBB2
																KRT33A	TRIM22	KRT19	MAML3
																DSG3	SUSD2	HSPB8	CA14
																LGALS14	YIPF7	ASIC3	SLC18A2
																CALR3	PARD3B	LYPD6	MAGIX
																LGALS7	PCDHB1	P2RY6	NRXN2
																PSG11	SMIM6	YBX2	CLCNKB
																PSG9	NTN3	PPDPF	CFHR1
																ZNF418	DIO1	KCNQ1	MORN4
																SAG	ADSS1	IQCM	EMILIN1
																CHST10	CXCL17	SLCO1B3	RHCE
																TMEM163	OPRL1	SLC2A5	RINL
																ABCB11	UBASH3A	KIAA1217	MLIP
																KCNK15	STK31	MOCOS	CDKN2A
																SERPIND1	GPR15	SLC8A2	LYPD1
																LGALS2	TNNT2	DAPK2	TKTL2
																BFSP2	ASB18	MNS1	APOD
																ROPN1	IL9R	SYN2	GDPD4
																DNAJB8	MGMT	FAM214B	ZFP3
																S100P	SP5	HMGN5	ATP4A
																TLR2	ADAMTS13	BTBD16	CDH4
																RXFP1	TREH	PCLO	PTX3
																IGFBP7	ANKRD22	CEP295NL	NRN1
																UNC5C	ASB9	CHST5	KLHL38
																GYPA	KNDC1	FAM81A	NAALADL2
																NNT	ITGB4	CHPT1	PRTG
																C5orf47	CHRND	CCDC136	TP53I3
																SLC6A3	FNDC9	MCF2	PTGDR2
																HAND1	SCNN1D	FBLN5	B3GALT2
																KCNMB1	ATF3	LOC107986372	RGCC
																OR2J2	YPEL1	IFITM10	KIF19
																GUCA1A	CYGB	P2RY4	HLA-DOA
																TMEM151B	EYA4	CRYBG2	CYP19A1
																TREML2	CIART	OTUD7A	MRGPRF
																EPHA7	PRSS36	NLRP14	SATB1
																SLC22A16	ASB2	ZNF133	NOXO1
																ABCB5	SLC24A2	PPL	RIMBP3
																GPR141	SELPLG	CCDC159	FBXL15
																CHRM2	PTAFR	TRIML2	CEACAM1
																LAMB4	PGGHG	PTCH2	ENO3
																OR9A2	CRYBB2	SPDYA	VIPR2
																SDC2	KLHDC7A	TRPV6	NRP2
																FAM90A21P		WAS	CEBPD
																FABP12		TSPAN1	UBA7
																TSPYL5		MUC5B	H2BC1
																SLC28A3		EGFR	DDX25
																OR1L8		GRHL2	PNLDC1
																FAM163B		ZSWIM9	STRA6
																PAGE4		NCOR2	ASNS
																KLHL4		NOX5,SPESP1	CNTN2
																GPR50		ADAMTS6	EPO
																RTL8B		PRTFDC1	TEK
																ZFP30		ADAM12	FOXD4L3
																TM4SF18		KCNJ5	FDXR
																IL32		SYK	RFTN1
																ZNF595		CNOT3	FOXD4
																ANO5		TTLL7	FBLIM1
																B3GALT1		CCM2	VSTM2L
																ZNF850		ZNF83	IL17D
																ICAM1		FAM219A	C11orf86
																FAM50B		TBX1	FST
																DCLK1		LYVE1	CDKN2B
																ANKFN1		PRRG4	JRK
																CLMP		PPP4R4	OR4D1
																CD36		TCF7L1	STAR
																HNF4A		TRIM17	NDNF
																ZNF280A		FOXC2	ANKRD63
																GPC5		PLEKHH2	ZAP70
																GNA15		FLT3LG	C16orf91
																RUBCNL		THSD1	ZNF425
																DSG4		OBSCN	CIDEB
																HYDIN		TC2N	TNNI1
																FZD8		SPIB	H1-6
																CNTNAP2		TEX29	SLC6A20
																CLEC4G		HMGCS1	SLC6A4
																EXTL1		SLC35D3	COPZ2
																APOC1		EHBP1L1	ROM1
																MITF		COL1A1	LRRD1
																SLC2A3		SLC7A2	C1QTNF8
																EHF		ERICH1	SLC1A2
																ERAS		SLC25A42	KCNAB1
																PLA2R1		C1orf116	GGACT
																TEKT5		CLMP	MISP3
																SLFN12		OSGIN1	RSPH9
																NOSTRIN		GPR83	LRG1
																COL6A3			HLA-DMA
																KIF7			MATN4
																GRIN2A			GOLGA6C
																GFY			MEFV
																RLN2			STAT5A
																PXT1			STPG4
																IGFL2			DDX4
																MMP19			NIPAL4
																CATSPERZ			GJB7
																MUC4			RNASEH2C
																MUCL3			LGI4
																ZNF493			KCTD4
																KRT83			MINDY1
																TENM3			GPRC5D
																GAS1			MYADML2
																KLHDC9			PTGS1
																KRT13			RAB7B
																ADRA1B			LCP1
																CYRIA			LAMA2
																ANGPT2			LRRC75A
																KLHL10			LTC4S
																PPP1R36			DDR2
																MEIOSIN			STAG3
																C19orf67			PVRIG
																FGF9			PSMB8
																FGF21			HGD
																SPOCK1			ABHD14B
																GCHFR			TCF23
																OR2D3			SFTA3
																ATOH7			CMYA5
																GNG2			IL23A
																SBK2			C19orf73
																IL2RB			IRF4
																CCDC65			BCAN
																AKNAD1			MEGF11
																STMN4			CBLN3
																C4orf19			HAPLN3
																AMIGO1			ATP12A
																HCK			CCDC87
																PDCL2			IFIT3
																ZNF615			PSMB9
																MMP14			TREH
																C10orf62			CD33
																OR2D2			ZNHIT2
																RHO			INSYN2A
																KRTDAP			CHST2
																SLC10A6			ACVRL1
																GRHL3			AADAC
																ITGBL1			EXOC3L4
																LINGO3			C3orf22
																TXLNB			IGSF1
																MSH6			RUNX2
																GAS2			GALNT14
																SGIP1			NAT14
																B3GAT1			PRKAA2
																TBC1D28			TMEM175
																PKDCC			STX1B
																RIMS2			TLR5
																ABCD2			MAPK15
																IL1R2			MDH1B
																OR2B6			DNAH2
																EDA2R			SAMD15
																MYO1A			C1QTNF4
																SCN2A			SHLD1
																TAT			AGMAT
																SLAMF7			OIT3
																PDCD1			PDE6C
																KIAA1210			DKK3
																COL21A1			TBX5
																DACT1			KCNK12
																CPN1			FBXW12
																ITLN2			TIMP4
																ANKRD1			HTRA3
																NRN1L			IGFBP7
																CHRNE			CLDN22
																BTK			STK31
																CD200			VSNL1
																ALPP			TNFRSF1B
																HIF3A			CARNS1
																NECTIN3			F2RL2
																GNG3			C1orf226
																KCNK2			PI15
																ILDR2			QTRT1
																MMP1			MMP24
																RAD21L1			SLC25A18
																CSTA			TG
																XG			CNTD1
																TIMM17B			PYGO1
																CD96			SAMD13
																LURAP1			GLYCTK
																CUX2			SPATA20
																NPTX1			RAB19
																PPP1R16B			DMC1
																VGLL3
																CD38
																ELN
																MOXD1
																GCK
																UTS2
																GCNT4
																PPP1R1A
																CYP2C8
																SCRT1
																LGALS4
																ME3
																STARD6
																DAPP1
																PRSS37
																MEP1B
																GRM8
																TAS1R2
																ASCL1
																PTX3
																CDC20B
																CALN1
																IAH1
																TULP1
																SLC2A1
																CAPN6
																DZIP1
																HAPLN4
																GNA14
																ARL9
																UBE2L5
																C1QTNF2
																HAVCR2
																ENPP3
																GPR45
																MAGEA2B
																GASK1A
																ADGRE1
																ZNF439
																PLA1A
																OTP
																ZFPM2
																FAM25A
																SNORD
																SNHG14
																PWAR4
																IPW
																DGKI
																LHFPL6
																CCDC170
																KRT7
																KRT39
																ABCB4
																C5AR2
																BEX4
																SPDYE3
																STRA6
																MEIG1
																SUN3
																LONRF3
																CGREF1
																B3GAT2
																ZNF426
																ADGRG7
																ANO2
																PPP1R2B
																PLD5P1
																POU4F3
																CGAS
																CEND1
																TMEM150C
																RSAD2
																SLCO1B1
																NPL
																RHOH
																IRAK3
																XKR9
																AGBL2
																NANOS3
																PKIB
																TMEM217
																GPX2
																TMEM191C
																PNLDC1
																C11orf87
																FAM186A
																CTCFL
																RASGRP3
																LRRC10B
																SERPINC1
																SYCP3
																PKDREJ
																ATP6V0A4
																ARL14
																LIN28A
																ZBED2
																PEG10
																SPP1
																RAB34
																CCDC92B
																TAS1R1
																BSND
																MRC1
																MYADML2
																CCN5
																SIRPB1
																NEFH
																FAM153A
																FGL2
																STPG3
																SLC5A9
																CACNG6
																CALB1
																LRRC66
																DAPK1
																GREB1L
																ENKUR
																DDX25
																ERICH4
																PROCA1
																NPFFR1
																CD52
																LRRC71
																TBX21
																PRKAG3
																KCNMB3
																MASP1
																PDGFRA
																HS3ST5
																SOSTDC1
																LMOD1
																SLCO3A1
																ATP10D
																FBLN5
																PON3
																HACD4
																SHD
																SMPDL3A
																IQSEC3
																LRRK2
																SLC38A8
																WDR87
																C20orf144
																RARB
																PON1
																SMC1B
																TRPV5
																MECOM
																C2orf16
																PCDH19
																DYNC1I1
																CHST4
																VAX1
																SLC13A4
																SOWAHA
																NUTM1
																F10
																WWOX
																ACY3
																FAM13C
																CEACAM16
																SEMA5B
																ATP8B4
																TNFRSF10C
																SHOC1
																PFN4
																LAMA4
																ELOVL2
																ERVW-1
																MROH8
																IL20RA
																C8G
																TMEM139
																APBA2
																CCDC81
																ALPL
																FAM110D
																CLEC20A
																NID2
																SLC34A1
																TNFSF15
																DCAF8L2
																ECM2
																DHRS2
																NPIPB12
