# Supplementary material for: Morphological Changes Induced by TKS4 Deficiency Can Be Reversed by EZH2 Inhibition in Colorectal Carcinoma Cells
Source: Biomolecules. 2024 Apr 5;14(4):445. doi: 10.3390/biom14040445 (PMC11047920; doi:10.3390/biom14040445)
Supplement: Supplementary file 1 [file biomolecules-14-00445-s001.zip › Supplementary Table S2.xlsx]

## Sheet: A (WT-T_WT)
test_id	gene_id	gene	%	FC	locus	sample_1	sample_2	value_1	value_2	log2(fold_change)	value_1_corrected	value_2_corrected	log2(fold_change)_corrected	test_stat	p_value	-log10(p_value)	q_value	type	chr_name	chr_location	chain	ENSG_id
XLOC_026597	XLOC_026597	A1BG	164.101	1.64101	chr19:58345182-58366578	TKS4_WT	TKS4_WT_T	31.2442	82.5164	1.40109	31.2442	82.5164	1.40109	0.351288	0.5973	0.223807	0.999503	protein_coding	chr19	58345178-58353492	-	ENSG00000121410.12
XLOC_006454	XLOC_006454	A1CF	-16.507	-0.16507	chr10:50799408-50885666	TKS4_WT	TKS4_WT_T	887.774	741.229	-0.260273	887.774	741.229	-0.260273	-0.156033	0.733	0.134896	0.999503	protein_coding	chr10	50799409-50885675	-	ENSG00000148584.15
XLOC_011468	XLOC_011468	A2M	223254	2232.54	chr12:8950043-9215657	TKS4_WT	TKS4_WT_T	0	223.354		0.1	223.354	11.1251		0.00035	3.45593	0.0966986	protein_coding	chr12	9067664-9116229	-	ENSG00000175899.15
XLOC_010251	XLOC_010251	A2ML1	28351.2	283.512	chr12:8822553-8887202	TKS4_WT	TKS4_WT_T	0	28.4512		0.1	28.4512	8.15235	0	1	0	1	protein_coding	chr12	8822621-8887001	+	ENSG00000166535.20
XLOC_002935	XLOC_002935	A3GALT2	-99.8933	-0.998933	chr1:33306765-33321098	TKS4_WT	TKS4_WT_T	93.7326	0		93.7326	0.1	-9.87241	0	1	0	1	protein_coding	chr1	33306766-33321098	-	ENSG00000184389.9
XLOC_034374	XLOC_034374	A4GALT	31.503	0.31503	chr22:42692111-42721301	TKS4_WT	TKS4_WT_T	10626.6	13974.3	0.395091	10626.6	13974.3	0.395096	0.347099	0.64905	0.187722	0.999503	protein_coding	chr22	42692121-42721298	-	ENSG00000128274.17
XLOC_011891	XLOC_011891	AAAS	17.3133	0.173133	chr12:53307455-53321610	TKS4_WT	TKS4_WT_T	43734.1	51305.9	0.230364	43734.1	51305.9	0.230366	0.244226	0.72915	0.137183	0.999503	protein_coding	chr12	53307456-53324864	-	ENSG00000094914.14
XLOC_011259	XLOC_011259	AACS	-7.83468	-0.0783468	chr12:125061274-125143327	TKS4_WT	TKS4_WT_T	12572.3	11587.3	-0.117707	12572.3	11587.3	-0.117704	-0.111538	0.8809	0.0550734	0.999503	protein_coding	chr12	125065434-125143333	+	ENSG00000081760.17
XLOC_035835	XLOC_035835	AADAC	66.5957	0.665957	chr3:151733926-151928175	TKS4_WT	TKS4_WT_T	2000.82	3333.28	0.73635	2000.82	3333.28	0.736351	0.397022	0.54655	0.26237	0.999503	protein_coding	chr3	151814073-151828488	+	ENSG00000114771.14
XLOC_035832	XLOC_035832	AADACL2	26932.6	269.326	chr3:151733926-151928175	TKS4_WT	TKS4_WT_T	0	27.0326		0.1	27.0326	8.07856	0	1	0	1	protein_coding	chr3	151733916-151761339	+	ENSG00000197953.6
XLOC_040071	XLOC_040071	AADAT	26.9588	0.269588	chr4:170060221-170091699	TKS4_WT	TKS4_WT_T	15211	19311.7	0.344362	15211	19311.7	0.34436	0.346228	0.67175	0.172792	0.999503	protein_coding	chr4	170060222-170091699	-	ENSG00000109576.14
XLOC_017647	XLOC_017647	AAGAB	19.3321	0.193321	chr15:67200666-67530146	TKS4_WT	TKS4_WT_T	77579.8	92577.6	0.254982	77579.8	92577.6	0.254982	0.232693	0.7493	0.125344	0.999503	protein_coding	chr15	67200667-67255195	-	ENSG00000103591.13
XLOC_029967	XLOC_029967	AAK1,LOC112268437	-18.6714	-0.186714	chr2:69457996-69643739	TKS4_WT	TKS4_WT_T	70337.7	57204.7	-0.298165	70337.7	57204.7	-0.298164	-0.312964	0.7068	0.150703	0.999503	protein_coding,-
XLOC_008077	XLOC_008077	AAMDC	-4.50438	-0.0450438	chr11:77660008-77994670	TKS4_WT	TKS4_WT_T	2117.05	2021.69	-0.0664893	2117.05	2021.69	-0.0664935	-0.00986357	0.97105	0.0127584	0.999503	protein_coding	chr11	77821109-77918432	+	ENSG00000087884.15
XLOC_031100	XLOC_031100	AAMP	53.2969	0.532969	chr2:218264126-218270181	TKS4_WT	TKS4_WT_T	66003.3	101181	0.616328	66003.3	101181	0.616328	0.635259	0.372	0.429457	0.999503	protein_coding	chr2	218264129-218270178	-	ENSG00000127837.10
XLOC_021538	XLOC_021538	AANAT	-54.8323	-0.548323	chr17:76453350-76470797	TKS4_WT	TKS4_WT_T	182.689	82.5164	-1.14664	182.689	82.5164	-1.14664	-0.402304	0.36125	0.442192	0.999503	protein_coding	chr17	76453351-76470117	+	ENSG00000129673.10
XLOC_031667	XLOC_031667	AAR2	37.5899	0.375899	chr20:36064890-36256941	TKS4_WT	TKS4_WT_T	41912.6	57667.5	0.460374	41912.6	57667.5	0.460374	0.376933	0.59355	0.226543	0.999503	protein_coding	chr20	36236131-36270918	+	ENSG00000131043.13
XLOC_051543	XLOC_051543	AARD	85253.6	852.536	chr8:116938206-116944487	TKS4_WT	TKS4_WT_T	0	85.3536		0.1	85.3536	9.73731	0	1	0	1	protein_coding	chr8	116938207-116944487	+	ENSG00000205002.4
XLOC_020096	XLOC_020096	AARS1	64.1811	0.641811	chr16:70252294-70289509	TKS4_WT	TKS4_WT_T	143762	236030	0.715286	143762	236030	0.715288	0.670624	0.3384	0.47057	0.999503	protein_coding	chr16	70251983-70289707	-	ENSG00000090861.17
XLOC_045101	XLOC_045101	AARS2	38.6209	0.386209	chr6:44297849-44313358	TKS4_WT	TKS4_WT_T	18435.1	25554.9	0.471149	18435.1	25554.9	0.471145	0.471553	0.50315	0.298303	0.999503	protein_coding	chr6	44298731-44313347	-	ENSG00000124608.5
XLOC_022308	XLOC_022308	AARSD1,PTGES3L,PTGES3L-AARSD1	18.0232	0.180232	chr17:42950525-42995142	TKS4_WT	TKS4_WT_T	13904.3	16410.3	0.239072	13904.3	16410.3	0.23907	0.125049	0.86165	0.0646691	0.999503	protein_coding,protein_coding,protein_coding
XLOC_039386	XLOC_039386	AASDH	14.6597	0.146597	chr4:56337686-56389418	TKS4_WT	TKS4_WT_T	21737.2	24923.8	0.197357	21737.2	24923.8	0.197358	0.207267	0.788	0.103474	0.999503	protein_coding	chr4	56338287-56387508	-	ENSG00000157426.14
XLOC_008256	XLOC_008256	AASDHPPT	7.69873	0.0769873	chr11:106046800-106098695	TKS4_WT	TKS4_WT_T	123423	132925	0.106999	123423	132925	0.107001	0.0930647	0.89365	0.0488325	0.999503	protein_coding	chr11	106075501-106098699	+	ENSG00000149313.11
XLOC_050267	XLOC_050267	AASS	-42.5448	-0.425448	chr7:122073543-122144269	TKS4_WT	TKS4_WT_T	9694.06	5569.74	-0.799492	9694.06	5569.74	-0.799491	-0.659157	0.35305	0.452164	0.999503	protein_coding	chr7	122064583-122144308	-	ENSG00000008311.16
XLOC_021011	XLOC_021011	AATF	8.7122	0.087122	chr17:36948953-37056871	TKS4_WT	TKS4_WT_T	58390.5	63477.6	0.120514	58390.5	63477.6	0.120514	0.133565	0.8438	0.0737605	0.999503	protein_coding	chr17	36948925-37056871	+	ENSG00000275700.6
XLOC_022798	XLOC_022798	AATK	17.1636	0.171636	chr17:81035130-81183166	TKS4_WT	TKS4_WT_T	3115.66	3650.42	0.228524	3115.66	3650.42	0.228525	0.0594987	0.916	0.0381045	0.999503	protein_coding	chr17	81110487-81166221	-	ENSG00000181409.14
XLOC_018571	XLOC_018571	ABAT	-19.561	-0.19561	chr16:8674616-8784575	TKS4_WT	TKS4_WT_T	7498.81	6031.97	-0.314032	7498.81	6031.97	-0.314032	-0.275648	0.6389	0.194567	0.999503	protein_coding	chr16	8674596-8784575	+	ENSG00000183044.12
XLOC_055033	XLOC_055033	ABCA1	-6.60307	-0.0660307	chr9:104781005-104939096	TKS4_WT	TKS4_WT_T	2161.42	2018.7	-0.0985576	2161.42	2018.7	-0.0985529	-0.0717072	0.9052	0.0432555	0.999503	protein_coding	chr9	104781006-104928155	-	ENSG00000165029.17
XLOC_022654	XLOC_022654	ABCA10,ABCA5	-17.3132	-0.173132	chr17:69148006-69327133	TKS4_WT	TKS4_WT_T	15564.4	12869.7	-0.274269	15564.4	12869.7	-0.274272	-0.272339	0.70875	0.149507	0.999503	protein_coding,protein_coding
XLOC_031070	XLOC_031070	ABCA12	85.2754	0.852754	chr2:214810228-215138626	TKS4_WT	TKS4_WT_T	1019.72	1889.29	0.889674	1019.72	1889.29	0.889671	0.526116	0.43845	0.35808	0.999503	protein_coding	chr2	214931542-215138626	-	ENSG00000144452.15
XLOC_048378	XLOC_048378	ABCA13	142156	1421.56	chr7:48171423-48647497	TKS4_WT	TKS4_WT_T	0	142.256		0.1	142.256	10.4743	0	1	0	1	protein_coding	chr7	48171458-48647497	+	ENSG00000179869.15
XLOC_055383	XLOC_055383	ABCA2	-44.8014	-0.448014	chr9:137007233-137037955	TKS4_WT	TKS4_WT_T	83725.5	46215.3	-0.857296	83725.5	46215.3	-0.857297	-0.663977	0.3506	0.455188	0.999503	protein_coding	chr9	137007234-137028915	-	ENSG00000107331.18
XLOC_019437	XLOC_019437	ABCA3	-63.4574	-0.634574	chr16:2275880-2340728	TKS4_WT	TKS4_WT_T	5547.53	2027.21	-1.45235	5547.53	2027.21	-1.45235	-1.07256	0.1393	0.856049	0.999503	protein_coding	chr16	2275881-2340746	-	ENSG00000167972.14
XLOC_003473	XLOC_003473	ABCA4	106.034	1.06034	chr1:93992833-94121148	TKS4_WT	TKS4_WT_T	204.381	421.094	1.04288	204.381	421.094	1.04288	0.480137	0.53095	0.274946	0.999503	protein_coding	chr1	93992834-94121148	-	ENSG00000198691.14
XLOC_022651	XLOC_022651	ABCA6,ABCA9	1362.02	13.6202	chr17:68974487-69141927	TKS4_WT	TKS4_WT_T	26.468	386.968	3.86989	26.468	386.968	3.86989	3.25724	0.1876	0.726767	0.999503	protein_coding,protein_coding
XLOC_024268	XLOC_024268	ABCA7	-3.75886	-0.0375886	chr19:1040106-1065572	TKS4_WT	TKS4_WT_T	42598	40996.8	-0.0552751	42598	40996.8	-0.0552744	-0.0494959	0.94595	0.0241318	0.999503	protein_coding	chr19	1039997-1065572	+	ENSG00000064687.13
XLOC_022650	XLOC_022650	ABCA8	55383.8	553.838	chr17:68817345-68955415	TKS4_WT	TKS4_WT_T	0	55.4838		0.1	55.4838	9.11592	0	1	0	1	protein_coding	chr17	68867289-68955392	-	ENSG00000141338.15
XLOC_050009	XLOC_050009	ABCB1	3.41093	0.0341093	chr7:87503016-87832296	TKS4_WT	TKS4_WT_T	3963.44	4098.63	0.0483888	3963.44	4098.63	0.0483886	0.0290524	0.9652	0.0153827	0.999503	protein_coding	chr7	87503017-87713323	-	ENSG00000085563.15
XLOC_004753	XLOC_004753	ABCB10	-14.3251	-0.143251	chr1:229516581-229558988	TKS4_WT	TKS4_WT_T	39660.4	33979	-0.223057	39660.4	33979	-0.223056	-0.233201	0.7414	0.129947	0.999503	protein_coding	chr1	229516582-229558707	-	ENSG00000135776.5
XLOC_030753	XLOC_030753	ABCB11	2.13314	0.0213314	chr2:168915467-169031396	TKS4_WT	TKS4_WT_T	26.468	27.0326	0.0304486	26.468	27.0326	0.0304511	0	1	0	1	protein_coding	chr2	168915498-169031324	-	ENSG00000073734.10
XLOC_050008	XLOC_050008	ABCB4	-99.84	-0.9984	chr7:87345645-87476722	TKS4_WT	TKS4_WT_T	62.4884	0		62.4884	0.1	-9.28744	0	1	0	1	protein_coding	chr7	87401696-87480435	-	ENSG00000005471.19
XLOC_048153	XLOC_048153	ABCB5	512.8	5.128	chr7:20615666-20757008	TKS4_WT	TKS4_WT_T	26.468	162.196	2.61541	26.468	162.196	2.61542	0	1	0	1	protein_coding	chr7	20615667-20777038	+	ENSG00000004846.17
XLOC_031125	XLOC_031125	ABCB6	61.5244	0.615244	chr2:219209771-219218958	TKS4_WT	TKS4_WT_T	15960	25779.3	0.691752	15960	25779.3	0.691752	0.671506	0.32775	0.484457	0.999503	protein_coding	chr2	219209772-219218994	-	ENSG00000115657.14
XLOC_057159	XLOC_057159	ABCB7	1.26833	0.0126833	chrX:75051047-75156283	TKS4_WT	TKS4_WT_T	32428.5	32839.8	0.0181821	32428.5	32839.8	0.018183	0.0181906	0.97895	0.00923949	0.999503	protein_coding	chrX	75051048-75156732	-	ENSG00000131269.19
XLOC_049269	XLOC_049269	ABCB8	-10.1137	-0.101137	chr7:151028449-151047782	TKS4_WT	TKS4_WT_T	22266.8	20014.8	-0.153823	22266.8	20014.8	-0.153827	-0.151461	0.8259	0.0830725	0.999503	protein_coding	chr7	151028422-151047782	+	ENSG00000197150.13
XLOC_012480	XLOC_012480	ABCB9	-9.5001	-0.095001	chr12:122917323-122982913	TKS4_WT	TKS4_WT_T	12492.5	11305.7	-0.144014	12492.5	11305.7	-0.144012	-0.0611906	0.89015	0.0505368	0.999503	protein_coding	chr12	122920951-122981649	-	ENSG00000150967.19
XLOC_018640	XLOC_018640	ABCC1	-15.2865	-0.152865	chr16:15949615-16143062	TKS4_WT	TKS4_WT_T	132005	111826	-0.239335	132005	111826	-0.239337	-0.25366	0.74785	0.126186	0.999503	protein_coding	chr16	15949138-16143257	+	ENSG00000103222.20
XLOC_043645	XLOC_043645	ABCC10	12.0746	0.120746	chr6:43427537-43456632	TKS4_WT	TKS4_WT_T	20991.1	23525.7	0.164456	20991.1	23525.7	0.16446	0.14763	0.8511	0.0700194	0.999503	protein_coding	chr6	43427366-43450427	+	ENSG00000124574.15
XLOC_019896	XLOC_019896	ABCC11	-5.40392	-0.0540392	chr16:48164841-48448435	TKS4_WT	TKS4_WT_T	906.878	857.871	-0.0801487	906.878	857.871	-0.0801478	-0.00664444	0.95555	0.0197466	0.999503	protein_coding	chr16	48165773-48247568	-	ENSG00000121270.16
XLOC_005739	XLOC_005739	ABCC2	-32.1457	-0.321457	chr10:99782601-99853741	TKS4_WT	TKS4_WT_T	107739	73105.5	-0.559483	107739	73105.5	-0.559489	-0.617731	0.3877	0.411504	0.999503	protein_coding	chr10	99782640-99852594	+	ENSG00000023839.12
XLOC_021279	XLOC_021279	ABCC3	0.0125121	0.000125121	chr17:50634880-50692253	TKS4_WT	TKS4_WT_T	12787.6	12789.2	0.000182059	12787.6	12789.2	0.0001805	0.000167619	0.9983	0.000738929	0.999508	protein_coding	chr17	50634777-50692253	+	ENSG00000108846.16
XLOC_013917	XLOC_013917	ABCC4	9.68168	0.0968168	chr13:95019828-95310895	TKS4_WT	TKS4_WT_T	102885	112846	0.133316	102885	112846	0.133323	0.145006	0.8364	0.077586	0.999503	protein_coding	chr13	95019835-95301475	-	ENSG00000125257.16
XLOC_037467	XLOC_037467	ABCC5	-33.2872	-0.332872	chr3:183919933-184018010	TKS4_WT	TKS4_WT_T	26756.2	17849.8	-0.583966	26756.2	17849.8	-0.583965	-0.574142	0.44715	0.349547	0.999503	protein_coding	chr3	183919934-184017939	-	ENSG00000114770.17
XLOC_019610	XLOC_019610	ABCC6	-32.9014	-0.329014	chr16:16149564-16223617	TKS4_WT	TKS4_WT_T	1452.36	974.513	-0.575644	1452.36	974.513	-0.575646	-0.419719	0.4728	0.325323	0.999503	protein_coding	chr16	16149565-16223522	-	ENSG00000091262.17
XLOC_008830	XLOC_008830	ABCC8	28351.2	283.512	chr11:17392497-17476849	TKS4_WT	TKS4_WT_T	0	28.4512		0.1	28.4512	8.15235	0	1	0	1	protein_coding	chr11	17392498-17476894	-	ENSG00000006071.16
XLOC_056616	XLOC_056616	ABCD1	-40.4221	-0.404221	chrX:153724850-153744755	TKS4_WT	TKS4_WT_T	6158.09	3668.86	-0.747149	6158.09	3668.86	-0.747151	-0.556143	0.43095	0.365573	0.999503	protein_coding	chrX	153724856-153744755	+	ENSG00000101986.12
XLOC_011711	XLOC_011711	ABCD2	-1.20271	-0.0120271	chr12:39530964-40106085	TKS4_WT	TKS4_WT_T	226.073	223.354	-0.0174568	226.073	223.354	-0.0174566	-0.00205703	0.9456	0.0242925	0.999503	protein_coding	chr12	39550033-39619803	-	ENSG00000173208.4
XLOC_001047	XLOC_001047	ABCD3	-2.52298	-0.0252298	chr1:94418085-94518663	TKS4_WT	TKS4_WT_T	137932	134452	-0.0368634	137932	134452	-0.036866	-0.0363898	0.9593	0.0180456	0.999503	protein_coding	chr1	94418389-94518666	+	ENSG00000117528.14
XLOC_015551	XLOC_015551	ABCD4	4.30776	0.0430776	chr14:74285268-74303062	TKS4_WT	TKS4_WT_T	10861.8	11329.7	0.0608448	10861.8	11329.7	0.0608465	0.0525181	0.92785	0.0325222	0.999503	protein_coding	chr14	74285269-74303055	-	ENSG00000119688.21
XLOC_038735	XLOC_038735	ABCE1	2.36351	0.0236351	chr4:144967116-145129524	TKS4_WT	TKS4_WT_T	377405	386325	0.0337033	377405	386325	0.0337015	0.0264614	0.96915	0.013609	0.999503	protein_coding	chr4	145098288-145129524	+	ENSG00000164163.11
XLOC_043409	XLOC_043409	ABCF1	-11.5043	-0.115043	chr6:30571441-30591522	TKS4_WT	TKS4_WT_T	67140.4	59416.4	-0.176319	67140.4	59416.4	-0.17632	-0.197137	0.78665	0.104218	0.999503	protein_coding	chr6	30571393-30597179	+	ENSG00000204574.14
XLOC_050523	XLOC_050523	ABCF2,ABCF2-H2BE1,H2BE1	31.7186	0.317186	chr7:151207836-151227205	TKS4_WT	TKS4_WT_T	122190	160947	0.397457	122190	160947	0.397459	0.414953	0.56745	0.246072	0.999503	protein_coding,protein_coding,protein_coding
XLOC_036037	XLOC_036037	ABCF3	-10.6618	-0.106618	chr3:184186074-184194012	TKS4_WT	TKS4_WT_T	45576.7	40717.4	-0.162653	45576.7	40717.4	-0.162651	-0.17646	0.80265	0.0954738	0.999503	protein_coding	chr3	184186095-184194012	+	ENSG00000161204.12
XLOC_032948	XLOC_032948	ABCG1	35.7827	0.357827	chr21:42199688-42304387	TKS4_WT	TKS4_WT_T	1175.54	1596.18	0.441305	1175.54	1596.18	0.4413	0.290013	0.5728	0.241997	0.999503	protein_coding	chr21	42199689-42297244	+	ENSG00000160179.19
XLOC_039606	XLOC_039606	ABCG2	117.556	1.17556	chr4:88090263-88231626	TKS4_WT	TKS4_WT_T	3745.13	8147.76	1.12139	3745.13	8147.76	1.12139	0.957086	0.1227	0.911155	0.999503	protein_coding	chr4	88090150-88231628	-	ENSG00000118777.12
XLOC_008381	XLOC_008381	ABCG4	-31.4958	-0.314958	chr11:119149051-119162666	TKS4_WT	TKS4_WT_T	3293.58	2256.24	-0.545738	3293.58	2256.24	-0.545736	-0.375911	0.60655	0.217133	0.999503	protein_coding	chr11	119149052-119162653	+	ENSG00000172350.10
XLOC_027922	XLOC_027922	ABCG8	264.244	2.64244	chr2:43774038-43882988	TKS4_WT	TKS4_WT_T	31.2442	113.805	1.8649	31.2442	113.805	1.8649	0	1	0	1	protein_coding	chr2	43831942-43882988	+	ENSG00000143921.9
XLOC_027793	XLOC_027793	ABHD1	47.1893	0.471893	chr2:27123779-27134642	TKS4_WT	TKS4_WT_T	526.774	775.355	0.557673	526.774	775.355	0.557673	0.0480935	0.66055	0.180094	0.999503	protein_coding	chr2	27123789-27130812	+	ENSG00000143994.14
XLOC_035502	XLOC_035502	ABHD10	21.5138	0.215138	chr3:111979025-111993368	TKS4_WT	TKS4_WT_T	406460	493905	0.281121	406460	493905	0.28112	0.230364	0.74215	0.129508	0.999503	protein_coding	chr3	111979010-111993368	+	ENSG00000144827.9
XLOC_049920	XLOC_049920	ABHD11	-31.259	-0.31259	chr7:73736093-73738867	TKS4_WT	TKS4_WT_T	41859.3	28774.5	-0.540757	41859.3	28774.5	-0.540757	-0.587984	0.4468	0.349887	0.999503	protein_coding	chr7	73736094-73738852	-	ENSG00000106077.19
XLOC_032238	XLOC_032238	ABHD12	-3.90956	-0.0390956	chr20:25248038-25390835	TKS4_WT	TKS4_WT_T	19076.3	18330.5	-0.0575311	19076.3	18330.5	-0.0575352	-0.0233953	0.9663	0.014888	0.999503	protein_coding	chr20	25294742-25390835	-	ENSG00000100997.20
XLOC_013311	XLOC_013311	ABHD13	22.6521	0.226521	chr13:108218391-108235440	TKS4_WT	TKS4_WT_T	16466.5	20196.5	0.294572	16466.5	20196.5	0.294571	0.300274	0.66265	0.178716	0.999503	protein_coding	chr13	108218392-108234243	+	ENSG00000139826.6
XLOC_035162	XLOC_035162	ABHD14A,ABHD14A-ACY1,ACY1	-9.11828	-0.0911828	chr3:51975063-51989197	TKS4_WT	TKS4_WT_T	18003.4	16361.8	-0.13794	18003.4	16361.8	-0.137938	-0.139275	0.8481	0.0715529	0.999503	protein_coding,protein_coding,protein_coding
XLOC_036598	XLOC_036598	ABHD14B	39.1989	0.391989	chr3:51968509-51974630	TKS4_WT	TKS4_WT_T	20744.2	28875.7	0.47715	20744.2	28875.7	0.477148	0.505372	0.5115	0.291154	0.999503	protein_coding	chr3	51968510-51983409	-	ENSG00000114779.20
XLOC_022043	XLOC_022043	ABHD15	6.47058	0.0647058	chr17:29560546-29567037	TKS4_WT	TKS4_WT_T	13045.2	13889.3	0.0904611	13045.2	13889.3	0.0904548	0.0904566	0.89055	0.0503417	0.999503	protein_coding	chr17	29560547-29567037	-	ENSG00000168792.5
XLOC_044896	XLOC_044896	ABHD16A	24.9931	0.249931	chr6:31682894-31703324	TKS4_WT	TKS4_WT_T	17022.7	21277.2	0.32185	17022.7	21277.2	0.321848	0.334463	0.6537	0.184622	0.999503	protein_coding	chr6	31686955-31703356	-	ENSG00000204427.12
XLOC_031979	XLOC_031979	ABHD16B	-15.1362	-0.151362	chr20:63861214-63865073	TKS4_WT	TKS4_WT_T	930.361	789.54	-0.236777	930.361	789.54	-0.236778	-0.0641225	0.9094	0.0412451	0.999503	protein_coding	chr20	63861498-63862988	+	ENSG00000183260.7
XLOC_025515	XLOC_025515	ABHD17A	-10.7494	-0.107494	chr19:1876809-1885519	TKS4_WT	TKS4_WT_T	74785.9	66746.9	-0.164065	74785.9	66746.9	-0.164065	-0.181351	0.7978	0.098106	0.999503	protein_coding	chr19	1876810-1885496	-	ENSG00000129968.17
XLOC_054760	XLOC_054760	ABHD17B	3.379	0.03379	chr9:71862451-71911536	TKS4_WT	TKS4_WT_T	23279.1	24065.7	0.0479415	23279.1	24065.7	0.0479431	0.0478079	0.9487	0.0228711	0.999503	protein_coding	chr9	71862452-71911193	-	ENSG00000107362.14
XLOC_016921	XLOC_016921	ABHD17C	-16.8421	-0.168421	chr15:80695309-80755621	TKS4_WT	TKS4_WT_T	25408.9	21129.5	-0.266077	25408.9	21129.5	-0.266075	-0.269521	0.70615	0.151103	0.999503	protein_coding	chr15	80679684-80755621	+	ENSG00000136379.12
XLOC_038660	XLOC_038660	ABHD18	-32.255	-0.32255	chr4:127917731-128039953	TKS4_WT	TKS4_WT_T	19100	12939.3	-0.561809	19100	12939.3	-0.561813	-0.436669	0.45725	0.339846	0.999503	protein_coding	chr4	127965306-128039953	+	ENSG00000164074.16
XLOC_017000	XLOC_017000	ABHD2	-4.15592	-0.0415592	chr15:89088421-89202355	TKS4_WT	TKS4_WT_T	72284.8	69280.7	-0.0612391	72284.8	69280.7	-0.0612388	-0.0677789	0.922	0.0352691	0.999503	protein_coding	chr15	89087459-89202355	+	ENSG00000140526.18
XLOC_023853	XLOC_023853	ABHD3	-11.392	-0.11392	chr18:21650896-21704793	TKS4_WT	TKS4_WT_T	30547.7	27067.7	-0.174493	30547.7	27067.7	-0.174491	-0.18368	0.7937	0.100344	0.999503	protein_coding	chr18	21650901-21704780	-	ENSG00000158201.10
XLOC_014211	XLOC_014211	ABHD4	39.0577	0.390577	chr14:22598237-22612864	TKS4_WT	TKS4_WT_T	7246.27	10076.5	0.475678	7246.27	10076.5	0.475684	0.400887	0.5925	0.227312	0.999503	protein_coding	chr14	22598290-22612963	+	ENSG00000100439.11
XLOC_035046	XLOC_035046	ABHD5	-1.31643	-0.0131643	chr3:43365847-43734371	TKS4_WT	TKS4_WT_T	34563.1	34108.1	-0.0191163	34563.1	34108.1	-0.0191182	-0.0163441	0.9828	0.00753485	0.999503	protein_coding	chr3	43690108-43734371	+	ENSG00000011198.10
XLOC_035218	XLOC_035218	ABHD6	-1.01054	-0.0101054	chr3:58237531-58294736	TKS4_WT	TKS4_WT_T	14942.5	14791.5	-0.0146552	14942.5	14791.5	-0.0146532	-0.0130817	0.9876	0.00541892	0.999503	protein_coding	chr3	58237532-58295693	+	ENSG00000163686.15
XLOC_025840	XLOC_025840	ABHD8	-53.9273	-0.539273	chr19:17292130-17306843	TKS4_WT	TKS4_WT_T	2562.82	1180.76	-1.11801	2562.82	1180.76	-1.11802	-0.317553	0.72825	0.13772	0.999503	protein_coding	chr19	17292131-17310236	-	ENSG00000127220.6
XLOC_006244	XLOC_006244	ABI1	4.51612	0.0451612	chr10:26697423-26860986	TKS4_WT	TKS4_WT_T	34866.2	36440.8	0.0637274	34866.2	36440.8	0.0637255	0.0499634	0.9487	0.0228711	0.999503	protein_coding	chr10	26746593-26861087	-	ENSG00000136754.18
XLOC_029092	XLOC_029092	ABI2	-30.5729	-0.305729	chr2:203325012-203432169	TKS4_WT	TKS4_WT_T	94653	65714.8	-0.52643	94653	65714.8	-0.52643	-0.583005	0.37255	0.428815	0.999503	protein_coding	chr2	203328280-203447728	+	ENSG00000138443.17
XLOC_021252	XLOC_021252	ABI3	-99.6799	-0.996799	chr17:49210581-49223225	TKS4_WT	TKS4_WT_T	31.2442	0		31.2442	0.1	-8.28744	0	1	0	1	protein_coding	chr17	49210411-49223225	+	ENSG00000108798.9
XLOC_036842	XLOC_036842	ABI3BP	26.8216	0.268216	chr3:100749155-100993508	TKS4_WT	TKS4_WT_T	151.445	192.065	0.342806	151.445	192.065	0.342801	0.0819524	0.55905	0.252549	0.999503	protein_coding	chr3	100749156-100993515	-	ENSG00000154175.18
XLOC_053956	XLOC_053956	ABITRAM	20.3526	0.203526	chr9:108934396-109013535	TKS4_WT	TKS4_WT_T	13626.3	16399.6	0.267268	13626.3	16399.6	0.267267	0.0808087	0.9223	0.0351278	0.999503	protein_coding	chr9	108934400-108950744	+	ENSG00000119328.12
XLOC_054157	XLOC_054157	ABL1	-4.49306	-0.0449306	chr9:130713880-130887675	TKS4_WT	TKS4_WT_T	70297.3	67138.8	-0.0663208	70297.3	67138.8	-0.0663225	-0.0649147	0.92655	0.0331311	0.999503	protein_coding	chr9	130713016-130887675	+	ENSG00000097007.19
XLOC_004296	XLOC_004296	ABL2	-2.31463	-0.0231463	chr1:179099329-179229693	TKS4_WT	TKS4_WT_T	98853.9	96565.8	-0.033785	98853.9	96565.8	-0.0337856	-0.0381673	0.95895	0.018204	0.999503	protein_coding	chr1	179099330-179229684	-	ENSG00000143322.21
XLOC_006934	XLOC_006934	ABLIM1	5.68919	0.0568919	chr10:114431109-114821643	TKS4_WT	TKS4_WT_T	341015	360416	0.0798288	341015	360416	0.0798279	0.0762316	0.9087	0.0415795	0.999503	protein_coding	chr10	114431112-114768061	-	ENSG00000099204.21
XLOC_039121	XLOC_039121	ABLIM2	-75.6364	-0.756364	chr4:7965311-8158813	TKS4_WT	TKS4_WT_T	2995.46	729.801	-2.0372	2995.46	729.801	-2.0372	-1.49725	0.0012	2.92082	0.255861	protein_coding	chr4	7965310-8158832	-	ENSG00000163995.21
XLOC_041259	XLOC_041259	ABLIM3	-16.4074	-0.164074	chr5:149141492-149260542	TKS4_WT	TKS4_WT_T	13642	11403.7	-0.258547	13642	11403.7	-0.258553	-0.23266	0.7729	0.111877	0.999503	protein_coding	chr5	149141483-149260542	+	ENSG00000173210.20
XLOC_055311	XLOC_055311	ABO	58.2211	0.582211	chr9:133250400-133275201	TKS4_WT	TKS4_WT_T	124.977	197.74	0.661943	124.977	197.74	0.661942	0.441224	0.34035	0.468074	0.999503	protein_coding	chr9	133233278-133276024	-	ENSG00000175164.16
XLOC_021659	XLOC_021659	ABR	-42.6641	-0.426641	chr17:997128-1229722	TKS4_WT	TKS4_WT_T	60141.5	34482.7	-0.802488	60141.5	34482.7	-0.802488	-0.550406	0.50615	0.295721	0.999503	protein_coding	chr17	1003519-1229738	-	ENSG00000159842.16
XLOC_052588	XLOC_052588	ABRA	28351.2	283.512	chr8:106759482-106809073	TKS4_WT	TKS4_WT_T	0	28.4512		0.1	28.4512	8.15235	0	1	0	1	protein_coding	chr8	106759483-106770244	-	ENSG00000174429.4
XLOC_044209	XLOC_044209	ABRACL	13.2949	0.132949	chr6:139028744-139043302	TKS4_WT	TKS4_WT_T	17792.5	20158	0.180081	17792.5	20158	0.180083	0.182007	0.7977	0.0981604	0.999503	protein_coding	chr6	139028745-139043302	+	ENSG00000146386.8
XLOC_039578	XLOC_039578	ABRAXAS1	-42.6007	-0.426007	chr4:83456057-83485137	TKS4_WT	TKS4_WT_T	23256.4	13349	-0.800901	23256.4	13349	-0.800896	-0.25068	0.64815	0.188324	0.999503	protein_coding	chr4	83459517-83523348	-	ENSG00000163322.14
XLOC_005955	XLOC_005955	ABRAXAS2	3.50085	0.0350085	chr10:124801802-124836670	TKS4_WT	TKS4_WT_T	54475.4	56382.5	0.0496428	54475.4	56382.5	0.0496426	0.0519484	0.94385	0.025097	0.999503	protein_coding	chr10	124801819-124836667	+	ENSG00000165660.8
XLOC_043238	XLOC_043238	ABT1	39.1204	0.391204	chr6:26596952-26600739	TKS4_WT	TKS4_WT_T	60714.9	84466.8	0.476334	60714.9	84466.8	0.476334	0.492496	0.49805	0.302727	0.999503	protein_coding	chr6	26596953-26600739	+	ENSG00000146109.5
XLOC_035653	XLOC_035653	ABTB1	14.1031	0.141031	chr3:127672927-127680926	TKS4_WT	TKS4_WT_T	5581.77	6368.97	0.190339	5581.77	6368.97	0.190337	0.130116	0.85585	0.0676023	0.999503	protein_coding	chr3	127672935-127680926	+	ENSG00000114626.18
XLOC_008941	XLOC_008941	ABTB2	-5.19789	-0.0519789	chr11:34150986-34358010	TKS4_WT	TKS4_WT_T	13628.6	12920.2	-0.0770182	13628.6	12920.2	-0.077009	-0.0645527	0.9252	0.0337644	0.999503	protein_coding	chr11	34150987-34358010	-	ENSG00000166016.6
XLOC_036413	XLOC_036413	ACAA1	18.7942	0.187942	chr3:38038594-38137127	TKS4_WT	TKS4_WT_T	14900.9	17701.4	0.248462	14900.9	17701.4	0.248464	0.202283	0.76795	0.114667	0.999503	protein_coding	chr3	38103129-38137242	-	ENSG00000060971.19
XLOC_024025	XLOC_024025	ACAA2	15.1777	0.151777	chr18:49782163-49813533	TKS4_WT	TKS4_WT_T	9723.32	11199.1	0.203867	9723.32	11199.1	0.203862	0.186347	0.7812	0.107238	0.999503	protein_coding	chr18	49782164-49813953	-	ENSG00000167315.18
XLOC_022145	XLOC_022145	ACACA	-22	-0.22	chr17:37084991-37406836	TKS4_WT	TKS4_WT_T	225432	175837	-0.358449	225432	175837	-0.358454	-0.374012	0.5634	0.249183	0.999503	protein_coding	chr17	37084992-37406836	-	ENSG00000278540.5
XLOC_011099	XLOC_011099	ACACB	-50.2306	-0.502306	chr12:109112665-109268226	TKS4_WT	TKS4_WT_T	8949.57	4454.15	-1.00667	8949.57	4454.15	-1.00667	-0.846966	0.21025	0.677264	0.999503	protein_coding	chr12	109116587-109268226	+	ENSG00000076555.16
XLOC_011123	XLOC_011123	ACAD10	-20.3299	-0.203299	chr12:111686052-111757099	TKS4_WT	TKS4_WT_T	16681.8	13290.4	-0.32789	16681.8	13290.4	-0.32789	-0.329151	0.6547	0.183958	0.999503	protein_coding	chr12	111686053-111757107	+	ENSG00000111271.15
XLOC_037095	XLOC_037095	ACAD11,NPHP3,NPHP3-ACAD11	-13.061	-0.13061	chr3:132558137-132874211	TKS4_WT	TKS4_WT_T	28209.9	24525.4	-0.201926	28209.9	24525.4	-0.201925	-0.128053	0.904	0.0438316	0.999503	protein_coding,protein_coding,protein_coding
XLOC_008534	XLOC_008534	ACAD8	5.74924	0.0574924	chr11:134253537-134265858	TKS4_WT	TKS4_WT_T	24561.5	25973.6	0.0806445	24561.5	25973.6	0.0806473	0.0820866	0.9137	0.0391964	0.999503	protein_coding	chr11	134253548-134265855	+	ENSG00000151498.12
XLOC_035667	XLOC_035667	ACAD9	41.6668	0.416668	chr3:128879595-129040742	TKS4_WT	TKS4_WT_T	35480.3	50263.8	0.502503	35480.3	50263.8	0.502502	0.488759	0.51435	0.288741	0.999503	protein_coding	chr3	128879596-128924003	+	ENSG00000177646.20
XLOC_000901	XLOC_000901	ACADM	-13.9312	-0.139312	chr1:75724708-75763679	TKS4_WT	TKS4_WT_T	31630.5	27224	-0.216435	31630.5	27224	-0.216437	-0.218318	0.75975	0.119329	0.999503	protein_coding	chr1	75724431-75787575	+	ENSG00000117054.15
XLOC_011205	XLOC_011205	ACADS	55.0941	0.550941	chr12:120725825-120740008	TKS4_WT	TKS4_WT_T	11996.2	18605.4	0.633142	11996.2	18605.4	0.633144	0.631366	0.36175	0.441591	0.999503	protein_coding	chr12	120725774-120740008	+	ENSG00000122971.9
XLOC_005941	XLOC_005941	ACADSB	-27.4367	-0.274367	chr10:123009005-123058290	TKS4_WT	TKS4_WT_T	45796.3	33231.3	-0.462689	45796.3	33231.3	-0.462688	-0.495379	0.4832	0.315873	0.999503	protein_coding	chr10	123008979-123058290	+	ENSG00000196177.13
XLOC_020607	XLOC_020607	ACADVL	27.3213	0.273213	chr17:7187179-7225267	TKS4_WT	TKS4_WT_T	81378.4	103612	0.348479	81378.4	103612	0.348473	0.363669	0.57765	0.238335	0.999503	protein_coding	chr17	7217125-7225266	+	ENSG00000072778.20
XLOC_020611	XLOC_020611	ACAP1,KCTD11	25.8425	0.258425	chr17:7336505-7354944	TKS4_WT	TKS4_WT_T	5865.95	7381.86	0.331621	5865.95	7381.86	0.33162	0.268799	0.7137	0.146484	0.999503	protein_coding,protein_coding
XLOC_037575	XLOC_037575	ACAP2	-7.15022	-0.0715022	chr3:195274741-195443176	TKS4_WT	TKS4_WT_T	109605	101768	-0.107039	109605	101768	-0.10703	-0.112721	0.88235	0.0543591	0.999503	protein_coding	chr3	195274745-195443044	-	ENSG00000114331.16
XLOC_002514	XLOC_002514	ACAP3,SNORD167	-29.688	-0.29688	chr1:1292383-1307930	TKS4_WT	TKS4_WT_T	16404.6	11534.4	-0.508157	16404.6	11534.4	-0.508157	-0.453307	0.5047	0.296967	0.999503	protein_coding,-
XLOC_008269	XLOC_008269	ACAT1	-20.5675	-0.205675	chr11:108116704-108148822	TKS4_WT	TKS4_WT_T	70392	55914.1	-0.3322	70392	55914.1	-0.332199	-0.348301	0.60095	0.221162	0.999503	protein_coding	chr11	108116695-108147603	+	ENSG00000075239.14
XLOC_044357	XLOC_044357	ACAT2	-23.2737	-0.232737	chr6:159669068-159789602	TKS4_WT	TKS4_WT_T	55355.2	42472	-0.382207	55355.2	42472	-0.382207	-0.0720992	0.8471	0.0720653	0.999503	protein_coding	chr6	159762045-159779112	+	ENSG00000120437.9
XLOC_004686	XLOC_004686	ACBD3	-1.96139	-0.0196139	chr1:226144678-226186741	TKS4_WT	TKS4_WT_T	39966.5	39182.6	-0.028579	39966.5	39182.6	-0.0285781	-0.0310192	0.9619	0.0168701	0.999503	protein_coding	chr1	226144679-226186741	-	ENSG00000182827.9
XLOC_021182	XLOC_021182	ACBD4	-21.5965	-0.215965	chr17:45132599-45144181	TKS4_WT	TKS4_WT_T	3440.24	2697.27	-0.351012	3440.24	2697.27	-0.351009	-0.2596	0.6529	0.185153	0.999503	protein_coding	chr17	45132600-45144181	+	ENSG00000181513.15
XLOC_006249	XLOC_006249	ACBD5	19.5059	0.195059	chr10:27110110-27243542	TKS4_WT	TKS4_WT_T	30923.4	36955.3	0.257081	30923.4	36955.3	0.257082	0.0776438	0.73575	0.13327	0.999503	protein_coding	chr10	27168135-27243046	-	ENSG00000107897.20
XLOC_004308	XLOC_004308	ACBD6,LHX4-AS1	-10.705	-0.10705	chr1:180228371-180502577	TKS4_WT	TKS4_WT_T	36756.5	32821.7	-0.163349	36756.5	32821.7	-0.163349	-0.159683	0.82925	0.0813145	0.999503	protein_coding,-
XLOC_006176	XLOC_006176	ACBD7,ACBD7-DCLRE1CP1,DCLRE1CP1	-5.03951	-0.0503951	chr10:15015071-15088776	TKS4_WT	TKS4_WT_T	7749.96	7359.4	-0.0745991	7749.96	7359.4	-0.0746007	-0.0637222	0.9286	0.0321713	0.999503	protein_coding,-,unprocessed_pseudogene
XLOC_007526	XLOC_007526	ACCS	12.7751	0.127751	chr11:44066117-44084237	TKS4_WT	TKS4_WT_T	4400.06	4962.17	0.173449	4400.06	4962.17	0.173448	0.138838	0.82085	0.0857362	0.999503	protein_coding	chr11	44065925-44084237	+	ENSG00000110455.14
XLOC_007525	XLOC_007525	ACCSL	-99.6799	-0.996799	chr11:44047980-44059977	TKS4_WT	TKS4_WT_T	31.2442	0		31.2442	0.1	-8.28744	0	1	0	1	protein_coding	chr11	44047981-44059977	+	ENSG00000205126.2
XLOC_020054	XLOC_020054	ACD	-4.37634	-0.0437634	chr16:67645003-67660832	TKS4_WT	TKS4_WT_T	21303.2	20370.9	-0.0645585	21303.2	20370.9	-0.0645604	-0.0550942	0.93865	0.0274963	0.999503	protein_coding	chr16	67657512-67660810	-	ENSG00000102977.18
XLOC_021393	XLOC_021393	ACE	44.4536	0.444536	chr17:63477060-63498373	TKS4_WT	TKS4_WT_T	1896.74	2739.91	0.530603	1896.74	2739.91	0.530607	0.345563	0.57115	0.24325	0.999503	protein_coding	chr17	63477061-63498380	+	ENSG00000159640.17
XLOC_056745	XLOC_056745	ACE2	26932.6	269.326	chrX:15500776-15602158	TKS4_WT	TKS4_WT_T	0	27.0326		0.1	27.0326	8.07856	0	1	0	1	protein_coding	chrX	15494566-15607236	-	ENSG00000130234.13
XLOC_053315	XLOC_053315	ACER2	24.1151	0.241151	chr9:19408926-19455173	TKS4_WT	TKS4_WT_T	11266.4	13983.3	0.311679	11266.4	13983.3	0.311678	0.314724	0.654	0.184422	0.999503	protein_coding	chr9	19409009-19452505	+	ENSG00000177076.6
XLOC_008067	XLOC_008067	ACER3	-23.9044	-0.239044	chr11:76860887-77026797	TKS4_WT	TKS4_WT_T	51590.6	39258.2	-0.394114	51590.6	39258.2	-0.394114	-0.394111	0.567	0.246417	0.999503	protein_coding	chr11	76860859-77026797	+	ENSG00000078124.13
XLOC_050139	XLOC_050139	ACHE	158.449	1.58449	chr7:100889993-100896994	TKS4_WT	TKS4_WT_T	1404.2	3629.14	1.36988	1404.2	3629.14	1.36988	1.08903	0.0654	1.18442	0.999503	protein_coding	chr7	100889994-100896974	-	ENSG00000087085.16
XLOC_015136	XLOC_015136	ACIN1	-0.414255	-0.00414255	chr14:23057659-23104989	TKS4_WT	TKS4_WT_T	124561	124045	-0.00598755	124561	124045	-0.00598885	-0.00521548	0.9945	0.00239521	0.999503	protein_coding	chr14	23058564-23095614	-	ENSG00000100813.15
XLOC_035036	XLOC_035036	ACKR2	56.2737	0.562737	chr3:42809444-42867286	TKS4_WT	TKS4_WT_T	213.933	334.321	0.644075	213.933	334.321	0.644075	0.346064	0.62085	0.207013	0.999503	protein_coding	chr3	42804752-42887974	+	ENSG00000144648.16
XLOC_035711	XLOC_035711	ACKR4	-22.8587	-0.228587	chr3:132558137-132874211	TKS4_WT	TKS4_WT_T	324.581	250.386	-0.374425	324.581	250.386	-0.374425	-0.0256579	0.8434	0.0739664	0.999503	protein_coding	chr3	132597270-132618967	+	ENSG00000129048.7
XLOC_022280	XLOC_022280	ACLY	-27.0092	-0.270092	chr17:41866915-41930542	TKS4_WT	TKS4_WT_T	402725	293952	-0.454212	402725	293952	-0.454214	-0.426701	0.55765	0.253638	0.999503	protein_coding	chr17	41866917-41930542	-	ENSG00000131473.17
XLOC_028671	XLOC_028671	ACMSD	-99.8111	-0.998111	chr2:134838318-134918606	TKS4_WT	TKS4_WT_T	52.9361	0		52.9361	0.1	-9.04811	0	1	0	1	protein_coding	chr2	134838616-134902034	+	ENSG00000153086.14
XLOC_053376	XLOC_053376	ACO1	-13.7664	-0.137664	chr9:32384642-32454769	TKS4_WT	TKS4_WT_T	64828	55903.5	-0.213676	64828	55903.5	-0.213678	-0.23598	0.74105	0.130152	0.999503	protein_coding	chr9	32384603-32454769	+	ENSG00000122729.19
XLOC_033816	XLOC_033816	ACO2	8.49935	0.0849935	chr22:41468755-41544606	TKS4_WT	TKS4_WT_T	99515.8	107974	0.117687	99515.8	107974	0.117686	0.0847574	0.90635	0.0427041	0.999503	protein_coding	chr22	41447830-41529273	+	ENSG00000100412.17
XLOC_014617	XLOC_014617	ACOT1,RIOX1	19.9801	0.199801	chr14:73478483-73558947	TKS4_WT	TKS4_WT_T	4854.39	5824.3	0.262794	4854.39	5824.3	0.262795	0.228749	0.74045	0.130504	0.999503	protein_coding,protein_coding
XLOC_000766	XLOC_000766	ACOT11	-26.3315	-0.263315	chr1:54548227-54639192	TKS4_WT	TKS4_WT_T	17264.1	12718.2	-0.440877	17264.1	12718.2	-0.440881	-0.380696	0.59965	0.222102	0.999503	protein_coding	chr1	54542257-54639192	+	ENSG00000162390.18
XLOC_043165	XLOC_043165	ACOT13	-17.6302	-0.176302	chr6:24667076-24720920	TKS4_WT	TKS4_WT_T	16634.5	13701.8	-0.279807	16634.5	13701.8	-0.279813	-0.0909337	0.9224	0.0350807	0.999503	protein_coding	chr6	24667035-24705065	+	ENSG00000112304.11
XLOC_002581	XLOC_002581	ACOT7	-14.7247	-0.147247	chr1:6264271-6393767	TKS4_WT	TKS4_WT_T	85081.5	72553.5	-0.229802	85081.5	72553.5	-0.2298	-0.234419	0.73535	0.133506	0.999503	protein_coding	chr1	6264269-6393767	-	ENSG00000097021.20
XLOC_032452	XLOC_032452	ACOT8	68.4867	0.684867	chr20:45833417-45857405	TKS4_WT	TKS4_WT_T	5890.43	9924.59	0.752634	5890.43	9924.59	0.752635	0.50846	0.45935	0.337856	0.999503	protein_coding	chr20	45841721-45857405	-	ENSG00000101473.17
XLOC_056793	XLOC_056793	ACOT9	0.345822	0.00345822	chrX:23701054-23743276	TKS4_WT	TKS4_WT_T	56300.7	56495.4	0.00498168	56300.7	56495.4	0.00498054	0.00516168	0.99275	0.0031601	0.999503	protein_coding	chrX	23701055-23766475	-	ENSG00000123130.17
XLOC_022724	XLOC_022724	ACOX1	19.5857	0.195857	chr17:75941506-75979199	TKS4_WT	TKS4_WT_T	109090	130456	0.258042	109090	130456	0.258044	0.269512	0.69815	0.156051	0.999503	protein_coding	chr17	75941507-75979177	-	ENSG00000161533.12
XLOC_036663	XLOC_036663	ACOX2	-50.3533	-0.503533	chr3:58505135-58706084	TKS4_WT	TKS4_WT_T	4478.87	2223.61	-1.01023	4478.87	2223.61	-1.01023	-0.804836	0.24195	0.616274	0.999503	protein_coding	chr3	58505136-58537283	-	ENSG00000168306.13
XLOC_039125	XLOC_039125	ACOX3	-12.367	-0.12367	chr4:8366262-8440723	TKS4_WT	TKS4_WT_T	14190.2	12435.3	-0.190458	14190.2	12435.3	-0.190454	-0.185818	0.81575	0.0884429	0.999503	protein_coding	chr4	8366282-8440723	-	ENSG00000087008.16
XLOC_028462	XLOC_028462	ACOXL	-23.2868	-0.232868	chr2:110732538-111120610	TKS4_WT	TKS4_WT_T	4573.2	3508.25	-0.382453	4573.2	3508.25	-0.382452	-0.325895	0.5587	0.252821	0.999503	protein_coding	chr2	110732539-111120610	+	ENSG00000153093.20
XLOC_027600	XLOC_027600	ACP1	5.21475	0.0521475	chr2:264946-278283	TKS4_WT	TKS4_WT_T	126564	133164	0.0733432	126564	133164	0.073337	0.0622803	0.9357	0.0288634	0.999503	protein_coding	chr2	264140-278283	+	ENSG00000143727.16
XLOC_009012	XLOC_009012	ACP2	75.5955	0.755955	chr11:47239301-47269033	TKS4_WT	TKS4_WT_T	11906.4	20907.1	0.812249	11906.4	20907.1	0.812256	0.650692	0.3568	0.447575	0.999503	protein_coding	chr11	47239302-47248906	-	ENSG00000134575.13
XLOC_035707	XLOC_035707	ACP3	183.5	1.835	chr3:132317402-132368765	TKS4_WT	TKS4_WT_T	57.7122	163.614	1.50335	57.7122	163.614	1.50335	0	1	0	1	protein_coding	chr3	132317369-132368298	+	ENSG00000014257.16
XLOC_025725	XLOC_025725	ACP5	264.244	2.64244	chr19:11574659-11619161	TKS4_WT	TKS4_WT_T	31.2442	113.805	1.8649	31.2442	113.805	1.8649	0	1	0	1	protein_coding	chr19	11574653-11579993	-	ENSG00000102575.14
XLOC_003799	XLOC_003799	ACP6	-25.4453	-0.254453	chr1:147541500-147670524	TKS4_WT	TKS4_WT_T	12498.9	9318.52	-0.423626	12498.9	9318.52	-0.423628	-0.233712	0.6959	0.157453	0.999503	protein_coding	chr1	147629652-147670524	-	ENSG00000162836.12
XLOC_024923	XLOC_024923	ACP7	20.6839	0.206839	chr19:39083010-39112074	TKS4_WT	TKS4_WT_T	2952.88	3563.65	0.271235	2952.88	3563.65	0.271233	0.214469	0.7538	0.122744	0.999503	protein_coding	chr19	39083913-39111493	+	ENSG00000183760.11
XLOC_033925	XLOC_033925	ACR	-99.9522	-0.999522	chr22:50738203-50745339	TKS4_WT	TKS4_WT_T	209.157	0		209.157	0.1	-11.0304		0.0149	1.82681	0.999503	protein_coding	chr22	50738196-50745339	+	ENSG00000100312.11
XLOC_011421	XLOC_011421	ACRBP	-11.2093	-0.112093	chr12:6638074-6647432	TKS4_WT	TKS4_WT_T	124.977	110.968	-0.171521	124.977	110.968	-0.171519	-0.0989847	0.4478	0.348916	0.999503	protein_coding	chr12	6638075-6647433	-	ENSG00000111644.8
XLOC_017775	XLOC_017775	ACSBG1	-41.4977	-0.414977	chr15:78149361-78234625	TKS4_WT	TKS4_WT_T	2137.54	1250.51	-0.773432	2137.54	1250.51	-0.773435	-0.123111	0.513	0.289883	0.999503	protein_coding	chr15	78167468-78245688	-	ENSG00000103740.10
XLOC_024368	XLOC_024368	ACSBG2	147.586	1.47586	chr19:6125425-6199571	TKS4_WT	TKS4_WT_T	168.361	416.838	1.30793	168.361	416.838	1.30793	0.446714	0.03965	1.40176	0.999503	protein_coding	chr19	6135247-6193094	+	ENSG00000130377.14
XLOC_021273	XLOC_021273	ACSF2	-9.50315	-0.0950315	chr17:50426217-50474845	TKS4_WT	TKS4_WT_T	9315.75	8430.46	-0.14406	9315.75	8430.46	-0.144061	-0.126547	0.85695	0.0670445	0.999503	protein_coding	chr17	50426158-50474845	+	ENSG00000167107.13
XLOC_019330	XLOC_019330	ACSF3,LINC00304	-47.2508	-0.472508	chr16:89093846-89163675	TKS4_WT	TKS4_WT_T	42730.5	22540	-0.922777	42730.5	22540	-0.922779	-0.990191	0.2228	0.652085	0.999503	protein_coding,lncRNA
XLOC_040156	XLOC_040156	ACSL1	-13.1895	-0.131895	chr4:184755594-184826593	TKS4_WT	TKS4_WT_T	22761.3	19759.2	-0.204055	22761.3	19759.2	-0.204058	-0.20484	0.778	0.10902	0.999503	protein_coding	chr4	184755595-184826818	-	ENSG00000151726.15
XLOC_029257	XLOC_029257	ACSL3	-26.1845	-0.261845	chr2:222861035-222944639	TKS4_WT	TKS4_WT_T	146392	108060	-0.438	146392	108060	-0.438004	-0.429907	0.5535	0.256882	0.999503	protein_coding	chr2	222860942-222944639	+	ENSG00000123983.15
XLOC_057346	XLOC_057346	ACSL4	-5.21985	-0.0521985	chrX:109641334-109734958	TKS4_WT	TKS4_WT_T	96468.2	91432.7	-0.0773427	96468.2	91432.7	-0.0773432	-0.0799229	0.92325	0.0346807	0.999503	protein_coding	chrX	109624244-109733403	-	ENSG00000068366.21
XLOC_005846	XLOC_005846	ACSL5	-23.1272	-0.231272	chr10:112374115-112855368	TKS4_WT	TKS4_WT_T	68629.2	52757.2	-0.379454	68629.2	52757.2	-0.379455	-0.161543	0.79005	0.102345	0.999503	protein_coding	chr10	112374116-112428379	+	ENSG00000197142.11
XLOC_042361	XLOC_042361	ACSL6	2.4436	0.024436	chr5:131949972-132012068	TKS4_WT	TKS4_WT_T	762.399	781.029	0.0348303	762.399	781.029	0.0348299	0.0230039	0.96645	0.0148206	0.999503	protein_coding	chr5	131949973-132012243	-	ENSG00000164398.15
XLOC_019653	XLOC_019653	ACSM1	82416.4	824.164	chr16:20623234-20697680	TKS4_WT	TKS4_WT_T	0	82.5164		0.1	82.5164	9.68854		5e-05	4.30103	0.0217956	protein_coding	chr16	20623235-20698890	-	ENSG00000166743.10
XLOC_018676	XLOC_018676	ACSM2A	-99.6799	-0.996799	chr16:20451503-20487669	TKS4_WT	TKS4_WT_T	31.2442	0		31.2442	0.1	-8.28744	0	1	0	1	protein_coding	chr16	20451461-20487669	+	ENSG00000183747.12
XLOC_018681	XLOC_018681	ACSM3	33.7106	0.337106	chr16:20742439-20849682	TKS4_WT	TKS4_WT_T	4999.67	6685.09	0.419113	4999.67	6685.09	0.419114	0.153977	0.73135	0.135875	0.999503	protein_coding	chr16	20610243-20797581	+	ENSG00000005187.12
XLOC_005699	XLOC_005699	ACSM6	55383.8	553.838	chr10:95142803-95228929	TKS4_WT	TKS4_WT_T	0	55.4838		0.1	55.4838	9.11592		0.2465	0.608183	0.999503	protein_coding	chr10	95194200-95228928	+	ENSG00000173124.14
XLOC_031646	XLOC_031646	ACSS2	-2.15006	-0.0215006	chr20:34874941-34927966	TKS4_WT	TKS4_WT_T	26520.2	25950	-0.0313539	26520.2	25950	-0.0313571	-0.0311558	0.9677	0.0142593	0.999503	protein_coding	chr20	34872146-34927962	+	ENSG00000131069.20
XLOC_004751	XLOC_004751	ACTA1	-58.9503	-0.589503	chr1:229431244-229434094	TKS4_WT	TKS4_WT_T	266.869	109.549	-1.28456	266.869	109.549	-1.28456	-0.568693	0.47865	0.319982	0.999503	protein_coding	chr1	229430365-229434104	-	ENSG00000143632.15
XLOC_006718	XLOC_006718	ACTA2	31.2846	0.312846	chr10:88932683-89017059	TKS4_WT	TKS4_WT_T	1310.07	1719.92	0.392699	1310.07	1719.92	0.392698	0.11472	0.85475	0.0681609	0.999503	protein_coding	chr10	88935074-88991339	-	ENSG00000107796.13
XLOC_049394	XLOC_049394	ACTB	12.7758	0.127758	chr7:5527147-5530601	TKS4_WT	TKS4_WT_T	2393660	2699470	0.173457	2393660	2699470	0.173458	0.0886434	0.9061	0.0428239	0.999503	protein_coding	chr7	5526409-5563902	-	ENSG00000075624.17
XLOC_041898	XLOC_041898	ACTBL2	54.5394	0.545394	chr5:57480017-57482811	TKS4_WT	TKS4_WT_T	105.872	163.614	0.627974	105.872	163.614	0.627975	0.416253	0.3926	0.40605	0.999503	protein_coding	chr5	57480018-57482811	-	ENSG00000169067.4
XLOC_022813	XLOC_022813	ACTG1	23.1742	0.231742	chr17:81509970-81512799	TKS4_WT	TKS4_WT_T	3059390	3768380	0.300702	3059390	3768380	0.3007	0.152002	0.85645	0.067298	0.999503	protein_coding	chr17	81509413-81523847	-	ENSG00000184009.13
XLOC_028141	XLOC_028141	ACTG2	26932.6	269.326	chr2:73893007-73919865	TKS4_WT	TKS4_WT_T	0	27.0326		0.1	27.0326	8.07856	0	1	0	1	protein_coding	chr2	73892314-73919865	+	ENSG00000163017.14
XLOC_031633	XLOC_031633	ACTL10	571.605	5.71605	chr20:33657086-33674428	TKS4_WT	TKS4_WT_T	62.4884	419.675	2.74761	62.4884	419.675	2.74761	0.589079	0.34785	0.458608	0.999503	protein_coding	chr20	33666943-33668525	+	ENSG00000288649.2
XLOC_035991	XLOC_035991	ACTL6A	17.1733	0.171733	chr3:179562925-179604646	TKS4_WT	TKS4_WT_T	49782.6	58331.9	0.228644	49782.6	58331.9	0.228643	0.136869	0.90155	0.0450102	0.999503	protein_coding	chr3	179562886-179588407	+	ENSG00000136518.17
XLOC_053955	XLOC_053955	ACTL7A	-99.6799	-0.996799	chr9:108862265-108863756	TKS4_WT	TKS4_WT_T	31.2442	0		31.2442	0.1	-8.28744	0	1	0	1	protein_coding	chr9	108862266-108863756	+	ENSG00000187003.7
XLOC_055064	XLOC_055064	ACTL7B	-81.7879	-0.817879	chr9:108854587-108855986	TKS4_WT	TKS4_WT_T	156.221	28.4512	-2.45703	156.221	28.4512	-2.45703	0	1	0	1	protein_coding	chr9	108854588-108855986	-	ENSG00000148156.8
XLOC_000270	XLOC_000270	ACTL8	155.721	1.55721	chr1:17755332-17827063	TKS4_WT	TKS4_WT_T	416.125	1064.12	1.35457	416.125	1064.12	1.35457	0.921552	0.17075	0.767639	0.999503	protein_coding	chr1	17755333-17827063	+	ENSG00000117148.8
XLOC_015493	XLOC_015493	ACTN1	-11.1523	-0.111523	chr14:68874122-68979302	TKS4_WT	TKS4_WT_T	114846	102038	-0.170593	114846	102038	-0.170594	-0.179532	0.79335	0.100535	0.999503	protein_coding	chr14	68874128-68979440	-	ENSG00000072110.16
XLOC_002351	XLOC_002351	ACTN2	1254.53	12.5453	chr1:236686498-236764631	TKS4_WT	TKS4_WT_T	26.468	358.517	3.75972	26.468	358.517	3.75972	3.14956	0.24455	0.611632	0.999503	protein_coding	chr1	236664141-236764631	+	ENSG00000077522.15
XLOC_024919	XLOC_024919	ACTN4	-29.8244	-0.298244	chr19:38647648-38744474	TKS4_WT	TKS4_WT_T	350659	246077	-0.510962	350659	246077	-0.510959	-0.462748	0.51395	0.289079	0.999503	protein_coding	chr19	38647649-38731589	+	ENSG00000130402.13
XLOC_014489	XLOC_014489	ACTR10	-27.912	-0.27912	chr14:58200148-58235636	TKS4_WT	TKS4_WT_T	31941.5	23026	-0.472169	31941.5	23026	-0.472168	-0.486669	0.5058	0.296021	0.999503	protein_coding	chr14	58200080-58235636	+	ENSG00000131966.14
XLOC_006859	XLOC_006859	ACTR1A	13.0772	0.130772	chr10:102460895-102502712	TKS4_WT	TKS4_WT_T	139380	157607	0.177312	139380	157607	0.177308	0.16091	0.8181	0.0871936	0.999503	protein_coding	chr10	102461881-102502712	-	ENSG00000138107.13
XLOC_030263	XLOC_030263	ACTR1B	19.1066	0.191066	chr2:97655938-97703066	TKS4_WT	TKS4_WT_T	14504.9	17276.3	0.25226	14504.9	17276.3	0.252254	0.240305	0.7329	0.134955	0.999503	protein_coding	chr2	97655939-97664044	-	ENSG00000115073.8
XLOC_028067	XLOC_028067	ACTR2	-7.88453	-0.0788453	chr2:65227830-65271253	TKS4_WT	TKS4_WT_T	227306	209384	-0.118487	227306	209384	-0.118485	-0.118545	0.86905	0.0609552	0.999503	protein_coding	chr2	65227788-65271253	+	ENSG00000138071.15
XLOC_028508	XLOC_028508	ACTR3	-5.23082	-0.0523082	chr2:113831182-113962596	TKS4_WT	TKS4_WT_T	170585	161662	-0.0775102	170585	161662	-0.0775102	-0.0809295	0.91315	0.0394579	0.999503	protein_coding	chr2	113890063-113962596	+	ENSG00000115091.12
XLOC_049291	XLOC_049291	ACTR3B	-22.0579	-0.220579	chr7:152759751-153070979	TKS4_WT	TKS4_WT_T	22712	17702.2	-0.359526	22712	17702.2	-0.359526	-0.344913	0.6642	0.177701	0.999503	protein_coding	chr7	152759749-152855378	+	ENSG00000133627.18
XLOC_050497	XLOC_050497	ACTR3C	-53.4801	-0.534801	chr7:149881358-150338156	TKS4_WT	TKS4_WT_T	5131.61	2387.22	-1.10408	5131.61	2387.22	-1.10408	-0.428483	0.07645	1.11662	0.999503	protein_coding	chr7	150243916-150323725	-	ENSG00000106526.11
XLOC_031697	XLOC_031697	ACTR5	-18.513	-0.18513	chr20:38748459-38772520	TKS4_WT	TKS4_WT_T	36429.6	29685.4	-0.295356	36429.6	29685.4	-0.295358	-0.302165	0.65425	0.184256	0.999503	protein_coding	chr20	38748460-38772520	+	ENSG00000101442.10
XLOC_011010	XLOC_011010	ACTR6	20.2745	0.202745	chr12:100200814-100341724	TKS4_WT	TKS4_WT_T	33676.3	40504	0.26633	33676.3	40504	0.266331	0.149021	0.8277	0.082127	0.999503	protein_coding	chr12	100199122-100241865	+	ENSG00000075089.10
XLOC_036631	XLOC_036631	ACTR8	8.16545	0.0816545	chr3:53846549-53882160	TKS4_WT	TKS4_WT_T	46187.3	49958.7	0.113239	46187.3	49958.7	0.11324	0.0979945	0.886	0.0525663	0.999503	protein_coding	chr3	53867066-53882152	-	ENSG00000113812.14
XLOC_037365	XLOC_037365	ACTRT3	20.5027	0.205027	chr3:169766920-169769561	TKS4_WT	TKS4_WT_T	2682.43	3232.4	0.269069	2682.43	3232.4	0.269065	0.192991	0.78585	0.10466	0.999503	protein_coding	chr3	169766921-169769561	-	ENSG00000184378.3
XLOC_030686	XLOC_030686	ACVR1	-26.1026	-0.261026	chr2:157736445-157876330	TKS4_WT	TKS4_WT_T	15368.6	11357	-0.436401	15368.6	11357	-0.436404	-0.442165	0.56875	0.245079	0.999503	protein_coding	chr2	157736251-157876330	-	ENSG00000115170.16
XLOC_010582	XLOC_010582	ACVR1B	22.6374	0.226374	chr12:51951695-51997079	TKS4_WT	TKS4_WT_T	20720.1	25410.6	0.294403	20720.1	25410.6	0.294399	0.269061	0.6895	0.161466	0.999503	protein_coding	chr12	51951699-51997078	+	ENSG00000135503.13
XLOC_030684	XLOC_030684	ACVR1C	-39.8245	-0.398245	chr2:157526766-157628864	TKS4_WT	TKS4_WT_T	2870.09	1727.09	-0.732751	2870.09	1727.09	-0.732753	-0.504728	0.48035	0.318442	0.999503	protein_coding	chr2	157526767-157628864	-	ENSG00000123612.16
XLOC_028729	XLOC_028729	ACVR2A	17.5301	0.175301	chr2:147844516-148516971	TKS4_WT	TKS4_WT_T	13864.7	16295.2	0.233035	13864.7	16295.2	0.233031	0.105467	0.80015	0.0968286	0.999503	protein_coding	chr2	147844517-147930826	+	ENSG00000121989.15
XLOC_034980	XLOC_034980	ACVR2B	-7.11484	-0.0711484	chr3:38346759-38493142	TKS4_WT	TKS4_WT_T	59964.8	55698.4	-0.10648	59964.8	55698.4	-0.10648	-0.0876111	0.9014	0.0450824	0.999503	protein_coding	chr3	38453890-38493142	+	ENSG00000114739.14
XLOC_010581	XLOC_010581	ACVRL1	46.0437	0.460437	chr12:51906912-51923361	TKS4_WT	TKS4_WT_T	1129.97	1650.25	0.546405	1129.97	1650.25	0.5464	0.38553	0.5429	0.26528	0.999503	protein_coding	chr12	51906908-51923361	+	ENSG00000139567.13
XLOC_009368	XLOC_009368	ACY3	-76.5797	-0.765797	chr11:67642550-67650829	TKS4_WT	TKS4_WT_T	115.424	27.0326	-2.09418	115.424	27.0326	-2.09417	-0.93617	0.2798	0.553152	0.999503	protein_coding	chr11	67642555-67650730	-	ENSG00000132744.8
XLOC_015562	XLOC_015562	ACYP1	-19.6422	-0.196422	chr14:75053242-75069490	TKS4_WT	TKS4_WT_T	4307.52	3461.43	-0.315489	4307.52	3461.43	-0.315489	-0.241086	0.76635	0.115573	0.999503	protein_coding	chr14	75053237-75069483	-	ENSG00000119640.9
XLOC_027981	XLOC_027981	ACYP2,HMGB1P31	-11.6779	-0.116779	chr2:53864068-54305300	TKS4_WT	TKS4_WT_T	7991.15	7057.95	-0.179155	7991.15	7057.95	-0.179154	-0.0388021	0.82485	0.083625	0.999503	protein_coding,processed_pseudogene
XLOC_032420	XLOC_032420	ADA	18.4121	0.184121	chr20:44619521-44651699	TKS4_WT	TKS4_WT_T	10757.6	12738.3	0.243826	10757.6	12738.3	0.243817	0.242116	0.73435	0.134097	0.999503	protein_coding	chr20	44584896-44652252	-	ENSG00000196839.14
XLOC_033967	XLOC_033967	ADA2	56802.4	568.024	chr22:17178789-17221854	TKS4_WT	TKS4_WT_T	0	56.9024		0.1	56.9024	9.15235	0	1	0	1	protein_coding	chr22	17178790-17258235	-	ENSG00000093072.19
XLOC_019266	XLOC_019266	ADAD2	135063	1350.63	chr16:84191156-84197166	TKS4_WT	TKS4_WT_T	0	135.163		0.1	135.163	10.4005	0	1	0	1	protein_coding	chr16	84191138-84197168	+	ENSG00000140955.11
XLOC_016572	XLOC_016572	ADAL	-15.381	-0.15381	chr15:43323648-43354569	TKS4_WT	TKS4_WT_T	4882.46	4131.49	-0.240943	4882.46	4131.49	-0.240946	-0.122774	0.8145	0.0891089	0.999503	protein_coding	chr15	43330672-43354569	+	ENSG00000168803.16
XLOC_017539	XLOC_017539	ADAM10	-24.8789	-0.248789	chr15:58588808-58749707	TKS4_WT	TKS4_WT_T	180663	135716	-0.412705	180663	135716	-0.41271	-0.431438	0.5653	0.247721	0.999503	protein_coding	chr15	58588809-58749791	-	ENSG00000137845.15
XLOC_021176	XLOC_021176	ADAM11	49.2198	0.492198	chr17:44758987-44781846	TKS4_WT	TKS4_WT_T	9645.1	14392.4	0.577443	9645.1	14392.4	0.577439	0.496951	0.47875	0.319891	0.999503	protein_coding	chr17	44758988-44781846	+	ENSG00000073670.14
XLOC_007022	XLOC_007022	ADAM12	-67.8873	-0.678873	chr10:126012390-126388477	TKS4_WT	TKS4_WT_T	84.1803	27.0326	-1.63878	84.1803	27.0326	-1.63878	0	1	0	1	protein_coding	chr10	126012381-126388477	-	ENSG00000148848.15
XLOC_001553	XLOC_001553	ADAM15	-16.2084	-0.162084	chr1:155033805-155069553	TKS4_WT	TKS4_WT_T	110412	92516	-0.255126	110412	92516	-0.255122	-0.252159	0.7165	0.144784	0.999503	protein_coding	chr1	155050566-155062775	+	ENSG00000143537.14
XLOC_029500	XLOC_029500	ADAM17	-9.98049	-0.0998049	chr2:9474531-9555830	TKS4_WT	TKS4_WT_T	58528.2	52686.8	-0.151689	58528.2	52686.8	-0.15169	-0.152255	0.82255	0.0848377	0.999503	protein_coding	chr2	9488486-9556732	-	ENSG00000151694.14
XLOC_042596	XLOC_042596	ADAM19	0.982625	0.00982625	chr5:157477303-157575775	TKS4_WT	TKS4_WT_T	50578.8	51075.8	0.0141077	50578.8	51075.8	0.0141071	0.0134084	0.98475	0.00667401	0.999503	protein_coding	chr5	157395534-157575775	-	ENSG00000135074.16
XLOC_015511	XLOC_015511	ADAM20	35.5834	0.355834	chr14:70520816-70564742	TKS4_WT	TKS4_WT_T	5906.35	8008.03	0.439181	5906.35	8008.03	0.439181	0.350889	0.62335	0.205268	0.999503	protein_coding	chr14	70522358-70535015	-	ENSG00000134007.5
XLOC_014595	XLOC_014595	ADAM21	81.4893	0.814893	chr14:70452173-70459905	TKS4_WT	TKS4_WT_T	2764.02	5016.4	0.859884	2764.02	5016.4	0.859884	0.694854	0.34355	0.46401	0.999503	protein_coding	chr14	70417107-70460427	+	ENSG00000139985.8
XLOC_048684	XLOC_048684	ADAM22	-10.8237	-0.108237	chr7:87934162-88202889	TKS4_WT	TKS4_WT_T	23126.1	20623	-0.165265	23126.1	20623	-0.165268	-0.1656	0.85855	0.0662344	0.999503	protein_coding	chr7	87934143-88202889	+	ENSG00000008277.15
XLOC_029112	XLOC_029112	ADAM23	-13.4796	-0.134796	chr2:206443531-206621127	TKS4_WT	TKS4_WT_T	31.2442	27.0326	-0.208887	31.2442	27.0326	-0.208888	0	1	0	1	protein_coding	chr2	206443532-206621127	+	ENSG00000114948.13
XLOC_050945	XLOC_050945	ADAM28	-78.3699	-0.783699	chr8:24294039-24548618	TKS4_WT	TKS4_WT_T	124.977	27.0326	-2.20889	124.977	27.0326	-2.20889	0	1	0	1	protein_coding	chr8	24294069-24359014	+	ENSG00000042980.13
XLOC_051064	XLOC_051064	ADAM32	33.1353	0.331353	chr8:39107528-39284917	TKS4_WT	TKS4_WT_T	2513.27	3346.05	0.412894	2513.27	3346.05	0.412893	0.341749	0.57565	0.239841	0.999503	protein_coding	chr8	39106990-39284917	+	ENSG00000197140.15
XLOC_032048	XLOC_032048	ADAM33	-99.6799	-0.996799	chr20:3667964-3682108	TKS4_WT	TKS4_WT_T	31.2442	0		31.2442	0.1	-8.28744	0	1	0	1	protein_coding	chr20	3667965-3682246	-	ENSG00000149451.19
XLOC_007064	XLOC_007064	ADAM8	-79.2496	-0.792496	chr10:133262421-133276891	TKS4_WT	TKS4_WT_T	1199.82	248.968	-2.26878	1199.82	248.968	-2.26879	-1.33185	0.02235	1.65072	0.999503	protein_coding	chr10	133262420-133276868	-	ENSG00000151651.16
XLOC_051063	XLOC_051063	ADAM9	-29.8066	-0.298066	chr8:38988807-39105261	TKS4_WT	TKS4_WT_T	219180	153850	-0.510589	219180	153850	-0.510592	-0.504726	0.47785	0.320708	0.999503	protein_coding	chr8	38996754-39105445	+	ENSG00000168615.13
XLOC_025649	XLOC_025649	ADAMTS10	-17.4036	-0.174036	chr19:8580239-8610715	TKS4_WT	TKS4_WT_T	1889.38	1560.56	-0.275848	1889.38	1560.56	-0.275849	-0.158928	0.77685	0.109663	0.999503	protein_coding	chr19	8580240-8610735	-	ENSG00000142303.14
XLOC_041747	XLOC_041747	ADAMTS12	28351.2	283.512	chr5:33523534-33892180	TKS4_WT	TKS4_WT_T	0	28.4512		0.1	28.4512	8.15235	0	1	0	1	protein_coding	chr5	33523535-33892019	-	ENSG00000151388.11
XLOC_054197	XLOC_054197	ADAMTS13	-21.6875	-0.216875	chr9:133361448-133459403	TKS4_WT	TKS4_WT_T	2966.41	2323.07	-0.352686	2966.41	2323.07	-0.352685	-0.0373536	0.84705	0.072091	0.999503	protein_coding	chr9	133414358-133459402	+	ENSG00000160323.19
XLOC_005481	XLOC_005481	ADAMTS14	-58.3234	-0.583234	chr10:70672505-70762441	TKS4_WT	TKS4_WT_T	15002	6252.33	-1.26269	15002	6252.33	-1.26269	-1.00949	0.1747	0.757707	0.999503	protein_coding	chr10	70672506-70762441	+	ENSG00000138316.11
XLOC_008518	XLOC_008518	ADAMTS15	9.64804	0.0964804	chr11:130448644-130478215	TKS4_WT	TKS4_WT_T	1550.47	1700.06	0.13288	1550.47	1700.06	0.13288	0.0933362	0.88535	0.052885	0.999503	protein_coding	chr11	130448645-130476645	+	ENSG00000166106.4
XLOC_040378	XLOC_040378	ADAMTS16	-18.0333	-0.180333	chr5:5140329-5422391	TKS4_WT	TKS4_WT_T	1147.28	940.387	-0.28689	1147.28	940.387	-0.286891	-0.168608	0.80275	0.0954197	0.999503	protein_coding	chr5	5140330-5320304	+	ENSG00000145536.15
XLOC_017973	XLOC_017973	ADAMTS17	33.069	0.33069	chr15:99971436-100342924	TKS4_WT	TKS4_WT_T	8626.58	11479.3	0.412175	8626.58	11479.3	0.412174	0.393567	0.57395	0.241126	0.999503	protein_coding	chr15	99971437-100342005	-	ENSG00000140470.15
XLOC_042758	XLOC_042758	ADAMTS2	-39.3012	-0.393012	chr5:179110852-179345461	TKS4_WT	TKS4_WT_T	3384.32	2054.24	-0.720263	3384.32	2054.24	-0.720261	-0.480281	0.534	0.272459	0.999503	protein_coding	chr5	179110853-179345461	-	ENSG00000087116.16
XLOC_011736	XLOC_011736	ADAMTS20	53965.2	539.652	chr12:43352842-43552203	TKS4_WT	TKS4_WT_T	0	54.0652		0.1	54.0652	9.07856	0	1	0	1	protein_coding	chr12	43353866-43552203	-	ENSG00000173157.18
XLOC_004115	XLOC_004115	ADAMTS4,B4GALT3	27.168	0.27168	chr1:161165823-161214395	TKS4_WT	TKS4_WT_T	37737.8	47990.4	0.346734	37737.8	47990.4	0.346736	0.235145	0.7207	0.142245	0.999503	protein_coding,protein_coding
XLOC_041940	XLOC_041940	ADAMTS6	-17.5361	-0.175361	chr5:65148735-65482663	TKS4_WT	TKS4_WT_T	1281.81	1057.03	-0.278166	1281.81	1057.03	-0.278166	-0.200111	0.64195	0.192499	0.999503	protein_coding	chr5	65148738-65481920	-	ENSG00000049192.15
XLOC_017785	XLOC_017785	ADAMTS7	-54.0858	-0.540858	chr15:78759202-78811476	TKS4_WT	TKS4_WT_T	11460.8	5262.13	-1.12299	11460.8	5262.13	-1.12299	-0.833559	0.23505	0.62884	0.999503	protein_coding	chr15	78759206-78811464	-	ENSG00000136378.15
XLOC_016951	XLOC_016951	ADAMTSL3	56802.4	568.024	chr15:83654094-84039842	TKS4_WT	TKS4_WT_T	0	56.9024		0.1	56.9024	9.15235	0	1	0	1	protein_coding	chr15	83654088-84039842	+	ENSG00000156218.13
XLOC_001444	XLOC_001444	ADAMTSL4	27.8599	0.278599	chr1:150548563-150579738	TKS4_WT	TKS4_WT_T	1365.19	1745.53	0.354563	1365.19	1745.53	0.354563	0.029887	0.823	0.0846002	0.999503	protein_coding	chr1	150549369-150560937	+	ENSG00000143382.16
XLOC_003861	XLOC_003861	ADAMTSL4-AS1,MCL1	14.4438	0.144438	chr1:150548563-150579738	TKS4_WT	TKS4_WT_T	247027	282707	0.194639	247027	282707	0.194639	0.205082	0.77375	0.111399	0.999503	lncRNA,protein_coding
XLOC_025504	XLOC_025504	ADAMTSL5	-30.3595	-0.303595	chr19:1505017-1513038	TKS4_WT	TKS4_WT_T	7660.6	5334.88	-0.522003	7660.6	5334.88	-0.522002	-0.448454	0.5544	0.256177	0.999503	protein_coding	chr19	1505022-1513604	-	ENSG00000185761.11
XLOC_049350	XLOC_049350	ADAP1	-8.53308	-0.0853308	chr7:897899-955407	TKS4_WT	TKS4_WT_T	17455.6	15966.1	-0.128676	17455.6	15966.1	-0.128678	-0.120362	0.86175	0.0646187	0.999503	protein_coding	chr7	897900-955407	-	ENSG00000105963.15
XLOC_020925	XLOC_020925	ADAP2	-27.2653	-0.272653	chr17:30921903-30959398	TKS4_WT	TKS4_WT_T	16236.4	11809.5	-0.459283	16236.4	11809.5	-0.459284	-0.421306	0.55665	0.254418	0.999503	protein_coding	chr17	30906344-30959322	+	ENSG00000184060.11
XLOC_003969	XLOC_003969	ADAR	8.56178	0.0856178	chr1:154567777-154627997	TKS4_WT	TKS4_WT_T	325493	353361	0.118519	325493	353361	0.118516	0.116767	0.8836	0.0537443	0.999503	protein_coding	chr1	154581695-154628013	-	ENSG00000160710.18
XLOC_033002	XLOC_033002	ADARB1	-22.848	-0.22848	chr21:45074577-45226563	TKS4_WT	TKS4_WT_T	19984.7	15418.6	-0.374229	19984.7	15418.6	-0.374224	-0.353504	0.63775	0.19535	0.999503	protein_coding	chr21	45073853-45226560	+	ENSG00000197381.17
XLOC_020155	XLOC_020155	ADAT1	-3.87244	-0.0387244	chr16:75596867-75623281	TKS4_WT	TKS4_WT_T	28764.8	27650.9	-0.0569784	28764.8	27650.9	-0.056978	-0.0549449	0.9435	0.0252581	0.999503	protein_coding	chr16	75596868-75623300	-	ENSG00000065457.11
XLOC_045704	XLOC_045704	ADAT2	18.3549	0.183549	chr6:143422831-143450750	TKS4_WT	TKS4_WT_T	34117.3	40379.5	0.243121	34117.3	40379.5	0.24312	0.274061	0.69665	0.156985	0.999503	protein_coding	chr6	143422832-143450695	-	ENSG00000189007.16
XLOC_024291	XLOC_024291	ADAT3,SCAMP4	-40.5897	-0.405897	chr19:1905398-1926013	TKS4_WT	TKS4_WT_T	37443.7	22245.4	-0.751212	37443.7	22245.4	-0.751216	-0.690855	0.37165	0.429866	0.999503	protein_coding,protein_coding
XLOC_014681	XLOC_014681	ADCK1	81.2476	0.812476	chr14:77800063-77935014	TKS4_WT	TKS4_WT_T	4422.15	8015.04	0.857962	4422.15	8015.04	0.857962	0.763026	0.23985	0.62006	0.999503	protein_coding	chr14	77800109-77935014	+	ENSG00000063761.16
XLOC_049125	XLOC_049125	ADCK2	2.84032	0.0284032	chr7:140672894-140695114	TKS4_WT	TKS4_WT_T	14857.5	15279.5	0.0404023	14857.5	15279.5	0.040406	0.0412217	0.95275	0.021021	0.999503	protein_coding	chr7	140672945-140696261	+	ENSG00000133597.11
XLOC_051728	XLOC_051728	ADCK5	-21.7684	-0.217684	chr8:144373761-144409400	TKS4_WT	TKS4_WT_T	10723.7	8389.32	-0.35418	10723.7	8389.32	-0.354177	-0.109159	0.76415	0.116821	0.999503	protein_coding	chr8	144373101-144393242	+	ENSG00000173137.12
XLOC_048355	XLOC_048355	ADCY1	28351.2	283.512	chr7:45574139-45723116	TKS4_WT	TKS4_WT_T	0	28.4512		0.1	28.4512	8.15235	0	1	0	1	protein_coding	chr7	45574140-45723116	+	ENSG00000164742.16
XLOC_004188	XLOC_004188	ADCY10	-15.0136	-0.150136	chr1:167809079-167916389	TKS4_WT	TKS4_WT_T	682.994	580.452	-0.234697	682.994	580.452	-0.234696	-0.132582	0.7594	0.119529	0.999503	protein_coding	chr1	167809386-167914215	-	ENSG00000143199.18
XLOC_029602	XLOC_029602	ADCY3	-29.0516	-0.290516	chr2:24789727-24920237	TKS4_WT	TKS4_WT_T	55594.6	39443.5	-0.495156	55594.6	39443.5	-0.495157	-0.322127	0.6812	0.166725	0.999503	protein_coding	chr2	24819169-24920237	-	ENSG00000138031.15
XLOC_015173	XLOC_015173	ADCY4	-99.8267	-0.998267	chr14:24318358-24335071	TKS4_WT	TKS4_WT_T	57.7122	0		57.7122	0.1	-9.17273		0.0159	1.7986	0.999503	protein_coding	chr14	24318349-24335093	-	ENSG00000129467.14
XLOC_036988	XLOC_036988	ADCY5	125.257	1.25257	chr3:123282295-123449090	TKS4_WT	TKS4_WT_T	262.093	590.382	1.17157	262.093	590.382	1.17157	0.526635	0.0526	1.27901	0.999503	protein_coding	chr3	123282296-123449090	-	ENSG00000173175.15
XLOC_011790	XLOC_011790	ADCY6	4.50007	0.0450007	chr12:48727406-48789089	TKS4_WT	TKS4_WT_T	22884.1	23913.9	0.0635049	22884.1	23913.9	0.0635039	0.0564278	0.9341	0.0296066	0.999503	protein_coding	chr12	48766194-48789089	-	ENSG00000174233.12
XLOC_018964	XLOC_018964	ADCY7	25.0954	0.250954	chr16:50246137-50368988	TKS4_WT	TKS4_WT_T	27807.5	34785.9	0.323026	27807.5	34785.9	0.323029	0.2069	0.79945	0.0972087	0.999503	protein_coding	chr16	50246137-50318135	+	ENSG00000121281.13
XLOC_019489	XLOC_019489	ADCY9	-42.9456	-0.429456	chr16:3953386-4116442	TKS4_WT	TKS4_WT_T	23924.7	13650.1	-0.809588	23924.7	13650.1	-0.809589	-0.72165	0.3284	0.483597	0.999503	protein_coding	chr16	3953387-4116442	-	ENSG00000162104.10
XLOC_048248	XLOC_048248	ADCYAP1R1	-23.3744	-0.233744	chr7:31052307-31124016	TKS4_WT	TKS4_WT_T	146.669	112.386	-0.384096	146.669	112.386	-0.384102	-0.101038	0.5617	0.250496	0.999503	protein_coding	chr7	31052308-31111479	+	ENSG00000078549.15
XLOC_037843	XLOC_037843	ADD1	-7.86784	-0.0786784	chr4:2843843-2930075	TKS4_WT	TKS4_WT_T	104143	95949.2	-0.118216	104143	95949.2	-0.118223	-0.131753	0.8382	0.0766523	0.999503	protein_coding	chr4	2843844-2930076	+	ENSG00000087274.19
XLOC_029986	XLOC_029986	ADD2	-81.7879	-0.817879	chr2:70656783-70768200	TKS4_WT	TKS4_WT_T	156.221	28.4512	-2.45703	156.221	28.4512	-2.45703	0	1	0	1	protein_coding	chr2	70607618-70768225	-	ENSG00000075340.23
XLOC_005828	XLOC_005828	ADD3	-11.8717	-0.118717	chr10:109945558-110135565	TKS4_WT	TKS4_WT_T	65986.6	58152.9	-0.182323	65986.6	58152.9	-0.182322	-0.199523	0.76885	0.114158	0.999503	protein_coding	chr10	109996368-110135565	+	ENSG00000148700.15
XLOC_051050	XLOC_051050	ADGRA2	-22.614	-0.22614	chr8:37796882-37849861	TKS4_WT	TKS4_WT_T	11908.6	9215.59	-0.369858	11908.6	9215.59	-0.369855	-0.21555	0.85045	0.0703512	0.999503	protein_coding	chr8	37784191-37844896	+	ENSG00000020181.18
XLOC_039208	XLOC_039208	ADGRA3	-20.0358	-0.200358	chr4:22387375-22516066	TKS4_WT	TKS4_WT_T	99082	79230.1	-0.322574	99082	79230.1	-0.322574	-0.336393	0.63995	0.193854	0.999503	protein_coding	chr4	22345071-22516066	-	ENSG00000152990.14
XLOC_051682	XLOC_051682	ADGRB1	-51.9168	-0.519168	chr8:142449648-142545009	TKS4_WT	TKS4_WT_T	2127.19	1022.82	-1.05639	2127.19	1022.82	-1.0564	-0.527011	0.33965	0.468968	0.999503	protein_coding	chr8	142449430-142545009	+	ENSG00000181790.12
XLOC_002910	XLOC_002910	ADGRB2	36.1489	0.361489	chr1:31727104-31764340	TKS4_WT	TKS4_WT_T	13269	18065.6	0.445179	13269	18065.6	0.445186	0.358812	0.6078	0.216239	0.999503	protein_coding	chr1	31727117-31764893	-	ENSG00000121753.13
XLOC_011305	XLOC_011305	ADGRD1	433.781	4.33781	chr12:130953906-131141469	TKS4_WT	TKS4_WT_T	120.201	641.61	2.41625	120.201	641.61	2.41625	1.30002	0.1422	0.8471	0.999503	protein_coding	chr12	130953907-131141469	+	ENSG00000111452.13
XLOC_054058	XLOC_054058	ADGRD2	35.4561	0.354561	chr9:124447030-124477795	TKS4_WT	TKS4_WT_T	124.977	169.289	0.437825	124.977	169.289	0.437826	0.177386	0.8228	0.0847057	0.999503	protein_coding	chr9	124450451-124478589	+	ENSG00000180264.12
XLOC_024377	XLOC_024377	ADGRE1	-66.2021	-0.662021	chr19:6887548-6940450	TKS4_WT	TKS4_WT_T	84.1803	28.4512	-1.56499	84.1803	28.4512	-1.56499	0	1	0	1	protein_coding	chr19	6887566-6940459	+	ENSG00000174837.15
XLOC_025793	XLOC_025793	ADGRE2	-32.6233	-0.326233	chr19:14689786-14778560	TKS4_WT	TKS4_WT_T	12521.2	8436.37	-0.569674	12521.2	8436.37	-0.569679	-0.387616	0.6488	0.187889	0.999503	protein_coding	chr19	14732392-14778560	-	ENSG00000127507.18
XLOC_024551	XLOC_024551	ADGRE5	-16.1676	-0.161676	chr19:14381143-14408725	TKS4_WT	TKS4_WT_T	55989	46936.9	-0.254421	55989	46936.9	-0.254421	-0.265057	0.7155	0.14539	0.999503	protein_coding	chr19	14380501-14408725	+	ENSG00000123146.20
XLOC_045114	XLOC_045114	ADGRF1	-13.9205	-0.139205	chr6:46997707-47042350	TKS4_WT	TKS4_WT_T	56252.1	48421.5	-0.216259	56252.1	48421.5	-0.216259	-0.230041	0.7436	0.128661	0.999503	protein_coding	chr6	46997708-47042350	-	ENSG00000153292.16
XLOC_029620	XLOC_029620	ADGRF3	245.683	2.45683	chr2:26299048-26395885	TKS4_WT	TKS4_WT_T	199.605	690.001	1.78945	199.605	690.001	1.78945	0.0822719	0.20605	0.686027	0.999503	protein_coding	chr2	26308173-26346817	-	ENSG00000173567.16
XLOC_043695	XLOC_043695	ADGRF4	53965.2	539.652	chr6:47698579-47722014	TKS4_WT	TKS4_WT_T	0	54.0652		0.1	54.0652	9.07856	0	1	0	1	protein_coding	chr6	47685864-47722021	+	ENSG00000153294.12
XLOC_045113	XLOC_045113	ADGRF5	135063	1350.63	chr6:46852521-46954954	TKS4_WT	TKS4_WT_T	0	135.163		0.1	135.163	10.4005	0	1	0	1	protein_coding	chr6	46852522-46954943	-	ENSG00000069122.19
XLOC_019056	XLOC_019056	ADGRG1,ADGRG3	13.5023	0.135023	chr16:57619534-57689378	TKS4_WT	TKS4_WT_T	14741.9	16732.4	0.182721	14741.9	16732.4	0.182722	0.141481	0.8143	0.0892156	0.999503	protein_coding,protein_coding
XLOC_056483	XLOC_056483	ADGRG4	-99.6222	-0.996222	chrX:136300962-136416890	TKS4_WT	TKS4_WT_T	26.468	0		26.468	0.1	-8.04811	0	1	0	1	protein_coding	chrX	136300963-136416890	+	ENSG00000156920.11
XLOC_019053	XLOC_019053	ADGRG5	-56.0108	-0.560108	chr16:57512177-57607366	TKS4_WT	TKS4_WT_T	4236.47	1863.59	-1.18478	4236.47	1863.59	-1.18478	-0.574938	0.44355	0.353057	0.999503	protein_coding	chr16	57542643-57591681	+	ENSG00000159618.16
XLOC_044226	XLOC_044226	ADGRG6	-12.0253	-0.120253	chr6:142302006-142446266	TKS4_WT	TKS4_WT_T	192660	169492	-0.184842	192660	169492	-0.18484	-0.187471	0.7957	0.0992506	0.999503	protein_coding	chr6	142301854-142446266	+	ENSG00000112414.15
XLOC_035440	XLOC_035440	ADGRG7	141.576	1.41576	chr3:100609600-100696174	TKS4_WT	TKS4_WT_T	57.7122	139.419	1.27248	57.7122	139.419	1.27248	0.313178	0.28945	0.538426	0.999503	protein_coding	chr3	100609601-100695479	+	ENSG00000144820.8
XLOC_025783	XLOC_025783	ADGRL1	-9.06895	-0.0906895	chr19:14137151-14206245	TKS4_WT	TKS4_WT_T	110101	100116	-0.137161	110101	100116	-0.137155	-0.119943	0.86935	0.0608053	0.999503	protein_coding	chr19	14147743-14206187	-	ENSG00000072071.17
XLOC_000942	XLOC_000942	ADGRL2	164.101	1.64101	chr1:81306103-81993932	TKS4_WT	TKS4_WT_T	31.2442	82.5164	1.40109	31.2442	82.5164	1.40109	0.25277	0.2247	0.648397	0.999503	protein_coding	chr1	81306147-81993932	+	ENSG00000117114.21
XLOC_003348	XLOC_003348	ADGRL4	-54.4696	-0.544696	chr1:78889763-79006730	TKS4_WT	TKS4_WT_T	62.4884	28.4512	-1.1351	62.4884	28.4512	-1.1351	0	1	0	1	protein_coding	chr1	78889764-79282124	-	ENSG00000162618.15
XLOC_040880	XLOC_040880	ADGRV1	-35.3686	-0.353686	chr5:90558795-91207669	TKS4_WT	TKS4_WT_T	18100.5	11698.6	-0.629691	18100.5	11698.6	-0.629694	-0.580651	0.4401	0.356449	0.999503	protein_coding	chr5	90529344-91164437	+	ENSG00000164199.18
XLOC_039651	XLOC_039651	ADH1C	56802.4	568.024	chr4:99336496-99352746	TKS4_WT	TKS4_WT_T	0	56.9024		0.1	56.9024	9.15235	0	1	0	1	protein_coding	chr4	99336497-99352746	-	ENSG00000248144.6
XLOC_039644	XLOC_039644	ADH5	17.7286	0.177286	chr4:99070977-99088788	TKS4_WT	TKS4_WT_T	220142	259170	0.235466	220142	259170	0.235464	0.214196	0.7569	0.120961	0.999503	protein_coding	chr4	99070978-99088801	-	ENSG00000197894.12
XLOC_051246	XLOC_051246	ADHFE1	135.615	1.35615	chr8:66432503-66468907	TKS4_WT	TKS4_WT_T	141.893	334.321	1.23644	141.893	334.321	1.23643	0.611448	0.38915	0.409883	0.999503	protein_coding	chr8	66432492-66468907	+	ENSG00000147576.17
XLOC_029454	XLOC_029454	ADI1	22.098	0.22098	chr2:3497365-3519531	TKS4_WT	TKS4_WT_T	64106.8	78273.1	0.288039	64106.8	78273.1	0.288039	0.297623	0.6678	0.175354	0.999503	protein_coding	chr2	3497366-3519531	-	ENSG00000182551.14
XLOC_031694	XLOC_031694	ADIG	-99.6799	-0.996799	chr20:38581196-38588463	TKS4_WT	TKS4_WT_T	31.2442	0		31.2442	0.1	-8.28744	0	1	0	1	protein_coding	chr20	38581195-38588463	+	ENSG00000182035.13
XLOC_004450	XLOC_004450	ADIPOR1	-2.50641	-0.0250641	chr1:202940824-202958572	TKS4_WT	TKS4_WT_T	122406	119338	-0.0366123	122406	119338	-0.0366208	-0.037602	0.958	0.0186345	0.999503	protein_coding	chr1	202940826-202958572	-	ENSG00000159346.13
XLOC_010132	XLOC_010132	ADIPOR2	-15.3667	-0.153667	chr12:1691058-1788674	TKS4_WT	TKS4_WT_T	122089	103328	-0.240698	122089	103328	-0.240702	-0.267279	0.6932	0.159141	0.999503	protein_coding	chr12	1688574-1788674	+	ENSG00000006831.10
XLOC_005517	XLOC_005517	ADK,MRPL35P3	31.5606	0.315606	chr10:74151184-74709303	TKS4_WT	TKS4_WT_T	78569.9	103367	0.395731	78569.9	103367	0.395727	0.447827	0.5222	0.282163	0.999503	protein_coding,processed_pseudogene
XLOC_007320	XLOC_007320	ADM	20.2263	0.202263	chr11:10305072-10307397	TKS4_WT	TKS4_WT_T	42452.1	51038.6	0.265753	42452.1	51038.6	0.265753	0.279267	0.6761	0.169989	0.999503	protein_coding	chr11	10305073-10307397	+	ENSG00000148926.10
XLOC_033917	XLOC_033917	ADM2,MIOX	47.1006	0.471006	chr22:50481542-50490648	TKS4_WT	TKS4_WT_T	4585.93	6745.93	0.556803	4585.93	6745.93	0.556803	0.39989	0.5553	0.255472	0.999503	protein_coding,protein_coding
XLOC_025174	XLOC_025174	ADM5,CPT1C	-11.9236	-0.119236	chr19:49688684-49713731	TKS4_WT	TKS4_WT_T	7131.24	6280.94	-0.183173	7131.24	6280.94	-0.183172	-0.15511	0.79015	0.10229	0.999503	protein_coding,protein_coding
XLOC_032510	XLOC_032510	ADNP	19.3292	0.193292	chr20:50888917-50958564	TKS4_WT	TKS4_WT_T	195688	233513	0.254953	195688	233513	0.254948	0.197198	0.7819	0.106849	0.999503	protein_coding	chr20	50888916-50931437	-	ENSG00000101126.18
XLOC_023705	XLOC_023705	ADNP2	-5.19743	-0.0519743	chr18:80109250-80140346	TKS4_WT	TKS4_WT_T	128833	122137	-0.0769969	128833	122137	-0.0770019	-0.0847784	0.90905	0.0414122	0.999503	protein_coding	chr18	80109262-80147523	+	ENSG00000101544.9
XLOC_005420	XLOC_005420	ADO	22.1287	0.221287	chr10:62804719-62808479	TKS4_WT	TKS4_WT_T	55807.1	68156.5	0.288401	55807.1	68156.5	0.288403	0.303852	0.65245	0.185453	0.999503	protein_coding	chr10	62804720-62808479	+	ENSG00000181915.5
XLOC_002035	XLOC_002035	ADORA1	11.4794	0.114794	chr1:203127704-203167405	TKS4_WT	TKS4_WT_T	3296.16	3674.54	0.156775	3296.16	3674.54	0.156777	0.120796	0.8742	0.0583892	0.999503	protein_coding	chr1	203090654-203167405	+	ENSG00000163485.17
XLOC_033606	XLOC_033606	ADORA2A,SPECC1L,SPECC1L-ADORA2A	-43.4937	-0.434937	chr22:24270816-24528681	TKS4_WT	TKS4_WT_T	81691.3	46160.7	-0.823517	81691.3	46160.7	-0.823517	-0.842792	0.2606	0.584026	0.999503	protein_coding,protein_coding,protein_coding
XLOC_020715	XLOC_020715	ADORA2B	-41.5468	-0.415468	chr17:15927781-15975746	TKS4_WT	TKS4_WT_T	62887.4	36759.7	-0.774648	62887.4	36759.7	-0.774646	-0.816883	0.24665	0.607919	0.999503	protein_coding	chr17	15945130-15975746	+	ENSG00000170425.4
XLOC_017705	XLOC_017705	ADPGK	4.9981	0.049981	chr15:72751293-72798199	TKS4_WT	TKS4_WT_T	75640.7	79421.3	0.0703635	75640.7	79421.3	0.0703633	0.0770308	0.9152	0.038484	0.999503	protein_coding	chr15	72751294-72785846	-	ENSG00000159322.18
XLOC_035562	XLOC_035562	ADPRH	92.6263	0.926263	chr3:119579491-119589945	TKS4_WT	TKS4_WT_T	1606.39	3094.33	0.945802	1606.39	3094.33	0.945805	0.838001	0.2516	0.599289	0.999503	protein_coding	chr3	119579268-119589945	+	ENSG00000144843.12
XLOC_014056	XLOC_014056	ADPRHL1	-57.1848	-0.571848	chr13:113421944-113453488	TKS4_WT	TKS4_WT_T	6094.01	2609.16	-1.22381	6094.01	2609.16	-1.22381	-1.0303	0.1472	0.832092	0.999503	protein_coding	chr13	113399611-113453488	-	ENSG00000153531.15
XLOC_020683	XLOC_020683	ADPRM	-1.07018	-0.0107018	chr17:10697593-10815164	TKS4_WT	TKS4_WT_T	2991.09	2959.08	-0.015519	2991.09	2959.08	-0.0155226	-0.0123629	0.9852	0.0064756	0.999503	protein_coding	chr17	10697594-10711558	+	ENSG00000170222.12
XLOC_000513	XLOC_000513	ADPRS	52.0606	0.520606	chr1:36088884-36093932	TKS4_WT	TKS4_WT_T	26615.7	40472	0.604645	26615.7	40472	0.604647	0.641799	0.34615	0.460736	0.999503	protein_coding	chr1	36088892-36093932	+	ENSG00000116863.11
XLOC_052005	XLOC_052005	ADRA1A	36.5911	0.365911	chr8:26738112-26870994	TKS4_WT	TKS4_WT_T	62.4884	85.3536	0.449864	62.4884	85.3536	0.449864	0	1	0	1	protein_coding	chr8	26748150-26867278	-	ENSG00000120907.18
XLOC_041348	XLOC_041348	ADRA1B	-65.9403	-0.659403	chr5:159916481-159989205	TKS4_WT	TKS4_WT_T	334.134	113.805	-1.55386	334.134	113.805	-1.55386	-0.915094	0.3923	0.406382	0.999503	protein_coding	chr5	159865080-159973012	+	ENSG00000170214.5
XLOC_032057	XLOC_032057	ADRA1D	-8.93926	-0.0893926	chr20:4220629-4249287	TKS4_WT	TKS4_WT_T	62.4884	56.9024	-0.135099	62.4884	56.9024	-0.135099	0	1	0	1	protein_coding	chr20	4220630-4249287	-	ENSG00000171873.8
XLOC_005838	XLOC_005838	ADRA2A	-64.3343	-0.643343	chr10:111077028-111080907	TKS4_WT	TKS4_WT_T	538.515	192.065	-1.48739	538.515	192.065	-1.48739	-0.778839	0.27575	0.559484	0.999503	protein_coding	chr10	111077029-111080907	+	ENSG00000150594.7
XLOC_030236	XLOC_030236	ADRA2B	-41.8436	-0.418436	chr2:96112875-96116571	TKS4_WT	TKS4_WT_T	1105.69	643.029	-0.781987	1105.69	643.029	-0.781991	-0.442902	0.53005	0.275683	0.999503	protein_coding	chr2	96112876-96116571	-	ENSG00000274286.2
XLOC_037855	XLOC_037855	ADRA2C	16.7318	0.167318	chr4:3766384-3768526	TKS4_WT	TKS4_WT_T	21491.4	25087.3	0.223198	21491.4	25087.3	0.223198	0.226823	0.75255	0.123465	0.999503	protein_coding	chr4	3766348-3768526	+	ENSG00000184160.8
XLOC_005865	XLOC_005865	ADRB1	-44.2162	-0.442162	chr10:114043865-114046904	TKS4_WT	TKS4_WT_T	1718.83	958.829	-0.84208	1718.83	958.829	-0.842081	-0.579246	0.3812	0.418847	0.999503	protein_coding	chr10	114043866-114046904	+	ENSG00000043591.6
XLOC_041257	XLOC_041257	ADRB2	-9.49301	-0.0949301	chr5:148826610-148828623	TKS4_WT	TKS4_WT_T	853.544	772.517	-0.143898	853.544	772.517	-0.143899	-0.102222	0.89315	0.0490756	0.999503	protein_coding	chr5	148826611-148828623	+	ENSG00000169252.6
XLOC_031935	XLOC_031935	ADRM1	-12.0863	-0.120863	chr20:62302060-62308862	TKS4_WT	TKS4_WT_T	159652	140356	-0.185835	159652	140356	-0.18584	-0.190234	0.7998	0.0970186	0.999503	protein_coding	chr20	62302093-62308862	+	ENSG00000130706.13
XLOC_033795	XLOC_033795	ADSL	-8.80085	-0.0880085	chr22:40346499-40636719	TKS4_WT	TKS4_WT_T	88024.5	80277.6	-0.132909	88024.5	80277.6	-0.132908	-0.116565	0.8797	0.0556654	0.999503	protein_coding	chr22	40346461-40390463	+	ENSG00000239900.14
XLOC_014993	XLOC_014993	ADSS1	-60.0982	-0.600982	chr14:104724200-104747325	TKS4_WT	TKS4_WT_T	1764.8	704.187	-1.32547	1764.8	704.187	-1.32547	-0.903432	0.16435	0.78423	0.999503	protein_coding	chr14	104724229-104747325	+	ENSG00000185100.11
XLOC_004887	XLOC_004887	ADSS2	-11.1533	-0.111533	chr1:244408491-244640504	TKS4_WT	TKS4_WT_T	51376.6	45646.4	-0.170612	51376.6	45646.4	-0.17061	-0.183183	0.7928	0.100836	0.999503	protein_coding	chr1	244408494-244451909	-	ENSG00000035687.10
XLOC_044553	XLOC_044553	ADTRP	1156.69	11.5669	chr6:11713522-11779628	TKS4_WT	TKS4_WT_T	31.2442	392.642	3.65156	31.2442	392.642	3.65155	2.80989	0.205	0.688246	0.999503	protein_coding	chr6	11712054-11807046	-	ENSG00000111863.13
XLOC_048338	XLOC_048338	AEBP1	168.642	1.68642	chr7:44104319-44114564	TKS4_WT	TKS4_WT_T	31.2442	83.935	1.42568	31.2442	83.935	1.42568	0.663468	0.4665	0.331148	0.999503	protein_coding	chr7	44104345-44114562	+	ENSG00000106624.11
XLOC_010353	XLOC_010353	AEBP2	-51.0931	-0.510931	chr12:19404100-19522227	TKS4_WT	TKS4_WT_T	53092.1	25965.7	-1.03189	53092.1	25965.7	-1.03189	-1.15227	0.1234	0.908685	0.999503	protein_coding	chr12	19404045-19720801	+	ENSG00000139154.16
XLOC_016994	XLOC_016994	AEN,MIR1179	57.1017	0.571017	chr15:88585570-88632281	TKS4_WT	TKS4_WT_T	100771	158313	0.651698	100771	158313	0.651699	0.660034	0.3388	0.470057	0.999503	protein_coding,miRNA
XLOC_039120	XLOC_039120	AFAP1	-48.7352	-0.487352	chr4:7754089-7940296	TKS4_WT	TKS4_WT_T	43931.5	22521.4	-0.963957	43931.5	22521.4	-0.963959	-0.946544	0.17665	0.752886	0.999503	protein_coding	chr4	7758714-7939926	-	ENSG00000196526.11
XLOC_041260	XLOC_041260	AFAP1L1	-1.24142	-0.0124142	chr5:149271858-149343637	TKS4_WT	TKS4_WT_T	7695.23	7599.7	-0.0180215	7695.23	7599.7	-0.018022	-0.0157918	0.9826	0.00762324	0.999503	protein_coding	chr5	149271859-149343637	+	ENSG00000157510.14
XLOC_006932	XLOC_006932	AFAP1L2	113.274	1.13274	chr10:114239253-114404672	TKS4_WT	TKS4_WT_T	564.983	1204.96	1.09271	564.983	1204.96	1.09271	0.569215	0.03765	1.42424	0.999503	protein_coding	chr10	114294824-114404756	-	ENSG00000169129.16
XLOC_044415	XLOC_044415	AFDN	-36.1549	-0.361549	chr6:167823889-167972023	TKS4_WT	TKS4_WT_T	93684.1	59812.7	-0.647352	93684.1	59812.7	-0.647352	-0.692253	0.436	0.360514	0.999503	protein_coding	chr6	167826911-167972023	+	ENSG00000130396.21
XLOC_038419	XLOC_038419	AFF1	-28.7089	-0.287089	chr4:86924893-87141054	TKS4_WT	TKS4_WT_T	79854	56928.8	-0.488206	79854	56928.8	-0.488206	-0.525024	0.44635	0.350324	0.999503	protein_coding	chr4	86935002-87141039	+	ENSG00000172493.23
XLOC_056554	XLOC_056554	AFF2	53965.2	539.652	chrX:148500616-149000663	TKS4_WT	TKS4_WT_T	0	54.0652		0.1	54.0652	9.07856	0	1	0	1	protein_coding	chrX	148500617-149000663	+	ENSG00000155966.14
XLOC_030279	XLOC_030279	AFF3	222.478	2.22478	chr2:99545418-100142590	TKS4_WT	TKS4_WT_T	26.468	85.3536	1.6892	26.468	85.3536	1.6892	0	1	0	1	protein_coding	chr2	99545419-100192428	-	ENSG00000144218.21
XLOC_042377	XLOC_042377	AFF4	-9.48144	-0.0948144	chr5:132875380-132963655	TKS4_WT	TKS4_WT_T	122608	110983	-0.143721	122608	110983	-0.143714	-0.148986	0.826	0.08302	0.999503	protein_coding	chr5	132875395-132963634	-	ENSG00000072364.13
XLOC_043994	XLOC_043994	AFG1L,RPL36AP24	-44.5994	-0.445994	chr6:108294880-108526001	TKS4_WT	TKS4_WT_T	4732.8	2622	-0.852025	4732.8	2622	-0.852026	-0.65772	0.3803	0.419874	0.999503	protein_coding,-
XLOC_023807	XLOC_023807	AFG3L2	-18.415	-0.18415	chr18:12307668-12377309	TKS4_WT	TKS4_WT_T	123546	100795	-0.293626	123546	100795	-0.293624	-0.183257	0.7838	0.105795	0.999503	protein_coding	chr18	12328944-12377227	-	ENSG00000141385.12
XLOC_021571	XLOC_021571	AFMID	119.125	1.19125	chr17:78174078-78207702	TKS4_WT	TKS4_WT_T	13528.3	29643.9	1.13175	13528.3	29643.9	1.13175	0.327903	0.3205	0.494172	0.999503	protein_coding	chr17	78187358-78207702	+	ENSG00000183077.16
XLOC_028054	XLOC_028054	AFTPH	-18.879	-0.18879	chr2:64518208-64607248	TKS4_WT	TKS4_WT_T	45691.4	37065.3	-0.301853	45691.4	37065.3	-0.301853	-0.306984	0.66985	0.174022	0.999503	protein_coding	chr2	64524299-64593005	+	ENSG00000119844.17
XLOC_040107	XLOC_040107	AGA	-9.24384	-0.0924384	chr4:177430773-177442469	TKS4_WT	TKS4_WT_T	5253.01	4767.43	-0.139932	5253.01	4767.43	-0.139933	-0.121977	0.85325	0.0689237	0.999503	protein_coding	chr4	177430774-177442437	-	ENSG00000038002.9
XLOC_029355	XLOC_029355	AGAP1	-29.0275	-0.290275	chr2:235494042-236131795	TKS4_WT	TKS4_WT_T	93364.2	66262.9	-0.494668	93364.2	66262.9	-0.494668	-0.451666	0.52885	0.276667	0.999503	protein_coding	chr2	235494043-236131800	+	ENSG00000157985.19
XLOC_011986	XLOC_011986	AGAP2	-3.68776	-0.0368776	chr12:57723760-57742201	TKS4_WT	TKS4_WT_T	16172.4	15576	-0.0542008	16172.4	15576	-0.054209	-0.0338944	0.97135	0.0126243	0.999503	protein_coding	chr12	57723761-57742157	-	ENSG00000135439.12
XLOC_049272	XLOC_049272	AGAP3	-32.0459	-0.320459	chr7:151085866-151144435	TKS4_WT	TKS4_WT_T	45543.7	30948.8	-0.557366	45543.7	30948.8	-0.557368	-0.461418	0.5325	0.27368	0.999503	protein_coding	chr7	151085831-151144436	+	ENSG00000133612.19
XLOC_005367	XLOC_005367	AGAP6,TIMM23B,TIMM23B-AGAP6	-12.0497	-0.120497	chr10:49942052-50010516	TKS4_WT	TKS4_WT_T	28996.6	25502.6	-0.18524	28996.6	25502.6	-0.185239	-0.20645	0.7897	0.102538	0.999503	protein_coding,protein_coding,protein_coding
XLOC_009024	XLOC_009024	AGBL2	-79.2503	-0.792503	chr11:47659167-47715382	TKS4_WT	TKS4_WT_T	137.116	28.4512	-2.26884	137.116	28.4512	-2.26884	0	1	0	1	protein_coding	chr11	47659591-47715389	-	ENSG00000165923.17
XLOC_049071	XLOC_049071	AGBL3	2.95457	0.0295457	chr7:134986138-135170826	TKS4_WT	TKS4_WT_T	2821.73	2905.1	0.0420055	2821.73	2905.1	0.0420079	0.0098908	0.96735	0.0144164	0.999503	protein_coding	chr7	134986508-135147963	+	ENSG00000146856.14
XLOC_027790	XLOC_027790	AGBL5	11.2639	0.112639	chr2:27051422-27071654	TKS4_WT	TKS4_WT_T	25169.9	28005	0.153984	25169.9	28005	0.153985	0.0549185	0.94215	0.0258799	0.999503	protein_coding	chr2	27042364-27070622	+	ENSG00000084693.16
XLOC_044923	XLOC_044923	AGER	46.2585	0.462585	chr6:32180967-32184380	TKS4_WT	TKS4_WT_T	1635.05	2391.4	0.548522	1635.05	2391.4	0.548521	0.42006	0.4584	0.338755	0.999503	protein_coding	chr6	32180968-32184322	-	ENSG00000204305.16
XLOC_029275	XLOC_029275	AGFG1,MIR5703	-22.8184	-0.228184	chr2:227472131-227561217	TKS4_WT	TKS4_WT_T	129663	100076	-0.373666	129663	100076	-0.373671	-0.353184	0.62975	0.200832	0.999503	protein_coding,miRNA
XLOC_048803	XLOC_048803	AGFG2	-29.3749	-0.293749	chr7:100539202-100568220	TKS4_WT	TKS4_WT_T	18358.9	12966	-0.50174	18358.9	12966	-0.501746	-0.478367	0.52665	0.278478	0.999503	protein_coding	chr7	100539203-100568220	+	ENSG00000106351.13
XLOC_040798	XLOC_040798	AGGF1	19.6742	0.196742	chr5:77030403-77065234	TKS4_WT	TKS4_WT_T	45619.1	54594.3	0.259112	45619.1	54594.3	0.259112	0.262777	0.71905	0.143241	0.999503	protein_coding	chr5	77029251-77065234	+	ENSG00000164252.13
XLOC_049134	XLOC_049134	AGK	8.0859	0.080859	chr7:141551409-141702188	TKS4_WT	TKS4_WT_T	54107.8	58482.9	0.112178	54107.8	58482.9	0.112178	0.0769404	0.9294	0.0317973	0.999503	protein_coding	chr7	141551278-141655244	+	ENSG00000006530.18
XLOC_001084	XLOC_001084	AGL	-7.62506	-0.0762506	chr1:99850076-99924023	TKS4_WT	TKS4_WT_T	95392	88118.3	-0.114426	95392	88118.3	-0.114427	-0.124486	0.85495	0.0680593	0.999503	protein_coding	chr1	99850361-99924023	+	ENSG00000162688.17
XLOC_002694	XLOC_002694	AGMAT	-99.8111	-0.998111	chr1:15526693-15585051	TKS4_WT	TKS4_WT_T	52.9361	0		52.9361	0.1	-9.04811	0	1	0	1	protein_coding	chr1	15571699-15585051	-	ENSG00000116771.6
XLOC_049454	XLOC_049454	AGMO	85253.6	852.536	chr7:15117222-15562015	TKS4_WT	TKS4_WT_T	0	85.3536		0.1	85.3536	9.73731	0	1	0	1	protein_coding	chr7	15200317-15562015	-	ENSG00000187546.14
XLOC_000511	XLOC_000511	AGO1,AGO3	-27.6567	-0.276567	chr1:35869760-36072500	TKS4_WT	TKS4_WT_T	237288	171662	-0.467064	237288	171662	-0.467068	-0.460061	0.54335	0.26492	0.999503	protein_coding,protein_coding
XLOC_052758	XLOC_052758	AGO2	-31.4769	-0.314769	chr8:140520155-140642406	TKS4_WT	TKS4_WT_T	371241	254386	-0.545338	371241	254386	-0.545337	-0.482649	0.49665	0.30395	0.999503	protein_coding	chr8	140520156-140635633	-	ENSG00000123908.12
XLOC_000510	XLOC_000510	AGO4	-26.4691	-0.264691	chr1:35807629-35857890	TKS4_WT	TKS4_WT_T	14924.6	10974.2	-0.443574	14924.6	10974.2	-0.443576	-0.406754	0.6122	0.213107	0.999503	protein_coding	chr1	35808016-35857890	+	ENSG00000134698.11
XLOC_044922	XLOC_044922	AGPAT1,MIR6721	22.0428	0.220428	chr6:32148327-32178108	TKS4_WT	TKS4_WT_T	32506.3	39671.6	0.287387	32506.3	39671.6	0.287387	0.230942	0.7406	0.130416	0.999503	protein_coding,miRNA
XLOC_055369	XLOC_055369	AGPAT2	1.13487	0.0113487	chr9:136673142-136687457	TKS4_WT	TKS4_WT_T	45071.3	45582.8	0.0162805	45071.3	45582.8	0.0162805	0.0171093	0.9816	0.00806545	0.999503	protein_coding	chr9	136673143-136687457	-	ENSG00000169692.13
XLOC_032972	XLOC_032972	AGPAT3	-38.5126	-0.385126	chr21:43865159-43987592	TKS4_WT	TKS4_WT_T	51622.8	31741.5	-0.70164	51622.8	31741.5	-0.701638	-0.706743	0.3187	0.496618	0.999503	protein_coding	chr21	43865223-43987592	+	ENSG00000160216.21
XLOC_045818	XLOC_045818	AGPAT4	-28.8263	-0.288263	chr6:161129966-161274108	TKS4_WT	TKS4_WT_T	15868.5	11294.2	-0.490584	15868.5	11294.2	-0.490584	-0.435164	0.53695	0.270066	0.999503	protein_coding	chr6	161129967-161274061	-	ENSG00000026652.15
XLOC_050748	XLOC_050748	AGPAT5	-3.91291	-0.0391291	chr8:6708586-6761503	TKS4_WT	TKS4_WT_T	151524	145595	-0.0575815	151524	145595	-0.0575855	-0.0565781	0.935	0.0291884	0.999503	protein_coding	chr8	6708642-6761503	+	ENSG00000155189.12
XLOC_028913	XLOC_028913	AGPS	20.7249	0.207249	chr2:177392772-177543834	TKS4_WT	TKS4_WT_T	105226	127034	0.271735	105226	127034	0.271723	0.28511	0.68375	0.165103	0.999503	protein_coding	chr2	177392746-177567024	+	ENSG00000018510.18
XLOC_049462	XLOC_049462	AGR2	53965.2	539.652	chr7:16791810-16804999	TKS4_WT	TKS4_WT_T	0	54.0652		0.1	54.0652	9.07856	0	1	0	1	protein_coding	chr7	16791811-16833433	-	ENSG00000106541.12
XLOC_000030	XLOC_000030	AGRN	-25.9232	-0.259232	chr1:1020101-1056119	TKS4_WT	TKS4_WT_T	80790.7	59847.2	-0.432906	80790.7	59847.2	-0.432905	-0.385364	0.58125	0.235637	0.999503	protein_coding	chr1	1020120-1056118	+	ENSG00000188157.15
XLOC_004769	XLOC_004769	AGT	85253.6	852.536	chr1:230702522-230745583	TKS4_WT	TKS4_WT_T	0	85.3536		0.1	85.3536	9.73731	0	1	0	1	protein_coding	chr1	230690776-230745576	-	ENSG00000135744.9
XLOC_054843	XLOC_054843	AGTPBP1	-16.1501	-0.161501	chr9:85546538-85742029	TKS4_WT	TKS4_WT_T	39013.9	32713.1	-0.254121	39013.9	32713.1	-0.25412	-0.266397	0.71685	0.144572	0.999503	protein_coding	chr9	85546539-85742029	-	ENSG00000135049.16
XLOC_000172	XLOC_000172	AGTRAP	4.25344	0.0425344	chr1:11736120-11750771	TKS4_WT	TKS4_WT_T	19835.7	20679.4	0.0600937	19835.7	20679.4	0.060095	0.0588556	0.9344	0.0294672	0.999503	protein_coding	chr1	11736084-11754802	+	ENSG00000177674.16
XLOC_004910	XLOC_004910	AHCTF1	-4.42528	-0.0442528	chr1:246839097-246931948	TKS4_WT	TKS4_WT_T	246041	235153	-0.0652976	246041	235153	-0.065299	-0.0631494	0.92675	0.0330374	0.999503	protein_coding	chr1	246839098-246931948	-	ENSG00000153207.16
XLOC_032314	XLOC_032314	AHCY	-14.3282	-0.143282	chr20:34186492-34311976	TKS4_WT	TKS4_WT_T	257863	220916	-0.223109	257863	220916	-0.223107	-0.226836	0.74195	0.129625	0.999503	protein_coding	chr20	34280268-34311802	-	ENSG00000101444.13
XLOC_001168	XLOC_001168	AHCYL1	0.97424	0.0097424	chr1:109984764-110023742	TKS4_WT	TKS4_WT_T	113935	115045	0.0139858	113935	115045	0.0139873	0.0148399	0.98345	0.00724772	0.999503	protein_coding	chr1	109984765-110023742	+	ENSG00000168710.18
XLOC_049025	XLOC_049025	AHCYL2	1.24128	0.0124128	chr7:129225029-129430211	TKS4_WT	TKS4_WT_T	28937.9	29297.1	0.0177971	28937.9	29297.1	0.0177976	0.0181261	0.9783	0.00952795	0.999503	protein_coding	chr7	129225030-129430211	+	ENSG00000158467.17
XLOC_002860	XLOC_002860	AHDC1	-46.3363	-0.463363	chr1:27534244-27604178	TKS4_WT	TKS4_WT_T	43390.4	23284.9	-0.897982	43390.4	23284.9	-0.897981	-0.72487	0.40555	0.391956	0.999503	protein_coding	chr1	27534035-27604431	-	ENSG00000126705.15
XLOC_045641	XLOC_045641	AHI1	-7.84236	-0.0784236	chr6:135283531-135497771	TKS4_WT	TKS4_WT_T	48202.3	44422.1	-0.117823	48202.3	44422.1	-0.117824	-0.128496	0.8855	0.0528114	0.999503	protein_coding	chr6	135283407-135498434	-	ENSG00000135541.22
XLOC_009224	XLOC_009224	AHNAK	-38.8821	-0.388821	chr11:62433543-62546806	TKS4_WT	TKS4_WT_T	1142100	698028	-0.710333	1142100	698028	-0.710332	-0.523933	0.467	0.330683	0.999503	protein_coding	chr11	62433542-62556235	-	ENSG00000124942.14
XLOC_015799	XLOC_015799	AHNAK2	-34.1905	-0.341905	chr14:104924300-104978374	TKS4_WT	TKS4_WT_T	120542	79328.1	-0.603633	120542	79328.1	-0.603632	-0.527473	0.45085	0.345968	0.999503	protein_coding	chr14	104937244-104978374	-	ENSG00000185567.7
XLOC_048135	XLOC_048135	AHR	-19.3822	-0.193822	chr7:17298651-17346147	TKS4_WT	TKS4_WT_T	76484	61659.7	-0.310831	76484	61659.7	-0.31083	-0.316015	0.6642	0.177701	0.999503	protein_coding	chr7	16916359-17346152	+	ENSG00000106546.14
XLOC_040337	XLOC_040337	AHRR,PDCD6,PDCD6-AHRR	12.7569	0.127569	chr5:271645-438285	TKS4_WT	TKS4_WT_T	93010.7	104876	0.17322	93010.7	104876	0.173216	0.174827	0.8068	0.0932341	0.999503	protein_coding,protein_coding,protein_coding
XLOC_014677	XLOC_014677	AHSA1	8.7457	0.087457	chr14:77457866-77469472	TKS4_WT	TKS4_WT_T	151423	164666	0.120963	151423	164666	0.120958	0.110351	0.8674	0.0617806	0.999503	protein_coding	chr14	77457870-77469472	+	ENSG00000100591.8
XLOC_036065	XLOC_036065	AHSG	55383.8	553.838	chr3:186613059-186621318	TKS4_WT	TKS4_WT_T	0	55.4838		0.1	55.4838	9.11592		0.0069	2.16115	0.73962	protein_coding	chr3	186613060-186621318	+	ENSG00000145192.13
XLOC_004646	XLOC_004646	AIDA	-19.6748	-0.196748	chr1:222668012-222735196	TKS4_WT	TKS4_WT_T	52670.4	42307.6	-0.316076	52670.4	42307.6	-0.316076	-0.205419	0.75485	0.122139	0.999503	protein_coding	chr1	222668013-222713210	-	ENSG00000186063.13
XLOC_043451	XLOC_043451	AIF1	53965.2	539.652	chr6:31615211-31617015	TKS4_WT	TKS4_WT_T	0	54.0652		0.1	54.0652	9.07856	0	1	0	1	protein_coding	chr6	31615217-31617021	+	ENSG00000204472.13
XLOC_054160	XLOC_054160	AIF1L	-10.0401	-0.100401	chr9:131096530-131123144	TKS4_WT	TKS4_WT_T	62942.4	56622.9	-0.152645	62942.4	56622.9	-0.152647	-0.163675	0.81635	0.0881236	0.999503	protein_coding	chr9	131096476-131123152	+	ENSG00000126878.13
XLOC_057473	XLOC_057473	AIFM1	-12.9996	-0.129996	chrX:130063954-130184873	TKS4_WT	TKS4_WT_T	31104.9	27061.4	-0.200904	31104.9	27061.4	-0.200905	-0.151339	0.83105	0.0803728	0.999503	protein_coding	chrX	130124666-130165879	-	ENSG00000156709.15
XLOC_006553	XLOC_006553	AIFM2	1.6411	0.016411	chr10:70052845-70132825	TKS4_WT	TKS4_WT_T	29388.9	29871.2	0.0234878	29388.9	29871.2	0.0234838	0.0171313	0.9794	0.0090399	0.999503	protein_coding	chr10	70098223-70132934	-	ENSG00000042286.15
XLOC_033555	XLOC_033555	AIFM3	-8.65841	-0.0865841	chr22:20965171-20981358	TKS4_WT	TKS4_WT_T	742.896	678.573	-0.130656	742.896	678.573	-0.130656	-0.0744916	0.892	0.0496351	0.999503	protein_coding	chr22	20965108-20981360	+	ENSG00000183773.16
XLOC_044228	XLOC_044228	AIG1,LOC100131471	11.9564	0.119564	chr6:143059212-143343883	TKS4_WT	TKS4_WT_T	43240.6	48410.6	0.162935	43240.6	48410.6	0.162936	0.1764	0.7937	0.100344	0.999503	protein_coding,-
XLOC_038517	XLOC_038517	AIMP1	39.1912	0.391912	chr4:106041598-106349456	TKS4_WT	TKS4_WT_T	47134.6	65607.2	0.477069	47134.6	65607.2	0.477068	0.41168	0.5806	0.236123	0.999503	protein_coding	chr4	106315544-106349456	+	ENSG00000164022.18
XLOC_048061	XLOC_048061	AIMP2	64.5907	0.645907	chr7:6009271-6059175	TKS4_WT	TKS4_WT_T	53581.7	88190.5	0.718884	53581.7	88190.5	0.718883	0.446468	0.5698	0.244278	0.999503	protein_coding	chr7	6009255-6023834	+	ENSG00000106305.10
XLOC_007925	XLOC_007925	AIP	45.8387	0.458387	chr11:67451300-67491108	TKS4_WT	TKS4_WT_T	24511.4	35747.1	0.544374	24511.4	35747.1	0.544373	0.527411	0.4373	0.359221	0.999503	protein_coding	chr11	67468174-67491154	+	ENSG00000110711.11
XLOC_000101	XLOC_000101	AJAP1	-99.6222	-0.996222	chr1:4654608-4792534	TKS4_WT	TKS4_WT_T	26.468	0		26.468	0.1	-8.04811	0	1	0	1	protein_coding	chr1	4654609-4792534	+	ENSG00000196581.11
XLOC_054250	XLOC_054250	AJM1	-13.5308	-0.135308	chr9:136842477-136847345	TKS4_WT	TKS4_WT_T	2064.7	1785.33	-0.209742	2064.7	1785.33	-0.209741	-0.104897	0.8868	0.0521743	0.999503	protein_coding	chr9	136842478-136848801	+	ENSG00000232434.3
XLOC_015132	XLOC_015132	AJUBA	98.0643	0.980643	chr14:22971176-22982551	TKS4_WT	TKS4_WT_T	40745.2	80701.7	0.985968	40745.2	80701.7	0.985969	0.958257	0.1809	0.742561	0.999503	protein_coding	chr14	22971177-22982551	-	ENSG00000129474.16
XLOC_055247	XLOC_055247	AK1,ST6GALNAC6	12.0172	0.120172	chr9:127866479-127906764	TKS4_WT	TKS4_WT_T	53953.4	60437.1	0.16372	53953.4	60437.1	0.163721	0.189761	0.786	0.104577	0.999503	protein_coding,protein_coding
XLOC_002931	XLOC_002931	AK2	55.5924	0.555924	chr1:33007939-33036883	TKS4_WT	TKS4_WT_T	214853	334295	0.637773	214853	334295	0.637772	0.62653	0.36025	0.443396	0.999503	protein_coding	chr1	33007986-33080996	-	ENSG00000004455.18
XLOC_054325	XLOC_054325	AK3	-6.67659	-0.0667659	chr9:4709555-4742043	TKS4_WT	TKS4_WT_T	51381	47950.5	-0.0996883	51381	47950.5	-0.0996891	-0.107717	0.88025	0.055394	0.999503	protein_coding	chr9	4709556-4742043	-	ENSG00000147853.17
XLOC_000839	XLOC_000839	AK4	21.1448	0.211448	chr1:65147341-65232145	TKS4_WT	TKS4_WT_T	81828.8	99131.3	0.276731	81828.8	99131.3	0.276732	0.274044	0.6936	0.158891	0.999503	protein_coding	chr1	65147549-65232145	+	ENSG00000162433.15
XLOC_011682	XLOC_011682	AK4P3	79.623	0.79623	chr12:31382222-31616583	TKS4_WT	TKS4_WT_T	589.262	1058.45	0.844969	589.262	1058.45	0.844972	0.101045	0.669	0.174574	0.999503	protein_coding	chr12	31615023-31652095	-	ENSG00000233381.4
XLOC_000916	XLOC_000916	AK5	137.616	1.37616	chr1:77281907-77559966	TKS4_WT	TKS4_WT_T	137.116	325.81	1.24863	137.116	325.81	1.24863	0.459855	0.1392	0.856361	0.999503	protein_coding	chr1	77282019-77559966	+	ENSG00000154027.19
XLOC_041970	XLOC_041970	AK6,TAF9	12.8028	0.128028	chr5:69350983-69414801	TKS4_WT	TKS4_WT_T	128292	144717	0.173801	128292	144717	0.173803	0.134926	0.85875	0.0661332	0.999503	protein_coding,protein_coding
XLOC_014799	XLOC_014799	AK7	-65.5699	-0.655699	chr14:96392110-96489427	TKS4_WT	TKS4_WT_T	1218.92	419.675	-1.53826	1218.92	419.675	-1.53826	-0.947184	0.0721	1.14206	0.999503	protein_coding	chr14	96392128-96489427	+	ENSG00000140057.9
XLOC_055303	XLOC_055303	AK8	27.1783	0.271783	chr9:132725573-132890314	TKS4_WT	TKS4_WT_T	803.195	1021.49	0.346846	803.195	1021.49	0.346853	0.147866	0.68855	0.162065	0.999503	protein_coding	chr9	132725578-132878777	-	ENSG00000165695.10
XLOC_045464	XLOC_045464	AK9	-59.4612	-0.594612	chr6:109444061-109691202	TKS4_WT	TKS4_WT_T	2323.22	941.806	-1.30262	2323.22	941.806	-1.30262	-0.215518	0.08555	1.06778	0.999503	protein_coding	chr6	109492855-109691217	-	ENSG00000155085.16
XLOC_021317	XLOC_021317	AKAP1	-11.6984	-0.116984	chr17:57085245-57121344	TKS4_WT	TKS4_WT_T	74400	65696.4	-0.17949	74400	65696.4	-0.179488	-0.185862	0.7859	0.104633	0.999503	protein_coding	chr17	57085092-57121346	+	ENSG00000121057.13
XLOC_021952	XLOC_021952	AKAP10	28.1993	0.281993	chr17:19904301-19977828	TKS4_WT	TKS4_WT_T	35746.6	45826.9	0.358391	35746.6	45826.9	0.358389	0.397967	0.5822	0.234928	0.999503	protein_coding	chr17	19904302-19978343	-	ENSG00000108599.15
XLOC_012938	XLOC_012938	AKAP11	-10.4466	-0.104466	chr13:42271469-42323266	TKS4_WT	TKS4_WT_T	116181	104044	-0.159178	116181	104044	-0.15918	-0.178799	0.8158	0.0884163	0.999503	protein_coding	chr13	42272152-42323261	+	ENSG00000023516.9
XLOC_044293	XLOC_044293	AKAP12	-50.7989	-0.507989	chr6:151239814-151358559	TKS4_WT	TKS4_WT_T	2181780	1073460	-1.02323	2181780	1073460	-1.02324	-0.79587	0.4331	0.363412	0.999503	protein_coding	chr6	151239967-151358559	+	ENSG00000131016.17
XLOC_016979	XLOC_016979	AKAP13,MIR7706	-29.9893	-0.299893	chr15:85380595-85749358	TKS4_WT	TKS4_WT_T	91989.7	64402.6	-0.514352	91989.7	64402.6	-0.514353	-0.505605	0.5013	0.299902	0.999503	protein_coding,miRNA
XLOC_056378	XLOC_056378	AKAP14	-99.937	-0.99937	chrX:119895892-119943751	TKS4_WT	TKS4_WT_T	158.808	0		158.808	0.1	-10.6331	0	1	0	1	protein_coding	chrX	119895837-119920716	+	ENSG00000186471.13
XLOC_055581	XLOC_055581	AKAP17A,ASMT	4.09109	0.0409109	chrX:1591603-1643081	TKS4_WT	TKS4_WT_T	12167.9	12665.7	0.0578404	12167.9	12665.7	0.0578466	0.0531937	0.94415	0.024959	0.999503	protein_coding,protein_coding
XLOC_011395	XLOC_011395	AKAP3	30.543	0.30543	chr12:4615507-4649051	TKS4_WT	TKS4_WT_T	2495.56	3257.78	0.384528	2495.56	3257.78	0.384526	0.269709	0.7286	0.137511	0.999503	protein_coding	chr12	4615508-4649051	-	ENSG00000111254.8
XLOC_014544	XLOC_014544	AKAP5	-61.5368	-0.615368	chr14:64388352-64543237	TKS4_WT	TKS4_WT_T	2075.05	798.131	-1.37845	2075.05	798.131	-1.37845	-0.10234	0.4382	0.358328	0.999503	protein_coding	chr14	64465499-64474503	+	ENSG00000179841.8
XLOC_014309	XLOC_014309	AKAP6	41.2192	0.412192	chr14:32203609-32837684	TKS4_WT	TKS4_WT_T	5249.62	7413.47	0.497935	5249.62	7413.47	0.497936	0.453639	0.5469	0.262092	0.999503	protein_coding	chr14	32329298-32837684	+	ENSG00000151320.11
XLOC_044152	XLOC_044152	AKAP7	-33.4547	-0.334547	chr6:131084991-131283534	TKS4_WT	TKS4_WT_T	4160.46	2768.59	-0.587588	4160.46	2768.59	-0.587592	-0.508974	0.2787	0.554863	0.999503	protein_coding	chr6	131135467-131283535	+	ENSG00000118507.18
XLOC_025809	XLOC_025809	AKAP8	-4.68504	-0.0468504	chr19:15353384-15379787	TKS4_WT	TKS4_WT_T	42757.4	40754.2	-0.0692259	42757.4	40754.2	-0.0692254	-0.072327	0.91015	0.040887	0.999503	protein_coding	chr19	15353385-15379815	-	ENSG00000105127.10
XLOC_025810	XLOC_025810	AKAP8L	-21.8391	-0.218391	chr19:15380049-15418988	TKS4_WT	TKS4_WT_T	32507.7	25408.3	-0.355479	32507.7	25408.3	-0.355482	-0.367034	0.58565	0.232362	0.999503	protein_coding	chr19	15380050-15419141	-	ENSG00000011243.19
XLOC_048706	XLOC_048706	AKAP9	-16.8234	-0.168234	chr7:91940861-92180725	TKS4_WT	TKS4_WT_T	89321	74294.2	-0.26575	89321	74294.2	-0.26575	-0.152757	0.8164	0.088097	0.999503	protein_coding	chr7	91940840-92110673	+	ENSG00000127914.19
XLOC_007304	XLOC_007304	AKIP1	24.1687	0.241687	chr11:8911116-8932947	TKS4_WT	TKS4_WT_T	12645.7	15702	0.312295	12645.7	15702	0.312301	0.297764	0.66825	0.175061	0.999503	protein_coding	chr11	8911139-8920084	+	ENSG00000166452.12
XLOC_000548	XLOC_000548	AKIRIN1	-7.36447	-0.0736447	chr1:38991275-39006059	TKS4_WT	TKS4_WT_T	102541	94989.4	-0.110364	102541	94989.4	-0.110362	-0.116398	0.8599	0.0655521	0.999503	protein_coding	chr1	38991276-39006059	+	ENSG00000174574.16
XLOC_045354	XLOC_045354	AKIRIN2	33.7929	0.337929	chr6:87590127-87702233	TKS4_WT	TKS4_WT_T	24580	32886.3	0.419999	24580	32886.3	0.420002	0.257838	0.7045	0.152119	0.999503	protein_coding	chr6	87674860-87702233	-	ENSG00000135334.9
XLOC_055130	XLOC_055130	AKNA	12.5935	0.125935	chr9:114334148-114398498	TKS4_WT	TKS4_WT_T	15300.7	17227.6	0.171127	15300.7	17227.6	0.171124	0.139511	0.84195	0.0747137	0.999503	protein_coding	chr9	114334156-114394405	-	ENSG00000106948.17
XLOC_003548	XLOC_003548	AKNAD1	-90.4562	-0.904562	chr1:108813576-108858524	TKS4_WT	TKS4_WT_T	298.113	28.4512	-3.3893	298.113	28.4512	-3.3893	-2.13566	0.24045	0.618975	0.999503	protein_coding	chr1	108815898-108963484	-	ENSG00000162641.20
XLOC_000656	XLOC_000656	AKR1A1	84.191	0.84191	chr1:45550778-45570051	TKS4_WT	TKS4_WT_T	44739.7	82406.5	0.881202	44739.7	82406.5	0.881203	0.871962	0.2271	0.643783	0.999503	protein_coding	chr1	45550543-45570049	+	ENSG00000117448.14
XLOC_050363	XLOC_050363	AKR1B1	74.9114	0.749114	chr7:134442349-134459239	TKS4_WT	TKS4_WT_T	37276.3	65200.5	0.806622	37276.3	65200.5	0.806624	0.85591	0.22305	0.651598	0.999503	protein_coding	chr7	134442356-134459284	-	ENSG00000085662.14
XLOC_049066	XLOC_049066	AKR1B10	123.729	1.23729	chr7:134527566-134541412	TKS4_WT	TKS4_WT_T	543.689	1216.39	1.16175	543.689	1216.39	1.16175	0.632581	0.31355	0.503693	0.999503	protein_coding	chr7	134527567-134541412	+	ENSG00000198074.10
XLOC_004997	XLOC_004997	AKR1C1	-26.0509	-0.260509	chr10:4963414-4983283	TKS4_WT	TKS4_WT_T	1290.96	954.653	-0.435399	1290.96	954.653	-0.435396	-0.289144	0.6765	0.169732	0.999503	protein_coding	chr10	4963253-4983283	+	ENSG00000187134.14
XLOC_006079	XLOC_006079	AKR1C2	53965.2	539.652	chr10:4987774-5018000	TKS4_WT	TKS4_WT_T	0	54.0652		0.1	54.0652	9.07856	0	1	0	1	protein_coding	chr10	4987775-5018031	-	ENSG00000151632.18
XLOC_005000	XLOC_005000	AKR1C3	131.341	1.31341	chr10:5033066-5107686	TKS4_WT	TKS4_WT_T	449.558	1040.01	1.21001	449.558	1040.01	1.21002	0.687406	0.4413	0.355266	0.999503	protein_coding	chr10	5035354-5107686	+	ENSG00000196139.14
XLOC_004996	XLOC_004996	AKR1E2	66.1593	0.661593	chr10:4824553-4916273	TKS4_WT	TKS4_WT_T	2236.45	3716.07	0.73257	2236.45	3716.07	0.732567	0.617257	0.1974	0.704653	0.999503	protein_coding	chr10	4786629-4848062	+	ENSG00000165568.18
XLOC_002747	XLOC_002747	AKR7A2	8.3353	0.083353	chr1:19302707-19312146	TKS4_WT	TKS4_WT_T	59447.2	64402.3	0.115504	59447.2	64402.3	0.115503	0.125595	0.86365	0.0636622	0.999503	protein_coding	chr1	19303965-19312144	-	ENSG00000053371.13
XLOC_002745	XLOC_002745	AKR7A3	-47.0751	-0.470751	chr1:19274228-19289362	TKS4_WT	TKS4_WT_T	1255.34	664.387	-0.917983	1255.34	664.387	-0.917982	-0.661305	0.4657	0.331894	0.999503	protein_coding	chr1	19282573-19288770	-	ENSG00000162482.5
XLOC_015796	XLOC_015796	AKT1	-44.561	-0.44561	chr14:104747774-104795748	TKS4_WT	TKS4_WT_T	123109	68250.4	-0.851021	123109	68250.4	-0.851027	-0.593911	0.4386	0.357931	0.999503	protein_coding	chr14	104769349-104795751	-	ENSG00000142208.18
XLOC_026364	XLOC_026364	AKT1S1	-27.3829	-0.273829	chr19:49869032-49888750	TKS4_WT	TKS4_WT_T	32918	23904.1	-0.461619	32918	23904.1	-0.461619	-0.336989	0.63115	0.199867	0.999503	protein_coding	chr19	49869033-49878459	-	ENSG00000204673.11
XLOC_026128	XLOC_026128	AKT2,MIR641	-0.879096	-0.00879096	chr19:40230316-40285531	TKS4_WT	TKS4_WT_T	72722.4	72083.1	-0.0127376	72722.4	72083.1	-0.0127388	-0.0137196	0.9865	0.00590291	0.999503	protein_coding,miRNA
XLOC_004879	XLOC_004879	AKT3	-42.1918	-0.421918	chr1:243124427-243851079	TKS4_WT	TKS4_WT_T	4196.08	2425.68	-0.790651	4196.08	2425.68	-0.790653	-0.147352	0.5711	0.243288	0.999503	protein_coding	chr1	243488233-243851079	-	ENSG00000117020.19
XLOC_019938	XLOC_019938	AKTIP	8.54812	0.0854812	chr16:53434470-53504411	TKS4_WT	TKS4_WT_T	16574.4	17991.2	0.118336	16574.4	17991.2	0.118335	0.0773719	0.9127	0.0396719	0.999503	protein_coding	chr16	53491040-53504411	-	ENSG00000166971.17
XLOC_055120	XLOC_055120	ALAD	-8.89632	-0.0889632	chr9:113386311-113401301	TKS4_WT	TKS4_WT_T	9989.19	9100.52	-0.134418	9989.19	9100.52	-0.134419	-0.121487	0.85695	0.0670445	0.999503	protein_coding	chr9	113386312-113401290	-	ENSG00000148218.16
XLOC_035164	XLOC_035164	ALAS1	26.2195	0.262195	chr3:52198082-52214327	TKS4_WT	TKS4_WT_T	66123.7	83461	0.335935	66123.7	83461	0.335935	0.350547	0.6373	0.195656	0.999503	protein_coding	chr3	52198086-52214327	+	ENSG00000023330.15
XLOC_038321	XLOC_038321	ALB	309.404	3.09404	chr4:73404286-73421482	TKS4_WT	TKS4_WT_T	88.9564	364.191	2.03353	88.9564	364.191	2.03352	0.855599	0.28435	0.546147	0.999503	protein_coding	chr4	73397114-73421482	+	ENSG00000163631.17
XLOC_035468	XLOC_035468	ALCAM	-33.9613	-0.339613	chr3:105366908-105576900	TKS4_WT	TKS4_WT_T	150702	99521.7	-0.598617	150702	99521.7	-0.598616	-0.629419	0.39895	0.399082	0.999503	protein_coding	chr3	105366909-105576900	+	ENSG00000170017.12
XLOC_025157	XLOC_025157	ALDH16A1	21.7255	0.217255	chr19:49453224-49471050	TKS4_WT	TKS4_WT_T	17623.1	21451.8	0.28363	17623.1	21451.8	0.283631	0.286209	0.69355	0.158922	0.999503	protein_coding	chr19	49453225-49471050	+	ENSG00000161618.10
XLOC_006778	XLOC_006778	ALDH18A1	5.36117	0.0536117	chr10:95605937-95656901	TKS4_WT	TKS4_WT_T	136071	143366	0.0753451	136071	143366	0.0753433	0.0754841	0.9224	0.0350807	0.999503	protein_coding	chr10	95605941-95656711	-	ENSG00000059573.9
XLOC_017536	XLOC_017536	ALDH1A2	23.1491	0.231491	chr15:57953423-58072705	TKS4_WT	TKS4_WT_T	88.9564	109.549	0.300406	88.9564	109.549	0.300406	0.0855749	0.7562	0.121363	0.999503	protein_coding	chr15	57953424-58497866	-	ENSG00000128918.15
XLOC_017114	XLOC_017114	ALDH1A3	-39.3249	-0.393249	chr15:100879830-101151839	TKS4_WT	TKS4_WT_T	342966	208095	-0.72082	342966	208095	-0.720823	-0.644127	0.3643	0.438541	0.999503	protein_coding	chr15	100877714-100916626	+	ENSG00000184254.17
XLOC_053474	XLOC_053474	ALDH1B1	58.1653	0.581653	chr9:38392701-38398665	TKS4_WT	TKS4_WT_T	76272.1	120636	0.661435	76272.1	120636	0.661433	0.704584	0.30595	0.51435	0.999503	protein_coding	chr9	38392702-38398661	+	ENSG00000137124.8
XLOC_037017	XLOC_037017	ALDH1L1	578.416	5.78416	chr3:126006356-126210169	TKS4_WT	TKS4_WT_T	62.4884	423.931	2.76217	62.4884	423.931	2.76217	0.657747	0.01795	1.74594	0.999503	protein_coding	chr3	126103562-126197994	-	ENSG00000144908.14
XLOC_012291	XLOC_012291	ALDH1L2	-20.5024	-0.205024	chr12:105019783-105084609	TKS4_WT	TKS4_WT_T	1589.08	1263.28	-0.331013	1589.08	1263.28	-0.331017	-0.218007	0.72485	0.139752	0.999503	protein_coding	chr12	105019784-105107643	-	ENSG00000136010.14
XLOC_011124	XLOC_011124	ALDH2	-19.655	-0.19655	chr12:111766932-111817532	TKS4_WT	TKS4_WT_T	17363	13950.3	-0.315721	17363	13950.3	-0.31572	-0.30123	0.655	0.183759	0.999503	protein_coding	chr12	111766887-111817532	+	ENSG00000111275.13
XLOC_021950	XLOC_021950	ALDH3A1	495.592	4.95592	chr17:19737983-19748390	TKS4_WT	TKS4_WT_T	141.893	845.104	2.57433	141.893	845.104	2.57433	1.44596	0.2128	0.672028	0.999503	protein_coding	chr17	19737984-19748943	-	ENSG00000108602.18
XLOC_020807	XLOC_020807	ALDH3A2	-21.5308	-0.215308	chr17:19648135-19677596	TKS4_WT	TKS4_WT_T	85006.2	66703.7	-0.3498	85006.2	66703.7	-0.349801	-0.362369	0.6127	0.212752	0.999503	protein_coding	chr17	19648136-19685760	+	ENSG00000072210.19
XLOC_007934	XLOC_007934	ALDH3B1	-26.8717	-0.268717	chr11:68008546-68029276	TKS4_WT	TKS4_WT_T	9765.7	7141.49	-0.451499	9765.7	7141.49	-0.451498	-0.393649	0.5508	0.259006	0.999503	protein_coding	chr11	68008578-68029282	+	ENSG00000006534.17
XLOC_002737	XLOC_002737	ALDH4A1	54.3339	0.543339	chr1:18871429-18902580	TKS4_WT	TKS4_WT_T	14398.2	22221.3	0.626051	14398.2	22221.3	0.626055	0.671732	0.38595	0.413469	0.999503	protein_coding	chr1	18871430-18902724	-	ENSG00000159423.17
XLOC_043163	XLOC_043163	ALDH5A1	4.19898	0.0419898	chr6:24402935-24537207	TKS4_WT	TKS4_WT_T	10831.2	11286	0.0593404	10831.2	11286	0.0593412	0.0227891	0.97785	0.00972776	0.999503	protein_coding	chr6	24494867-24537207	+	ENSG00000112294.14
XLOC_015547	XLOC_015547	ALDH6A1	-2.57345	-0.0257345	chr14:74019348-74084453	TKS4_WT	TKS4_WT_T	19456.4	18955.7	-0.0376138	19456.4	18955.7	-0.0376131	-0.0351884	0.9602	0.0176383	0.999503	protein_coding	chr14	74056847-74084492	-	ENSG00000119711.13
XLOC_042326	XLOC_042326	ALDH7A1	26.5022	0.265022	chr5:126541840-126595219	TKS4_WT	TKS4_WT_T	37556.1	47509.3	0.33916	37556.1	47509.3	0.339163	0.348706	0.6035	0.219323	0.999503	protein_coding	chr5	126531200-126595362	-	ENSG00000164904.18
XLOC_045637	XLOC_045637	ALDH8A1	6.88652	0.0688652	chr6:134917392-134950101	TKS4_WT	TKS4_WT_T	2120.23	2266.24	0.0960848	2120.23	2266.24	0.0960799	0.0692901	0.92875	0.0321012	0.999503	protein_coding	chr6	134917393-134950115	-	ENSG00000118514.14
XLOC_004171	XLOC_004171	ALDH9A1	32.7337	0.327337	chr1:165662211-165698663	TKS4_WT	TKS4_WT_T	48352.3	64179.8	0.408536	48352.3	64179.8	0.408535	0.448187	0.53145	0.274538	0.999503	protein_coding	chr1	165662216-165698562	-	ENSG00000143149.13
XLOC_018792	XLOC_018792	ALDOA,LOC112694756	3.33718	0.0333718	chr16:30053150-30072207	TKS4_WT	TKS4_WT_T	736040	760603	0.0473598	736040	760603	0.0473595	0.0405082	0.95515	0.0199284	0.999503	protein_coding,-
XLOC_022020	XLOC_022020	ALDOC	37.3971	0.373971	chr17:28573114-28576963	TKS4_WT	TKS4_WT_T	17674.9	24284.8	0.458354	17674.9	24284.8	0.458352	0.44261	0.5371	0.269945	0.999503	protein_coding	chr17	28573115-28576948	-	ENSG00000109107.14
XLOC_018558	XLOC_018558	ALG1	71.8572	0.718572	chr16:5071824-5097795	TKS4_WT	TKS4_WT_T	36306.6	62395.5	0.78121	36306.6	62395.5	0.78121	0.624321	0.56175	0.250457	0.999503	protein_coding	chr16	5033702-5087379	+	ENSG00000033011.14
XLOC_010450	XLOC_010450	ALG10	-9.69914	-0.0969914	chr12:34022314-34035296	TKS4_WT	TKS4_WT_T	23180.4	20932.1	-0.147188	23180.4	20932.1	-0.147188	-0.144846	0.8522	0.0694585	0.999503	protein_coding	chr12	34022468-34029694	+	ENSG00000139133.7
XLOC_010457	XLOC_010457	ALG10B	-28.1632	-0.281632	chr12:38316678-38329725	TKS4_WT	TKS4_WT_T	12853.1	9233.25	-0.477208	12853.1	9233.25	-0.477206	-0.428063	0.5575	0.253755	0.999503	protein_coding	chr12	38316762-38329721	+	ENSG00000175548.9
XLOC_013027	XLOC_013027	ALG11,UTP14C	-0.170595	-0.00170595	chr13:52012397-52033600	TKS4_WT	TKS4_WT_T	40212.3	40143.7	-0.00246287	40212.3	40143.7	-0.00246326	-0.00258081	0.99715	0.00123951	0.999508	protein_coding,protein_coding
XLOC_034443	XLOC_034443	ALG12	-9.24281	-0.0924281	chr22:49853843-49918469	TKS4_WT	TKS4_WT_T	15614.3	14171.1	-0.139916	15614.3	14171.1	-0.139916	-0.0705769	0.9391	0.0272882	0.999503	protein_coding	chr22	49900229-49918438	-	ENSG00000182858.14
XLOC_056311	XLOC_056311	ALG13	-28.8578	-0.288578	chrX:111680740-111764164	TKS4_WT	TKS4_WT_T	36626.2	26056.7	-0.491223	36626.2	26056.7	-0.491222	-0.5352	0.41765	0.379188	0.999503	protein_coding	chrX	111665811-111760649	+	ENSG00000101901.12
XLOC_003483	XLOC_003483	ALG14	-20.1732	-0.201732	chr1:94974404-95072974	TKS4_WT	TKS4_WT_T	13929.9	11119.8	-0.325062	13929.9	11119.8	-0.325054	-0.299297	0.6608	0.17993	0.999503	protein_coding	chr1	94974405-95072951	-	ENSG00000172339.10
XLOC_054991	XLOC_054991	ALG2	37.3699	0.373699	chr9:99216424-99221942	TKS4_WT	TKS4_WT_T	28269.8	38834.2	0.458062	28269.8	38834.2	0.458066	0.461241	0.54545	0.263245	0.999503	protein_coding	chr9	99216425-99221942	-	ENSG00000119523.10
XLOC_037471	XLOC_037471	ALG3	55.1999	0.551999	chr3:184229592-184293031	TKS4_WT	TKS4_WT_T	25071.6	38911.1	0.634128	25071.6	38911.1	0.634128	0.509563	0.4605	0.33677	0.999503	protein_coding	chr3	184242301-184249548	-	ENSG00000214160.10
XLOC_013559	XLOC_013559	ALG5	69.6053	0.696053	chr13:36949737-36999367	TKS4_WT	TKS4_WT_T	24266.4	41157.1	0.76218	24266.4	41157.1	0.762181	0.745406	0.28155	0.550444	0.999503	protein_coding	chr13	36949738-37000763	-	ENSG00000120697.10
XLOC_000825	XLOC_000825	ALG6	1.35714	0.0135714	chr1:63367626-63438553	TKS4_WT	TKS4_WT_T	19025.3	19283.5	0.0194474	19025.3	19283.5	0.0194477	0.017177	0.98155	0.00808757	0.999503	protein_coding	chr1	63367575-63438553	+	ENSG00000088035.18
XLOC_009501	XLOC_009501	ALG8	-4.40671	-0.0440671	chr11:78100941-78139643	TKS4_WT	TKS4_WT_T	33793.9	32304.7	-0.0650176	33793.9	32304.7	-0.0650188	-0.0690603	0.9227	0.0349395	0.999503	protein_coding	chr11	78095244-78139660	-	ENSG00000159063.14
XLOC_009714	XLOC_009714	ALG9	6.00387	0.0600387	chr11:111776095-111871581	TKS4_WT	TKS4_WT_T	25022.2	26524.5	0.0841138	25022.2	26524.5	0.0841169	0.0879727	0.9044	0.0436394	0.999503	protein_coding	chr11	111782195-111871581	-	ENSG00000086848.15
XLOC_029660	XLOC_029660	ALK	-75.3507	-0.753507	chr2:29190991-29921589	TKS4_WT	TKS4_WT_T	115.424	28.4512	-2.02039	115.424	28.4512	-2.02038	-0.858474	0.2842	0.546376	0.999503	protein_coding	chr2	29192774-29921586	-	ENSG00000171094.18
XLOC_029437	XLOC_029437	ALKAL2	56802.4	568.024	chr2:279557-314845	TKS4_WT	TKS4_WT_T	0	56.9024		0.1	56.9024	9.15235	0	1	0	1	protein_coding	chr2	279558-288851	-	ENSG00000189292.16
XLOC_015598	XLOC_015598	ALKBH1	0.987071	0.00987071	chr14:77672403-77708038	TKS4_WT	TKS4_WT_T	27921	28196.6	0.0141735	27921	28196.6	0.0141706	0.0139003	0.98405	0.00698283	0.999503	protein_coding	chr14	77672404-77708023	-	ENSG00000100601.10
XLOC_012324	XLOC_012324	ALKBH2	107.441	1.07441	chr12:109088187-109093631	TKS4_WT	TKS4_WT_T	21670.2	44952.8	1.0527	21670.2	44952.8	1.0527	1.02577	0.14945	0.825504	0.999503	protein_coding	chr12	109088188-109093631	-	ENSG00000189046.11
XLOC_007522	XLOC_007522	ALKBH3	-4.81187	-0.0481187	chr11:43880830-43920944	TKS4_WT	TKS4_WT_T	25453.7	24228.9	-0.0711445	25453.7	24228.9	-0.0711465	-0.0649385	0.92995	0.0315404	0.999503	protein_coding	chr11	43880811-43920274	+	ENSG00000166199.13
XLOC_050161	XLOC_050161	ALKBH4	17.1932	0.171932	chr7:102433574-102464863	TKS4_WT	TKS4_WT_T	14430.1	16911.1	0.228897	14430.1	16911.1	0.228889	0.15486	0.8205	0.0859214	0.999503	protein_coding	chr7	102456238-102464863	-	ENSG00000160993.4
XLOC_020756	XLOC_020756	ALKBH5	44.4451	0.444451	chr17:18183827-18209954	TKS4_WT	TKS4_WT_T	149697	216230	0.530526	149697	216230	0.530521	0.54122	0.4495	0.34727	0.999503	protein_coding	chr17	18183078-18209954	+	ENSG00000091542.9
XLOC_026045	XLOC_026045	ALKBH6	-6.79741	-0.0679741	chr19:36009119-36014255	TKS4_WT	TKS4_WT_T	7271.74	6777.45	-0.101557	7271.74	6777.45	-0.101558	-0.0952127	0.8934	0.0489541	0.999503	protein_coding	chr19	36009120-36014239	-	ENSG00000239382.11
XLOC_024370	XLOC_024370	ALKBH7	60.0388	0.600388	chr19:6372793-6375916	TKS4_WT	TKS4_WT_T	18164.6	29070.4	0.67842	18164.6	29070.4	0.678421	0.682381	0.33855	0.470377	0.999503	protein_coding	chr19	6372794-6375250	+	ENSG00000125652.8
XLOC_009682	XLOC_009682	ALKBH8	4.03395	0.0403395	chr11:107502725-107565737	TKS4_WT	TKS4_WT_T	20570.4	21400.2	0.0570518	20570.4	21400.2	0.0570544	0.0544044	0.94485	0.0246371	0.999503	protein_coding	chr11	107502727-107565742	-	ENSG00000137760.15
XLOC_027622	XLOC_027622	ALLC	83835	838.35	chr2:3645367-3703500	TKS4_WT	TKS4_WT_T	0	83.935		0.1	83.935	9.71313	0	1	0	1	protein_coding	chr2	3658200-3702671	+	ENSG00000151360.10
XLOC_028133	XLOC_028133	ALMS1	-34.2845	-0.342845	chr2:73385757-73609919	TKS4_WT	TKS4_WT_T	113936	74873.6	-0.605691	113936	74873.6	-0.605695	-0.622702	0.37725	0.423371	0.999503	protein_coding	chr2	73385758-73625166	+	ENSG00000116127.20
XLOC_020601	XLOC_020601	ALOX12	5.06654	0.0506654	chr17:6985122-7012334	TKS4_WT	TKS4_WT_T	213.933	224.772	0.0713045	213.933	224.772	0.0713033	0.032619	0.9361	0.0286778	0.999503	protein_coding	chr17	6996049-7010754	+	ENSG00000108839.12
XLOC_021798	XLOC_021798	ALOX12B	162.84	1.6284	chr17:8072635-8087716	TKS4_WT	TKS4_WT_T	343.686	903.345	1.39419	343.686	903.345	1.39419	0.599929	0.6437	0.191316	0.999503	protein_coding	chr17	8072636-8087716	-	ENSG00000179477.11
XLOC_021728	XLOC_021728	ALOX15	42.018	0.42018	chr17:4630918-4641678	TKS4_WT	TKS4_WT_T	120.201	170.707	0.506079	120.201	170.707	0.506073	0.301832	0.75165	0.123984	0.999503	protein_coding	chr17	4630919-4642294	-	ENSG00000161905.13
XLOC_020644	XLOC_020644	ALOX15B	1052.01	10.5201	chr17:8039058-8049134	TKS4_WT	TKS4_WT_T	31.2442	359.935	3.52608	31.2442	359.935	3.52608	3.23694	0.23185	0.634793	0.999503	protein_coding	chr17	8039034-8049134	+	ENSG00000179593.16
XLOC_005312	XLOC_005312	ALOX5	-20.231	-0.20231	chr10:45374208-45453121	TKS4_WT	TKS4_WT_T	601.003	479.414	-0.326099	601.003	479.414	-0.3261	-0.163668	0.71245	0.147246	0.999503	protein_coding	chr10	45374176-45446119	+	ENSG00000012779.12
XLOC_012866	XLOC_012866	ALOX5AP	28351.2	283.512	chr13:30713484-30764426	TKS4_WT	TKS4_WT_T	0	28.4512		0.1	28.4512	8.15235	0	1	0	1	protein_coding	chr13	30713478-30764426	+	ENSG00000132965.10
XLOC_021799	XLOC_021799	ALOXE3	-7.1642	-0.071642	chr17:8095899-8118916	TKS4_WT	TKS4_WT_T	2269.48	2106.89	-0.107251	2269.48	2106.89	-0.107247	-0.0828761	0.9072	0.042297	0.999503	protein_coding	chr17	8095900-8119047	-	ENSG00000179148.10
XLOC_029322	XLOC_029322	ALPG	42.5189	0.425189	chr2:232406843-232414516	TKS4_WT	TKS4_WT_T	312.442	445.289	0.511154	312.442	445.289	0.511154	0.461061	0.65025	0.18692	0.999503	protein_coding	chr2	232406844-232410714	+	ENSG00000163286.9
XLOC_038564	XLOC_038564	ALPK1	-12.7504	-0.127504	chr4:112297368-112442621	TKS4_WT	TKS4_WT_T	15389.3	13427.1	-0.196779	15389.3	13427.1	-0.19678	-0.174265	0.81665	0.087964	0.999503	protein_coding	chr4	112285509-112442621	+	ENSG00000073331.18
XLOC_024077	XLOC_024077	ALPK2	347.496	3.47496	chr18:58481246-58629091	TKS4_WT	TKS4_WT_T	425.678	1904.89	2.16188	425.678	1904.89	2.16187	1.43322	0.05745	1.24071	0.999503	protein_coding	chr18	58481247-58629091	-	ENSG00000198796.7
XLOC_016972	XLOC_016972	ALPK3	-33.0859	-0.330859	chr15:84817355-84873479	TKS4_WT	TKS4_WT_T	2006.99	1342.96	-0.579618	2006.99	1342.96	-0.579617	-0.337363	0.6423	0.192262	0.999503	protein_coding	chr15	84817356-84873479	+	ENSG00000136383.7
XLOC_000308	XLOC_000308	ALPL	144.22	1.4422	chr1:21508983-21578412	TKS4_WT	TKS4_WT_T	319.805	781.029	1.28818	319.805	781.029	1.28818	0.731716	0.0979	1.00922	0.999503	protein_coding	chr1	21509397-21578410	+	ENSG00000162551.14
XLOC_029321	XLOC_029321	ALPP	26.4228	0.264228	chr2:232378750-232382889	TKS4_WT	TKS4_WT_T	863.096	1091.15	0.338263	863.096	1091.15	0.338257	0.239395	0.7405	0.130475	0.999503	protein_coding	chr2	232378724-232382889	+	ENSG00000163283.7
XLOC_030991	XLOC_030991	ALS2,MPP4	-30.0048	-0.300048	chr2:201644873-201781153	TKS4_WT	TKS4_WT_T	57103.5	39969.7	-0.514672	57103.5	39969.7	-0.514672	-0.574337	0.49485	0.305526	0.999503	protein_coding,protein_coding
XLOC_036497	XLOC_036497	ALS2CL	-11.7811	-0.117811	chr3:46668994-46693693	TKS4_WT	TKS4_WT_T	13532.7	11938.4	-0.180843	13532.7	11938.4	-0.18084	-0.141558	0.80985	0.0915954	0.999503	protein_coding	chr3	46668995-46693704	-	ENSG00000178038.17
XLOC_003570	XLOC_003570	ALX3	-3.00882	-0.0300882	chr1:110059869-110070672	TKS4_WT	TKS4_WT_T	146.669	142.256	-0.0440714	146.669	142.256	-0.0440745	-0.0271277	0.9115	0.0402433	0.999503	protein_coding	chr1	110059870-110070672	-	ENSG00000156150.9
XLOC_008979	XLOC_008979	ALX4	-84.8232	-0.848232	chr11:44260439-44310139	TKS4_WT	TKS4_WT_T	187.465	28.4512	-2.72006	187.465	28.4512	-2.72006	0	1	0	1	protein_coding	chr11	44260440-44310139	-	ENSG00000052850.8
XLOC_022824	XLOC_022824	ALYREF	-9.00088	-0.0900088	chr17:81887834-81900533	TKS4_WT	TKS4_WT_T	102520	93292.3	-0.136076	102520	93292.3	-0.136075	-0.117931	0.86975	0.0606056	0.999503	protein_coding	chr17	81887835-81891586	-	ENSG00000183684.8
XLOC_038301	XLOC_038301	AMBN	26932.6	269.326	chr4:70592255-70607288	TKS4_WT	TKS4_WT_T	0	27.0326		0.1	27.0326	8.07856	0	1	0	1	protein_coding	chr4	70592256-70607288	+	ENSG00000178522.15
XLOC_055125	XLOC_055125	AMBP	28351.2	283.512	chr9:114060126-114078300	TKS4_WT	TKS4_WT_T	0	28.4512		0.1	28.4512	8.15235	0	1	0	1	protein_coding	chr9	114060127-114078328	-	ENSG00000106927.12
XLOC_008998	XLOC_008998	AMBRA1	11.1687	0.111687	chr11:46396411-46594055	TKS4_WT	TKS4_WT_T	36936.4	41061.7	0.152749	36936.4	41061.7	0.15275	0.152972	0.8409	0.0752556	0.999503	protein_coding	chr11	46396414-46594125	-	ENSG00000110497.15
XLOC_044019	XLOC_044019	AMD1	12.9697	0.129697	chr6:110609977-110895713	TKS4_WT	TKS4_WT_T	199643	225536	0.175939	199643	225536	0.175935	0.150671	0.8366	0.0774821	0.999503	protein_coding	chr6	110874770-110898879	+	ENSG00000123505.19
XLOC_010984	XLOC_010984	AMDHD1	40.0537	0.400537	chr12:95943330-95968720	TKS4_WT	TKS4_WT_T	2433.86	3408.71	0.485976	2433.86	3408.71	0.48598	0.413933	0.539	0.268411	0.999503	protein_coding	chr12	95943331-95968720	+	ENSG00000139344.8
XLOC_018491	XLOC_018491	AMDHD2	62.9717	0.629717	chr16:2520361-2531422	TKS4_WT	TKS4_WT_T	19181	31259.6	0.704624	19181	31259.6	0.704621	0.690046	0.3174	0.498393	0.999503	protein_coding	chr16	2520357-2531422	+	ENSG00000162066.16
XLOC_057057	XLOC_057057	AMER1	-5.06919	-0.0506919	chrX:64185116-64205708	TKS4_WT	TKS4_WT_T	9150.37	8686.52	-0.0750516	9150.37	8686.52	-0.0750518	-0.0679427	0.92135	0.0355754	0.999503	protein_coding	chrX	64185117-64205708	-	ENSG00000184675.11
XLOC_019961	XLOC_019961	AMFR	-9.62445	-0.0962445	chr16:56361451-56425545	TKS4_WT	TKS4_WT_T	95870.4	86643.4	-0.145996	95870.4	86643.4	-0.145996	-0.156633	0.81815	0.0871671	0.999503	protein_coding	chr16	56361452-56425545	-	ENSG00000159461.15
XLOC_024296	XLOC_024296	AMH,MIR4321	16.0217	0.160217	chr19:2249322-2252073	TKS4_WT	TKS4_WT_T	4789.32	5556.65	0.214396	4789.32	5556.65	0.214395	0.165985	0.8047	0.094366	0.999503	protein_coding,miRNA
XLOC_003562	XLOC_003562	AMIGO1	-99.9295	-0.999295	chr1:109504177-109509742	TKS4_WT	TKS4_WT_T	141.893	0		141.893	0.1	-10.4706		0.0576	1.23958	0.999503	protein_coding	chr1	109504178-109509738	-	ENSG00000181754.7
XLOC_011758	XLOC_011758	AMIGO2	237.02	2.3702	chr12:47075706-47236663	TKS4_WT	TKS4_WT_T	2139.73	7211.32	1.75283	2139.73	7211.32	1.75283	1.2037	0.1678	0.775208	0.999503	protein_coding	chr12	47075707-47079959	-	ENSG00000139211.7
XLOC_036559	XLOC_036559	AMIGO3	46.456	0.46456	chr3:49673101-49723951	TKS4_WT	TKS4_WT_T	2647	3876.69	0.550468	2647	3876.69	0.550467	0.0755168	0.77085	0.11303	0.999503	protein_coding	chr3	49716829-49719684	-	ENSG00000176020.9
XLOC_057347	XLOC_057347	AMMECR1	-24.0814	-0.240814	chrX:110194185-110456334	TKS4_WT	TKS4_WT_T	41205.2	31282.4	-0.397474	41205.2	31282.4	-0.397475	-0.398729	0.57085	0.243478	0.999503	protein_coding	chrX	110194186-110440318	-	ENSG00000101935.12
XLOC_030477	XLOC_030477	AMMECR1L	6.85326	0.0685326	chr2:127858309-127887575	TKS4_WT	TKS4_WT_T	34334	36687	0.0956309	34334	36687	0.095631	0.0977498	0.88615	0.0524928	0.999503	protein_coding	chr2	127861630-127885967	-	ENSG00000144233.11
XLOC_014958	XLOC_014958	AMN	-60.7657	-0.607657	chr14:102922429-103057549	TKS4_WT	TKS4_WT_T	1305.29	512.121	-1.34981	1305.29	512.121	-1.34981	-0.204757	0.5462	0.262648	0.999503	protein_coding	chr14	102922663-102933596	+	ENSG00000166126.11
XLOC_011683	XLOC_011683	AMN1	-27.3275	-0.273275	chr12:31647159-31729174	TKS4_WT	TKS4_WT_T	18785.5	13651.9	-0.460525	18785.5	13651.9	-0.460518	-0.40038	0.6277	0.202248	0.999503	protein_coding	chr12	31671142-31729121	-	ENSG00000151743.11
XLOC_057361	XLOC_057361	AMOT	-33.4723	-0.334723	chrX:112774876-112840945	TKS4_WT	TKS4_WT_T	12201.8	8117.58	-0.587968	12201.8	8117.58	-0.587972	-0.509283	0.4677	0.330033	0.999503	protein_coding	chrX	112774503-112840831	-	ENSG00000126016.17
XLOC_008189	XLOC_008189	AMOTL1	-4.51653	-0.0451653	chr11:94543920-94876748	TKS4_WT	TKS4_WT_T	78456.2	74912.7	-0.0666765	78456.2	74912.7	-0.0666771	-0.0598652	0.93075	0.031167	0.999503	protein_coding	chr11	94706431-94876748	+	ENSG00000166025.18
XLOC_037111	XLOC_037111	AMOTL2	19.1566	0.191566	chr3:134355344-134375417	TKS4_WT	TKS4_WT_T	82774.5	98631.3	0.252859	82774.5	98631.3	0.252859	0.280198	0.7009	0.154344	0.999503	protein_coding	chr3	134355347-134375479	-	ENSG00000114019.15
XLOC_001160	XLOC_001160	AMPD2	-15.1406	-0.151406	chr1:109619836-109632055	TKS4_WT	TKS4_WT_T	42266.4	35867	-0.236857	42266.4	35867	-0.236854	-0.23355	0.73935	0.13115	0.999503	protein_coding	chr1	109616104-109632051	+	ENSG00000116337.20
XLOC_007322	XLOC_007322	AMPD3	-16.275	-0.16275	chr11:10450387-10507579	TKS4_WT	TKS4_WT_T	26125.3	21873.4	-0.256273	26125.3	21873.4	-0.25627	-0.263132	0.7389	0.131414	0.999503	protein_coding	chr11	10308313-10507579	+	ENSG00000133805.16
XLOC_036555	XLOC_036555	AMT,NICN1	62.8852	0.628852	chr3:49416777-49429324	TKS4_WT	TKS4_WT_T	4582.75	7464.62	0.703855	4582.75	7464.62	0.703855	0.605983	0.3991	0.398918	0.999503	protein_coding,protein_coding
XLOC_001109	XLOC_001109	AMY2B,RNPC3	-20.3661	-0.203661	chr1:103525698-103579534	TKS4_WT	TKS4_WT_T	8566.49	6821.83	-0.328545	8566.49	6821.83	-0.328545	-0.284028	0.69705	0.156736	0.999503	protein_coding,protein_coding
XLOC_048036	XLOC_048036	AMZ1	-26.9679	-0.269679	chr7:2679521-2844308	TKS4_WT	TKS4_WT_T	1745.3	1274.63	-0.453395	1745.3	1274.63	-0.453397	-0.0790434	0.7374	0.132297	0.999503	protein_coding	chr7	2679522-2775500	+	ENSG00000174945.14
XLOC_021452	XLOC_021452	AMZ2	32.6343	0.326343	chr17:68206128-68257164	TKS4_WT	TKS4_WT_T	84420.1	111970	0.407454	84420.1	111970	0.407454	0.387725	0.5895	0.229516	0.999503	protein_coding	chr17	68205481-68257712	+	ENSG00000196704.14
XLOC_030380	XLOC_030380	ANAPC1	-10.1255	-0.101255	chr2:111766149-111884196	TKS4_WT	TKS4_WT_T	136942	123076	-0.154023	136942	123076	-0.154016	-0.163526	0.81965	0.0863716	0.999503	protein_coding	chr2	111611639-111884690	-	ENSG00000153107.13
XLOC_039916	XLOC_039916	ANAPC10	-3.00514	-0.0300514	chr4:144967116-145129524	TKS4_WT	TKS4_WT_T	31143.3	30207.4	-0.0440218	31143.3	30207.4	-0.0440198	-0.0100655	0.9583	0.0184985	0.999503	protein_coding	chr4	144831908-145098541	-	ENSG00000164162.14
XLOC_021620	XLOC_021620	ANAPC11	25.1047	0.251047	chr17:81887834-81900533	TKS4_WT	TKS4_WT_T	36931.3	46202.8	0.323138	36931.3	46202.8	0.323136	0.183224	0.77585	0.110222	0.999503	protein_coding	chr17	81890790-81900991	+	ENSG00000141552.18
XLOC_037113	XLOC_037113	ANAPC13	14.2059	0.142059	chr3:134477703-135260467	TKS4_WT	TKS4_WT_T	40580.9	46345.8	0.19164	40580.9	46345.8	0.191638	0.185683	0.8283	0.0818123	0.999503	protein_coding	chr3	134477706-134486716	-	ENSG00000129055.13
XLOC_009426	XLOC_009426	ANAPC15	3.23439	0.0323439	chr11:71997943-72112780	TKS4_WT	TKS4_WT_T	10147.2	10475.4	0.0459236	10147.2	10475.4	0.0459236	0.0132891	0.96675	0.0146858	0.999503	protein_coding	chr11	72106378-72112780	-	ENSG00000110200.9
XLOC_005493	XLOC_005493	ANAPC16	19.4249	0.194249	chr10:72096031-72235860	TKS4_WT	TKS4_WT_T	46548.1	55590	0.256104	46548.1	55590	0.256103	0.213274	0.78535	0.104937	0.999503	protein_coding	chr10	72216000-72235860	+	ENSG00000166295.9
XLOC_055394	XLOC_055394	ANAPC2	15.4047	0.154047	chr9:137174783-137188585	TKS4_WT	TKS4_WT_T	27781.7	32061.4	0.206706	27781.7	32061.4	0.206703	0.202949	0.77545	0.110446	0.999503	protein_coding	chr9	137174784-137188560	-	ENSG00000176248.9
XLOC_038028	XLOC_038028	ANAPC4	-22.8755	-0.228755	chr4:25377262-25418498	TKS4_WT	TKS4_WT_T	38885.7	29990.4	-0.374739	38885.7	29990.4	-0.374739	-0.362972	0.61775	0.209187	0.999503	protein_coding	chr4	25377263-25418498	+	ENSG00000053900.11
XLOC_012460	XLOC_012460	ANAPC5	16.7758	0.167758	chr12:121308244-121354209	TKS4_WT	TKS4_WT_T	172260	201158	0.223741	172260	201158	0.223741	0.212398	0.76665	0.115403	0.999503	protein_coding	chr12	121308245-121399896	-	ENSG00000089053.13
XLOC_012341	XLOC_012341	ANAPC7	-15.9705	-0.159705	chr12:110372899-110403730	TKS4_WT	TKS4_WT_T	79329.5	66660.2	-0.251032	79329.5	66660.2	-0.251032	-0.266398	0.7556	0.121708	0.999503	protein_coding	chr12	110372900-110403730	-	ENSG00000196510.14
XLOC_014184	XLOC_014184	ANG,RNASE4	36.4556	0.364556	chr14:20684176-20701216	TKS4_WT	TKS4_WT_T	6291.03	8584.46	0.448431	6291.03	8584.46	0.448431	0.405143	0.60435	0.218711	0.999503	protein_coding,protein_coding
XLOC_015581	XLOC_015581	ANGEL1,VASH1-AS1	-10.4768	-0.104768	chr14:76761456-76812882	TKS4_WT	TKS4_WT_T	41256.9	36934.5	-0.159667	41256.9	36934.5	-0.159666	-0.123461	0.8605	0.0652491	0.999503	protein_coding,lncRNA
XLOC_004582	XLOC_004582	ANGEL2	-10.3342	-0.103342	chr1:212992181-213015872	TKS4_WT	TKS4_WT_T	31492.4	28237.9	-0.157368	31492.4	28237.9	-0.157371	-0.160568	0.8601	0.0654511	0.999503	protein_coding	chr1	212992182-213015867	-	ENSG00000174606.14
XLOC_052591	XLOC_052591	ANGPT1	26932.6	269.326	chr8:107249481-107497918	TKS4_WT	TKS4_WT_T	0	27.0326		0.1	27.0326	8.07856	0	1	0	1	protein_coding	chr8	107249482-107498055	-	ENSG00000154188.10
XLOC_051776	XLOC_051776	ANGPT2	-6.98682	-0.0698682	chr8:6406614-6708209	TKS4_WT	TKS4_WT_T	5503.36	5118.85	-0.104492	5503.36	5118.85	-0.104493	-0.0307166	0.93605	0.028701	0.999503	protein_coding	chr8	6499632-6563409	-	ENSG00000091879.14
XLOC_032003	XLOC_032003	ANGPT4	47.8952	0.478952	chr20:869899-938216	TKS4_WT	TKS4_WT_T	57.7122	85.3536	0.564574	57.7122	85.3536	0.564576	0.17736	0.71995	0.142698	0.999503	protein_coding	chr20	869900-916334	-	ENSG00000101280.8
XLOC_004293	XLOC_004293	ANGPTL1	-8.93926	-0.0893926	chr1:178724250-178921842	TKS4_WT	TKS4_WT_T	31.2442	28.4512	-0.135099	31.2442	28.4512	-0.135099	0	1	0	1	protein_coding	chr1	178849535-178871077	-	ENSG00000116194.13
XLOC_055233	XLOC_055233	ANGPTL2	-99.6799	-0.996799	chr9:126914779-127223166	TKS4_WT	TKS4_WT_T	31.2442	0		31.2442	0.1	-8.28744	0	1	0	1	protein_coding	chr9	127087348-127122635	-	ENSG00000136859.10
XLOC_024411	XLOC_024411	ANGPTL4	-10.5436	-0.105436	chr19:8364128-8374373	TKS4_WT	TKS4_WT_T	3856.37	3449.77	-0.160745	3856.37	3449.77	-0.160743	-0.121818	0.8623	0.0643416	0.999503	protein_coding	chr19	8363289-8374370	+	ENSG00000167772.12
XLOC_025686	XLOC_025686	ANGPTL6	-63.248	-0.63248	chr19:10086118-10119899	TKS4_WT	TKS4_WT_T	387.07	142.256	-1.4441	387.07	142.256	-1.4441	-0.108374	0.53435	0.272174	0.999503	protein_coding	chr19	10092338-10102678	-	ENSG00000130812.11
XLOC_000161	XLOC_000161	ANGPTL7	-99.6799	-0.996799	chr1:11106534-11299574	TKS4_WT	TKS4_WT_T	31.2442	0		31.2442	0.1	-8.28744	0	1	0	1	protein_coding	chr1	11189355-11195981	+	ENSG00000171819.5
XLOC_024467	XLOC_024467	ANGPTL8	28351.2	283.512	chr19:11199294-11262524	TKS4_WT	TKS4_WT_T	0	28.4512		0.1	28.4512	8.15235	0	1	0	1	protein_coding	chr19	11237450-11241943	+	ENSG00000130173.13
XLOC_052122	XLOC_052122	ANK1	-72.8163	-0.728163	chr8:41653224-41896741	TKS4_WT	TKS4_WT_T	2271.27	617.415	-1.87919	2271.27	617.415	-1.87919	-1.03797	0.02575	1.58922	0.999503	protein_coding	chr8	41653220-41896762	-	ENSG00000029534.21
XLOC_038572	XLOC_038572	ANK2	70.5666	0.705666	chr4:112705621-113383740	TKS4_WT	TKS4_WT_T	7995.53	13637.7	0.770339	7995.53	13637.7	0.770335	0.591243	0.3013	0.521001	0.999503	protein_coding	chr4	112818032-113384221	+	ENSG00000145362.21
XLOC_006487	XLOC_006487	ANK3	-31.2138	-0.312138	chr10:60026297-60733528	TKS4_WT	TKS4_WT_T	10684.3	7349.32	-0.539814	10684.3	7349.32	-0.53981	-0.408596	0.5018	0.299469	0.999503	protein_coding	chr10	60026298-60733490	-	ENSG00000151150.22
XLOC_028974	XLOC_028974	ANKAR,OSGEPL1-AS1	111.308	1.11308	chr2:189673119-190203484	TKS4_WT	TKS4_WT_T	639.611	1351.55	1.07935	639.611	1351.55	1.07935	0.10212	0.23215	0.634231	0.999503	protein_coding,lncRNA
XLOC_016756	XLOC_016756	ANKDD1A	-22.0854	-0.220854	chr15:64911901-64962604	TKS4_WT	TKS4_WT_T	4623.15	3602.11	-0.360032	4623.15	3602.11	-0.360034	-0.180418	0.79945	0.0972087	0.999503	protein_coding	chr15	64911902-64958691	+	ENSG00000166839.17
XLOC_040783	XLOC_040783	ANKDD1B	-4.03029	-0.0403029	chr5:75611288-75671846	TKS4_WT	TKS4_WT_T	541.102	519.294	-0.0593496	541.102	519.294	-0.059349	-0.0285122	0.95515	0.0199284	0.999503	protein_coding	chr5	75611182-75681773	+	ENSG00000189045.15
XLOC_031426	XLOC_031426	ANKEF1	0.32584	0.0032584	chr20:10023811-10307420	TKS4_WT	TKS4_WT_T	29155.4	29250.4	0.00469389	29155.4	29250.4	0.00469324	0.00468072	0.99485	0.0022424	0.999503	protein_coding	chr20	9986126-10058303	+	ENSG00000132623.16
XLOC_021308	XLOC_021308	ANKFN1	-16.9506	-0.169506	chr17:56110934-56517016	TKS4_WT	TKS4_WT_T	781.105	648.703	-0.267958	781.105	648.703	-0.267958	-0.211084	0.7744	0.111035	0.999503	protein_coding	chr17	55882301-56517016	+	ENSG00000153930.13
XLOC_021719	XLOC_021719	ANKFY1	-18.7192	-0.187192	chr17:4163817-4263979	TKS4_WT	TKS4_WT_T	77063.7	62638	-0.299015	77063.7	62638	-0.299013	-0.315746	0.64675	0.189264	0.999503	protein_coding	chr17	4163821-4263995	-	ENSG00000185722.18
XLOC_041660	XLOC_041660	ANKH,RBBP4P1	-3.61756	-0.0361756	chr5:14660793-14871778	TKS4_WT	TKS4_WT_T	31958	30801.9	-0.0531581	31958	30801.9	-0.0531578	-0.0346023	0.9717	0.0124678	0.999503	protein_coding,processed_pseudogene
XLOC_041190	XLOC_041190	ANKHD1,ANKHD1-EIF4EBP3,EIF4EBP3	-33.1344	-0.331344	chr5:140401832-140549576	TKS4_WT	TKS4_WT_T	129615	86667.8	-0.580663	129615	86667.8	-0.580665	-0.600408	0.40465	0.39292	0.999503	protein_coding,protein_coding,protein_coding
XLOC_048708	XLOC_048708	ANKIB1	-38.695	-0.38695	chr7:92198968-92401383	TKS4_WT	TKS4_WT_T	67628.6	41459.7	-0.705923	67628.6	41459.7	-0.705924	-0.560754	0.4173	0.379552	0.999503	protein_coding	chr7	92245974-92401383	+	ENSG00000001629.10
XLOC_008317	XLOC_008317	ANKK1	-69.293	-0.69293	chr11:113386013-113400416	TKS4_WT	TKS4_WT_T	829.265	254.642	-1.70336	829.265	254.642	-1.70336	-0.724911	0.2211	0.655411	0.999503	protein_coding	chr11	113387779-113400416	+	ENSG00000170209.5
XLOC_024607	XLOC_024607	ANKLE1	-4.12775	-0.0412775	chr19:17281900-17287646	TKS4_WT	TKS4_WT_T	14560	13959	-0.0608168	14560	13959	-0.0608148	-0.0586534	0.93555	0.028933	0.999503	protein_coding	chr19	17281645-17287646	+	ENSG00000160117.16
XLOC_012581	XLOC_012581	ANKLE2	-12.9862	-0.129862	chr12:132725502-132761832	TKS4_WT	TKS4_WT_T	78312.5	68142.7	-0.200684	78312.5	68142.7	-0.200683	-0.21768	0.76135	0.118416	0.999503	protein_coding	chr12	132725503-132761832	-	ENSG00000176915.15
XLOC_031303	XLOC_031303	ANKMY1	-43.1855	-0.431855	chr2:240468631-240565256	TKS4_WT	TKS4_WT_T	11102.6	6307.89	-0.815673	11102.6	6307.89	-0.815668	-0.506167	0.4795	0.319211	0.999503	protein_coding	chr2	240479422-240569209	-	ENSG00000144504.16
XLOC_049461	XLOC_049461	ANKMY2	-13.1168	-0.131168	chr7:16599778-16645816	TKS4_WT	TKS4_WT_T	45595.7	39615	-0.202848	45595.7	39615	-0.202851	-0.191926	0.79535	0.0994417	0.999503	protein_coding	chr7	16599779-16645817	-	ENSG00000106524.9
XLOC_042014	XLOC_042014	ANKRA2	11.1431	0.111431	chr5:73552189-73565639	TKS4_WT	TKS4_WT_T	8965.3	9964.31	0.152418	8965.3	9964.31	0.152418	0.147342	0.8339	0.078886	0.999503	protein_coding	chr5	73552190-73565667	-	ENSG00000164331.10
XLOC_006736	XLOC_006736	ANKRD1	25.9224	0.259224	chr10:90912095-90921087	TKS4_WT	TKS4_WT_T	1876.64	2363.11	0.332529	1876.64	2363.11	0.332535	0.191406	0.78845	0.103226	0.999503	protein_coding	chr10	90912096-90921087	-	ENSG00000148677.7
XLOC_014032	XLOC_014032	ANKRD10	-13.1661	-0.131661	chr13:110878539-110915071	TKS4_WT	TKS4_WT_T	359697	312339	-0.203671	359697	312339	-0.203669	-0.197353	0.7999	0.0969643	0.999503	protein_coding	chr13	110878540-110915069	-	ENSG00000088448.14
XLOC_020276	XLOC_020276	ANKRD11	-20.6405	-0.206405	chr16:89267618-89490561	TKS4_WT	TKS4_WT_T	174167	138218	-0.333523	174167	138218	-0.333526	-0.312356	0.70345	0.152767	0.999503	protein_coding	chr16	89267630-89490561	-	ENSG00000167522.17
XLOC_023292	XLOC_023292	ANKRD12	-8.31538	-0.0831538	chr18:9136766-9285985	TKS4_WT	TKS4_WT_T	46278.1	42429.9	-0.125247	46278.1	42429.9	-0.125248	-0.132952	0.86585	0.0625573	0.999503	protein_coding	chr18	9136228-9285985	+	ENSG00000101745.17
XLOC_011106	XLOC_011106	ANKRD13A	-4.71386	-0.0471386	chr12:109999168-110039763	TKS4_WT	TKS4_WT_T	34262.8	32647.7	-0.0696592	34262.8	32647.7	-0.0696617	-0.072599	0.92115	0.0356696	0.999503	protein_coding	chr12	109999186-110039763	+	ENSG00000076513.17
XLOC_020904	XLOC_020904	ANKRD13B	-36.0919	-0.360919	chr17:29589768-29622912	TKS4_WT	TKS4_WT_T	13692.1	8750.36	-0.645932	13692.1	8750.36	-0.645929	-0.425403	0.5371	0.269945	0.999503	protein_coding	chr17	29589769-29614761	+	ENSG00000198720.13
XLOC_003304	XLOC_003304	ANKRD13C	-22.656	-0.22656	chr1:70258998-70368023	TKS4_WT	TKS4_WT_T	55039.4	42569.7	-0.370637	55039.4	42569.7	-0.370638	-0.371212	0.631	0.199971	0.999503	protein_coding	chr1	70258999-70354734	-	ENSG00000118454.13
XLOC_007916	XLOC_007916	ANKRD13D	-29.3727	-0.293727	chr11:67289302-67302484	TKS4_WT	TKS4_WT_T	19063.3	13463.9	-0.501707	19063.3	13463.9	-0.501702	-0.457425	0.50505	0.296666	0.999503	protein_coding	chr11	67289300-67302485	+	ENSG00000172932.16
XLOC_006097	XLOC_006097	ANKRD16,RPL12P28	11.3075	0.113075	chr10:5861615-5945942	TKS4_WT	TKS4_WT_T	6781.78	7548.63	0.15455	6781.78	7548.63	0.154551	0.0557274	0.9165	0.0378675	0.999503	protein_coding,processed_pseudogene
XLOC_039478	XLOC_039478	ANKRD17	-20.3733	-0.203733	chr4:73069872-73369942	TKS4_WT	TKS4_WT_T	194995	155268	-0.328678	194995	155268	-0.328677	-0.33935	0.65915	0.181016	0.999503	protein_coding	chr4	73073376-73258798	-	ENSG00000132466.20
XLOC_005721	XLOC_005721	ANKRD2	-0.558591	-0.00558591	chr10:97572440-97583884	TKS4_WT	TKS4_WT_T	543.689	540.652	-0.00808218	543.689	540.652	-0.00808136	-0.00534651	0.9338	0.0297461	0.999503	protein_coding	chr10	97572499-97583884	+	ENSG00000165887.12
XLOC_053628	XLOC_053628	ANKRD20A1	109.767	1.09767	chr9:67858930-67902394	TKS4_WT	TKS4_WT_T	704.686	1478.2	1.06879	704.686	1478.2	1.06879	0.764344	0.3012	0.521145	0.999503	protein_coding	chr9	67832765-67920552	+	ENSG00000260691.7
XLOC_053502	XLOC_053502	ANKRD20A2P	-34.4303	-0.344303	chr9:40223284-40282358	TKS4_WT	TKS4_WT_T	423.09	277.419	-0.608899	423.09	277.419	-0.608898	-0.302631	0.51465	0.288488	0.999503	protein_coding	chr9	40223285-40266845	+	ENSG00000183148.7
XLOC_054713	XLOC_054713	ANKRD20A3P	44.6173	0.446173	chr9:66093945-66154762	TKS4_WT	TKS4_WT_T	173.137	250.386	0.532244	173.137	250.386	0.53224	0.242763	0.64525	0.190272	0.999503	protein_coding	chr9	66106815-66179474	-	ENSG00000276203.5
XLOC_006716	XLOC_006716	ANKRD22	-70.3605	-0.703605	chr10:88802729-88851844	TKS4_WT	TKS4_WT_T	1420.72	421.094	-1.7544	1420.72	421.094	-1.75441	-0.954212	0.1973	0.704873	0.999503	protein_coding	chr10	88819896-88851844	-	ENSG00000152766.6
XLOC_030247	XLOC_030247	ANKRD23	12.8919	0.128919	chr2:96837911-96844021	TKS4_WT	TKS4_WT_T	2492.57	2813.91	0.174942	2492.57	2813.91	0.174942	0.124598	0.8561	0.0674755	0.999503	protein_coding	chr2	96824526-96857934	-	ENSG00000163126.15
XLOC_024331	XLOC_024331	ANKRD24	-49.3891	-0.493891	chr19:4182617-4224814	TKS4_WT	TKS4_WT_T	1560.02	789.54	-0.98248	1560.02	789.54	-0.98248	-0.55085	0.30925	0.50969	0.999503	protein_coding	chr19	4182689-4224814	+	ENSG00000089847.13
XLOC_025991	XLOC_025991	ANKRD27	-15.6047	-0.156047	chr19:32597004-32675215	TKS4_WT	TKS4_WT_T	82765.9	69850.5	-0.244767	82765.9	69850.5	-0.244766	-0.26457	0.7166	0.144723	0.999503	protein_coding	chr19	32597006-32676597	-	ENSG00000105186.16
XLOC_036301	XLOC_036301	ANKRD28	-21.465	-0.21465	chr3:15560698-15859814	TKS4_WT	TKS4_WT_T	95171.7	74743.1	-0.348593	95171.7	74743.1	-0.348592	-0.20767	0.66915	0.174477	0.999503	protein_coding	chr3	15667236-15859771	-	ENSG00000206560.12
XLOC_023869	XLOC_023869	ANKRD29	-23.3102	-0.233102	chr18:23598925-23662914	TKS4_WT	TKS4_WT_T	6325.86	4851.29	-0.382894	6325.86	4851.29	-0.382893	-0.331969	0.60805	0.216061	0.999503	protein_coding	chr18	23598926-23662911	-	ENSG00000154065.17
XLOC_042027	XLOC_042027	ANKRD31	28.2463	0.282463	chr5:75068296-75236922	TKS4_WT	TKS4_WT_T	1245.79	1597.68	0.358921	1245.79	1597.68	0.358918	0.241751	0.6107	0.214172	0.999503	protein_coding	chr5	75068275-75236911	-	ENSG00000145700.10
XLOC_040421	XLOC_040421	ANKRD33B	6.3732	0.063732	chr5:10564069-10657816	TKS4_WT	TKS4_WT_T	45258.3	48142.7	0.089135	45258.3	48142.7	0.0891347	0.0968224	0.8913	0.0499761	0.999503	protein_coding	chr5	10564070-10657816	+	ENSG00000164236.12
XLOC_003779	XLOC_003779	ANKRD34A	25.1501	0.251501	chr1:145959036-145978848	TKS4_WT	TKS4_WT_T	1106.08	1384.26	0.323651	1106.08	1384.26	0.323659	0.123095	0.6862	0.163549	0.999503	protein_coding	chr1	145959441-145964575	-	ENSG00000272031.3
XLOC_042075	XLOC_042075	ANKRD34B	28351.2	283.512	chr5:80556754-80570292	TKS4_WT	TKS4_WT_T	0	28.4512		0.1	28.4512	8.15235	0	1	0	1	protein_coding	chr5	80556755-80570280	-	ENSG00000189127.8
XLOC_028331	XLOC_028331	ANKRD36	-27.7788	-0.277788	chr2:97113152-97264521	TKS4_WT	TKS4_WT_T	34587.5	24979.5	-0.469506	34587.5	24979.5	-0.469506	-0.499106	0.5307	0.275151	0.999503	protein_coding	chr2	97113153-97264521	+	ENSG00000135976.21
XLOC_030260	XLOC_030260	ANKRD36B	-15.1367	-0.151367	chr2:97492662-97590337	TKS4_WT	TKS4_WT_T	17668.3	14993.9	-0.236783	17668.3	14993.9	-0.236788	-0.22304	0.73245	0.135222	0.999503	protein_coding	chr2	97492663-97589877	-	ENSG00000196912.13
XLOC_030232	XLOC_030232	ANKRD36C	-26.1371	-0.261371	chr2:95848931-95991824	TKS4_WT	TKS4_WT_T	28578.1	21108.6	-0.43708	28578.1	21108.6	-0.437079	-0.439933	0.5244	0.280337	0.999503	protein_coding	chr2	95836919-95991831	-	ENSG00000174501.15
XLOC_038973	XLOC_038973	ANKRD37	130.136	1.30136	chr4:185151722-185472263	TKS4_WT	TKS4_WT_T	1320.42	3038.76	1.20249	1320.42	3038.76	1.20249	0.11915	0.4294	0.367138	0.999503	protein_coding	chr4	185396021-185400628	+	ENSG00000186352.9
XLOC_030248	XLOC_030248	ANKRD39	21.372	0.21372	chr2:96847989-96858016	TKS4_WT	TKS4_WT_T	8318.72	10096.6	0.27944	8318.72	10096.6	0.279436	0.255156	0.70545	0.151534	0.999503	protein_coding	chr2	96836611-96858016	-	ENSG00000213337.9
XLOC_022481	XLOC_022481	ANKRD40	20.3229	0.203229	chr17:50693194-50707914	TKS4_WT	TKS4_WT_T	138637	166812	0.266912	138637	166812	0.266911	0.282737	0.69555	0.157672	0.999503	protein_coding	chr17	50693198-50707914	-	ENSG00000154945.7
XLOC_022482	XLOC_022482	ANKRD40CL	28351.2	283.512	chr17:50761007-50767577	TKS4_WT	TKS4_WT_T	0	28.4512		0.1	28.4512	8.15235	0	1	0	1	protein_coding	chr17	50761029-50767557	-	ENSG00000167117.10
XLOC_008110	XLOC_008110	ANKRD42,RPL32P24	-46.8267	-0.468267	chr11:83193711-83256099	TKS4_WT	TKS4_WT_T	11288.1	6002.26	-0.911227	11288.1	6002.26	-0.911225	-0.785402	0.2881	0.540457	0.999503	protein_coding,processed_pseudogene
XLOC_030950	XLOC_030950	ANKRD44	-18.3521	-0.183521	chr2:196962616-197310787	TKS4_WT	TKS4_WT_T	7023.98	5734.93	-0.292512	7023.98	5734.93	-0.292513	-0.235163	0.74515	0.127756	0.999503	protein_coding	chr2	196967017-197311173	-	ENSG00000065413.20
XLOC_004246	XLOC_004246	ANKRD45	366.233	3.66233	chr1:173500459-173705430	TKS4_WT	TKS4_WT_T	283.785	1323.1	2.22105	283.785	1323.1	2.22105	1.25648	0.0068	2.16749	0.732905	protein_coding	chr1	173608336-173669851	-	ENSG00000183831.7
XLOC_052526	XLOC_052526	ANKRD46	7.45411	0.0745411	chr8:100509751-100559759	TKS4_WT	TKS4_WT_T	18817.8	20220.5	0.103719	18817.8	20220.5	0.103721	0.0997699	0.89235	0.0494648	0.999503	protein_coding	chr8	100509752-100559784	-	ENSG00000186106.11
XLOC_008184	XLOC_008184	ANKRD49	11.7373	0.117373	chr11:94415569-94532123	TKS4_WT	TKS4_WT_T	10593.6	11837	0.160118	10593.6	11837	0.160111	0.0814461	0.938	0.0277972	0.999503	protein_coding	chr11	94493979-94499578	+	ENSG00000168876.9
XLOC_039821	XLOC_039821	ANKRD50	-31.6125	-0.316125	chr4:124664047-124712732	TKS4_WT	TKS4_WT_T	66197.3	45270.7	-0.548196	66197.3	45270.7	-0.548195	-0.622548	0.3862	0.413188	0.999503	protein_coding	chr4	124664048-124712732	-	ENSG00000151458.12
XLOC_011948	XLOC_011948	ANKRD52	2.87456	0.0287456	chr12:56230035-56258391	TKS4_WT	TKS4_WT_T	102033	104966	0.0408897	102033	104966	0.0408863	0.0414611	0.9554	0.0198148	0.999503	protein_coding	chr12	56237807-56258384	-	ENSG00000139645.11
XLOC_028114	XLOC_028114	ANKRD53	-35.4483	-0.354483	chr2:70973244-70994873	TKS4_WT	TKS4_WT_T	473.837	305.87	-0.631473	473.837	305.87	-0.631472	-0.0518596	0.6982	0.15602	0.999503	protein_coding	chr2	70978380-70985499	+	ENSG00000144031.12
XLOC_034279	XLOC_034279	ANKRD54,MIR658	12.0172	0.120172	chr22:37830852-37889407	TKS4_WT	TKS4_WT_T	24013.9	26899.7	0.163723	24013.9	26899.7	0.16372	0.0430577	0.887	0.0520764	0.999503	protein_coding,miRNA
XLOC_043908	XLOC_043908	ANKRD6	-42.4361	-0.424361	chr6:89433151-89828021	TKS4_WT	TKS4_WT_T	14512.6	8354.02	-0.796768	14512.6	8354.02	-0.796764	-0.13511	0.35105	0.454631	0.999503	protein_coding	chr6	89433152-89633834	+	ENSG00000135299.17
XLOC_048063	XLOC_048063	ANKRD61	-36.8309	-0.368309	chr7:6009271-6059175	TKS4_WT	TKS4_WT_T	177.913	112.386	-0.662706	177.913	112.386	-0.66271	-0.0199215	0.7493	0.125344	0.999503	protein_coding	chr7	6031376-6036552	+	ENSG00000157999.6
XLOC_023323	XLOC_023323	ANKRD62	-80.386	-0.80386	chr18:12093795-12181684	TKS4_WT	TKS4_WT_T	841.404	165.033	-2.35005	841.404	165.033	-2.35004	-1.20326	0.0739	1.13136	0.999503	protein_coding	chr18	12093843-12129764	+	ENSG00000181626.12
XLOC_017359	XLOC_017359	ANKRD63	99.0682	0.990682	chr15:40278371-40283064	TKS4_WT	TKS4_WT_T	843.992	1680.12	0.993262	843.992	1680.12	0.993263	0.702672	0.3542	0.450751	0.999503	protein_coding	chr15	40278372-40283064	-	ENSG00000230778.2
XLOC_002526	XLOC_002526	ANKRD65	53965.2	539.652	chr1:1418419-1423287	TKS4_WT	TKS4_WT_T	0	54.0652		0.1	54.0652	9.07856		0.09795	1.009	0.999503	protein_coding	chr1	1418420-1421769	-	ENSG00000235098.9
XLOC_015767	XLOC_015767	ANKRD9	-0.0935239	-0.000935239	chr14:102362940-102509776	TKS4_WT	TKS4_WT_T	17856.4	17839.7	-0.0013473	17856.4	17839.7	-0.0013499	-0.000856134	0.9985	0.000651931	0.999508	protein_coding	chr14	102501767-102509799	-	ENSG00000156381.9
XLOC_043535	XLOC_043535	ANKS1A	-18.4473	-0.184473	chr6:34889254-35097992	TKS4_WT	TKS4_WT_T	43964.2	35854	-0.294193	43964.2	35854	-0.294195	-0.302234	0.66245	0.178847	0.999503	protein_coding	chr6	34889255-35091406	+	ENSG00000064999.15
XLOC_012250	XLOC_012250	ANKS1B	-21.6447	-0.216447	chr12:98645140-99984936	TKS4_WT	TKS4_WT_T	778.916	610.322	-0.351898	778.916	610.322	-0.351897	-0.05781	0.6858	0.163803	0.999503	protein_coding	chr12	98726457-99984936	-	ENSG00000185046.20
XLOC_019501	XLOC_019501	ANKS3	-0.49032	-0.0049032	chr16:4696509-4767219	TKS4_WT	TKS4_WT_T	7376.82	7340.65	-0.00709134	7376.82	7340.65	-0.00709122	-0.00402012	0.99425	0.0025044	0.999503	protein_coding	chr16	4696510-4734378	-	ENSG00000168096.15
XLOC_018687	XLOC_018687	ANKS4B	82.1215	0.821215	chr16:21227150-21253850	TKS4_WT	TKS4_WT_T	31.2442	56.9024	0.864901	31.2442	56.9024	0.864901	0	1	0	1	protein_coding	chr16	21233699-21253850	+	ENSG00000175311.7
XLOC_054987	XLOC_054987	ANKS6	-49.4218	-0.494218	chr9:98732008-98796555	TKS4_WT	TKS4_WT_T	52969.3	26790.9	-0.98341	52969.3	26790.9	-0.983413	-0.941561	0.21925	0.65906	0.999503	protein_coding	chr9	98731329-98796965	-	ENSG00000165138.18
XLOC_037230	XLOC_037230	ANKUB1	56802.4	568.024	chr3:149760647-149792554	TKS4_WT	TKS4_WT_T	0	56.9024		0.1	56.9024	9.15235	0	1	0	1	protein_coding	chr3	149761100-149968385	-	ENSG00000206199.11
XLOC_029219	XLOC_029219	ANKZF1	1.38524	0.0138524	chr2:219229805-219245444	TKS4_WT	TKS4_WT_T	27857.9	28243.8	0.0198508	27857.9	28243.8	0.0198477	0.0194518	0.97925	0.00910642	0.999503	protein_coding	chr2	219229783-219236679	+	ENSG00000163516.14
XLOC_048282	XLOC_048282	ANLN	-11.4377	-0.114377	chr7:36324151-36453791	TKS4_WT	TKS4_WT_T	289123	256054	-0.175234	289123	256054	-0.175235	-0.157392	0.8501	0.07053	0.999503	protein_coding	chr7	36389821-36453791	+	ENSG00000011426.11
XLOC_007959	XLOC_007959	ANO1	5.83801	0.0583801	chr11:69985906-70189530	TKS4_WT	TKS4_WT_T	55308.2	58537.1	0.0818581	55308.2	58537.1	0.0818579	0.0859925	0.91095	0.0405055	0.999503	protein_coding	chr11	69985907-70189530	+	ENSG00000131620.18
XLOC_036459	XLOC_036459	ANO10	-26.3784	-0.263784	chr3:43365847-43734371	TKS4_WT	TKS4_WT_T	15289	11256	-0.441792	15289	11256	-0.4418	-0.230807	0.75795	0.120359	0.999503	protein_coding	chr3	43354859-43691594	-	ENSG00000160746.13
XLOC_011402	XLOC_011402	ANO2	53.0759	0.530759	chr12:5560240-5948790	TKS4_WT	TKS4_WT_T	543.689	832.257	0.614246	543.689	832.257	0.614247	0.3558	0.36135	0.442072	0.999503	protein_coding	chr12	5531869-5946232	-	ENSG00000047617.17
XLOC_011016	XLOC_011016	ANO4	-8.53443	-0.0853443	chr12:100717456-101128641	TKS4_WT	TKS4_WT_T	1868.08	1708.65	-0.128704	1868.08	1708.65	-0.128699	-0.0884929	0.8618	0.0645935	0.999503	protein_coding	chr12	100717526-101128641	+	ENSG00000151572.18
XLOC_007408	XLOC_007408	ANO5	-25.0298	-0.250298	chr11:22192484-22283367	TKS4_WT	TKS4_WT_T	4229.91	3171.17	-0.415613	4229.91	3171.17	-0.415612	-0.363704	0.57855	0.237659	0.999503	protein_coding	chr11	21782659-22283567	+	ENSG00000171714.13
XLOC_010485	XLOC_010485	ANO6	-9.45669	-0.0945669	chr12:45216032-45568844	TKS4_WT	TKS4_WT_T	140821	127504	-0.143322	140821	127504	-0.14332	-0.151476	0.8446	0.0733489	0.999503	protein_coding	chr12	45215987-45482280	+	ENSG00000177119.17
XLOC_029411	XLOC_029411	ANO7	-0.0709184	-0.000709184	chr2:241188550-241354027	TKS4_WT	TKS4_WT_T	593.64	593.219	-0.0010217	593.64	593.219	-0.0010235	-3.96527e-05	0.96035	0.0175705	0.999503	protein_coding	chr2	241188509-241225976	+	ENSG00000146205.15
XLOC_025841	XLOC_025841	ANO8	-40.2439	-0.402439	chr19:17309562-17334855	TKS4_WT	TKS4_WT_T	16940.7	10123.1	-0.742843	16940.7	10123.1	-0.742842	-0.273016	0.71995	0.142698	0.999503	protein_coding	chr19	17323223-17334855	-	ENSG00000074855.11
XLOC_008560	XLOC_008560	ANO9	-9.92075	-0.0992075	chr11:417933-442011	TKS4_WT	TKS4_WT_T	18864.5	16993	-0.150735	18864.5	16993	-0.150733	-0.132651	0.8585	0.0662597	0.999503	protein_coding	chr11	417933-442011	-	ENSG00000185101.13
XLOC_017658	XLOC_017658	ANP32A	-2.45137	-0.0245137	chr15:68778534-68820895	TKS4_WT	TKS4_WT_T	96423.6	94059.9	-0.0358061	96423.6	94059.9	-0.0358065	-0.0391865	0.95125	0.0217053	0.999503	protein_coding	chr15	68778535-68820897	-	ENSG00000140350.15
XLOC_053870	XLOC_053870	ANP32B	-2.95615	-0.0295615	chr9:97983340-98015943	TKS4_WT	TKS4_WT_T	55636.6	53991.9	-0.0432891	55636.6	53991.9	-0.0432913	-0.0383412	0.9595	0.017955	0.999503	protein_coding	chr9	97983341-98015943	+	ENSG00000136938.9
XLOC_003857	XLOC_003857	ANP32E	4.67925	0.0467925	chr1:150218416-150236133	TKS4_WT	TKS4_WT_T	102431	107224	0.0659783	102431	107224	0.0659755	0.0742116	0.9231	0.0347512	0.999503	protein_coding	chr1	150218417-150236156	-	ENSG00000143401.15
XLOC_017900	XLOC_017900	ANPEP	56802.4	568.024	chr15:89784894-89814852	TKS4_WT	TKS4_WT_T	0	56.9024		0.1	56.9024	9.15235	0	1	0	1	protein_coding	chr15	89784895-89815401	-	ENSG00000166825.15
XLOC_018429	XLOC_018429	ANTKMT	27.5153	0.275153	chr16:720580-726880	TKS4_WT	TKS4_WT_T	17183.9	21912.1	0.350667	17183.9	21912.1	0.35067	0.289349	0.6859	0.163739	0.999503	protein_coding	chr16	720581-722590	+	ENSG00000103254.10
XLOC_028095	XLOC_028095	ANTXR1	8.82908	0.0882908	chr2:69013143-69249327	TKS4_WT	TKS4_WT_T	61747.1	67198.8	0.122063	61747.1	67198.8	0.122064	0.131789	0.85025	0.0704534	0.999503	protein_coding	chr2	69013176-69249327	+	ENSG00000169604.21
XLOC_039548	XLOC_039548	ANTXR2	-10.7393	-0.107393	chr4:79901145-80073472	TKS4_WT	TKS4_WT_T	13486.9	12038.5	-0.16391	13486.9	12038.5	-0.163903	-0.152771	0.8467	0.0722704	0.999503	protein_coding	chr4	79901146-80125454	-	ENSG00000163297.18
XLOC_053662	XLOC_053662	ANXA1	17.8336	0.178336	chr9:73151864-73170393	TKS4_WT	TKS4_WT_T	350945	413531	0.236749	350945	413531	0.236751	0.183398	0.79105	0.101796	0.999503	protein_coding	chr9	73151865-73170393	+	ENSG00000135046.14
XLOC_038878	XLOC_038878	ANXA10	76.3577	0.763577	chr4:168092524-168199047	TKS4_WT	TKS4_WT_T	1202.8	2121.23	0.818501	1202.8	2121.23	0.818504	0.428499	0.56815	0.245537	0.999503	protein_coding	chr4	168092537-168187736	+	ENSG00000109511.12
XLOC_006657	XLOC_006657	ANXA11	-30.6808	-0.306808	chr10:80150888-80205808	TKS4_WT	TKS4_WT_T	86164.1	59728.3	-0.528673	86164.1	59728.3	-0.528672	-0.46541	0.59845	0.222972	0.999503	protein_coding	chr10	80150889-80205572	-	ENSG00000122359.18
XLOC_017563	XLOC_017563	ANXA2	0.982735	0.00982735	chr15:60347150-60398025	TKS4_WT	TKS4_WT_T	1519230	1534160	0.0141127	1519230	1534160	0.0141087	0.00894378	0.98865	0.00495743	0.999503	protein_coding	chr15	60347134-60402883	-	ENSG00000182718.18
XLOC_041823	XLOC_041823	ANXA2R	86.8552	0.868552	chr5:43014728-43093558	TKS4_WT	TKS4_WT_T	459.11	857.871	0.901919	459.11	857.871	0.901921	0.273073	0.7038	0.152551	0.999503	protein_coding	chr5	43039233-43043170	-	ENSG00000177721.5
XLOC_038367	XLOC_038367	ANXA3	-32.1212	-0.321212	chr4:78551760-78610447	TKS4_WT	TKS4_WT_T	370288	251347	-0.558969	370288	251347	-0.558967	-0.443554	0.5123	0.290476	0.999503	protein_coding	chr4	78551747-78610451	+	ENSG00000138772.13
XLOC_028100	XLOC_028100	ANXA4	-14.0993	-0.140993	chr2:69643807-69827112	TKS4_WT	TKS4_WT_T	24779.2	21285.5	-0.21926	24779.2	21285.5	-0.219259	-0.218768	0.76045	0.118929	0.999503	protein_coding	chr2	69644425-69827112	+	ENSG00000196975.16
XLOC_039800	XLOC_039800	ANXA5	21.4972	0.214972	chr4:121667945-121696994	TKS4_WT	TKS4_WT_T	152769	185610	0.280917	152769	185610	0.280923	0.29246	0.67985	0.167587	0.999503	protein_coding	chr4	121667946-121696995	-	ENSG00000164111.15
XLOC_042551	XLOC_042551	ANXA6	-7.05181	-0.0705181	chr5:151100705-151157779	TKS4_WT	TKS4_WT_T	81208.9	75482.2	-0.1055	81208.9	75482.2	-0.105501	-0.112625	0.87355	0.0587122	0.999503	protein_coding	chr5	151100706-151157785	-	ENSG00000197043.14
XLOC_006591	XLOC_006591	ANXA7	1.20013	0.0120013	chr10:73375100-73414058	TKS4_WT	TKS4_WT_T	123737	125222	0.0172165	123737	125222	0.0172111	0.0173322	0.9792	0.0091286	0.999503	protein_coding	chr10	73375101-73414076	-	ENSG00000138279.16
XLOC_006415	XLOC_006415	ANXA8	-99.9389	-0.999389	chr10:47467992-47991879	TKS4_WT	TKS4_WT_T	163.584	0		163.584	0.1	-10.6758	0	1	0	1	protein_coding	chr10	47460162-47484158	-	ENSG00000265190.7
XLOC_001454	XLOC_001454	ANXA9	3.42091	0.0342091	chr1:150982285-150996063	TKS4_WT	TKS4_WT_T	1019.32	1054.19	0.0485349	1019.32	1054.19	0.0485279	0.0335191	0.9622	0.0167346	0.999503	protein_coding	chr1	150982249-150995634	+	ENSG00000143412.10
XLOC_049609	XLOC_049609	AOAH	-73.4727	-0.734727	chr7:36509312-36724549	TKS4_WT	TKS4_WT_T	209.157	55.4838	-1.91445	209.157	55.4838	-1.91445	-0.697087	0.23835	0.622785	0.999503	protein_coding	chr7	36512941-36724549	-	ENSG00000136250.12
XLOC_049267	XLOC_049267	AOC1	104.886	1.04886	chr7:150818963-150877309	TKS4_WT	TKS4_WT_T	124.977	256.061	1.03483	124.977	256.061	1.03482	0	1	0	1	protein_coding	chr7	150824627-150861504	+	ENSG00000002726.21
XLOC_021132	XLOC_021132	AOC2	-43.113	-0.43113	chr17:42844579-42850707	TKS4_WT	TKS4_WT_T	5899.38	3355.98	-0.813829	5899.38	3355.98	-0.813829	-0.629619	0.3403	0.468138	0.999503	protein_coding	chr17	42844580-42850707	+	ENSG00000131480.9
XLOC_021133	XLOC_021133	AOC3	-66.9562	-0.669562	chr17:42851181-42858131	TKS4_WT	TKS4_WT_T	3930.6	1298.82	-1.59754	3930.6	1298.82	-1.59755	-1.0243	0.13865	0.85808	0.999503	protein_coding	chr17	42851184-42858130	+	ENSG00000131471.7
XLOC_053833	XLOC_053833	AOPEP,MIR23B,MIR24-1,MIR27B	6.55177	0.0655177	chr9:94726668-95317730	TKS4_WT	TKS4_WT_T	19159.7	20415	0.0915602	19159.7	20415	0.0915546	0.0639898	0.88465	0.0532285	0.999503	protein_coding,miRNA,miRNA,miRNA
XLOC_029034	XLOC_029034	AOX1	212.732	2.12732	chr2:200585951-200677064	TKS4_WT	TKS4_WT_T	300.701	940.387	1.64493	300.701	940.387	1.64492	0.900431	0.1766	0.753009	0.999503	protein_coding	chr2	200586014-200677064	+	ENSG00000138356.14
XLOC_038563	XLOC_038563	AP1AR	3.7086	0.037086	chr4:112231786-112273110	TKS4_WT	TKS4_WT_T	49271.9	51099.2	0.0525336	49271.9	51099.2	0.0525356	0.0582142	0.9294	0.0317973	0.999503	protein_coding	chr4	112231740-112273110	+	ENSG00000138660.12
XLOC_034160	XLOC_034160	AP1B1	-14.4763	-0.144763	chr22:29327679-29388570	TKS4_WT	TKS4_WT_T	81671.4	69848.4	-0.225603	81671.4	69848.4	-0.225604	-0.232575	0.74815	0.126011	0.999503	protein_coding	chr22	29327680-29388583	-	ENSG00000100280.17
XLOC_020118	XLOC_020118	AP1G1	-4.10876	-0.0410876	chr16:71728999-71808834	TKS4_WT	TKS4_WT_T	162604	155923	-0.0605306	162604	155923	-0.060529	-0.0607994	0.929	0.0319843	0.999503	protein_coding	chr16	71729000-71809201	-	ENSG00000166747.13
XLOC_015154	XLOC_015154	AP1G2,JPH4	-17.0596	-0.170596	chr14:23511759-23578790	TKS4_WT	TKS4_WT_T	37680.9	31252.7	-0.269851	37680.9	31252.7	-0.269853	-0.259376	0.6633	0.17829	0.999503	protein_coding,protein_coding
XLOC_024591	XLOC_024591	AP1M1	-28.1616	-0.281616	chr19:16197910-16245906	TKS4_WT	TKS4_WT_T	39616.3	28459.7	-0.477172	39616.3	28459.7	-0.477174	-0.476024	0.50175	0.299513	0.999503	protein_coding	chr19	16197854-16245906	+	ENSG00000072958.9
XLOC_025703	XLOC_025703	AP1M2	-22.1511	-0.221511	chr19:10572670-10587315	TKS4_WT	TKS4_WT_T	40378.1	31433.9	-0.361253	40378.1	31433.9	-0.361252	-0.397772	0.5736	0.241391	0.999503	protein_coding	chr19	10572671-10587315	-	ENSG00000129354.12
XLOC_048824	XLOC_048824	AP1S1	39.634	0.39634	chr7:101154475-101161276	TKS4_WT	TKS4_WT_T	72985.1	101912	0.481645	72985.1	101912	0.48165	0.509818	0.46185	0.335499	0.999503	protein_coding	chr7	101154456-101161596	+	ENSG00000106367.15
XLOC_056749	XLOC_056749	AP1S2	-13.7863	-0.137863	chrX:15790471-15854966	TKS4_WT	TKS4_WT_T	24487.3	21111.4	-0.21401	24487.3	21111.4	-0.214011	-0.209522	0.77385	0.111343	0.999503	protein_coding	chrX	15825806-15854931	-	ENSG00000182287.15
XLOC_031165	XLOC_031165	AP1S3	-47.201	-0.47201	chr2:223755325-223837582	TKS4_WT	TKS4_WT_T	141531	74727	-0.921412	141531	74727	-0.921417	-0.960387	0.17705	0.751904	0.999503	protein_coding	chr2	223751686-223838027	-	ENSG00000152056.17
XLOC_025176	XLOC_025176	AP2A1	-28.3158	-0.283158	chr19:49767000-49817376	TKS4_WT	TKS4_WT_T	74800	53619.8	-0.480273	74800	53619.8	-0.480272	-0.481636	0.47855	0.320073	0.999503	protein_coding	chr19	49767001-49807114	+	ENSG00000196961.13
XLOC_007155	XLOC_007155	AP2A2	-24.7922	-0.247922	chr11:925849-1012245	TKS4_WT	TKS4_WT_T	63153.3	47496.2	-0.411047	63153.3	47496.2	-0.411046	-0.435592	0.53215	0.273966	0.999503	protein_coding	chr11	924881-1012245	+	ENSG00000183020.15
XLOC_020983	XLOC_020983	AP2B1	16.7273	0.167273	chr17:35587264-35726413	TKS4_WT	TKS4_WT_T	236273	275795	0.223144	236273	275795	0.223142	0.223434	0.76215	0.11796	0.999503	protein_coding	chr17	35578046-35726413	+	ENSG00000006125.18
XLOC_036036	XLOC_036036	AP2M1	9.40526	0.0940526	chr3:184174845-184184091	TKS4_WT	TKS4_WT_T	242577	265392	0.129682	242577	265392	0.129682	0.12841	0.84735	0.0719372	0.999503	protein_coding	chr3	184174689-184184214	+	ENSG00000161203.14
XLOC_026288	XLOC_026288	AP2S1	26.6486	0.266486	chr19:46838166-46850846	TKS4_WT	TKS4_WT_T	166928	211412	0.340827	166928	211412	0.340831	0.322693	0.6273	0.202525	0.999503	protein_coding	chr19	46838136-46850846	-	ENSG00000042753.12
XLOC_042049	XLOC_042049	AP3B1	-26.3039	-0.263039	chr5:78000521-78294755	TKS4_WT	TKS4_WT_T	87476	64466.4	-0.44034	87476	64466.4	-0.44034	-0.495693	0.50175	0.299513	0.999503	protein_coding	chr5	78000522-78294762	-	ENSG00000132842.15
XLOC_017826	XLOC_017826	AP3B2	-24.8539	-0.248539	chr15:82543200-82709875	TKS4_WT	TKS4_WT_T	151.445	113.805	-0.412231	151.445	113.805	-0.41223	0	1	0	1	protein_coding	chr15	82659281-82710112	-	ENSG00000103723.17
XLOC_025522	XLOC_025522	AP3D1	-43.2596	-0.432596	chr19:2100987-2151566	TKS4_WT	TKS4_WT_T	140853	79920.5	-0.817555	140853	79920.5	-0.817553	-0.815513	0.2925	0.533874	0.999503	protein_coding	chr19	2100988-2164468	-	ENSG00000065000.19
XLOC_006606	XLOC_006606	AP3M1	4.95127	0.0495127	chr10:73998113-74151067	TKS4_WT	TKS4_WT_T	68435	71823.4	0.0697197	68435	71823.4	0.0697196	0.0363622	0.96395	0.0159455	0.999503	protein_coding	chr10	74120255-74150842	-	ENSG00000185009.13
XLOC_051089	XLOC_051089	AP3M2	1.20271	0.0120271	chr8:42153034-42171183	TKS4_WT	TKS4_WT_T	38155.4	38614.3	0.0172488	38155.4	38614.3	0.017248	0.0175733	0.98305	0.00742439	0.999503	protein_coding	chr8	42152946-42171673	+	ENSG00000070718.12
XLOC_041008	XLOC_041008	AP3S1	3.82703	0.0382703	chr5:115841605-115914081	TKS4_WT	TKS4_WT_T	389649	404561	0.0541828	389649	404561	0.0541821	0.0522312	0.93525	0.0290723	0.999503	protein_coding	chr5	115841592-115914081	+	ENSG00000177879.17
XLOC_017901	XLOC_017901	AP3S2,ARPIN,ARPIN-AP3S2	52.8098	0.528098	chr15:89830598-89912952	TKS4_WT	TKS4_WT_T	52322.3	79953.6	0.611738	52322.3	79953.6	0.611737	0.677224	0.33275	0.477882	0.999503	protein_coding,protein_coding,protein_coding
XLOC_003623	XLOC_003623	AP4B1	-8.94396	-0.0894396	chr1:113812611-113914086	TKS4_WT	TKS4_WT_T	17235.1	15693.6	-0.135174	17235.1	15693.6	-0.135173	-0.0958629	0.88805	0.0515626	0.999503	protein_coding	chr1	113894194-113905201	-	ENSG00000134262.13
XLOC_016650	XLOC_016650	AP4E1	-0.942504	-0.00942504	chr15:50908568-51005900	TKS4_WT	TKS4_WT_T	35098	34767.2	-0.0136612	35098	34767.2	-0.0136619	-0.013928	0.9851	0.00651968	0.999503	protein_coding	chr15	50908672-51005895	+	ENSG00000081014.11
XLOC_048788	XLOC_048788	AP4M1	11.1942	0.111942	chr7:100101412-100128495	TKS4_WT	TKS4_WT_T	14865.7	16529.8	0.153087	14865.7	16529.8	0.153082	0.100263	0.8999	0.0458057	0.999503	protein_coding	chr7	100101549-100110345	+	ENSG00000221838.10
XLOC_014298	XLOC_014298	AP4S1	48.6084	0.486084	chr14:30893803-31096450	TKS4_WT	TKS4_WT_T	7515.93	11169.3	0.571522	7515.93	11169.3	0.571515	0.219514	0.75155	0.124042	0.999503	protein_coding	chr14	31025106-31130996	+	ENSG00000100478.16
XLOC_009319	XLOC_009319	AP5B1	64.704	0.64704	chr11:65773897-65780976	TKS4_WT	TKS4_WT_T	38422.2	63282.9	0.719876	38422.2	63282.9	0.719876	0.684017	0.33495	0.47502	0.999503	protein_coding	chr11	65773898-65780976	-	ENSG00000254470.3
XLOC_014480	XLOC_014480	AP5M1	-16.648	-0.16648	chr14:57268914-57298742	TKS4_WT	TKS4_WT_T	50251.6	41885.7	-0.262713	50251.6	41885.7	-0.262712	-0.268134	0.69365	0.15886	0.999503	protein_coding	chr14	57268924-57298742	+	ENSG00000053770.12
XLOC_031388	XLOC_031388	AP5S1	-2.81774	-0.0281774	chr20:3820546-3828838	TKS4_WT	TKS4_WT_T	11810.9	11478.1	-0.0412323	11810.9	11478.1	-0.0412351	-0.0388292	0.9562	0.0194513	0.999503	protein_coding	chr20	3820524-3828838	+	ENSG00000125843.11
XLOC_048047	XLOC_048047	AP5Z1	-13.2538	-0.132538	chr7:4775622-4794397	TKS4_WT	TKS4_WT_T	14338.5	12438.1	-0.205124	14338.5	12438.1	-0.205128	-0.203234	0.77845	0.108769	0.999503	protein_coding	chr7	4775615-4794397	+	ENSG00000242802.9
XLOC_011004	XLOC_011004	APAF1	-20.3733	-0.203733	chr12:98645140-99984936	TKS4_WT	TKS4_WT_T	34202.1	27234	-0.328673	34202.1	27234	-0.328676	-0.322595	0.64945	0.187454	0.999503	protein_coding	chr12	98645290-98735433	+	ENSG00000120868.14
XLOC_054745	XLOC_054745	APBA1	-4.84731	-0.0484731	chr9:69427531-69673012	TKS4_WT	TKS4_WT_T	177.913	169.289	-0.0716861	177.913	169.289	-0.0716837	-0.0270662	0.91575	0.0382231	0.999503	protein_coding	chr9	69427532-69672371	-	ENSG00000107282.8
XLOC_016414	XLOC_016414	APBA2	-19.1982	-0.191982	chr15:28885478-29679163	TKS4_WT	TKS4_WT_T	276.422	223.354	-0.307539	276.422	223.354	-0.30754	-0.0432287	0.6548	0.183891	0.999503	protein_coding	chr15	28884483-29118315	+	ENSG00000034053.15
XLOC_025555	XLOC_025555	APBA3	23.5801	0.235801	chr19:3708383-3761696	TKS4_WT	TKS4_WT_T	13368.5	16520.8	0.305446	13368.5	16520.8	0.305446	0.16893	0.7963	0.0989233	0.999503	protein_coding	chr19	3750772-3761692	-	ENSG00000011132.12
XLOC_008720	XLOC_008720	APBB1	-7.60148	-0.0760148	chr11:6395123-6419453	TKS4_WT	TKS4_WT_T	12127.9	11206	-0.114063	12127.9	11206	-0.114058	-0.0998445	0.88325	0.0539164	0.999503	protein_coding	chr11	6395125-6419414	-	ENSG00000166313.20
XLOC_039295	XLOC_039295	APBB2	-3.28027	-0.0328027	chr4:40749873-41216714	TKS4_WT	TKS4_WT_T	150079	145156	-0.0481212	150079	145156	-0.0481179	-0.048864	0.9489	0.0227796	0.999503	protein_coding	chr4	40810027-41216714	-	ENSG00000163697.17
XLOC_042466	XLOC_042466	APBB3	128.377	1.28377	chr5:140558267-140564604	TKS4_WT	TKS4_WT_T	4010.4	9158.84	1.19142	4010.4	9158.84	1.19142	0.950013	0.16625	0.779238	0.999503	protein_coding	chr5	140558268-140564781	-	ENSG00000113108.20
XLOC_040989	XLOC_040989	APC	15.0594	0.150594	chr5:112707497-112846239	TKS4_WT	TKS4_WT_T	89394.7	102857	0.202379	89394.7	102857	0.202379	0.216592	0.76445	0.116651	0.999503	protein_coding	chr5	112707498-112846239	+	ENSG00000134982.17
XLOC_024285	XLOC_024285	APC2	-36.6731	-0.366731	chr19:1446267-1479215	TKS4_WT	TKS4_WT_T	6833.72	4327.58	-0.659112	6833.72	4327.58	-0.659111	-0.228683	0.73955	0.131032	0.999503	protein_coding	chr19	1446302-1473244	+	ENSG00000115266.12
XLOC_023308	XLOC_023308	APCDD1	-99.8111	-0.998111	chr18:10454634-10489949	TKS4_WT	TKS4_WT_T	52.9361	0		52.9361	0.1	-9.04811	0	1	0	1	protein_coding	chr18	10454635-10489949	+	ENSG00000154856.13
XLOC_032566	XLOC_032566	APCDD1L	-99.84	-0.9984	chr20:58459100-58619892	TKS4_WT	TKS4_WT_T	62.4884	0		62.4884	0.1	-9.28744	0	1	0	1	protein_coding	chr20	58459101-58515399	-	ENSG00000198768.11
XLOC_035125	XLOC_035125	APEH	-4.12918	-0.0412918	chr3:49673101-49723951	TKS4_WT	TKS4_WT_T	148843	142697	-0.0608311	148843	142697	-0.0608364	-0.0482985	0.94435	0.024867	0.999503	protein_coding	chr3	49674014-49683971	+	ENSG00000164062.13
XLOC_014174	XLOC_014174	APEX1	14.7954	0.147954	chr14:20455225-20461612	TKS4_WT	TKS4_WT_T	108784	124879	0.199074	108784	124879	0.199065	0.194834	0.794	0.100179	0.999503	protein_coding	chr14	20455191-20457772	+	ENSG00000100823.12
XLOC_055973	XLOC_055973	APEX2	40.6287	0.406287	chrX:55000362-55078909	TKS4_WT	TKS4_WT_T	30078	42298.3	0.491889	30078	42298.3	0.491891	0.529653	0.45465	0.342323	0.999503	protein_coding	chrX	55000363-55009057	+	ENSG00000169188.5
XLOC_003858	XLOC_003858	APH1A	18.7139	0.187139	chr1:150257257-150282179	TKS4_WT	TKS4_WT_T	72253.9	85775.4	0.247488	72253.9	85775.4	0.247488	0.263052	0.7244	0.140022	0.999503	protein_coding	chr1	150265399-150269580	-	ENSG00000117362.13
XLOC_016744	XLOC_016744	APH1B	-12.3675	-0.123675	chr15:63277549-63309126	TKS4_WT	TKS4_WT_T	6097.59	5343.47	-0.190464	6097.59	5343.47	-0.190462	-0.180396	0.8088	0.0921589	0.999503	protein_coding	chr15	63276018-63309126	+	ENSG00000138613.14
XLOC_007512	XLOC_007512	API5	-5.90386	-0.0590386	chr11:43311969-43344530	TKS4_WT	TKS4_WT_T	212285	199752	-0.0877948	212285	199752	-0.0877925	-0.0824887	0.9051	0.0433034	0.999503	protein_coding	chr11	43311963-43344529	+	ENSG00000166181.13
XLOC_008946	XLOC_008946	APIP	-29.9045	-0.299045	chr11:34882294-34996128	TKS4_WT	TKS4_WT_T	19338.2	13555.2	-0.512603	19338.2	13555.2	-0.512607	-0.290313	0.63175	0.199455	0.999503	protein_coding	chr11	34853094-34916379	-	ENSG00000149089.13
XLOC_028088	XLOC_028088	APLF	-37.4021	-0.374021	chr2:68467584-68580162	TKS4_WT	TKS4_WT_T	1368.18	856.452	-0.675811	1368.18	856.452	-0.675814	-0.463058	0.5293	0.276298	0.999503	protein_coding	chr2	68467572-68655862	+	ENSG00000169621.10
XLOC_057468	XLOC_057468	APLN	11.3159	0.113159	chrX:129645258-129654956	TKS4_WT	TKS4_WT_T	327.169	364.191	0.15466	327.169	364.191	0.154659	0.0746539	0.919	0.0366845	0.999503	protein_coding	chrX	129645259-129654956	-	ENSG00000171388.12
XLOC_009113	XLOC_009113	APLNR	56802.4	568.024	chr11:57233590-57237430	TKS4_WT	TKS4_WT_T	0	56.9024		0.1	56.9024	9.15235	0	1	0	1	protein_coding	chr11	57233577-57237250	-	ENSG00000134817.12
XLOC_024866	XLOC_024866	APLP1	-26.6611	-0.266611	chr19:35825371-35879795	TKS4_WT	TKS4_WT_T	15919.8	11675.4	-0.447352	15919.8	11675.4	-0.44735	-0.393852	0.58015	0.23646	0.999503	protein_coding	chr19	35867899-35879792	+	ENSG00000105290.13
XLOC_008513	XLOC_008513	APLP2	7.12088	0.0712088	chr11:130069893-130144811	TKS4_WT	TKS4_WT_T	179739	192538	0.0992439	179739	192538	0.0992397	0.0904808	0.9158	0.0381994	0.999503	protein_coding	chr11	130068147-130144811	+	ENSG00000084234.18
XLOC_032231	XLOC_032231	APMAP	54.337	0.54337	chr20:24962924-24992930	TKS4_WT	TKS4_WT_T	61940.7	95597.4	0.626082	61940.7	95597.4	0.626084	0.633848	0.3671	0.435216	0.999503	protein_coding	chr20	24962925-24992751	-	ENSG00000101474.12
XLOC_009767	XLOC_009767	APOA1	85253.6	852.536	chr11:116835750-117098453	TKS4_WT	TKS4_WT_T	0	85.3536		0.1	85.3536	9.73731	0	1	0	1	protein_coding	chr11	116835751-116837622	-	ENSG00000118137.10
XLOC_004116	XLOC_004116	APOA2	56802.4	568.024	chr1:161222291-161223628	TKS4_WT	TKS4_WT_T	0	56.9024		0.1	56.9024	9.15235	0	1	0	1	protein_coding	chr1	161222292-161223631	-	ENSG00000158874.11
XLOC_043605	XLOC_043605	APOBEC2	56802.4	568.024	chr6:41053201-41140835	TKS4_WT	TKS4_WT_T	0	56.9024		0.1	56.9024	9.15235	0	1	0	1	protein_coding	chr6	41053202-41064891	+	ENSG00000124701.6
XLOC_033777	XLOC_033777	APOBEC3A,APOBEC3B	29.5497	0.295497	chr22:38957521-38998220	TKS4_WT	TKS4_WT_T	7569.46	9806.21	0.373506	7569.46	9806.21	0.373505	0.320233	0.64625	0.189599	0.999503	protein_coding,protein_coding
XLOC_033778	XLOC_033778	APOBEC3C,APOBEC3D,APOBEC3F	51.9021	0.519021	chr22:39014235-39055972	TKS4_WT	TKS4_WT_T	38123.3	57910.1	0.603142	38123.3	57910.1	0.603142	0.577865	0.4163	0.380594	0.999503	protein_coding,protein_coding,protein_coding
XLOC_033780	XLOC_033780	APOBEC3G	56802.4	568.024	chr22:39077004-39087743	TKS4_WT	TKS4_WT_T	0	56.9024		0.1	56.9024	9.15235	0	1	0	1	protein_coding	chr22	39077067-39087743	+	ENSG00000239713.9
XLOC_033782	XLOC_033782	APOBEC3H	-11.0685	-0.110685	chr22:39097202-39104067	TKS4_WT	TKS4_WT_T	372.741	331.484	-0.169235	372.741	331.484	-0.169234	-0.0914561	0.8473	0.0719628	0.999503	protein_coding	chr22	39097224-39104067	+	ENSG00000100298.16
XLOC_018755	XLOC_018755	APOBR	-99.6799	-0.996799	chr16:28494642-28498964	TKS4_WT	TKS4_WT_T	31.2442	0		31.2442	0.1	-8.28744	0	1	0	1	protein_coding	chr16	28494643-28498964	+	ENSG00000184730.12
XLOC_025045	XLOC_025045	APOC1	82.7214	0.827214	chr19:44914324-44919346	TKS4_WT	TKS4_WT_T	507.669	927.62	0.869646	507.669	927.62	0.869646	0.519095	0.42195	0.374739	0.999503	protein_coding	chr19	44914247-44919349	+	ENSG00000130208.10
XLOC_037578	XLOC_037578	APOD	53.3535	0.533535	chr3:195568704-195583940	TKS4_WT	TKS4_WT_T	194.829	298.777	0.616865	194.829	298.777	0.616861	0.291963	0.6915	0.160208	0.999503	protein_coding	chr3	195568705-195584033	-	ENSG00000189058.9
XLOC_025044	XLOC_025044	APOE	22.9156	0.229156	chr19:44905795-44909393	TKS4_WT	TKS4_WT_T	560.207	688.582	0.29767	560.207	688.582	0.297668	0.193581	0.73075	0.136231	0.999503	protein_coding	chr19	44905791-44909393	+	ENSG00000130203.10
XLOC_033737	XLOC_033737	APOL1	-46.2537	-0.462537	chr22:36253070-36273198	TKS4_WT	TKS4_WT_T	52.9361	28.4512	-0.895763	52.9361	28.4512	-0.895762	0	1	0	1	protein_coding	chr22	36253071-36267530	+	ENSG00000100342.21
XLOC_034244	XLOC_034244	APOL2	-5.91969	-0.0591969	chr22:36226208-36239954	TKS4_WT	TKS4_WT_T	8498.42	7995.34	-0.088036	8498.42	7995.34	-0.0880353	-0.0773416	0.91605	0.0380808	0.999503	protein_coding	chr22	36226209-36239954	-	ENSG00000128335.14
XLOC_034242	XLOC_034242	APOL3	139.118	1.39118	chr22:36140322-36166177	TKS4_WT	TKS4_WT_T	57.7122	138	1.25772	57.7122	138	1.25772	0.198571	0.3233	0.490394	0.999503	protein_coding	chr22	36140329-36166177	-	ENSG00000128284.20
XLOC_034243	XLOC_034243	APOL4	26932.6	269.326	chr22:36189127-36204833	TKS4_WT	TKS4_WT_T	0	27.0326		0.1	27.0326	8.07856	0	1	0	1	protein_coding	chr22	36189124-36204840	-	ENSG00000100336.18
XLOC_033728	XLOC_033728	APOL6	116.16	1.1616	chr22:35648315-35668406	TKS4_WT	TKS4_WT_T	512.047	1106.84	1.1121	512.047	1106.84	1.1121	0.611776	0.3745	0.426548	0.999503	protein_coding	chr22	35648446-35668404	+	ENSG00000221963.6
XLOC_010302	XLOC_010302	APOLD1	4.66762	0.0466762	chr12:12725916-12791466	TKS4_WT	TKS4_WT_T	8160.91	8541.83	0.065815	8160.91	8541.83	0.0658152	0.0591068	0.9341	0.0296066	0.999503	protein_coding	chr12	12725917-12829975	+	ENSG00000178878.13
XLOC_043455	XLOC_043455	APOM	65.0108	0.650108	chr6:31639027-31660900	TKS4_WT	TKS4_WT_T	331.945	547.745	0.72256	331.945	547.745	0.72256	0.0433004	0.7661	0.115715	0.999503	protein_coding	chr6	31652416-31658210	+	ENSG00000204444.11
XLOC_056795	XLOC_056795	APOO	11.9976	0.119976	chrX:23833347-23939520	TKS4_WT	TKS4_WT_T	11526.5	12909.4	0.163459	11526.5	12909.4	0.163467	0.149261	0.84315	0.0740952	0.999503	protein_coding	chrX	23833353-23907938	-	ENSG00000184831.14
XLOC_056160	XLOC_056160	APOOL	-12.0845	-0.120845	chrX:85003851-85243779	TKS4_WT	TKS4_WT_T	36034.5	31679.9	-0.185812	36034.5	31679.9	-0.185811	-0.196237	0.7785	0.108741	0.999503	protein_coding	chrX	85003877-85093315	+	ENSG00000155008.16
XLOC_033150	XLOC_033150	APP	1.83173	0.0183173	chr21:25880549-26171128	TKS4_WT	TKS4_WT_T	199647	203304	0.026184	199647	203304	0.0261872	0.0222893	0.97845	0.00946136	0.999503	protein_coding	chr21	25880550-26171128	-	ENSG00000142192.21
XLOC_022559	XLOC_022559	APPBP2	-25.9128	-0.259128	chr17:60443148-60526242	TKS4_WT	TKS4_WT_T	88103.1	65273.1	-0.432705	88103.1	65273.1	-0.432704	-0.458847	0.51975	0.284206	0.999503	protein_coding	chr17	60443158-60526242	-	ENSG00000062725.10
XLOC_035206	XLOC_035206	APPL1,LOC105377102	-28.6862	-0.286862	chr3:57227728-57293048	TKS4_WT	TKS4_WT_T	73283.6	52261.3	-0.487747	73283.6	52261.3	-0.487747	-0.522371	0.4537	0.343231	0.999503	protein_coding,-
XLOC_012293	XLOC_012293	APPL2	-26.882	-0.26882	chr12:105173296-105236174	TKS4_WT	TKS4_WT_T	25755.2	18831.7	-0.451699	25755.2	18831.7	-0.451701	-0.437189	0.60395	0.218999	0.999503	protein_coding	chr12	105173297-105236203	-	ENSG00000136044.12
XLOC_020267	XLOC_020267	APRT	0.686295	0.00686295	chr16:88809338-88811928	TKS4_WT	TKS4_WT_T	117588	118395	0.00987183	117588	118395	0.00986732	0.0103764	0.98855	0.00500136	0.999503	protein_coding	chr16	88809339-88811937	-	ENSG00000198931.11
XLOC_054493	XLOC_054493	APTX	9.08277	0.0908277	chr9:32883871-33025120	TKS4_WT	TKS4_WT_T	48043.7	52407.4	0.125426	48043.7	52407.4	0.125423	0.134215	0.8117	0.0906045	0.999503	protein_coding	chr9	32886601-33025130	-	ENSG00000137074.20
XLOC_048245	XLOC_048245	AQP1	-33.7497	-0.337497	chr7:30911852-30925516	TKS4_WT	TKS4_WT_T	1548.28	1025.74	-0.594	1548.28	1025.74	-0.594001	-0.398868	0.60195	0.22044	0.999503	protein_coding	chr7	30911853-30925517	+	ENSG00000240583.14
XLOC_008075	XLOC_008075	AQP11	518.757	5.18757	chr11:77589952-77610356	TKS4_WT	TKS4_WT_T	57.7122	357.098	2.62937	57.7122	357.098	2.62937	0.957273	0.0458	1.33913	0.999503	protein_coding	chr11	77589391-77610356	+	ENSG00000178301.4
XLOC_054501	XLOC_054501	AQP3	2.22128	0.0222128	chr9:33441153-33447596	TKS4_WT	TKS4_WT_T	9724.11	9940.11	0.0316958	9724.11	9940.11	0.0316956	0.0291262	0.96535	0.0153152	0.999503	protein_coding	chr9	33441156-33447596	-	ENSG00000165272.16
XLOC_010551	XLOC_010551	AQP5	-50.7016	-0.507016	chr12:49950736-49978444	TKS4_WT	TKS4_WT_T	57.7122	28.4512	-1.02039	57.7122	28.4512	-1.02039	-0.320908	0.54855	0.260784	0.999503	protein_coding	chr12	49961872-49965682	+	ENSG00000161798.7
XLOC_010552	XLOC_010552	AQP6	28351.2	283.512	chr12:49950736-49978444	TKS4_WT	TKS4_WT_T	0	28.4512		0.1	28.4512	8.15235	0	1	0	1	protein_coding	chr12	49967194-49977139	+	ENSG00000086159.13
XLOC_054500	XLOC_054500	AQP7	-8.93926	-0.0893926	chr9:33383134-33410302	TKS4_WT	TKS4_WT_T	62.4884	56.9024	-0.135099	62.4884	56.9024	-0.135099	0	1	0	1	protein_coding	chr9	33383179-33402682	-	ENSG00000165269.13
XLOC_018738	XLOC_018738	AQP8	845.995	8.45995	chr16:25216916-25228932	TKS4_WT	TKS4_WT_T	26.468	250.386	3.24183	26.468	250.386	3.24183	2.74116	0.26295	0.580127	0.999503	protein_coding	chr16	25215731-25228932	+	ENSG00000103375.11
XLOC_017325	XLOC_017325	AQR	-0.575653	-0.00575653	chr15:34851781-34969742	TKS4_WT	TKS4_WT_T	92173.6	91643	-0.00832922	92173.6	91643	-0.00832891	-0.00834518	0.9899	0.00440868	0.999503	protein_coding	chr15	34851782-34969742	-	ENSG00000021776.11
XLOC_055843	XLOC_055843	ARAF	-2.58898	-0.0258898	chrX:47561204-47619857	TKS4_WT	TKS4_WT_T	25160.5	24509.1	-0.0378457	25160.5	24509.1	-0.0378431	-0.0254491	0.97185	0.0124008	0.999503	protein_coding	chrX	47561205-47571908	+	ENSG00000078061.14
XLOC_009434	XLOC_009434	ARAP1	-2.90113	-0.0290113	chr11:72685068-72752408	TKS4_WT	TKS4_WT_T	36437.5	35380.4	-0.0424751	36437.5	35380.4	-0.0424736	-0.0411544	0.9556	0.0197239	0.999503	protein_coding	chr11	72685069-72793599	-	ENSG00000186635.15
XLOC_039263	XLOC_039263	ARAP2	-32.5648	-0.325648	chr4:36005185-36274215	TKS4_WT	TKS4_WT_T	35784.6	24131.4	-0.568424	35784.6	24131.4	-0.568427	-0.578769	0.4038	0.393834	0.999503	protein_coding	chr4	35948221-36244514	-	ENSG00000047365.13
XLOC_042481	XLOC_042481	ARAP3	-44.0201	-0.440201	chr5:141653400-141682230	TKS4_WT	TKS4_WT_T	18769.6	10507.2	-0.837014	18769.6	10507.2	-0.83702	-0.683065	0.3185	0.496891	0.999503	protein_coding	chr5	141653401-141682230	-	ENSG00000120318.16
XLOC_052776	XLOC_052776	ARC	-21.0633	-0.210633	chr8:142611048-142614479	TKS4_WT	TKS4_WT_T	21861.2	17256.5	-0.341233	21861.2	17256.5	-0.341233	-0.335827	0.6075	0.216454	0.999503	protein_coding	chr8	142611049-142614479	-	ENSG00000198576.4
XLOC_008364	XLOC_008364	ARCN1	7.51034	0.0751034	chr11:118436491-118603033	TKS4_WT	TKS4_WT_T	179153	192608	0.104476	179153	192608	0.104475	0.0649504	0.92455	0.0340696	0.999503	protein_coding	chr11	118572390-118603033	+	ENSG00000095139.15
XLOC_038337	XLOC_038337	AREG	-1.88203	-0.0188203	chr4:74445135-74455005	TKS4_WT	TKS4_WT_T	158233	155255	-0.0274054	158233	155255	-0.0274108	-0.029221	0.96685	0.0146409	0.999503	protein_coding	chr4	74445136-74455005	+	ENSG00000109321.11
XLOC_015557	XLOC_015557	AREL1	-6.26344	-0.0626344	chr14:74661255-74738620	TKS4_WT	TKS4_WT_T	72016.3	67505.6	-0.0933172	72016.3	67505.6	-0.0933163	-0.0612287	0.92325	0.0346807	0.999503	protein_coding	chr14	74653437-74713117	-	ENSG00000119682.18
XLOC_002267	XLOC_002267	ARF1	14.533	0.14533	chr1:228082707-228099212	TKS4_WT	TKS4_WT_T	336476	385376	0.195762	336476	385376	0.195763	0.182797	0.78795	0.103501	0.999503	protein_coding	chr1	228082660-228099212	+	ENSG00000143761.16
XLOC_021191	XLOC_021191	ARF2P,CRHR1,LINC02210,LINC02210-CRHR1	-2.12273	-0.0212273	chr17:45620328-45835828	TKS4_WT	TKS4_WT_T	44565.2	43619.2	-0.0309549	44565.2	43619.2	-0.0309543	-0.0289348	0.97145	0.0125795	0.999503	-,protein_coding,transcribed_unitary_pseudogene,protein_coding
XLOC_011799	XLOC_011799	ARF3	19.4587	0.194587	chr12:48930251-48957526	TKS4_WT	TKS4_WT_T	148211	177051	0.256513	148211	177051	0.256512	0.237088	0.7298	0.136796	0.999503	protein_coding	chr12	48935723-48957487	-	ENSG00000134287.10
XLOC_036654	XLOC_036654	ARF4	-4.21791	-0.0421791	chr3:57556273-57693118	TKS4_WT	TKS4_WT_T	167263	160208	-0.0621734	167263	160208	-0.0621722	-0.0407823	0.95395	0.0204744	0.999503	protein_coding	chr3	57571363-57598220	-	ENSG00000168374.11
XLOC_048986	XLOC_048986	ARF5	17.3036	0.173036	chr7:127588410-127592205	TKS4_WT	TKS4_WT_T	115161	135088	0.230251	115161	135088	0.230247	0.241181	0.71565	0.145299	0.999503	protein_coding	chr7	127588386-127591700	+	ENSG00000004059.11
XLOC_014411	XLOC_014411	ARF6	30.2484	0.302484	chr14:49893081-49897054	TKS4_WT	TKS4_WT_T	107146	139556	0.381264	107146	139556	0.381266	0.394624	0.58095	0.235861	0.999503	protein_coding	chr14	49893079-49897054	+	ENSG00000165527.8
XLOC_031962	XLOC_031962	ARFGAP1	27.6777	0.276777	chr20:63272812-63289790	TKS4_WT	TKS4_WT_T	37371.6	47715.2	0.352504	37371.6	47715.2	0.352507	0.327145	0.61295	0.212575	0.999503	protein_coding	chr20	63272785-63289790	+	ENSG00000101199.13
XLOC_009009	XLOC_009009	ARFGAP2	79.047	0.79047	chr11:46936523-47176880	TKS4_WT	TKS4_WT_T	54574.5	97714	0.840338	54574.5	97714	0.840338	0.814436	0.2576	0.589054	0.999503	protein_coding	chr11	47164299-47177125	-	ENSG00000149182.15
XLOC_034378	XLOC_034378	ARFGAP3	12.5614	0.125614	chr22:42796501-42857294	TKS4_WT	TKS4_WT_T	24802.9	27918.5	0.170712	24802.9	27918.5	0.170713	0.177678	0.7987	0.0976163	0.999503	protein_coding	chr22	42796502-42858106	-	ENSG00000242247.11
XLOC_052286	XLOC_052286	ARFGEF1	-19.5417	-0.195417	chr8:67062416-67343824	TKS4_WT	TKS4_WT_T	63528.4	51113.9	-0.313687	63528.4	51113.9	-0.313686	-0.234613	0.7927	0.100891	0.999503	protein_coding	chr8	67173511-67343781	-	ENSG00000066777.9
XLOC_031805	XLOC_031805	ARFGEF2	-32.1652	-0.321652	chr20:48921710-49036693	TKS4_WT	TKS4_WT_T	95200.1	64578.8	-0.559903	95200.1	64578.8	-0.559902	-0.618483	0.35755	0.446663	0.999503	protein_coding	chr20	48921711-49036693	+	ENSG00000124198.10
XLOC_044202	XLOC_044202	ARFGEF3	1.81287	0.0181287	chr6:138161689-138344663	TKS4_WT	TKS4_WT_T	20862	21240.2	0.0259219	20862	21240.2	0.0259199	0.0268822	0.9687	0.0138107	0.999503	protein_coding	chr6	138161939-138344663	+	ENSG00000112379.9
XLOC_038790	XLOC_038790	ARFIP1	17.9825	0.179825	chr4:152779953-152912357	TKS4_WT	TKS4_WT_T	57778.3	68168.3	0.238573	57778.3	68168.3	0.238573	0.255139	0.7057	0.15138	0.999503	protein_coding	chr4	152779937-152918463	+	ENSG00000164144.16
XLOC_008723	XLOC_008723	ARFIP2	-16.5367	-0.165367	chr11:6474680-6481331	TKS4_WT	TKS4_WT_T	65177	54398.9	-0.260785	65177	54398.9	-0.260785	-0.274166	0.67825	0.16861	0.999503	protein_coding	chr11	6474683-6481479	-	ENSG00000132254.13
XLOC_032629	XLOC_032629	ARFRP1	80.5582	0.805582	chr20:63657809-63739107	TKS4_WT	TKS4_WT_T	15986.7	28865.3	0.852464	15986.7	28865.3	0.852464	0.35483	0.5123	0.290476	0.999503	protein_coding	chr20	63698642-63708025	-	ENSG00000101246.20
XLOC_014569	XLOC_014569	ARG2	125.506	1.25506	chr14:67619919-67674632	TKS4_WT	TKS4_WT_T	7481.7	16871.7	1.17317	7481.7	16871.7	1.17317	0.495642	0.5164	0.287014	0.999503	protein_coding	chr14	67619920-67651708	+	ENSG00000081181.8
XLOC_035586	XLOC_035586	ARGFX	190547	1905.47	chr3:121567948-121590622	TKS4_WT	TKS4_WT_T	0	190.647		0.1	190.647	10.8967		0.0146	1.83565	0.999503	protein_coding	chr3	121567949-121590622	+	ENSG00000186103.5
XLOC_014002	XLOC_014002	ARGLU1	9.82133	0.0982133	chr13:106541672-106568164	TKS4_WT	TKS4_WT_T	78786.7	86524.6	0.135158	78786.7	86524.6	0.135158	0.150841	0.8307	0.0805558	0.999503	protein_coding	chr13	106541673-106568137	-	ENSG00000134884.15
XLOC_009002	XLOC_009002	ARHGAP1	-13.9008	-0.139008	chr11:46677076-46700660	TKS4_WT	TKS4_WT_T	35179.2	30289	-0.215927	35179.2	30289	-0.215929	-0.209661	0.77185	0.112467	0.999503	protein_coding	chr11	46677080-46700619	-	ENSG00000175220.12
XLOC_038758	XLOC_038758	ARHGAP10	0.0897002	0.000897002	chr4:147732062-148072781	TKS4_WT	TKS4_WT_T	42586.3	42624.5	0.00129408	42586.3	42624.5	0.00129352	0.00136716	0.9985	0.000651931	0.999508	protein_coding	chr4	147732063-148072776	+	ENSG00000071205.12
XLOC_016464	XLOC_016464	ARHGAP11A,ARHGAP11A-SCG5,SCG5	-3.61886	-0.0361886	chr15:32615143-32697098	TKS4_WT	TKS4_WT_T	176271	169892	-0.0531752	176271	169892	-0.0531772	-0.0574002	0.93685	0.0283299	0.999503	protein_coding,protein_coding,protein_coding
XLOC_016439	XLOC_016439	ARHGAP11B,LOC100288637	-50.4977	-0.504977	chr15:30626127-30773009	TKS4_WT	TKS4_WT_T	35435.5	17541.4	-1.01443	35435.5	17541.4	-1.01443	-0.997781	0.21305	0.671518	0.999503	protein_coding,-
XLOC_006299	XLOC_006299	ARHGAP12	-31.1605	-0.311605	chr10:31805397-32056425	TKS4_WT	TKS4_WT_T	162462	111838	-0.53869	162462	111838	-0.538692	-0.300483	0.59125	0.228229	0.999503	protein_coding	chr10	31805398-31928876	-	ENSG00000165322.18
XLOC_028709	XLOC_028709	ARHGAP15	56802.4	568.024	chr2:143070972-143768352	TKS4_WT	TKS4_WT_T	0	56.9024		0.1	56.9024	9.15235	0	1	0	1	protein_coding	chr2	143091362-143768352	+	ENSG00000075884.14
XLOC_019695	XLOC_019695	ARHGAP17	-14.2271	-0.142271	chr16:24916828-25015601	TKS4_WT	TKS4_WT_T	29968.2	25704.6	-0.221404	29968.2	25704.6	-0.221406	-0.228477	0.76235	0.117846	0.999503	protein_coding	chr16	24919389-25015666	-	ENSG00000140750.17
XLOC_045587	XLOC_045587	ARHGAP18	-25.2217	-0.252217	chr6:129576131-129710225	TKS4_WT	TKS4_WT_T	167903	125555	-0.419314	167903	125555	-0.419309	-0.424275	0.5507	0.259085	0.999503	protein_coding	chr6	129576132-129710177	-	ENSG00000146376.11
XLOC_006792	XLOC_006792	ARHGAP19,ARHGAP19-SLIT1,SLIT1	12.7525	0.127525	chr10:96998037-97292673	TKS4_WT	TKS4_WT_T	84330.7	95085	0.17316	84330.7	95085	0.17316	0.183839	0.79765	0.0981876	0.999503	protein_coding,protein_coding,protein_coding
XLOC_006228	XLOC_006228	ARHGAP21	-23.9383	-0.239383	chr10:24583609-24725421	TKS4_WT	TKS4_WT_T	84127.9	63989.1	-0.394758	84127.9	63989.1	-0.394758	-0.429216	0.53015	0.275601	0.999503	protein_coding	chr10	24583609-24723887	-	ENSG00000107863.20
XLOC_006429	XLOC_006429	ARHGAP22	-31.8093	-0.318093	chr10:48306672-48656265	TKS4_WT	TKS4_WT_T	7349.95	5011.98	-0.552353	7349.95	5011.98	-0.552354	-0.170055	0.5563	0.254691	0.999503	protein_coding	chr10	48446036-48656265	-	ENSG00000128805.15
XLOC_021030	XLOC_021030	ARHGAP23	-10.6374	-0.106374	chr17:38419285-38512389	TKS4_WT	TKS4_WT_T	55722.5	49795.1	-0.162257	55722.5	49795.1	-0.162256	-0.153905	0.84385	0.0737347	0.999503	protein_coding	chr17	38419280-38512385	+	ENSG00000275832.5
XLOC_038413	XLOC_038413	ARHGAP24	-53.2123	-0.532123	chr4:85475149-86002666	TKS4_WT	TKS4_WT_T	1307.48	611.74	-1.0958	1307.48	611.74	-1.0958	-0.587963	0.43035	0.366178	0.999503	protein_coding	chr4	85475150-86002668	+	ENSG00000138639.18
XLOC_041216	XLOC_041216	ARHGAP26	-39.019	-0.39019	chr5:142770369-143229011	TKS4_WT	TKS4_WT_T	60743.5	37042	-0.713569	60743.5	37042	-0.713568	-0.750556	0.30935	0.50955	0.999503	protein_coding	chr5	142770377-143229011	+	ENSG00000145819.18
XLOC_022383	XLOC_022383	ARHGAP27	-20.8565	-0.208565	chr17:45393901-45432870	TKS4_WT	TKS4_WT_T	29989.7	23734.9	-0.337454	29989.7	23734.9	-0.337457	-0.320215	0.61605	0.210384	0.999503	protein_coding	chr17	45393902-45434421	-	ENSG00000159314.12
XLOC_003475	XLOC_003475	ARHGAP29	-11.8001	-0.118001	chr1:94168904-94336179	TKS4_WT	TKS4_WT_T	674102	594557	-0.181151	674102	594557	-0.181152	-0.149031	0.8358	0.0778976	0.999503	protein_coding	chr1	94148988-94275068	-	ENSG00000137962.13
XLOC_004111	XLOC_004111	ARHGAP30	-31.7044	-0.317044	chr1:161046941-161069971	TKS4_WT	TKS4_WT_T	249.953	170.707	-0.550136	249.953	170.707	-0.550135	0	1	0	1	protein_coding	chr1	161046946-161069970	-	ENSG00000186517.14
XLOC_035557	XLOC_035557	ARHGAP31	-42.6515	-0.426515	chr3:119294288-119420714	TKS4_WT	TKS4_WT_T	6548.94	3755.72	-0.802174	6548.94	3755.72	-0.802172	-0.690293	0.3566	0.447819	0.999503	protein_coding	chr3	119294383-119420714	+	ENSG00000031081.11
XLOC_009917	XLOC_009917	ARHGAP32	-32.9024	-0.329024	chr11:128965059-129283164	TKS4_WT	TKS4_WT_T	54237	36391.7	-0.575667	54237	36391.7	-0.575668	-0.567217	0.42725	0.369318	0.999503	protein_coding	chr11	128965060-129279324	-	ENSG00000134909.19
XLOC_024864	XLOC_024864	ARHGAP33	-39.5735	-0.395735	chr19:35775514-35788822	TKS4_WT	TKS4_WT_T	6504.76	3930.6	-0.726747	6504.76	3930.6	-0.726746	-0.531724	0.4471	0.349595	0.999503	protein_coding	chr19	35774532-35788822	+	ENSG00000004777.19
XLOC_025086	XLOC_025086	ARHGAP35	-16.8564	-0.168564	chr19:46860996-47005077	TKS4_WT	TKS4_WT_T	164869	137078	-0.266322	164869	137078	-0.266323	-0.29281	0.6882	0.162285	0.999503	protein_coding	chr19	46860997-47005077	+	ENSG00000160007.19
XLOC_056434	XLOC_056434	ARHGAP36	28351.2	283.512	chrX:131058345-131089885	TKS4_WT	TKS4_WT_T	0	28.4512		0.1	28.4512	8.15235	0	1	0	1	protein_coding	chrX	131058346-131089885	+	ENSG00000147256.12
XLOC_052836	XLOC_052836	ARHGAP39	-57.1877	-0.571877	chr8:144529178-144714830	TKS4_WT	TKS4_WT_T	23904.8	10234.2	-1.2239	23904.8	10234.2	-1.2239	-1.11867	0.10795	0.966777	0.999503	protein_coding	chr8	144529179-144685846	-	ENSG00000147799.12
XLOC_057681	XLOC_057681	ARHGAP4	14.5609	0.145609	chrX:153907377-153926264	TKS4_WT	TKS4_WT_T	19868.3	22761.3	0.196116	19868.3	22761.3	0.196115	0.172034	0.81315	0.0898293	0.999503	protein_coding	chrX	153907367-153934999	-	ENSG00000089820.16
XLOC_031695	XLOC_031695	ARHGAP40	-3.32868	-0.0332868	chr20:38601808-38650653	TKS4_WT	TKS4_WT_T	2161.82	2089.86	-0.0488384	2161.82	2089.86	-0.0488401	-0.039341	0.9539	0.0204972	0.999503	protein_coding	chr20	38601809-38651035	+	ENSG00000124143.11
XLOC_008222	XLOC_008222	ARHGAP42	-18.0409	-0.180409	chr11:100684160-100993941	TKS4_WT	TKS4_WT_T	42224.5	34606.8	-0.287025	42224.5	34606.8	-0.287025	-0.306447	0.66945	0.174282	0.999503	protein_coding	chr11	100687288-100993941	+	ENSG00000165895.19
XLOC_020693	XLOC_020693	ARHGAP44	-30.1212	-0.301212	chr17:12665889-13018027	TKS4_WT	TKS4_WT_T	6553.32	4579.38	-0.517073	6553.32	4579.38	-0.517074	-0.12027	0.73995	0.130798	0.999503	protein_coding	chr17	12789498-12991643	+	ENSG00000006740.18
XLOC_024269	XLOC_024269	ARHGAP45	-15.1809	-0.151809	chr19:1065958-1095387	TKS4_WT	TKS4_WT_T	21423	18170.8	-0.237538	21423	18170.8	-0.237539	-0.0994526	0.8576	0.0667152	0.999503	protein_coding	chr19	1065923-1086628	+	ENSG00000180448.11
XLOC_014307	XLOC_014307	ARHGAP5	-3.46002	-0.0346002	chr14:32072587-32159728	TKS4_WT	TKS4_WT_T	196733	189926	-0.0507997	196733	189926	-0.0508016	-0.0476572	0.9461	0.024063	0.999503	protein_coding	chr14	32076114-32159728	+	ENSG00000100852.14
XLOC_056717	XLOC_056717	ARHGAP6	80997.8	809.978	chrX:11137543-11665920	TKS4_WT	TKS4_WT_T	0	81.0978		0.1	81.0978	9.66352	0	1	0	1	protein_coding	chrX	11117651-11665920	-	ENSG00000047648.23
XLOC_033866	XLOC_033866	ARHGAP8,PRR5,PRR5-ARHGAP8	-6.16878	-0.0616878	chr22:44668750-44864239	TKS4_WT	TKS4_WT_T	41729.5	39155.3	-0.0918602	41729.5	39155.3	-0.09186	-0.0955733	0.89135	0.0499517	0.999503	protein_coding,protein_coding,protein_coding
XLOC_011980	XLOC_011980	ARHGAP9	277319	2773.19	chr12:57459784-57520517	TKS4_WT	TKS4_WT_T	0	277.419		0.1	277.419	11.4379		0.0641	1.19314	0.999503	protein_coding	chr12	57472264-57488814	-	ENSG00000123329.20
XLOC_022823	XLOC_022823	ARHGDIA	23.7578	0.237578	chr17:81867718-81871337	TKS4_WT	TKS4_WT_T	159611	197531	0.307522	159611	197531	0.307519	0.267534	0.68655	0.163328	0.999503	protein_coding	chr17	81867721-81871378	-	ENSG00000141522.12
XLOC_011571	XLOC_011571	ARHGDIB	32.2247	0.322247	chr12:14942014-14961601	TKS4_WT	TKS4_WT_T	1164.2	1539.36	0.402998	1164.2	1539.36	0.402992	0.27913	0.66705	0.175842	0.999503	protein_coding	chr12	14942031-14961728	-	ENSG00000111348.9
XLOC_024990	XLOC_024990	ARHGEF1	-10.1234	-0.101234	chr19:41883183-41907452	TKS4_WT	TKS4_WT_T	47425.9	42624.8	-0.153983	47425.9	42624.8	-0.153982	-0.131372	0.8549	0.0680847	0.999503	protein_coding	chr19	41883173-41930150	+	ENSG00000076928.18
XLOC_050729	XLOC_050729	ARHGEF10	-57.3718	-0.573718	chr8:1823925-1958641	TKS4_WT	TKS4_WT_T	74529	31770.4	-1.23012	74529	31770.4	-1.23012	-1.25539	0.0816	1.08831	0.999503	protein_coding	chr8	1823926-1958641	+	ENSG00000104728.16
XLOC_000268	XLOC_000268	ARHGEF10L	-35.8162	-0.358162	chr1:17513441-17697875	TKS4_WT	TKS4_WT_T	12839.8	8241.07	-0.639715	12839.8	8241.07	-0.639719	-0.492478	0.47375	0.324451	0.999503	protein_coding	chr1	17539698-17697874	+	ENSG00000074964.17
XLOC_004027	XLOC_004027	ARHGEF11	-22.6195	-0.226195	chr1:156920607-157046903	TKS4_WT	TKS4_WT_T	59115	45743.5	-0.369959	59115	45743.5	-0.369957	-0.399216	0.62315	0.205407	0.999503	protein_coding	chr1	156934840-157045742	-	ENSG00000132694.19
XLOC_008400	XLOC_008400	ARHGEF12	-33.9403	-0.339403	chr11:120336275-120489937	TKS4_WT	TKS4_WT_T	369481	244078	-0.598159	369481	244078	-0.598158	-0.582841	0.4194	0.377372	0.999503	protein_coding	chr11	120336413-120489937	+	ENSG00000196914.9
XLOC_020661	XLOC_020661	ARHGEF15	28351.2	283.512	chr17:8310240-8322516	TKS4_WT	TKS4_WT_T	0	28.4512		0.1	28.4512	8.15235	0	1	0	1	protein_coding	chr17	8310241-8322514	+	ENSG00000198844.12
XLOC_000085	XLOC_000085	ARHGEF16	-28.0732	-0.280732	chr1:3454588-3481115	TKS4_WT	TKS4_WT_T	30459.7	21908.7	-0.475399	30459.7	21908.7	-0.475398	-0.482378	0.5026	0.298778	0.999503	protein_coding	chr1	3454665-3481113	+	ENSG00000130762.15
XLOC_008018	XLOC_008018	ARHGEF17	7.14804	0.0714804	chr11:73305960-73369388	TKS4_WT	TKS4_WT_T	33508.5	35903.7	0.0996043	33508.5	35903.7	0.0996054	0.0924009	0.89745	0.0469897	0.999503	protein_coding	chr11	73308276-73369388	+	ENSG00000110237.5
XLOC_024382	XLOC_024382	ARHGEF18	-10.6784	-0.106784	chr19:7348900-7494977	TKS4_WT	TKS4_WT_T	38684.7	34553.8	-0.162919	38684.7	34553.8	-0.162919	-0.160447	0.819	0.0867161	0.999503	protein_coding	chr19	7348937-7472485	+	ENSG00000104880.19
XLOC_002705	XLOC_002705	ARHGEF19	8.25895	0.0825895	chr1:16197853-16212700	TKS4_WT	TKS4_WT_T	38496.4	41675.8	0.114485	38496.4	41675.8	0.114486	0.117633	0.86665	0.0621563	0.999503	protein_coding	chr1	16197854-16212652	-	ENSG00000142632.17
XLOC_004003	XLOC_004003	ARHGEF2	45.6826	0.456826	chr1:155946838-155991262	TKS4_WT	TKS4_WT_T	35609.8	51877.3	0.542827	35609.8	51877.3	0.542829	0.529736	0.47145	0.326564	0.999503	protein_coding	chr1	155946851-156007070	-	ENSG00000116584.22
XLOC_010719	XLOC_010719	ARHGEF25	-1.05139	-0.0105139	chr12:57610115-57617245	TKS4_WT	TKS4_WT_T	1913.66	1893.54	-0.0152452	1913.66	1893.54	-0.0152486	-0.0116399	0.98825	0.00513318	0.999503	protein_coding	chr12	57610180-57617245	+	ENSG00000240771.8
XLOC_035848	XLOC_035848	ARHGEF26	-6.75483	-0.0675483	chr3:154024400-154257827	TKS4_WT	TKS4_WT_T	16651.8	15527	-0.100894	16651.8	15527	-0.100899	-0.100247	0.8867	0.0522233	0.999503	protein_coding	chr3	154121003-154257827	+	ENSG00000114790.13
XLOC_040767	XLOC_040767	ARHGEF28	-13.4716	-0.134716	chr5:73626178-73941993	TKS4_WT	TKS4_WT_T	21296.6	18427.6	-0.208753	21296.6	18427.6	-0.208755	-0.21292	0.75875	0.119901	0.999503	protein_coding	chr5	73626158-73941993	+	ENSG00000214944.10
XLOC_036645	XLOC_036645	ARHGEF3	3.28948	0.0328948	chr3:56727418-57079308	TKS4_WT	TKS4_WT_T	24009.9	24799.7	0.0466931	24009.9	24799.7	0.0466933	0.0461721	0.952	0.0213631	0.999503	protein_coding	chr3	56727418-57079329	-	ENSG00000163947.12
XLOC_027892	XLOC_027892	ARHGEF33	145.876	1.45876	chr2:38889874-38975454	TKS4_WT	TKS4_WT_T	124.977	307.289	1.29794	124.977	307.289	1.29793	1.0346	0.4135	0.383524	0.999503	protein_coding	chr2	38889875-38975454	+	ENSG00000214694.12
XLOC_050458	XLOC_050458	ARHGEF35	-10.8389	-0.108389	chr7:144186082-144380632	TKS4_WT	TKS4_WT_T	6857.8	6114.49	-0.165515	6857.8	6114.49	-0.165514	-0.0635897	0.84915	0.0710156	0.999503	protein_coding	chr7	144186083-144195879	-	ENSG00000213214.6
XLOC_049197	XLOC_049197	ARHGEF35-AS1,OR2A1,OR2A9P	-99.8812	-0.998812	chr7:144186082-144380632	TKS4_WT	TKS4_WT_T	84.1803	0		84.1803	0.1	-9.71734		0.111	0.954677	0.999503	lncRNA,protein_coding,transcribed_unprocessed_pseudogene
XLOC_041266	XLOC_041266	ARHGEF37	-37.0411	-0.370411	chr5:149552056-149634968	TKS4_WT	TKS4_WT_T	6342.77	3993.34	-0.667519	6342.77	3993.34	-0.667517	-0.590661	0.39335	0.405221	0.999503	protein_coding	chr5	149551947-149634968	+	ENSG00000183111.12
XLOC_038513	XLOC_038513	ARHGEF38	26932.6	269.326	chr4:105552603-105682539	TKS4_WT	TKS4_WT_T	0	27.0326		0.1	27.0326	8.07856	0	1	0	1	protein_coding	chr4	105552620-105708093	+	ENSG00000236699.9
XLOC_054552	XLOC_054552	ARHGEF39	1.95573	0.0195573	chr9:35658291-35665205	TKS4_WT	TKS4_WT_T	27662.3	28203.3	0.0279464	27662.3	28203.3	0.0279429	0.0267521	0.9735	0.011664	0.999503	protein_coding	chr9	35658875-35675866	-	ENSG00000137135.18
XLOC_028629	XLOC_028629	ARHGEF4	-28.1175	-0.281175	chr2:130836913-131093468	TKS4_WT	TKS4_WT_T	27313.2	19633.4	-0.47629	27313.2	19633.4	-0.476288	-0.167799	0.63475	0.197397	0.999503	protein_coding	chr2	130836914-131047263	+	ENSG00000136002.20
XLOC_014199	XLOC_014199	ARHGEF40	-5.47708	-0.0547708	chr14:21016762-21104722	TKS4_WT	TKS4_WT_T	8963.9	8472.94	-0.0812639	8963.9	8472.94	-0.0812639	-0.0384356	0.95835	0.0184759	0.999503	protein_coding	chr14	21070273-21090248	+	ENSG00000165801.10
XLOC_049199	XLOC_049199	ARHGEF5	-9.05759	-0.0905759	chr7:144186082-144380632	TKS4_WT	TKS4_WT_T	29136.9	26497.8	-0.136977	29136.9	26497.8	-0.136975	-0.103753	0.888	0.051587	0.999503	protein_coding	chr7	144355288-144380632	+	ENSG00000050327.15
XLOC_057554	XLOC_057554	ARHGEF6	-27.2655	-0.272655	chrX:136665546-136780945	TKS4_WT	TKS4_WT_T	1950.08	1418.38	-0.459283	1950.08	1418.38	-0.459289	-0.323423	0.5913	0.228192	0.999503	protein_coding	chrX	136665547-136780932	-	ENSG00000129675.16
XLOC_013335	XLOC_013335	ARHGEF7	-12.272	-0.12272	chr13:111113811-111305734	TKS4_WT	TKS4_WT_T	75723.8	66431	-0.18889	75723.8	66431	-0.18889	-0.202224	0.76095	0.118644	0.999503	protein_coding	chr13	111114559-111305737	+	ENSG00000102606.19
XLOC_057053	XLOC_057053	ARHGEF9	-38.4003	-0.384003	chrX:63634966-63785546	TKS4_WT	TKS4_WT_T	12561.4	7737.78	-0.699001	12561.4	7737.78	-0.699006	-0.67023	0.30375	0.517484	0.999503	protein_coding	chrX	63634967-63809274	-	ENSG00000131089.17
XLOC_000394	XLOC_000394	ARID1A	-38.813	-0.38813	chr1:26696014-26782104	TKS4_WT	TKS4_WT_T	128686	78739.1	-0.708699	128686	78739.1	-0.708703	-0.706137	0.32495	0.488183	0.999503	protein_coding	chr1	26693236-26782104	+	ENSG00000117713.21
XLOC_044330	XLOC_044330	ARID1B	-19.4951	-0.194951	chr6:156776025-157210779	TKS4_WT	TKS4_WT_T	62157.1	50039.5	-0.31285	62157.1	50039.5	-0.312852	-0.321187	0.63455	0.197534	0.999503	protein_coding	chr6	156776020-157210779	+	ENSG00000049618.24
XLOC_010487	XLOC_010487	ARID2	-18.4066	-0.184066	chr12:45729705-45908037	TKS4_WT	TKS4_WT_T	107942	88073.6	-0.29348	107942	88073.6	-0.293475	-0.295635	0.6798	0.167619	0.999503	protein_coding	chr12	45729706-45908040	+	ENSG00000189079.17
XLOC_024263	XLOC_024263	ARID3A	-35.8916	-0.358916	chr19:925732-975939	TKS4_WT	TKS4_WT_T	18868.5	12096.3	-0.641411	18868.5	12096.3	-0.641414	-0.600486	0.41985	0.376906	0.999503	protein_coding	chr19	925781-975939	+	ENSG00000116017.11
XLOC_016844	XLOC_016844	ARID3B	-36.6656	-0.366656	chr15:74541219-74598131	TKS4_WT	TKS4_WT_T	9564.31	6057.5	-0.658937	9564.31	6057.5	-0.658938	-0.59064	0.3751	0.425853	0.999503	protein_coding	chr15	74541206-74598131	+	ENSG00000179361.18
XLOC_054528	XLOC_054528	ARID3C	-22.7673	-0.227673	chr9:34621048-34633112	TKS4_WT	TKS4_WT_T	827.076	638.773	-0.372716	827.076	638.773	-0.372717	-0.264525	0.6981	0.156082	0.999503	protein_coding	chr9	34621049-34629066	-	ENSG00000205143.5
XLOC_014493	XLOC_014493	ARID4A	-18.8499	-0.188499	chr14:58298384-58395848	TKS4_WT	TKS4_WT_T	16618.1	13485.6	-0.301335	16618.1	13485.6	-0.301336	-0.285728	0.688	0.162412	0.999503	protein_coding	chr14	58298504-58373887	+	ENSG00000032219.19
XLOC_004813	XLOC_004813	ARID4B	-5.45119	-0.0545119	chr1:235166894-235344532	TKS4_WT	TKS4_WT_T	55204.5	52195.2	-0.0808697	55204.5	52195.2	-0.0808687	-0.0702325	0.92595	0.0334125	0.999503	protein_coding	chr1	235131634-235328219	-	ENSG00000054267.22
XLOC_028322	XLOC_028322	ARID5A	20.3426	0.203426	chr2:96536751-96552638	TKS4_WT	TKS4_WT_T	9256.24	11139.2	0.267141	9256.24	11139.2	0.267147	0.244627	0.71445	0.146028	0.999503	protein_coding	chr2	96536743-96552634	+	ENSG00000196843.17
XLOC_005415	XLOC_005415	ARID5B	-24.2579	-0.242579	chr10:61901253-62096944	TKS4_WT	TKS4_WT_T	32093.4	24308.2	-0.400832	32093.4	24308.2	-0.400834	-0.400843	0.56695	0.246455	0.999503	protein_coding	chr10	61901684-62096944	+	ENSG00000150347.17
XLOC_016818	XLOC_016818	ARIH1,MIR630	0.513331	0.00513331	chr15:72474329-72602987	TKS4_WT	TKS4_WT_T	159741	160561	0.00738959	159741	160561	0.00738686	0.00763316	0.99175	0.00359779	0.999503	protein_coding,miRNA
XLOC_035114	XLOC_035114	ARIH2	2.65903	0.0265903	chr3:48917787-48986382	TKS4_WT	TKS4_WT_T	146783	150686	0.0378588	146783	150686	0.0378605	0.0405488	0.9557	0.0196784	0.999503	protein_coding	chr3	48918821-48986382	+	ENSG00000177479.20
XLOC_012260	XLOC_012260	ARL1	10.9135	0.109135	chr12:101393115-101407820	TKS4_WT	TKS4_WT_T	61810.8	68556.5	0.149433	61810.8	68556.5	0.149435	0.157564	0.82225	0.0849961	0.999503	protein_coding	chr12	101393116-101407772	-	ENSG00000120805.14
XLOC_041464	XLOC_041464	ARL10	-24.8539	-0.248539	chr5:176365473-176416569	TKS4_WT	TKS4_WT_T	151.445	113.805	-0.412231	151.445	113.805	-0.41223	0	1	0	1	protein_coding	chr5	176365487-176401865	+	ENSG00000175414.7
XLOC_013005	XLOC_013005	ARL11	-99.6799	-0.996799	chr13:49628455-49633872	TKS4_WT	TKS4_WT_T	31.2442	0		31.2442	0.1	-8.28744	0	1	0	1	protein_coding	chr13	49628507-49633872	+	ENSG00000152213.4
XLOC_035386	XLOC_035386	ARL13B	-20.5558	-0.205558	chr3:93980138-94055678	TKS4_WT	TKS4_WT_T	10650.1	8460.89	-0.331986	10650.1	8460.89	-0.331986	-0.296527	0.6793	0.167938	0.999503	protein_coding	chr3	93980139-94055678	+	ENSG00000169379.17
XLOC_035893	XLOC_035893	ARL14	-28.8804	-0.288804	chr3:160677159-160678448	TKS4_WT	TKS4_WT_T	344.085	244.712	-0.491678	344.085	244.712	-0.49168	-0.34468	0.72765	0.138077	0.999503	protein_coding	chr3	160677160-160678448	+	ENSG00000179674.4
XLOC_007445	XLOC_007445	ARL14EP	31.3202	0.313202	chr11:30323103-30338458	TKS4_WT	TKS4_WT_T	27152.8	35657.1	0.393087	27152.8	35657.1	0.393088	0.392266	0.5967	0.224244	0.999503	protein_coding	chr11	30323104-30338223	+	ENSG00000152219.5
XLOC_041011	XLOC_041011	ARL14EPL	-42.9993	-0.429993	chr5:116032471-116060023	TKS4_WT	TKS4_WT_T	14231.8	8112.22	-0.810953	14231.8	8112.22	-0.810949	-0.686778	0.35685	0.447514	0.999503	protein_coding	chr5	116032324-116060118	+	ENSG00000268223.7
XLOC_041856	XLOC_041856	ARL15	-33.6376	-0.336376	chr5:53883941-54310590	TKS4_WT	TKS4_WT_T	16618.9	11028.7	-0.591559	16618.9	11028.7	-0.591562	-0.550975	0.43825	0.358278	0.999503	protein_coding	chr5	53883942-54310582	-	ENSG00000185305.12
XLOC_022818	XLOC_022818	ARL16	7.43053	0.0743053	chr17:81681164-81683797	TKS4_WT	TKS4_WT_T	27566	29614.3	0.103407	27566	29614.3	0.103404	0.111819	0.8823	0.0543837	0.999503	protein_coding	chr17	81681187-81683797	-	ENSG00000214087.9
XLOC_022398	XLOC_022398	ARL17A	-11.283	-0.11283	chr17:46500212-47100283	TKS4_WT	TKS4_WT_T	9177.24	8141.77	-0.172717	9177.24	8141.77	-0.172718	-0.0404784	0.91935	0.0365191	0.999503	protein_coding	chr17	46516702-46579691	-	ENSG00000185829.18
XLOC_022396	XLOC_022396	ARL17B	-16.9287	-0.169287	chr17:46274183-46361787	TKS4_WT	TKS4_WT_T	5161.66	4287.86	-0.267579	5161.66	4287.86	-0.267577	-0.18838	0.81265	0.0900965	0.999503	protein_coding	chr17	46274784-46361797	-	ENSG00000228696.10
XLOC_007845	XLOC_007845	ARL2,ARL2-SNX15,SNX15	-20.2295	-0.202295	chr11:65014112-65040572	TKS4_WT	TKS4_WT_T	26527.1	21160.8	-0.326072	26527.1	21160.8	-0.326073	-0.357592	0.5963	0.224535	0.999503	protein_coding,protein_coding,protein_coding
XLOC_019045	XLOC_019045	ARL2BP	26.3172	0.263172	chr16:57245258-57253635	TKS4_WT	TKS4_WT_T	57401.2	72507.6	0.33705	57401.2	72507.6	0.337051	0.341261	0.62595	0.20346	0.999503	protein_coding	chr16	57245259-57253635	+	ENSG00000102931.8
XLOC_006862	XLOC_006862	ARL3	-8.24324	-0.0824324	chr10:102673730-102714397	TKS4_WT	TKS4_WT_T	27323	25070.7	-0.124111	27323	25070.7	-0.124114	-0.124834	0.8579	0.0665633	0.999503	protein_coding	chr10	102673731-102714397	-	ENSG00000138175.9
XLOC_048112	XLOC_048112	ARL4A	-1.97901	-0.0197901	chr7:12686902-12690958	TKS4_WT	TKS4_WT_T	30929.6	30317.5	-0.0288376	30929.6	30317.5	-0.0288374	-0.0288792	0.96905	0.0136538	0.999503	protein_coding	chr7	12686856-12690958	+	ENSG00000122644.13
XLOC_038115	XLOC_038115	ARL4AP2,NSUN7	29.0004	0.290004	chr4:40749873-41216714	TKS4_WT	TKS4_WT_T	1435.84	1852.24	0.367378	1435.84	1852.24	0.367376	0.0411068	0.84435	0.0734775	0.999503	processed_pseudogene,protein_coding
XLOC_044289	XLOC_044289	ARL4AP5,MTHFD1L,RPL32P16	82.6061	0.826061	chr6:150865683-151101887	TKS4_WT	TKS4_WT_T	100018	182639	0.868729	100018	182639	0.868735	0.841314	0.26725	0.573082	0.999503	processed_pseudogene,protein_coding,processed_pseudogene
XLOC_031248	XLOC_031248	ARL4C	-52.6099	-0.526099	chr2:234493040-234497081	TKS4_WT	TKS4_WT_T	13508.8	6401.84	-1.07735	13508.8	6401.84	-1.07734	-0.999561	0.15885	0.799013	0.999503	protein_coding	chr2	234493041-234497081	-	ENSG00000188042.8
XLOC_021145	XLOC_021145	ARL4D	24.6178	0.246178	chr17:43398992-43401137	TKS4_WT	TKS4_WT_T	12289.5	15314.9	0.317511	12289.5	15314.9	0.31751	0.318071	0.64735	0.188861	0.999503	protein_coding	chr17	43398993-43401137	+	ENSG00000175906.5
XLOC_030650	XLOC_030650	ARL5A	-24.5448	-0.245448	chr2:151798796-151828421	TKS4_WT	TKS4_WT_T	136530	103019	-0.406307	136530	103019	-0.406308	-0.408392	0.5519	0.25814	0.999503	protein_coding	chr2	151788984-151828492	-	ENSG00000162980.17
XLOC_005096	XLOC_005096	ARL5B	-8.81464	-0.0881464	chr10:18659334-18681639	TKS4_WT	TKS4_WT_T	108836	99242.5	-0.13312	108836	99242.5	-0.133126	-0.14512	0.84165	0.0748685	0.999503	protein_coding	chr10	18659431-18681639	+	ENSG00000165997.5
XLOC_035399	XLOC_035399	ARL6	6.1596	0.061596	chr3:97762580-97972431	TKS4_WT	TKS4_WT_T	7039.9	7473.53	0.0862345	7039.9	7473.53	0.0862349	0.0197026	0.91395	0.0390776	0.999503	protein_coding	chr3	97764521-97801229	+	ENSG00000113966.10
XLOC_019634	XLOC_019634	ARL6IP1	17.3842	0.173842	chr16:18791666-18801549	TKS4_WT	TKS4_WT_T	312002	366241	0.231237	312002	366241	0.231238	0.212158	0.7545	0.122341	0.999503	protein_coding	chr16	18791669-18801572	-	ENSG00000170540.15
XLOC_011238	XLOC_011238	ARL6IP4,OGFOD2	53.3352	0.533352	chr12:122917323-122982913	TKS4_WT	TKS4_WT_T	54316.8	83286.8	0.61669	54316.8	83286.8	0.616689	0.64024	0.41475	0.382214	0.999503	protein_coding,protein_coding
XLOC_035279	XLOC_035279	ARL6IP5	-2.79377	-0.0279377	chr3:69084936-69122595	TKS4_WT	TKS4_WT_T	27249.9	26488.6	-0.0408794	27249.9	26488.6	-0.0408793	-0.0399141	0.95585	0.0196103	0.999503	protein_coding	chr3	69084937-69106092	+	ENSG00000144746.7
XLOC_028755	XLOC_028755	ARL6IP6	-17.3767	-0.173767	chr2:152651592-152762396	TKS4_WT	TKS4_WT_T	34659.6	28636.9	-0.27538	34659.6	28636.9	-0.27538	-0.0883219	0.89475	0.0482983	0.999503	protein_coding	chr2	152717647-152762396	+	ENSG00000177917.12
XLOC_004437	XLOC_004437	ARL8A	-1.28066	-0.0128066	chr1:202118668-202144737	TKS4_WT	TKS4_WT_T	13172.9	13004.2	-0.0186002	13172.9	13004.2	-0.0185953	-0.0172287	0.9803	0.008641	0.999503	protein_coding	chr1	202133404-202144743	-	ENSG00000143862.8
XLOC_034742	XLOC_034742	ARL8B	-5.32257	-0.0532257	chr3:5122291-5180911	TKS4_WT	TKS4_WT_T	54327.1	51435.5	-0.0789097	54327.1	51435.5	-0.0789076	-0.0829453	0.9016	0.0449861	0.999503	protein_coding	chr3	5122249-5180911	+	ENSG00000134108.14
XLOC_038210	XLOC_038210	ARL9	-99.8812	-0.998812	chr4:56505208-56530486	TKS4_WT	TKS4_WT_T	84.1803	0		84.1803	0.1	-9.71734	0	1	0	1	protein_coding	chr4	56505209-56524959	+	ENSG00000196503.5
XLOC_052268	XLOC_052268	ARMC1	-15.6755	-0.156755	chr8:65602455-65634194	TKS4_WT	TKS4_WT_T	91867.8	77467.1	-0.245976	91867.8	77467.1	-0.245976	-0.255162	0.71595	0.145117	0.999503	protein_coding	chr8	65602458-65634217	-	ENSG00000104442.10
XLOC_048848	XLOC_048848	ARMC10	26.2637	0.262637	chr7:102748998-103099773	TKS4_WT	TKS4_WT_T	58063.1	73312.6	0.33644	58063.1	73312.6	0.33644	0.325727	0.6337	0.198116	0.999503	protein_coding	chr7	103074881-103099759	+	ENSG00000170632.14
XLOC_043549	XLOC_043549	ARMC12	52.9289	0.529289	chr6:35543357-35749079	TKS4_WT	TKS4_WT_T	711.651	1088.32	0.612857	711.651	1088.32	0.612861	0.071421	0.65235	0.185519	0.999503	protein_coding	chr6	35737032-35749079	+	ENSG00000157343.9
XLOC_044000	XLOC_044000	ARMC2	-12.8535	-0.128535	chr6:108848409-109094846	TKS4_WT	TKS4_WT_T	2354.06	2051.48	-0.198486	2354.06	2051.48	-0.198486	-0.0696018	0.788	0.103474	0.999503	protein_coding	chr6	108848416-108974476	+	ENSG00000118690.13
XLOC_005131	XLOC_005131	ARMC3	9.8378	0.098378	chr10:22928027-23095279	TKS4_WT	TKS4_WT_T	1207.18	1325.94	0.13537	1207.18	1325.94	0.135375	0.0988402	0.85655	0.0672473	0.999503	protein_coding	chr10	22928024-23038523	+	ENSG00000165309.14
XLOC_018831	XLOC_018831	ARMC5	63.6142	0.636142	chr16:31458272-31467167	TKS4_WT	TKS4_WT_T	12354	20212.9	0.710297	12354	20212.9	0.710298	0.65548	0.43665	0.359867	0.999503	protein_coding	chr16	31458080-31467166	+	ENSG00000140691.18
XLOC_024651	XLOC_024651	ARMC6	51.9161	0.519161	chr19:18990886-19058176	TKS4_WT	TKS4_WT_T	71918	109255	0.60328	71918	109255	0.603274	0.438085	0.66165	0.179372	0.999503	protein_coding	chr19	19033575-19060311	+	ENSG00000105676.14
XLOC_021513	XLOC_021513	ARMC7	-9.01061	-0.0901061	chr17:75109968-75154512	TKS4_WT	TKS4_WT_T	23932.9	21776.4	-0.13623	23932.9	21776.4	-0.13623	-0.042442	0.9534	0.0207249	0.999503	protein_coding	chr17	75109952-75130272	+	ENSG00000125449.7
XLOC_035741	XLOC_035741	ARMC8	4.67286	0.0467286	chr3:138187247-138331785	TKS4_WT	TKS4_WT_T	56053.5	58672.8	0.0658865	56053.5	58672.8	0.0658874	0.0709615	0.91845	0.0369445	0.999503	protein_coding	chr3	138187248-138298384	+	ENSG00000114098.18
XLOC_029307	XLOC_029307	ARMC9	-19.9307	-0.199307	chr2:231198627-231394991	TKS4_WT	TKS4_WT_T	17074.7	13671.6	-0.320671	17074.7	13671.6	-0.320678	-0.332863	0.63225	0.199111	0.999503	protein_coding	chr2	231198546-231376848	+	ENSG00000135931.19
XLOC_056220	XLOC_056220	ARMCX1	28351.2	283.512	chrX:101550546-101554700	TKS4_WT	TKS4_WT_T	0	28.4512		0.1	28.4512	8.15235	0	1	0	1	protein_coding	chrX	101550547-101554700	+	ENSG00000126947.13
XLOC_056222	XLOC_056222	ARMCX3	13.1394	0.131394	chrX:101623129-101631910	TKS4_WT	TKS4_WT_T	21817.6	24684.3	0.178101	21817.6	24684.3	0.178101	0.16941	0.8357	0.0779496	0.999503	protein_coding	chrX	101622797-101627843	+	ENSG00000102401.20
XLOC_056219	XLOC_056219	ARMCX4	-13.4796	-0.134796	chrX:101418277-101539446	TKS4_WT	TKS4_WT_T	62.4884	54.0652	-0.208887	62.4884	54.0652	-0.208888	0	1	0	1	protein_coding	chrX	101418287-101533459	+	ENSG00000196440.12
XLOC_057275	XLOC_057275	ARMCX6	16.467	0.16467	chrX:101615119-101618000	TKS4_WT	TKS4_WT_T	9369.09	10911.9	0.219928	9369.09	10911.9	0.219921	0.183219	0.80595	0.0936919	0.999503	protein_coding	chrX	101615118-101618001	-	ENSG00000198960.11
XLOC_000636	XLOC_000636	ARMH1	-19.1982	-0.191982	chr1:44674695-44725591	TKS4_WT	TKS4_WT_T	276.422	223.354	-0.307539	276.422	223.354	-0.30754	-0.100472	0.5453	0.263365	0.999503	protein_coding	chr1	44674692-44725591	+	ENSG00000198520.12
XLOC_006852	XLOC_006852	ARMH3	-19.4353	-0.194353	chr10:101844639-102056237	TKS4_WT	TKS4_WT_T	32584.5	26251.6	-0.311784	32584.5	26251.6	-0.311781	-0.303416	0.688	0.162412	0.999503	protein_coding	chr10	101845599-102056193	-	ENSG00000120029.13
XLOC_015397	XLOC_015397	ARMH4	-22.7007	-0.227007	chr14:57993535-58152305	TKS4_WT	TKS4_WT_T	3531.79	2730.05	-0.371469	3531.79	2730.05	-0.371472	-0.300279	0.7321	0.13543	0.999503	protein_coding	chr14	57999735-58298139	-	ENSG00000139971.15
XLOC_044295	XLOC_044295	ARMT1	13.9819	0.139819	chr6:151452465-151470101	TKS4_WT	TKS4_WT_T	42811.1	48796.9	0.188803	42811.1	48796.9	0.188805	0.189238	0.78735	0.103832	0.999503	protein_coding	chr6	151452258-151470101	+	ENSG00000146476.11
XLOC_003869	XLOC_003869	ARNT	-28.2468	-0.282468	chr1:150809712-150876737	TKS4_WT	TKS4_WT_T	32850.8	23571.5	-0.478882	32850.8	23571.5	-0.478885	-0.472854	0.51555	0.287729	0.999503	protein_coding	chr1	150809713-150876708	-	ENSG00000143437.21
XLOC_016919	XLOC_016919	ARNT2,MIR5572	-17.8382	-0.178382	chr15:80404381-80597933	TKS4_WT	TKS4_WT_T	6176.2	5074.48	-0.28346	6176.2	5074.48	-0.283459	-0.242264	0.7114	0.147886	0.999503	protein_coding,miRNA
XLOC_007341	XLOC_007341	ARNTL	46.71	0.4671	chr11:13276551-13387268	TKS4_WT	TKS4_WT_T	13016.7	19096.8	0.552964	13016.7	19096.8	0.552967	0.556209	0.40035	0.39756	0.999503	protein_coding	chr11	13276652-13387266	+	ENSG00000133794.20
XLOC_010400	XLOC_010400	ARNTL2	-42.0328	-0.420328	chr12:27332835-27506911	TKS4_WT	TKS4_WT_T	53832	31204.9	-0.786691	53832	31204.9	-0.786691	-0.840713	0.30905	0.509971	0.999503	protein_coding	chr12	27332836-27425289	+	ENSG00000029153.15
XLOC_048768	XLOC_048768	ARPC1A	-7.55795	-0.0755795	chr7:99325897-99366262	TKS4_WT	TKS4_WT_T	135804	125540	-0.113384	135804	125540	-0.113379	-0.12001	0.85635	0.0673487	0.999503	protein_coding	chr7	99325898-99366262	+	ENSG00000241685.10
XLOC_048769	XLOC_048769	ARPC1B	-1.68291	-0.0168291	chr7:99374253-99408597	TKS4_WT	TKS4_WT_T	114385	112460	-0.024481	114385	112460	-0.0244859	-0.0182865	0.9791	0.00917295	0.999503	protein_coding	chr7	99374249-99394816	+	ENSG00000130429.16
XLOC_029189	XLOC_029189	ARPC2	-2.12421	-0.0212421	chr2:218217137-218254348	TKS4_WT	TKS4_WT_T	147490	144357	-0.030973	147490	144357	-0.0309761	-0.0328447	0.9633	0.0162384	0.999503	protein_coding	chr2	218217141-218254356	+	ENSG00000163466.16
XLOC_012343	XLOC_012343	ARPC3	23.1722	0.231722	chr12:110434822-110450337	TKS4_WT	TKS4_WT_T	90147.8	111037	0.300673	90147.8	111037	0.300676	0.268894	0.70005	0.154871	0.999503	protein_coding	chr12	110434823-110450422	-	ENSG00000111229.16
XLOC_034768	XLOC_034768	ARPC4,ARPC4-TTLL3,TTLL3	27.6319	0.276319	chr3:9749951-9844059	TKS4_WT	TKS4_WT_T	125250	159859	0.351991	125250	159859	0.351989	0.253437	0.685	0.164309	0.999503	protein_coding,protein_coding,protein_coding
XLOC_004336	XLOC_004336	ARPC5	6.5874	0.065874	chr1:183620845-183635783	TKS4_WT	TKS4_WT_T	96245.9	102586	0.0920386	96245.9	102586	0.0920369	0.0964869	0.8867	0.0522233	0.999503	protein_coding	chr1	183620846-183635783	-	ENSG00000162704.16
XLOC_054066	XLOC_054066	ARPC5L	20.0071	0.200071	chr9:124862129-124877733	TKS4_WT	TKS4_WT_T	36464.6	43760.1	0.26312	36464.6	43760.1	0.263119	0.278317	0.7153	0.145512	0.999503	protein_coding	chr9	124862130-124877733	+	ENSG00000136950.13
XLOC_017502	XLOC_017502	ARPP19	11.9582	0.119582	chr15:52547044-52569446	TKS4_WT	TKS4_WT_T	256276	286922	0.162958	256276	286922	0.16296	0.157619	0.816	0.0883098	0.999503	protein_coding	chr15	52547045-52569883	-	ENSG00000128989.11
XLOC_056047	XLOC_056047	ARR3,RAB41	26932.6	269.326	chrX:70268333-70285002	TKS4_WT	TKS4_WT_T	0	27.0326		0.1	27.0326	8.07856	0	1	0	1	protein_coding,protein_coding
XLOC_009472	XLOC_009472	ARRB1	5.67048	0.0567048	chr11:75260121-75351662	TKS4_WT	TKS4_WT_T	47895.4	50611.3	0.0795733	47895.4	50611.3	0.0795724	0.0752347	0.9188	0.036779	0.999503	protein_coding	chr11	75260122-75351705	-	ENSG00000137486.17
XLOC_020562	XLOC_020562	ARRB2	6.29649	0.0629649	chr17:4710618-4721500	TKS4_WT	TKS4_WT_T	33579	35693.3	0.0880939	33579	35693.3	0.088094	0.0908009	0.89595	0.0477162	0.999503	protein_coding	chr17	4710596-4721499	+	ENSG00000141480.18
XLOC_054277	XLOC_054277	ARRDC1	-33.7574	-0.337574	chr9:137605640-137618895	TKS4_WT	TKS4_WT_T	20760.5	13752.3	-0.594171	20760.5	13752.3	-0.594168	-0.477682	0.46115	0.336158	0.999503	protein_coding	chr9	137605685-137615360	+	ENSG00000197070.14
XLOC_024624	XLOC_024624	ARRDC2	-0.687968	-0.00687968	chr19:18001123-18014102	TKS4_WT	TKS4_WT_T	15901.9	15792.5	-0.00996324	15901.9	15792.5	-0.00995958	-0.0083002	0.99015	0.00429901	0.999503	protein_coding	chr19	18001132-18014102	+	ENSG00000105643.11
XLOC_042142	XLOC_042142	ARRDC3	44.9934	0.449934	chr5:91368630-91420715	TKS4_WT	TKS4_WT_T	44020.9	63827.4	0.535987	44020.9	63827.4	0.535987	0.485894	0.486	0.313364	0.999503	protein_coding	chr5	91368631-91383317	-	ENSG00000113369.9
XLOC_017090	XLOC_017090	ARRDC4	97.1902	0.971902	chr15:97960702-97973833	TKS4_WT	TKS4_WT_T	8063.99	15901.4	0.979587	8063.99	15901.4	0.979588	0.913019	0.195	0.709965	0.999503	protein_coding	chr15	97960703-97973833	+	ENSG00000140450.9
XLOC_025581	XLOC_025581	ARRDC5,PLIN3	45.3546	0.453546	chr19:4838340-4962154	TKS4_WT	TKS4_WT_T	145134	210959	0.539581	145134	210959	0.539577	0.370389	0.57005	0.244087	0.999503	protein_coding,protein_coding
XLOC_034463	XLOC_034463	ARSA	28.7599	0.287599	chr22:50622753-50628152	TKS4_WT	TKS4_WT_T	5790.52	7455.87	0.364683	5790.52	7455.87	0.364684	0.261843	0.68795	0.162443	0.999503	protein_coding	chr22	50622754-50628173	-	ENSG00000100299.18
XLOC_042056	XLOC_042056	ARSB	-20.0328	-0.200328	chr5:78777208-78986087	TKS4_WT	TKS4_WT_T	21736.8	17382.3	-0.322524	21736.8	17382.3	-0.322521	-0.332408	0.63125	0.199799	0.999503	protein_coding	chr5	78777209-78986087	-	ENSG00000113273.17
XLOC_056678	XLOC_056678	ARSD	-14.6191	-0.146191	chrX:2903971-2929345	TKS4_WT	TKS4_WT_T	3930.6	3355.98	-0.228015	3930.6	3355.98	-0.228015	-0.184226	0.78255	0.106488	0.999503	protein_coding	chrX	2903972-2929349	-	ENSG00000006756.16
XLOC_021453	XLOC_021453	ARSG	-28.2704	-0.282704	chr17:68259169-68601367	TKS4_WT	TKS4_WT_T	13278.6	9524.69	-0.479358	13278.6	9524.69	-0.479359	-0.0950159	0.5006	0.300509	0.999503	protein_coding	chr17	68259182-68422731	+	ENSG00000141337.13
XLOC_042539	XLOC_042539	ARSI	-5.57357	-0.0557357	chr5:150296342-150302905	TKS4_WT	TKS4_WT_T	351.05	331.484	-0.0827346	351.05	331.484	-0.0827373	-0.0495291	0.94145	0.0262027	0.999503	protein_coding	chr5	150296343-150339307	-	ENSG00000183876.9
XLOC_039750	XLOC_039750	ARSJ	47.7218	0.477218	chr4:113899928-113981526	TKS4_WT	TKS4_WT_T	6656.81	9833.56	0.562883	6656.81	9833.56	0.562883	0.487274	0.53135	0.274619	0.999503	protein_coding	chr4	113900284-113979727	-	ENSG00000180801.14
XLOC_040901	XLOC_040901	ARSK	-8.79497	-0.0879497	chr5:95555100-95605102	TKS4_WT	TKS4_WT_T	8176.83	7457.68	-0.132814	8176.83	7457.68	-0.132815	-0.116229	0.8683	0.0613302	0.999503	protein_coding	chr5	95555101-95605102	+	ENSG00000164291.17
XLOC_007200	XLOC_007200	ART1	-99.6799	-0.996799	chr11:3645109-3665516	TKS4_WT	TKS4_WT_T	31.2442	0		31.2442	0.1	-8.28744	0	1	0	1	protein_coding	chr11	3645128-3664416	+	ENSG00000129744.3
XLOC_038348	XLOC_038348	ART3	56802.4	568.024	chr4:76011167-76112802	TKS4_WT	TKS4_WT_T	0	56.9024		0.1	56.9024	9.15235	0	1	0	1	protein_coding	chr4	76011184-76112802	+	ENSG00000156219.17
XLOC_011568	XLOC_011568	ART4	137900	1379	chr12:14825568-14843526	TKS4_WT	TKS4_WT_T	0	138		0.1	138	10.4305		0.01985	1.70224	0.999503	protein_coding	chr12	14825569-14843526	-	ENSG00000111339.12
XLOC_008631	XLOC_008631	ART5	1.29808	0.0129808	chr11:3638502-3642392	TKS4_WT	TKS4_WT_T	2849.59	2886.58	0.0186041	2849.59	2886.58	0.0186069	0.0145337	0.9836	0.00718148	0.999503	protein_coding	chr11	3638512-3642316	-	ENSG00000167311.14
XLOC_000623	XLOC_000623	ARTN	-19.9705	-0.199705	chr1:43933800-43937240	TKS4_WT	TKS4_WT_T	5612.02	4491.27	-0.321396	5612.02	4491.27	-0.321397	-0.267301	0.7081	0.149905	0.999503	protein_coding	chr1	43933320-43937240	+	ENSG00000117407.17
XLOC_002298	XLOC_002298	ARV1	6.37342	0.0637342	chr1:230979081-231000733	TKS4_WT	TKS4_WT_T	1967.39	2092.78	0.089137	1967.39	2092.78	0.0891377	0.0676051	0.9196	0.036401	0.999503	protein_coding	chr1	230978981-231000733	+	ENSG00000173409.14
XLOC_034015	XLOC_034015	ARVCF	-6.51707	-0.0651707	chr22:19875517-20016823	TKS4_WT	TKS4_WT_T	23769.9	22220.8	-0.0972245	23769.9	22220.8	-0.0972251	-0.0528452	0.92815	0.0323818	0.999503	protein_coding	chr22	19969896-20016823	-	ENSG00000099889.14
XLOC_056803	XLOC_056803	ARX	72.1108	0.721108	chrX:25003693-25015965	TKS4_WT	TKS4_WT_T	425.678	732.638	0.78334	425.678	732.638	0.783338	0.424217	0.5477	0.261457	0.999503	protein_coding	chrX	25003694-25016420	-	ENSG00000004848.8
XLOC_005786	XLOC_005786	AS3MT,BORCS7,BORCS7-ASMT	104.937	1.04937	chr10:102854209-103193301	TKS4_WT	TKS4_WT_T	18799.9	38527.9	1.03518	18799.9	38527.9	1.03518	0.452655	0.59905	0.222537	0.999503	protein_coding,protein_coding,protein_coding
XLOC_051933	XLOC_051933	ASAH1	39.0651	0.390651	chr8:18055991-18097651	TKS4_WT	TKS4_WT_T	56119.4	78042.5	0.475761	56119.4	78042.5	0.47576	0.484871	0.4989	0.301986	0.999503	protein_coding	chr8	18055992-18084998	-	ENSG00000104763.20
XLOC_006447	XLOC_006447	ASAH2	27.7787	0.277787	chr10:50184860-50251564	TKS4_WT	TKS4_WT_T	2698.94	3448.67	0.353643	2698.94	3448.67	0.353647	0.250279	0.712	0.14752	0.999503	protein_coding	chr10	50182778-50279720	-	ENSG00000188611.17
XLOC_005377	XLOC_005377	ASAH2B	16.6878	0.166878	chr10:50739935-50759255	TKS4_WT	TKS4_WT_T	24848.1	28994.7	0.222653	24848.1	28994.7	0.222654	0.229005	0.77475	0.110838	0.999503	protein_coding	chr10	50739318-50816495	+	ENSG00000204147.11
XLOC_052715	XLOC_052715	ASAP1	-18.7664	-0.187664	chr8:130052103-130443848	TKS4_WT	TKS4_WT_T	79563.3	64632.1	-0.299852	79563.3	64632.1	-0.299852	-0.351766	0.635	0.197226	0.999503	protein_coding	chr8	130052104-130443674	-	ENSG00000153317.15
XLOC_027651	XLOC_027651	ASAP2	-56.2963	-0.562963	chr2:9206811-9423569	TKS4_WT	TKS4_WT_T	56474.8	24681.6	-1.19417	56474.8	24681.6	-1.19417	-0.892617	0.174	0.759451	0.999503	protein_coding	chr2	9206765-9405683	+	ENSG00000151693.11
XLOC_002794	XLOC_002794	ASAP3	-36.9182	-0.369182	chr1:23428562-23484631	TKS4_WT	TKS4_WT_T	18452.4	11640.1	-0.664706	18452.4	11640.1	-0.664705	-0.666552	0.3947	0.403733	0.999503	protein_coding	chr1	23428563-23484568	-	ENSG00000088280.20
XLOC_029386	XLOC_029386	ASB1	-10.9298	-0.109298	chr2:238426926-238456676	TKS4_WT	TKS4_WT_T	35101.2	31264.7	-0.166983	35101.2	31264.7	-0.166986	-0.149306	0.84255	0.0744043	0.999503	protein_coding	chr2	238426742-238452250	+	ENSG00000065802.12
XLOC_057058	XLOC_057058	ASB12	1052.01	10.5201	chrX:64224193-64230607	TKS4_WT	TKS4_WT_T	31.2442	359.935	3.52608	31.2442	359.935	3.52608	3.08503	0.01435	1.84315	0.999503	protein_coding	chrX	64224194-64230607	-	ENSG00000198881.10
XLOC_006094	XLOC_006094	ASB13	5.26534	0.0526534	chr10:5638866-5666595	TKS4_WT	TKS4_WT_T	13045.7	13732.6	0.0740284	13045.7	13732.6	0.0740304	0.0709766	0.91685	0.0377017	0.999503	protein_coding	chr10	5638867-5666595	-	ENSG00000196372.13
XLOC_036649	XLOC_036649	ASB14	19.9007	0.199007	chr3:57227728-57293048	TKS4_WT	TKS4_WT_T	93.7326	112.386	0.261842	93.7326	112.386	0.26184	0.0204591	0.88265	0.0542115	0.999503	protein_coding	chr3	57268342-57292685	-	ENSG00000239388.9
XLOC_048962	XLOC_048962	ASB15	113705	1137.05	chr7:123536996-123639481	TKS4_WT	TKS4_WT_T	0	113.805		0.1	113.805	10.1523	0	1	0	1	protein_coding	chr7	123567010-123639481	+	ENSG00000146809.14
XLOC_021164	XLOC_021164	ASB16	6.52763	0.0652763	chr17:44170703-44186717	TKS4_WT	TKS4_WT_T	396.622	422.512	0.0912275	396.622	422.512	0.0912276	0.0192511	0.94395	0.025051	0.999503	protein_coding	chr17	44170447-44179084	+	ENSG00000161664.7
XLOC_031261	XLOC_031261	ASB18	170.913	1.70913	chr2:236193451-236264345	TKS4_WT	TKS4_WT_T	62.4884	169.289	1.43782	62.4884	169.289	1.43783	0.935512	0.40415	0.393457	0.999503	protein_coding	chr2	236193459-236264409	-	ENSG00000182177.15
XLOC_015687	XLOC_015687	ASB2	614.865	6.14865	chr14:93934159-93976739	TKS4_WT	TKS4_WT_T	31.2442	223.354	2.83767	31.2442	223.354	2.83767	1.49553	0.2175	0.662541	0.999503	protein_coding	chr14	93934166-93976739	-	ENSG00000100628.12
XLOC_029834	XLOC_029834	ASB3,GPR75,GPR75-ASB3	6.41968	0.0641968	chr2:53669979-53859967	TKS4_WT	TKS4_WT_T	20800.1	22135.4	0.0897629	20800.1	22135.4	0.089765	0.0579769	0.92455	0.0340696	0.999503	protein_coding,protein_coding,-
XLOC_048737	XLOC_048737	ASB4	164.101	1.64101	chr7:95485438-95544738	TKS4_WT	TKS4_WT_T	31.2442	82.5164	1.40109	31.2442	82.5164	1.40109	0.768119	0.559	0.252588	0.999503	protein_coding	chr7	95478444-95540233	+	ENSG00000005981.13
XLOC_040102	XLOC_040102	ASB5	162096	1620.96	chr4:176213672-176277571	TKS4_WT	TKS4_WT_T	0	162.196		0.1	162.196	10.6635	0	1	0	1	protein_coding	chr4	176213673-176277571	-	ENSG00000164122.9
XLOC_055278	XLOC_055278	ASB6	13.3728	0.133728	chr9:129608871-129642151	TKS4_WT	TKS4_WT_T	35459.4	40201.3	0.181075	35459.4	40201.3	0.181074	0.134117	0.84705	0.072091	0.999503	protein_coding	chr9	129634604-129642169	-	ENSG00000148331.12
XLOC_017111	XLOC_017111	ASB7	-10.0042	-0.100042	chr15:100566913-100651701	TKS4_WT	TKS4_WT_T	33666.7	30298.6	-0.15207	33666.7	30298.6	-0.152071	-0.108482	0.873	0.0589858	0.999503	protein_coding	chr15	100602589-100651701	+	ENSG00000183475.13
XLOC_011773	XLOC_011773	ASB8	7.15159	0.0715159	chr12:48147788-48157515	TKS4_WT	TKS4_WT_T	12759.4	13671.9	0.0996521	12759.4	13671.9	0.0996533	0.102591	0.8814	0.054827	0.999503	protein_coding	chr12	48147789-48181213	-	ENSG00000177981.11
XLOC_056741	XLOC_056741	ASB9	-37.7269	-0.377269	chrX:15243986-15270476	TKS4_WT	TKS4_WT_T	1690.57	1052.77	-0.683315	1690.57	1052.77	-0.683319	-0.475262	0.5119	0.290815	0.999503	protein_coding	chrX	15235288-15270467	-	ENSG00000102048.16
XLOC_006577	XLOC_006577	ASCC1	-8.5383	-0.085383	chr10:72096031-72235860	TKS4_WT	TKS4_WT_T	36994.5	33835.8	-0.128761	36994.5	33835.8	-0.12876	-0.0852525	0.91355	0.0392677	0.999503	protein_coding	chr10	72096032-72217134	-	ENSG00000138303.18
XLOC_034168	XLOC_034168	ASCC2	-18.3302	-0.183302	chr22:29788607-29838282	TKS4_WT	TKS4_WT_T	40317.6	32927.3	-0.292123	40317.6	32927.3	-0.292126	-0.317339	0.6525	0.185419	0.999503	protein_coding	chr22	29788609-29838304	-	ENSG00000100325.15
XLOC_045415	XLOC_045415	ASCC3	6.99824	0.0699824	chr6:100508193-101248498	TKS4_WT	TKS4_WT_T	174844	187080	0.0975823	174844	187080	0.097587	0.0916535	0.8901	0.0505612	0.999503	protein_coding	chr6	100508194-100881372	-	ENSG00000112249.14
XLOC_011037	XLOC_011037	ASCL1	-99.8933	-0.998933	chr12:102836888-102960513	TKS4_WT	TKS4_WT_T	93.7326	0		93.7326	0.1	-9.87241	0	1	0	1	protein_coding	chr12	102957674-102960513	+	ENSG00000139352.4
XLOC_004423	XLOC_004423	ASCL5	-9.7489	-0.097489	chr1:201113942-201127184	TKS4_WT	TKS4_WT_T	338.91	305.87	-0.147982	338.91	305.87	-0.147984	-0.0807715	0.9106	0.0406724	0.999503	protein_coding	chr1	201113943-201127184	-	ENSG00000232237.5
XLOC_028973	XLOC_028973	ASDURF,ASNSD1	12.9201	0.129201	chr2:189661398-189670831	TKS4_WT	TKS4_WT_T	77709.8	87750	0.175303	77709.8	87750	0.175303	0.163951	0.81395	0.0894023	0.999503	protein_coding,protein_coding
XLOC_044086	XLOC_044086	ASF1A	44.383	0.44383	chr6:118813448-118935159	TKS4_WT	TKS4_WT_T	34444.3	49731.7	0.529902	34444.3	49731.7	0.5299	0.418116	0.5645	0.248336	0.999503	protein_coding	chr6	118894152-118909171	+	ENSG00000111875.8
XLOC_025782	XLOC_025782	ASF1B	-36.1025	-0.361025	chr19:14119511-14136589	TKS4_WT	TKS4_WT_T	83944.7	53638.6	-0.646168	83944.7	53638.6	-0.646168	-0.685144	0.3223	0.49174	0.999503	protein_coding	chr19	14119512-14136613	-	ENSG00000105011.9
XLOC_021775	XLOC_021775	ASGR1	84.5535	0.845535	chr17:7173430-7179426	TKS4_WT	TKS4_WT_T	182.689	337.159	0.884038	182.689	337.159	0.884039	0.395219	0.4759	0.322484	0.999503	protein_coding	chr17	7173431-7179564	-	ENSG00000141505.12
XLOC_003989	XLOC_003989	ASH1L,MIR555	-17.6412	-0.176412	chr1:155335262-155563944	TKS4_WT	TKS4_WT_T	156265	128698	-0.280007	156265	128698	-0.280005	-0.28326	0.7261	0.139004	0.999503	protein_coding,miRNA
XLOC_051053	XLOC_051053	ASH2L	-2.12921	-0.0212921	chr8:38104964-38140080	TKS4_WT	TKS4_WT_T	38850.1	38022.9	-0.0310475	38850.1	38022.9	-0.0310497	-0.0336372	0.96675	0.0146858	0.999503	protein_coding	chr8	38105493-38144076	+	ENSG00000129691.16
XLOC_033580	XLOC_033580	ASH2LP1,ASH2LP2,ASH2LP3,BCRP4,BMP6P1,BMS1P20,GGTLC2,IGLC1,IGLC2,IGLC3,IGLC4,IGLC5,IGLC6,IGLC7,IGLJ1,IGLJ2,IGLJ3,IGLJ4,IGLJ5,IGLJ6,IGLJ7,IGLL5,IGLV1-36,IGLV1-40,IGLV1-41,IGLV1-44,IGLV1-47,IGLV1-50,IGLV1-51,IGLV1-62,IGLV10-54,IGLV10-67,IGLV11-55,IGLV2-11,IGLV2-14,IGLV2-18,IGLV2-23,IGLV2-28,IGLV2-33,IGLV2-34,IGLV2-5,IGLV2-8,IGLV3-1,IGLV3-10,IGLV3-12,IGLV3-13,IGLV3-15,IGLV3-16,IGLV3-17,IGLV3-19,IGLV3…	67.4925	0.674925	chr22:21991098-22924966	TKS4_WT	TKS4_WT_T	69503.4	116413	0.744094	69503.4	116413	0.744097	0.589992	0.41595	0.380959	0.999503	processed_pseudogene,processed_pseudogene,unprocessed_pseudogene,unprocessed_pseudogene,processed_pseudogene,transcribed_unprocessed_pseudogene,protein_coding,IG_C_gene,IG_C_gene,IG_C_gene,IG_C_pseudogene,IG_C_pseudogene,IG_C_pseudogene,IG_C_gene,IG_J_gene,IG_J_gene,IG_J_gene,IG_J_gene,IG_J_gene,IG_J_gene,IG_J_gene,protein_coding,IG_V_gene,IG_V_gene,IG_V_pseudogene,IG_V_gene,IG_V_gene,IG_V_gene,I…
XLOC_010553	XLOC_010553	ASIC1	75.7152	0.757152	chr12:50057595-50083622	TKS4_WT	TKS4_WT_T	22646.7	39793.7	0.813241	22646.7	39793.7	0.813239	0.792082	0.27265	0.564394	0.999503	protein_coding	chr12	50057548-50083611	+	ENSG00000110881.12
XLOC_049270	XLOC_049270	ASIC3	-95.4119	-0.954119	chr7:151048291-151052756	TKS4_WT	TKS4_WT_T	620.108	28.4512	-4.44596	620.108	28.4512	-4.44596	-3.85658	0.2153	0.666956	0.999503	protein_coding	chr7	151048292-151052756	+	ENSG00000213199.8
XLOC_029228	XLOC_029228	ASIC4	-29.202	-0.29202	chr2:219434214-219538772	TKS4_WT	TKS4_WT_T	391.846	277.419	-0.49822	391.846	277.419	-0.49822	-0.0363484	0.7816	0.107015	0.999503	protein_coding	chr2	219514170-219538772	+	ENSG00000072182.14
XLOC_031640	XLOC_031640	ASIP	-1.40317	-0.0140317	chr20:34186492-34311976	TKS4_WT	TKS4_WT_T	57.7122	56.9024	-0.020388	57.7122	56.9024	-0.0203868	-0.000449317	0.80665	0.0933149	0.999503	protein_coding	chr20	34194569-34269344	+	ENSG00000101440.10
XLOC_048541	XLOC_048541	ASL	4.74414	0.0474414	chr7:66075818-66093576	TKS4_WT	TKS4_WT_T	34708.1	36354.7	0.066869	34708.1	36354.7	0.0668695	0.0699931	0.92895	0.0320077	0.999503	protein_coding	chr7	66075800-66094697	+	ENSG00000126522.17
XLOC_056672	XLOC_056672	ASMTL	-30.0795	-0.300795	chrX:1400530-1453794	TKS4_WT	TKS4_WT_T	20757.3	14513.6	-0.516215	20757.3	14513.6	-0.516213	-0.438858	0.52075	0.283371	0.999503	protein_coding	chrY	1403139-1453762	-	ENSG00000169093.16_PAR_Y
XLOC_050078	XLOC_050078	ASNS,CCZ1P,CCZ1P-OR7E38P,CZ1P-ASNS,OR7E38P	173.98	1.7398	chr7:97851676-97972358	TKS4_WT	TKS4_WT_T	111411	305244	1.45407	111411	305244	1.45407	1.48834	0.04865	1.31292	0.999503	protein_coding,-,-,-,unprocessed_pseudogene
XLOC_014986	XLOC_014986	ASPG	-99.84	-0.9984	chr14:104085657-104115582	TKS4_WT	TKS4_WT_T	62.4884	0		62.4884	0.1	-9.28744	0	1	0	1	protein_coding	chr14	104085686-104115582	+	ENSG00000166183.16
XLOC_052246	XLOC_052246	ASPH	-30.5448	-0.305448	chr8:60964832-61714640	TKS4_WT	TKS4_WT_T	401217	278666	-0.525845	401217	278666	-0.525846	-0.526282	0.4731	0.325047	0.999503	protein_coding	chr8	61500556-61714640	-	ENSG00000198363.18
XLOC_018786	XLOC_018786	ASPHD1	-5.63688	-0.0563688	chr16:29900391-29926226	TKS4_WT	TKS4_WT_T	3796.07	3582.09	-0.0837043	3796.07	3582.09	-0.083705	-0.0388489	0.9712	0.0126913	0.999503	protein_coding	chr16	29900375-29919864	+	ENSG00000174939.11
XLOC_033626	XLOC_033626	ASPHD2	9.7691	0.097691	chr22:26429259-26483863	TKS4_WT	TKS4_WT_T	8601.71	9442.02	0.134471	8601.71	9442.02	0.134472	0.0642957	0.9169	0.037678	0.999503	protein_coding	chr22	26429260-26445015	+	ENSG00000128203.7
XLOC_004395	XLOC_004395	ASPM	-20.9741	-0.209741	chr1:197084126-197146669	TKS4_WT	TKS4_WT_T	218517	172685	-0.339607	218517	172685	-0.339603	-0.334381	0.6462	0.189633	0.999503	protein_coding	chr1	197084121-197146694	-	ENSG00000066279.19
XLOC_054912	XLOC_054912	ASPN	-99.6799	-0.996799	chr9:92297357-92670259	TKS4_WT	TKS4_WT_T	31.2442	0		31.2442	0.1	-8.28744	0	1	0	1	protein_coding	chr9	92456205-92482506	-	ENSG00000106819.13
XLOC_029972	XLOC_029972	ASPRV1,PCBP1-AS1	361.164	3.61164	chr2:69915108-70087375	TKS4_WT	TKS4_WT_T	6470.73	29840.7	2.20528	6470.73	29840.7	2.20528	1.79159	0.0246	1.60906	0.999503	protein_coding,lncRNA
XLOC_021623	XLOC_021623	ASPSCR1	-3.7553	-0.037553	chr17:81977549-82017669	TKS4_WT	TKS4_WT_T	19079.7	18363.2	-0.0552152	19079.7	18363.2	-0.055221	-0.054558	0.9366	0.0284458	0.999503	protein_coding	chr17	81976807-82017406	+	ENSG00000169696.16
XLOC_007788	XLOC_007788	ASRGL1	-6.48533	-0.0648533	chr11:62337429-62401401	TKS4_WT	TKS4_WT_T	21833.9	20417.9	-0.0967389	21833.9	20417.9	-0.0967354	-0.0902245	0.90095	0.0452993	0.999503	protein_coding	chr11	62337448-62393412	+	ENSG00000162174.12
XLOC_054151	XLOC_054151	ASS1	-0.783147	-0.00783147	chr9:130444706-130502592	TKS4_WT	TKS4_WT_T	26597.8	26389.5	-0.0113429	26597.8	26389.5	-0.0113429	-0.01115	0.9866	0.00585889	0.999503	protein_coding	chr9	130444961-130501274	+	ENSG00000130707.18
XLOC_037082	XLOC_037082	ASTE1	36.3167	0.363167	chr3:130748959-131026825	TKS4_WT	TKS4_WT_T	5807.05	7915.98	0.446963	5807.05	7915.98	0.446963	0.107968	0.7076	0.150212	0.999503	protein_coding	chr3	131013875-131027649	-	ENSG00000034533.12
XLOC_030237	XLOC_030237	ASTL	-63.7885	-0.637885	chr2:96122816-96143059	TKS4_WT	TKS4_WT_T	3084.02	1116.77	-1.46548	3084.02	1116.77	-1.46548	-0.977444	0.20565	0.686871	0.999503	protein_coding	chr2	96122818-96138502	-	ENSG00000188886.4
XLOC_055145	XLOC_055145	ASTN2	-40.6631	-0.406631	chr9:116423111-117415057	TKS4_WT	TKS4_WT_T	9707.79	5760.3	-0.752998	9707.79	5760.3	-0.752999	-0.33662	0.6	0.221849	0.999503	protein_coding	chr9	116423112-117415070	-	ENSG00000148219.18
XLOC_031611	XLOC_031611	ASXL1	1.37597	0.0137597	chr20:32358061-32439319	TKS4_WT	TKS4_WT_T	81833.3	82959.3	0.0197148	81833.3	82959.3	0.0197157	0.0201062	0.98015	0.00870746	0.999503	protein_coding	chr20	32358330-32439319	+	ENSG00000171456.21
XLOC_029612	XLOC_029612	ASXL2	-19.1416	-0.191416	chr2:25733752-25878487	TKS4_WT	TKS4_WT_T	95125.9	76917.3	-0.306531	95125.9	76917.3	-0.30653	-0.357268	0.60695	0.216847	0.999503	protein_coding	chr2	25733753-25878487	-	ENSG00000143970.18
XLOC_023441	XLOC_023441	ASXL3	113705	1137.05	chr18:33578218-33821235	TKS4_WT	TKS4_WT_T	0	113.805		0.1	113.805	10.1523	0	1	0	1	protein_coding	chr18	33578219-33751195	+	ENSG00000141431.13
XLOC_050249	XLOC_050249	ASZ1	189128	1891.28	chr7:117363221-117427493	TKS4_WT	TKS4_WT_T	0	189.228		0.1	189.228	10.8859	0	1	0	1	protein_coding	chr7	117363222-117428123	-	ENSG00000154438.8
XLOC_006707	XLOC_006707	ATAD1	39.2491	0.392491	chr10:87751511-87845612	TKS4_WT	TKS4_WT_T	86060.9	119839	0.477662	86060.9	119839	0.477668	0.504301	0.497	0.303644	0.999503	protein_coding	chr10	87751512-87841361	-	ENSG00000138138.14
XLOC_052670	XLOC_052670	ATAD2	-11.6562	-0.116562	chr8:123319849-123396447	TKS4_WT	TKS4_WT_T	310856	274622	-0.178797	310856	274622	-0.178799	-0.172245	0.8058	0.0937727	0.999503	protein_coding	chr8	123319850-123416350	-	ENSG00000156802.13
XLOC_029591	XLOC_029591	ATAD2B	-30.1364	-0.301364	chr2:23385178-23927123	TKS4_WT	TKS4_WT_T	36190.4	25283.9	-0.517386	36190.4	25283.9	-0.517388	-0.40203	0.5845	0.233215	0.999503	protein_coding	chr2	23748664-23927123	-	ENSG00000119778.15
XLOC_000052	XLOC_000052	ATAD3A	-33.4377	-0.334377	chr1:1512142-1534687	TKS4_WT	TKS4_WT_T	85429.2	56863.6	-0.587224	85429.2	56863.6	-0.587224	-0.631781	0.3713	0.430275	0.999503	protein_coding	chr1	1512162-1534685	+	ENSG00000197785.14
XLOC_000051	XLOC_000051	ATAD3B	16.9439	0.169439	chr1:1471731-1509466	TKS4_WT	TKS4_WT_T	81127.1	94873.2	0.225817	81127.1	94873.2	0.225817	0.236772	0.7242	0.140141	0.999503	protein_coding	chr1	1471765-1497848	+	ENSG00000160072.20
XLOC_000050	XLOC_000050	ATAD3C	5.00132	0.0500132	chr1:1449688-1470163	TKS4_WT	TKS4_WT_T	1396.83	1466.69	0.0704073	1396.83	1466.69	0.0704075	0.0497491	0.9436	0.0252121	0.999503	protein_coding	chr1	1449689-1470163	+	ENSG00000215915.10
XLOC_020923	XLOC_020923	ATAD5,RPS17P3	-13.2501	-0.132501	chr17:30830829-30895869	TKS4_WT	TKS4_WT_T	39722.7	34459.4	-0.205068	39722.7	34459.4	-0.205066	-0.211204	0.75865	0.119959	0.999503	protein_coding,-
XLOC_043412	XLOC_043412	ATAT1	-18.1062	-0.181062	chr6:30626873-30646821	TKS4_WT	TKS4_WT_T	8626.98	7064.96	-0.288174	8626.98	7064.96	-0.288174	-0.280591	0.74115	0.130094	0.999503	protein_coding	chr6	30626842-30646823	+	ENSG00000137343.18
XLOC_006984	XLOC_006984	ATE1	6.62895	0.0662895	chr10:121740420-121951965	TKS4_WT	TKS4_WT_T	78317.1	83508.7	0.0925992	78317.1	83508.7	0.0925992	0.0937481	0.90495	0.0433754	0.999503	protein_coding	chr10	121709393-121928801	-	ENSG00000107669.19
XLOC_010565	XLOC_010565	ATF1	27.1076	0.271076	chr12:50763681-50821162	TKS4_WT	TKS4_WT_T	32656.2	41508.5	0.346051	32656.2	41508.5	0.34605	0.348934	0.6795	0.167811	0.999503	protein_coding	chr12	50763710-50821162	+	ENSG00000123268.9
XLOC_030813	XLOC_030813	ATF2	-21.7337	-0.217337	chr2:175072249-175168203	TKS4_WT	TKS4_WT_T	43904.1	34362.1	-0.353536	43904.1	34362.1	-0.353537	-0.388463	0.5965	0.22439	0.999503	protein_coding	chr2	175072250-175168382	-	ENSG00000115966.18
XLOC_002151	XLOC_002151	ATF3	-12.9144	-0.129144	chr1:212565406-212620777	TKS4_WT	TKS4_WT_T	39442.7	34348.9	-0.199496	39442.7	34348.9	-0.199494	-0.166891	0.8052	0.0940962	0.999503	protein_coding	chr1	212565334-212620777	+	ENSG00000162772.17
XLOC_033787	XLOC_033787	ATF4,MIEF1	89.1442	0.891442	chr22:39500099-39522686	TKS4_WT	TKS4_WT_T	409798	775109	0.919488	409798	775109	0.919486	0.815169	0.24855	0.604586	0.999503	protein_coding,protein_coding
XLOC_025184	XLOC_025184	ATF5,MIR4751	14.6481	0.146481	chr19:49889653-49933936	TKS4_WT	TKS4_WT_T	10421.8	11948.4	0.197209	10421.8	11948.4	0.197213	0.0694714	0.89425	0.0485411	0.999503	protein_coding,miRNA
XLOC_001705	XLOC_001705	ATF6	6.22598	0.0622598	chr1:161766319-161964070	TKS4_WT	TKS4_WT_T	83161.2	88338.8	0.0871373	83161.2	88338.8	0.0871367	0.0954525	0.8952	0.0480799	0.999503	protein_coding	chr1	161766298-161977574	+	ENSG00000118217.7
XLOC_044919	XLOC_044919	ATF6B	22.6645	0.226645	chr6:32115263-32128246	TKS4_WT	TKS4_WT_T	25949	31830.2	0.294717	25949	31830.2	0.294717	0.29669	0.67885	0.168226	0.999503	protein_coding	chr6	32115264-32128253	-	ENSG00000213676.13
XLOC_011894	XLOC_011894	ATF7,ATF7-NPFF,NPFF	-31.0578	-0.310578	chr12:53506687-53626382	TKS4_WT	TKS4_WT_T	39376.3	27146.9	-0.536536	39376.3	27146.9	-0.53654	-0.540482	0.4965	0.304081	0.999503	protein_coding,protein_coding,protein_coding
XLOC_010322	XLOC_010322	ATF7IP	5.34815	0.0534815	chr12:14365639-14502935	TKS4_WT	TKS4_WT_T	83780.4	88261.1	0.0751638	83780.4	88261.1	0.075165	0.0834957	0.91055	0.0406962	0.999503	protein_coding	chr12	14365676-14502931	+	ENSG00000171681.13
XLOC_018585	XLOC_018585	ATF7IP2	27.4331	0.274331	chr16:10386060-10483643	TKS4_WT	TKS4_WT_T	9277.34	11822.4	0.349738	9277.34	11822.4	0.34974	0.345167	0.6675	0.175549	0.999503	protein_coding	chr16	10326434-10483638	+	ENSG00000166669.14
XLOC_040835	XLOC_040835	ATG10	-24.8639	-0.248639	chr5:81972020-82258502	TKS4_WT	TKS4_WT_T	10177.3	7646.83	-0.412414	10177.3	7646.83	-0.412421	-0.387522	0.66155	0.179437	0.999503	protein_coding	chr5	81972023-82276857	+	ENSG00000152348.16
XLOC_010586	XLOC_010586	ATG101	30.6244	0.306244	chr12:52069922-52077495	TKS4_WT	TKS4_WT_T	38826.2	50716.5	0.385425	38826.2	50716.5	0.385425	0.41155	0.56	0.251812	0.999503	protein_coding	chr12	52069246-52077495	+	ENSG00000123395.15
XLOC_042270	XLOC_042270	ATG12	26.5949	0.265949	chr5:115828199-115841565	TKS4_WT	TKS4_WT_T	243295	307999	0.340215	243295	307999	0.340219	0.334443	0.63565	0.196782	0.999503	protein_coding	chr5	115828200-115841837	-	ENSG00000145782.13
XLOC_007552	XLOC_007552	ATG13	55.219	0.55219	chr11:46602860-46676018	TKS4_WT	TKS4_WT_T	52427.8	81377.9	0.634306	52427.8	81377.9	0.634305	0.631055	0.4526	0.344285	0.999503	protein_coding	chr11	46617527-46674818	+	ENSG00000175224.17
XLOC_015381	XLOC_015381	ATG14,HMGN1P1	16.475	0.16475	chr14:55366390-55411830	TKS4_WT	TKS4_WT_T	26526.9	30897.2	0.220019	26526.9	30897.2	0.22002	0.228421	0.74855	0.125779	0.999503	protein_coding,processed_pseudogene
XLOC_029338	XLOC_029338	ATG16L1	3.4432	0.034432	chr2:233251646-233295674	TKS4_WT	TKS4_WT_T	47630.1	49270.1	0.0488377	47630.1	49270.1	0.0488388	0.0364939	0.9597	0.0178645	0.999503	protein_coding	chr2	233210051-233295674	+	ENSG00000085978.22
XLOC_008012	XLOC_008012	ATG16L2	37.9452	0.379452	chr11:72814406-73142682	TKS4_WT	TKS4_WT_T	6529.04	9006.5	0.464095	6529.04	9006.5	0.464096	0.247415	0.6378	0.195315	0.999503	protein_coding	chr11	72814406-72843674	+	ENSG00000168010.11
XLOC_009289	XLOC_009289	ATG2A	-17.8118	-0.178118	chr11:64894545-64917241	TKS4_WT	TKS4_WT_T	24409.1	20061.4	-0.282995	24409.1	20061.4	-0.282997	-0.240316	0.72675	0.138615	0.999503	protein_coding	chr11	64894546-64917211	-	ENSG00000110046.13
XLOC_015719	XLOC_015719	ATG2B	-51.5262	-0.515262	chr14:96279194-96363341	TKS4_WT	TKS4_WT_T	23831.2	11551.9	-1.04472	23831.2	11551.9	-1.04472	-1.04271	0.1342	0.872247	0.999503	protein_coding	chr14	96279195-96363341	-	ENSG00000066739.12
XLOC_036917	XLOC_036917	ATG3	-12.0885	-0.120885	chr3:112532509-112585579	TKS4_WT	TKS4_WT_T	70587.9	62054.9	-0.185874	70587.9	62054.9	-0.185876	-0.129145	0.86275	0.064115	0.999503	protein_coding	chr3	112532510-112562046	-	ENSG00000144848.11
XLOC_056291	XLOC_056291	ATG4A	8.12027	0.0812027	chrX:108091777-108154671	TKS4_WT	TKS4_WT_T	11620.3	12563.9	0.112636	11620.3	12563.9	0.112637	0.102288	0.8815	0.0547777	0.999503	protein_coding	chrX	108091668-108154671	+	ENSG00000101844.18
XLOC_029421	XLOC_029421	ATG4B	1.88784	0.0188784	chr2:241637658-241673857	TKS4_WT	TKS4_WT_T	38726.7	39457.8	0.0269821	38726.7	39457.8	0.0269819	0.0276328	0.96975	0.0133402	0.999503	protein_coding	chr2	241637213-241673857	+	ENSG00000168397.17
XLOC_000821	XLOC_000821	ATG4C	5.39143	0.0539143	chr1:62783764-62865516	TKS4_WT	TKS4_WT_T	15546.9	16385.1	0.0757625	15546.9	16385.1	0.0757575	0.0753482	0.9139	0.0391013	0.999503	protein_coding	chr1	62784132-62865516	+	ENSG00000125703.15
XLOC_024449	XLOC_024449	ATG4D	-1.64392	-0.0164392	chr19:10543896-10566031	TKS4_WT	TKS4_WT_T	29891.9	29400.5	-0.0239164	29891.9	29400.5	-0.0239139	-0.0179617	0.98525	0.00645356	0.999503	protein_coding	chr19	10543895-10553418	+	ENSG00000130734.10
XLOC_045432	XLOC_045432	ATG5	-0.479931	-0.00479931	chr6:106184475-106325789	TKS4_WT	TKS4_WT_T	69635	69300.8	-0.00694156	69635	69300.8	-0.00694061	-0.00706054	0.99125	0.0038168	0.999503	protein_coding	chr6	106045423-106325791	-	ENSG00000057663.16
XLOC_034790	XLOC_034790	ATG7	10.0713	0.100713	chr3:11272347-11720715	TKS4_WT	TKS4_WT_T	30098.3	33129.6	0.138436	30098.3	33129.6	0.138439	0.105038	0.89915	0.0461679	0.999503	protein_coding	chr3	11272309-11557665	+	ENSG00000197548.13
XLOC_031126	XLOC_031126	ATG9A	17.3538	0.173538	chr2:219219379-219229636	TKS4_WT	TKS4_WT_T	58316.8	68437	0.230866	58316.8	68437	0.230865	0.232552	0.734	0.134304	0.999503	protein_coding	chr2	219219380-219229717	-	ENSG00000198925.12
XLOC_050516	XLOC_050516	ATG9B	19.4575	0.194575	chr7:150991016-151028267	TKS4_WT	TKS4_WT_T	521.599	623.089	0.256498	521.599	623.089	0.256497	0.0514951	0.85165	0.0697388	0.999503	protein_coding	chr7	151012209-151024499	-	ENSG00000181652.20
XLOC_029162	XLOC_029162	ATIC	13.0019	0.130019	chr2:215311973-215359745	TKS4_WT	TKS4_WT_T	89235.7	100838	0.176349	89235.7	100838	0.176347	0.188747	0.7773	0.109411	0.999503	protein_coding	chr2	215311956-215349773	+	ENSG00000138363.15
XLOC_014419	XLOC_014419	ATL1	39.6764	0.396764	chr14:50418474-50633068	TKS4_WT	TKS4_WT_T	1724.4	2408.58	0.482087	1724.4	2408.58	0.482088	0.105093	0.7377	0.13212	0.999503	protein_coding	chr14	50532509-50634017	+	ENSG00000198513.14
XLOC_029725	XLOC_029725	ATL2	6.06133	0.0606133	chr2:38293953-38378584	TKS4_WT	TKS4_WT_T	133766	141874	0.0848912	133766	141874	0.0848988	0.0882932	0.9031	0.0442642	0.999503	protein_coding	chr2	38293954-38377285	-	ENSG00000119787.14
XLOC_009265	XLOC_009265	ATL3	8.01709	0.0801709	chr11:63574461-63671974	TKS4_WT	TKS4_WT_T	114705	123901	0.111254	114705	123901	0.11126	0.113929	0.8739	0.0585383	0.999503	protein_coding	chr11	63624087-63671921	-	ENSG00000184743.13
XLOC_008270	XLOC_008270	ATM	-14.0768	-0.140768	chr11:108155279-108469832	TKS4_WT	TKS4_WT_T	104462	89757.1	-0.218877	104462	89757.1	-0.21888	-0.171519	0.855	0.0680339	0.999503	protein_coding	chr11	108223044-108369102	+	ENSG00000149311.20
XLOC_019241	XLOC_019241	ATMIN	13.5071	0.135071	chr16:81007213-81047350	TKS4_WT	TKS4_WT_T	142495	161742	0.182786	142495	161742	0.182783	0.132268	0.83755	0.0769893	0.999503	protein_coding	chr16	81035842-81047350	+	ENSG00000166454.10
XLOC_010206	XLOC_010206	ATN1	-27.9223	-0.279223	chr12:6924458-6942321	TKS4_WT	TKS4_WT_T	71841.1	51781.4	-0.472376	71841.1	51781.4	-0.472375	-0.411984	0.56805	0.245613	0.999503	protein_coding	chr12	6924463-6942321	+	ENSG00000111676.15
XLOC_038456	XLOC_038456	ATOH1	-0.291398	-0.00291398	chr4:93828752-93830964	TKS4_WT	TKS4_WT_T	84.1803	83.935	-0.00421001	84.1803	83.935	-0.00421013	-0.00169527	0.8605	0.0652491	0.999503	protein_coding	chr4	93828753-93830964	+	ENSG00000172238.6
XLOC_006529	XLOC_006529	ATOH7	-44.1738	-0.441738	chr10:68230594-68232113	TKS4_WT	TKS4_WT_T	300.701	167.87	-0.840984	300.701	167.87	-0.840985	-0.388519	0.614	0.211832	0.999503	protein_coding	chr10	68230595-68232113	-	ENSG00000179774.9
XLOC_028233	XLOC_028233	ATOH8	228.62	2.2862	chr2:85753785-85791383	TKS4_WT	TKS4_WT_T	730.756	2401.41	1.71642	730.756	2401.41	1.71642	1.12503	0.1592	0.798057	0.999503	protein_coding	chr2	85751344-85791383	+	ENSG00000168874.13
XLOC_042563	XLOC_042563	ATOX1	-14.5904	-0.145904	chr5:151742821-151758631	TKS4_WT	TKS4_WT_T	11610.3	9916.31	-0.227531	11610.3	9916.31	-0.22753	-0.196123	0.7834	0.106016	0.999503	protein_coding	chr5	151742316-151772532	-	ENSG00000177556.12
XLOC_017225	XLOC_017225	ATP10A	56802.4	568.024	chr15:25672240-25865144	TKS4_WT	TKS4_WT_T	0	56.9024		0.1	56.9024	9.15235	0	1	0	1	protein_coding	chr15	25677273-25865184	-	ENSG00000206190.13
XLOC_038145	XLOC_038145	ATP10D	-11.4957	-0.114957	chr4:47485260-47593486	TKS4_WT	TKS4_WT_T	14182.7	12552.3	-0.176183	14182.7	12552.3	-0.17618	-0.179708	0.81325	0.0897759	0.999503	protein_coding	chr4	47485275-47593486	+	ENSG00000145246.14
XLOC_013350	XLOC_013350	ATP11A	-31.8084	-0.318084	chr13:112690033-112887168	TKS4_WT	TKS4_WT_T	124494	84894.5	-0.552331	124494	84894.5	-0.552333	-0.5398	0.56275	0.249684	0.999503	protein_coding	chr13	112690038-112887168	+	ENSG00000068650.19
XLOC_036012	XLOC_036012	ATP11B	-33.364	-0.33364	chr3:182793503-182923010	TKS4_WT	TKS4_WT_T	90409	60244.9	-0.585627	90409	60244.9	-0.585627	-0.653249	0.3857	0.41375	0.999503	protein_coding	chr3	182793503-182921629	+	ENSG00000058063.16
XLOC_057567	XLOC_057567	ATP11C	-19.6402	-0.196402	chrX:139726345-139933083	TKS4_WT	TKS4_WT_T	54319.8	43651.3	-0.315454	54319.8	43651.3	-0.315454	-0.344369	0.6709	0.173342	0.999503	protein_coding	chrX	139726346-139945276	-	ENSG00000101974.15
XLOC_012805	XLOC_012805	ATP12A	12.2988	0.122988	chr13:24680407-24712472	TKS4_WT	TKS4_WT_T	329.358	369.865	0.167346	329.358	369.865	0.167342	0.0873965	0.8131	0.089856	0.999503	protein_coding	chr13	24680408-24712472	+	ENSG00000075673.12
XLOC_025885	XLOC_025885	ATP13A1	-28.3899	-0.283899	chr19:19645197-19663676	TKS4_WT	TKS4_WT_T	41764.5	29907.6	-0.481768	41764.5	29907.6	-0.481765	-0.476127	0.4616	0.335734	0.999503	protein_coding	chr19	19645198-19663676	-	ENSG00000105726.17
XLOC_002730	XLOC_002730	ATP13A2	2.81715	0.0281715	chr1:16985957-17011972	TKS4_WT	TKS4_WT_T	34478.1	35449.4	0.0400823	34478.1	35449.4	0.0400809	0.0344387	0.95605	0.0195194	0.999503	protein_coding	chr1	16985958-17011928	-	ENSG00000159363.19
XLOC_037561	XLOC_037561	ATP13A3	-2.76883	-0.0276883	chr3:194402673-194487006	TKS4_WT	TKS4_WT_T	312840	304178	-0.0405096	312840	304178	-0.0405092	-0.0410177	0.95375	0.0205654	0.999503	protein_coding	chr3	194402672-194498364	-	ENSG00000133657.17
XLOC_037542	XLOC_037542	ATP13A4	-40.8063	-0.408063	chr3:193398966-193593114	TKS4_WT	TKS4_WT_T	93.7326	55.4838	-0.756484	93.7326	55.4838	-0.756484	0	1	0	1	protein_coding	chr3	193398967-193593111	-	ENSG00000127249.15
XLOC_001241	XLOC_001241	ATP1A1	-15.0618	-0.150618	chr1:116372985-116418622	TKS4_WT	TKS4_WT_T	304977	259042	-0.235514	304977	259042	-0.235514	-0.2307	0.75375	0.122773	0.999503	protein_coding	chr1	116372668-116410261	+	ENSG00000163399.16
XLOC_001650	XLOC_001650	ATP1A2	56802.4	568.024	chr1:160115758-160143591	TKS4_WT	TKS4_WT_T	0	56.9024		0.1	56.9024	9.15235	0	1	0	1	protein_coding	chr1	160115759-160143591	+	ENSG00000018625.15
XLOC_026170	XLOC_026170	ATP1A3	-49.1808	-0.491808	chr19:41966581-41994230	TKS4_WT	TKS4_WT_T	32794.5	16665.9	-0.976556	32794.5	16665.9	-0.976555	-0.882807	0.2509	0.600499	0.999503	protein_coding	chr19	41966582-41997497	-	ENSG00000105409.19
XLOC_001783	XLOC_001783	ATP1B1	-22.2542	-0.222542	chr1:169106689-169367797	TKS4_WT	TKS4_WT_T	97153.6	75532.8	-0.363165	97153.6	75532.8	-0.363164	-0.348873	0.606	0.217527	0.999503	protein_coding	chr1	169105697-169310992	+	ENSG00000143153.14
XLOC_020631	XLOC_020631	ATP1B2	-99.6799	-0.996799	chr17:7646626-7657770	TKS4_WT	TKS4_WT_T	31.2442	0		31.2442	0.1	-8.28744	0	1	0	1	protein_coding	chr17	7646627-7657770	+	ENSG00000129244.9
XLOC_035767	XLOC_035767	ATP1B3	38.9908	0.389908	chr3:141876642-141926549	TKS4_WT	TKS4_WT_T	106974	148684	0.474995	106974	148684	0.474989	0.497459	0.46795	0.329801	0.999503	protein_coding	chr3	141876124-141926549	+	ENSG00000069849.11
XLOC_056384	XLOC_056384	ATP1B4	28351.2	283.512	chrX:120362084-120383237	TKS4_WT	TKS4_WT_T	0	28.4512		0.1	28.4512	8.15235	0	1	0	1	protein_coding	chrX	120362085-120383249	+	ENSG00000101892.12
XLOC_010730	XLOC_010730	ATP23	-9.69112	-0.0969112	chr12:57941566-57959148	TKS4_WT	TKS4_WT_T	6818.2	6157.44	-0.147061	6818.2	6157.44	-0.14706	-0.139627	0.87475	0.058116	0.999503	protein_coding	chr12	57906039-57959148	+	ENSG00000166896.9
XLOC_018764	XLOC_018764	ATP2A1	-36.4767	-0.364767	chr16:28878487-28925238	TKS4_WT	TKS4_WT_T	2783.72	1768.31	-0.654643	2783.72	1768.31	-0.654643	-0.274181	0.72005	0.142637	0.999503	protein_coding	chr16	28878405-28904466	+	ENSG00000196296.14
XLOC_011108	XLOC_011108	ATP2A2	6.83189	0.0683189	chr12:110281246-110351093	TKS4_WT	TKS4_WT_T	370761	396091	0.0953401	370761	396091	0.0953424	0.0878786	0.9198	0.0363066	0.999503	protein_coding	chr12	110280756-110351093	+	ENSG00000174437.18
XLOC_021716	XLOC_021716	ATP2A3	-42.8551	-0.428551	chr17:3923868-3964464	TKS4_WT	TKS4_WT_T	19255.8	11003.7	-0.807305	19255.8	11003.7	-0.807304	-0.574078	0.3996	0.398375	0.999503	protein_coding	chr17	3923870-3964464	-	ENSG00000074370.18
XLOC_012179	XLOC_012179	ATP2B1	7.33741	0.0733741	chr12:89588048-89711952	TKS4_WT	TKS4_WT_T	112015	120234	0.102154	112015	120234	0.102153	0.101892	0.8833	0.0538918	0.999503	protein_coding	chr12	89588049-89709300	-	ENSG00000070961.16
XLOC_036247	XLOC_036247	ATP2B2	27.9335	0.279335	chr3:10324022-10707962	TKS4_WT	TKS4_WT_T	88.9564	113.805	0.35539	88.9564	113.805	0.355394	0.0674113	0.59915	0.222464	0.999503	protein_coding	chr3	10324023-10708007	-	ENSG00000157087.20
XLOC_002042	XLOC_002042	ATP2B4	-11.8886	-0.118886	chr1:203626831-203744733	TKS4_WT	TKS4_WT_T	112836	99421.4	-0.182599	112836	99421.4	-0.182599	-0.193017	0.7843	0.105518	0.999503	protein_coding	chr1	203626787-203744081	+	ENSG00000058668.15
XLOC_035698	XLOC_035698	ATP2C1	-0.905051	-0.00905051	chr3:130748959-131026825	TKS4_WT	TKS4_WT_T	117452	116389	-0.0131123	117452	116389	-0.0131166	-0.0125288	0.98925	0.00469394	0.999503	protein_coding	chr3	130850595-131016712	+	ENSG00000017260.20
XLOC_019268	XLOC_019268	ATP2C2	-42.6141	-0.426141	chr16:84368522-84467361	TKS4_WT	TKS4_WT_T	6430.53	3690.22	-0.80123	6430.53	3690.22	-0.801231	-0.506597	0.5483	0.260982	0.999503	protein_coding	chr16	84368527-84464187	+	ENSG00000064270.13
XLOC_026032	XLOC_026032	ATP4A	-99.6799	-0.996799	chr19:35550030-35563658	TKS4_WT	TKS4_WT_T	31.2442	0		31.2442	0.1	-8.28744	0	1	0	1	protein_coding	chr19	35550031-35563658	-	ENSG00000105675.9
XLOC_023990	XLOC_023990	ATP5F1A	23.0355	0.230355	chr18:46080247-46104227	TKS4_WT	TKS4_WT_T	697229	857839	0.299074	697229	857839	0.299074	0.251772	0.7304	0.136439	0.999503	protein_coding	chr18	46080248-46104334	-	ENSG00000152234.16
XLOC_011960	XLOC_011960	ATP5F1B	23.2474	0.232474	chr12:56638174-56645984	TKS4_WT	TKS4_WT_T	836748	1031270	0.301553	836748	1031270	0.301557	0.257771	0.6836	0.165198	0.999503	protein_coding	chr12	56638175-56645984	-	ENSG00000110955.9
XLOC_005027	XLOC_005027	ATP5F1C	-1.2962	-0.012962	chr10:7788158-7818363	TKS4_WT	TKS4_WT_T	202824	200195	-0.0188254	202824	200195	-0.0188224	-0.017689	0.97895	0.00923949	0.999503	protein_coding	chr10	7788147-7807815	+	ENSG00000165629.20
XLOC_024274	XLOC_024274	ATP5F1D	49.4044	0.494044	chr19:1241750-1244825	TKS4_WT	TKS4_WT_T	76503.1	114299	0.579218	76503.1	114299	0.579223	0.545438	0.433	0.363512	0.999503	protein_coding	chr19	1241746-1244825	+	ENSG00000099624.8
XLOC_032576	XLOC_032576	ATP5F1E,PRELID3B,SLMO2-ATP5E	-1.35723	-0.0135723	chr20:59016025-59042846	TKS4_WT	TKS4_WT_T	259720	256195	-0.0197131	259720	256195	-0.0197148	-0.0166056	0.9803	0.008641	0.999503	protein_coding,protein_coding,-
XLOC_000425	XLOC_000425	ATP5IF1	-27.5277	-0.275277	chr1:28236123-28238100	TKS4_WT	TKS4_WT_T	12575.3	9113.61	-0.464498	12575.3	9113.61	-0.464498	-0.413352	0.5429	0.26528	0.999503	protein_coding	chr1	28236109-28246906	+	ENSG00000130770.18
XLOC_021243	XLOC_021243	ATP5MC1	41.837	0.41837	chr17:48874707-48929056	TKS4_WT	TKS4_WT_T	77596.1	110060	0.504237	77596.1	110060	0.504234	0.262421	0.77195	0.112411	0.999503	protein_coding	chr17	48892765-48895871	+	ENSG00000159199.14
XLOC_011896	XLOC_011896	ATP5MC2	-2.59005	-0.0259005	chr12:53665159-53677546	TKS4_WT	TKS4_WT_T	92677.7	90277.3	-0.0378584	92677.7	90277.3	-0.037859	-0.0397816	0.9521	0.0213174	0.999503	protein_coding	chr12	53632726-53677408	-	ENSG00000135390.21
XLOC_030815	XLOC_030815	ATP5MC3	2.5184	0.025184	chr2:175176257-175181710	TKS4_WT	TKS4_WT_T	101612	104171	0.0358745	101612	104171	0.0358829	0.0382981	0.95525	0.019883	0.999503	protein_coding	chr2	175176258-175181710	-	ENSG00000154518.10
XLOC_039031	XLOC_039031	ATP5ME	-14.2927	-0.142927	chr4:672435-690748	TKS4_WT	TKS4_WT_T	46754.7	40072.2	-0.222511	46754.7	40072.2	-0.22251	-0.163564	0.85835	0.0663356	0.999503	protein_coding	chr4	672436-674330	-	ENSG00000169020.10
XLOC_050096	XLOC_050096	ATP5MF,ATP5MF-PTCD1,PTCD1	-12.3723	-0.123723	chr7:99408640-99466167	TKS4_WT	TKS4_WT_T	163138	142954	-0.190539	163138	142954	-0.190542	-0.129105	0.90085	0.0453475	0.999503	protein_coding,protein_coding,protein_coding
XLOC_008360	XLOC_008360	ATP5MG	-16.297	-0.16297	chr11:118359599-118418815	TKS4_WT	TKS4_WT_T	82173.9	68782	-0.256648	82173.9	68782	-0.256649	-0.1293	0.9144	0.0388638	0.999503	protein_coding	chr11	118401346-118433278	+	ENSG00000167283.9
XLOC_034373	XLOC_034373	ATP5MGL	-77.2349	-0.772349	chr22:42617839-42649392	TKS4_WT	TKS4_WT_T	124.977	28.4512	-2.1351	124.977	28.4512	-2.1351	0	1	0	1	protein_coding	chr22	42639803-42640601	-	ENSG00000249222.1
XLOC_015785	XLOC_015785	ATP5MJ	7.10065	0.0710065	chr14:103912287-103921529	TKS4_WT	TKS4_WT_T	81801	87609.4	0.0989679	81801	87609.4	0.0989672	0.0924789	0.88435	0.0533758	0.999503	protein_coding	chr14	103912288-103928269	-	ENSG00000156411.10
XLOC_006872	XLOC_006872	ATP5MK,MIR1307	8.52597	0.0852597	chr10:103367975-103396505	TKS4_WT	TKS4_WT_T	191333	207646	0.118036	191333	207646	0.11804	0.101054	0.8856	0.0527624	0.999503	protein_coding,miRNA
XLOC_001192	XLOC_001192	ATP5PB,C1orf162	19.7607	0.197607	chr1:111449463-111478512	TKS4_WT	TKS4_WT_T	288684	345730	0.260155	288684	345730	0.260155	0.222957	0.7377	0.13212	0.999503	protein_coding,protein_coding
XLOC_008415	XLOC_008415	ATP5PBP5,JHY	-50.9924	-0.509924	chr11:122882758-122963862	TKS4_WT	TKS4_WT_T	5840.68	2862.38	-1.02892	5840.68	2862.38	-1.02892	-0.901627	0.233	0.632644	0.999503	processed_pseudogene,protein_coding
XLOC_022703	XLOC_022703	ATP5PD	-18.1199	-0.181199	chr17:75032570-75065886	TKS4_WT	TKS4_WT_T	124432	101885	-0.288409	124432	101885	-0.288416	-0.261655	0.71605	0.145057	0.999503	protein_coding	chr17	75038863-75046985	-	ENSG00000167863.12
XLOC_033147	XLOC_033147	ATP5PF	-16.8558	-0.168558	chr21:25724499-25772460	TKS4_WT	TKS4_WT_T	34375.2	28581	-0.266311	34375.2	28581	-0.266312	-0.163357	0.79835	0.0978067	0.999503	protein_coding	chr21	25716503-25735673	-	ENSG00000154723.13
XLOC_033244	XLOC_033244	ATP5PO	13.0798	0.130798	chr21:33903452-33915804	TKS4_WT	TKS4_WT_T	95399.9	107878	0.177338	95399.9	107878	0.177341	0.181217	0.8014	0.0961507	0.999503	protein_coding	chr21	33903453-33915814	-	ENSG00000241837.7
XLOC_056635	XLOC_056635	ATP6AP1	24.6743	0.246743	chrX:154428668-154436516	TKS4_WT	TKS4_WT_T	64361.3	80242	0.318165	64361.3	80242	0.318164	0.347006	0.61495	0.21116	0.999503	protein_coding	chrX	154428633-154436516	+	ENSG00000071553.18
XLOC_055790	XLOC_055790	ATP6AP2	25.3294	0.253294	chrX:40580969-40606848	TKS4_WT	TKS4_WT_T	62366.6	78163.7	0.325724	62366.6	78163.7	0.325725	0.343413	0.60465	0.218496	0.999503	protein_coding	chrX	40579372-40606848	+	ENSG00000182220.15
XLOC_021112	XLOC_021112	ATP6V0A1,MIR5010	61.4583	0.614583	chr17:42458873-42522611	TKS4_WT	TKS4_WT_T	41653.3	67252.7	0.691162	41653.3	67252.7	0.691161	0.761207	0.2885	0.539854	0.999503	protein_coding,miRNA
XLOC_011250	XLOC_011250	ATP6V0A2	-17.394	-0.17394	chr12:123712352-123761755	TKS4_WT	TKS4_WT_T	40851.5	33745.8	-0.275681	40851.5	33745.8	-0.275681	-0.286606	0.70355	0.152705	0.999503	protein_coding	chr12	123712353-123761755	+	ENSG00000185344.15
XLOC_050387	XLOC_050387	ATP6V0A4	70.1414	0.701414	chr7:138706293-138806759	TKS4_WT	TKS4_WT_T	389.657	662.968	0.766734	389.657	662.968	0.766735	0.493907	0.3519	0.453581	0.999503	protein_coding	chr7	138706294-138799560	-	ENSG00000105929.16
XLOC_000626	XLOC_000626	ATP6V0B	45.8925	0.458925	chr1:43974959-43978295	TKS4_WT	TKS4_WT_T	84292.9	122977	0.544899	84292.9	122977	0.544905	0.571641	0.44305	0.353547	0.999503	protein_coding	chr1	43974487-43978295	+	ENSG00000117410.14
XLOC_018490	XLOC_018490	ATP6V0C	-28.9202	-0.289202	chr16:2513725-2520218	TKS4_WT	TKS4_WT_T	51109.9	36328.8	-0.49249	51109.9	36328.8	-0.492489	-0.439703	0.5386	0.268734	0.999503	protein_coding	chr16	2513952-2520218	+	ENSG00000185883.12
XLOC_020050	XLOC_020050	ATP6V0D1	-9.9084	-0.099084	chr16:67438018-67481157	TKS4_WT	TKS4_WT_T	27020.5	24343.2	-0.150534	27020.5	24343.2	-0.150536	-0.146213	0.83575	0.0779236	0.999503	protein_coding	chr16	67438014-67481181	-	ENSG00000159720.13
XLOC_041424	XLOC_041424	ATP6V0E1	11.566	0.11566	chr5:172983770-173035445	TKS4_WT	TKS4_WT_T	71342.5	79594	0.157899	71342.5	79594	0.157898	0.147548	0.82755	0.0822058	0.999503	protein_coding	chr5	172983771-173035445	+	ENSG00000113732.9
XLOC_049250	XLOC_049250	ATP6V0E2	38.6398	0.386398	chr7:149867693-149880713	TKS4_WT	TKS4_WT_T	26679	36987.7	0.471341	26679	36987.7	0.471341	0.475343	0.49355	0.306669	0.999503	protein_coding	chr7	149872968-149891204	+	ENSG00000171130.19
XLOC_035520	XLOC_035520	ATP6V1A	-6.21693	-0.0621693	chr3:113747034-113812056	TKS4_WT	TKS4_WT_T	137222	128691	-0.0926009	137222	128691	-0.0926006	-0.0948838	0.89615	0.0476193	0.999503	protein_coding	chr3	113747033-113812056	+	ENSG00000114573.10
XLOC_028112	XLOC_028112	ATP6V1B1	-68.0167	-0.680167	chr2:70935899-70965431	TKS4_WT	TKS4_WT_T	88.9564	28.4512	-1.64461	88.9564	28.4512	-1.64461	-0.431395	0.34555	0.461489	0.999503	protein_coding	chr2	70935900-70965431	+	ENSG00000116039.13
XLOC_050900	XLOC_050900	ATP6V1B2	20.8197	0.208197	chr8:20197374-20226852	TKS4_WT	TKS4_WT_T	85113.6	102834	0.272853	85113.6	102834	0.272856	0.297833	0.6698	0.174055	0.999503	protein_coding	chr8	20197381-20226819	+	ENSG00000147416.11
XLOC_051485	XLOC_051485	ATP6V1C1	-14.3609	-0.143609	chr8:103021082-103073051	TKS4_WT	TKS4_WT_T	150541	128922	-0.223654	150541	128922	-0.223658	-0.23166	0.7442	0.12831	0.999503	protein_coding	chr8	103021063-103073051	+	ENSG00000155097.12
XLOC_027669	XLOC_027669	ATP6V1C2	96.5996	0.965996	chr2:10720972-10837712	TKS4_WT	TKS4_WT_T	1678.03	3299	0.975258	1678.03	3299	0.97526	0.127147	0.5418	0.266161	0.999503	protein_coding	chr2	10721100-10785110	+	ENSG00000143882.12
XLOC_015467	XLOC_015467	ATP6V1D	-5.35672	-0.0535672	chr14:67337871-67359804	TKS4_WT	TKS4_WT_T	37918.7	35887.5	-0.0794283	37918.7	35887.5	-0.0794281	-0.0740731	0.91625	0.037986	0.999503	protein_coding	chr14	67294371-67360265	-	ENSG00000100554.12
XLOC_033975	XLOC_033975	ATP6V1E1	2.27157	0.0227157	chr22:17562469-17628822	TKS4_WT	TKS4_WT_T	97065	99269.9	0.0324045	97065	99269.9	0.0324052	0.0328514	0.96165	0.016983	0.999503	protein_coding	chr22	17592136-17628749	-	ENSG00000131100.13
XLOC_029795	XLOC_029795	ATP6V1E2	-10.9784	-0.109784	chr2:46511846-46617057	TKS4_WT	TKS4_WT_T	10675.4	9503.41	-0.167769	10675.4	9503.41	-0.167773	-0.0607752	0.8896	0.0508052	0.999503	protein_coding	chr2	46490750-46542577	-	ENSG00000250565.7
XLOC_049014	XLOC_049014	ATP6V1F	32.8752	0.328752	chr7:128862855-128865847	TKS4_WT	TKS4_WT_T	63307.6	84120.1	0.410074	63307.6	84120.1	0.410072	0.416546	0.54145	0.266442	0.999503	protein_coding	chr7	128862856-128865847	+	ENSG00000128524.5
XLOC_049015	XLOC_049015	ATP6V1FNB	228.131	2.28131	chr7:128866329-128910719	TKS4_WT	TKS4_WT_T	507.27	1664.51	1.71427	507.27	1664.51	1.71427	0.917209	0.21515	0.667259	0.999503	protein_coding	chr7	128866330-128872047	+	ENSG00000272899.4
XLOC_053994	XLOC_053994	ATP6V1G1	4.58495	0.0458495	chr9:114587768-114598879	TKS4_WT	TKS4_WT_T	62268.9	65123.9	0.064674	62268.9	65123.9	0.0646753	0.0568945	0.9373	0.0281214	0.999503	protein_coding	chr9	114587706-114598915	+	ENSG00000136888.8
XLOC_044886	XLOC_044886	ATP6V1G2,ATP6V1G2-DDX39B,DDX39B	21.7763	0.217763	chr6:31528961-31546848	TKS4_WT	TKS4_WT_T	198335	241525	0.284233	198335	241525	0.284233	0.263652	0.7199	0.142728	0.999503	protein_coding,protein_coding,protein_coding
XLOC_052190	XLOC_052190	ATP6V1H	-16.1437	-0.161437	chr8:53715542-53843245	TKS4_WT	TKS4_WT_T	29326.6	24592.2	-0.25401	29326.6	24592.2	-0.254009	-0.26737	0.69725	0.156611	0.999503	protein_coding	chr8	53715543-53843558	-	ENSG00000047249.18
XLOC_056127	XLOC_056127	ATP7A	12.1368	0.121368	chrX:77910692-78050395	TKS4_WT	TKS4_WT_T	20664.4	23172.4	0.16526	20664.4	23172.4	0.16526	0.172987	0.8148	0.088949	0.999503	protein_coding	chrX	77910690-78050395	+	ENSG00000165240.22
XLOC_013714	XLOC_013714	ATP7B	-25.5491	-0.255491	chr13:51932668-52012130	TKS4_WT	TKS4_WT_T	10981.6	8175.9	-0.425644	10981.6	8175.9	-0.425639	-0.349145	0.65715	0.182335	0.999503	protein_coding	chr13	51930436-52012125	-	ENSG00000123191.16
XLOC_039308	XLOC_039308	ATP8A1	-40.5025	-0.405025	chr4:42408372-42657105	TKS4_WT	TKS4_WT_T	2988.9	1778.32	-0.749099	2988.9	1778.32	-0.7491	-0.664686	0.2671	0.573326	0.999503	protein_coding	chr4	42408373-42657105	-	ENSG00000124406.16
XLOC_012817	XLOC_012817	ATP8A2	-60.9739	-0.609739	chr13:25371973-26025851	TKS4_WT	TKS4_WT_T	218.709	85.3536	-1.35749	218.709	85.3536	-1.35749	0	1	0	1	protein_coding	chr13	25371974-26025851	+	ENSG00000132932.19
XLOC_024071	XLOC_024071	ATP8B1	-21.5089	-0.215089	chr18:57630330-57803822	TKS4_WT	TKS4_WT_T	21938.8	17220	-0.3494	21938.8	17220	-0.349399	-0.293111	0.6871	0.16298	0.999503	protein_coding	chr18	57646426-57803315	-	ENSG00000081923.15
XLOC_001540	XLOC_001540	ATP8B2	8.45954	0.0845954	chr1:154325524-154351304	TKS4_WT	TKS4_WT_T	51074.9	55395.6	0.117156	51074.9	55395.6	0.117157	0.124137	0.8506	0.0702746	0.999503	protein_coding	chr1	154325525-154351304	+	ENSG00000143515.20
XLOC_025512	XLOC_025512	ATP8B3	-48.7531	-0.487531	chr19:1782067-1812276	TKS4_WT	TKS4_WT_T	8170.06	4186.9	-0.964465	8170.06	4186.9	-0.964464	-0.82788	0.19705	0.705424	0.999503	protein_coding	chr19	1782075-1812276	-	ENSG00000130270.16
XLOC_017476	XLOC_017476	ATP8B4	0.734471	0.00734471	chr15:49858237-50181851	TKS4_WT	TKS4_WT_T	526.774	530.643	0.0105573	526.774	530.643	0.0105574	0.00427736	0.97915	0.00915077	0.999503	protein_coding	chr15	49858238-50182817	-	ENSG00000104043.15
XLOC_032517	XLOC_032517	ATP9A	-2.14443	-0.0214443	chr20:51596513-51768390	TKS4_WT	TKS4_WT_T	34069.7	33339.1	-0.0312732	34069.7	33339.1	-0.0312741	-0.0301718	0.9668	0.0146634	0.999503	protein_coding	chr20	51596514-51768390	-	ENSG00000054793.14
XLOC_023695	XLOC_023695	ATP9B,LOC107985149	-16.9774	-0.169774	chr18:79069284-79378391	TKS4_WT	TKS4_WT_T	13828.4	11480.7	-0.268425	13828.4	11480.7	-0.268424	-0.256433	0.7144	0.146059	0.999503	protein_coding,-
XLOC_003115	XLOC_003115	ATPAF1,NENFP1	30.5185	0.305185	chr1:46632736-46668443	TKS4_WT	TKS4_WT_T	38153.6	49797.5	0.384255	38153.6	49797.5	0.384254	0.384804	0.61735	0.209469	0.999503	protein_coding,processed_pseudogene
XLOC_021917	XLOC_021917	ATPAF2	5.31797	0.0531797	chr17:17972765-18039168	TKS4_WT	TKS4_WT_T	12762.4	13441.1	0.0747565	12762.4	13441.1	0.0747516	0.0697633	0.9243	0.034187	0.999503	protein_coding	chr17	17977409-18039209	-	ENSG00000171953.16
XLOC_041638	XLOC_041638	ATPSCKMT	41.2615	0.412615	chr5:10225506-10249888	TKS4_WT	TKS4_WT_T	13067.4	18459.2	0.498366	13067.4	18459.2	0.498368	0.478979	0.48295	0.316098	0.999503	protein_coding	chr5	10225507-10249897	-	ENSG00000150756.14
XLOC_037178	XLOC_037178	ATR	-14.5047	-0.145047	chr3:142449234-142578793	TKS4_WT	TKS4_WT_T	97365.3	83242.8	-0.226083	97365.3	83242.8	-0.226082	-0.226547	0.76555	0.116026	0.999503	protein_coding	chr3	142449007-142578733	-	ENSG00000175054.16
XLOC_027795	XLOC_027795	ATRAID	4.601	0.04601	chr2:27212359-27217183	TKS4_WT	TKS4_WT_T	62640.7	65522.8	0.0648975	62640.7	65522.8	0.0648967	0.0628497	0.92975	0.0316338	0.999503	protein_coding	chr2	27212041-27217178	+	ENSG00000138085.18
XLOC_035111	XLOC_035111	ATRIP,ATRIP-TREX1,TREX1	-18.5333	-0.185333	chr3:48446709-48467645	TKS4_WT	TKS4_WT_T	37628.4	30654.6	-0.29572	37628.4	30654.6	-0.295718	-0.320906	0.6661	0.176461	0.999503	protein_coding,-,protein_coding
XLOC_031384	XLOC_031384	ATRN	-17.8588	-0.178588	chr20:3471017-3651118	TKS4_WT	TKS4_WT_T	70582.1	57977	-0.28382	70582.1	57977	-0.283822	-0.307891	0.66565	0.176754	0.999503	protein_coding	chr20	3471018-3651118	+	ENSG00000088812.18
XLOC_005879	XLOC_005879	ATRNL1	-30.8396	-0.308396	chr10:115093364-115948999	TKS4_WT	TKS4_WT_T	1038.82	718.452	-0.531982	1038.82	718.452	-0.531982	-0.365382	0.4613	0.336017	0.999503	protein_coding	chr10	115093365-115948999	+	ENSG00000107518.18
XLOC_057173	XLOC_057173	ATRX	-45.9461	-0.459461	chrX:77504877-77786235	TKS4_WT	TKS4_WT_T	108307	58544.2	-0.88753	108307	58544.2	-0.887528	-1.01662	0.21795	0.661643	0.999503	protein_coding	chrX	77504880-77786233	-	ENSG00000085224.23
XLOC_044585	XLOC_044585	ATXN1	-36.9746	-0.369746	chr6:16299111-16766883	TKS4_WT	TKS4_WT_T	29782.1	18770.3	-0.665993	29782.1	18770.3	-0.665994	-0.631302	0.42765	0.368912	0.999503	protein_coding	chr6	16299112-16761491	-	ENSG00000124788.19
XLOC_033875	XLOC_033875	ATXN10	20.2901	0.202901	chr22:45671833-45845307	TKS4_WT	TKS4_WT_T	103686	124724	0.266521	103686	124724	0.266518	0.283315	0.6786	0.168386	0.999503	protein_coding	chr22	45671798-45845307	+	ENSG00000130638.17
XLOC_019182	XLOC_019182	ATXN1L	-2.63008	-0.0263008	chr16:71845975-71857328	TKS4_WT	TKS4_WT_T	57275.8	55769.4	-0.0384519	57275.8	55769.4	-0.038452	-0.0424427	0.9508	0.0219108	0.999503	protein_coding	chr16	71808439-71885268	+	ENSG00000224470.9
XLOC_012356	XLOC_012356	ATXN2	-50.1174	-0.501174	chr12:111452213-111600255	TKS4_WT	TKS4_WT_T	40932.1	20418	-1.00339	40932.1	20418	-1.00339	-1.09682	0.1504	0.822752	0.999503	protein_coding	chr12	111443485-111599676	-	ENSG00000204842.18
XLOC_018762	XLOC_018762	ATXN2L	-33.1982	-0.331982	chr16:28822998-28837237	TKS4_WT	TKS4_WT_T	102430	68425.1	-0.582046	102430	68425.1	-0.582041	-0.566058	0.391	0.407823	0.999503	protein_coding	chr16	28822999-28837237	+	ENSG00000168488.19
XLOC_015674	XLOC_015674	ATXN3	13.2512	0.132512	chr14:92058551-92106582	TKS4_WT	TKS4_WT_T	26002.1	29447.7	0.179525	26002.1	29447.7	0.179527	0.185127	0.79245	0.101028	0.999503	protein_coding	chr14	92044496-92106621	-	ENSG00000066427.25
XLOC_035247	XLOC_035247	ATXN7	-11.0107	-0.110107	chr3:63816945-64003462	TKS4_WT	TKS4_WT_T	43368.9	38593.7	-0.168297	43368.9	38593.7	-0.168295	-0.129735	0.86015	0.0654258	0.999503	protein_coding	chr3	63863155-64003462	+	ENSG00000163635.20
XLOC_050189	XLOC_050189	ATXN7L1	-46.5965	-0.465965	chr7:105604771-106036432	TKS4_WT	TKS4_WT_T	17507.7	9349.73	-0.904993	17507.7	9349.73	-0.904993	-0.852183	0.22205	0.653549	0.999503	protein_coding	chr7	105604772-105876599	-	ENSG00000146776.15
XLOC_001156	XLOC_001156	ATXN7L2	20.8284	0.208284	chr1:109483904-109492804	TKS4_WT	TKS4_WT_T	5811.62	7022.09	0.272959	5811.62	7022.09	0.27296	0.236173	0.7664	0.115545	0.999503	protein_coding	chr1	109483479-109492804	+	ENSG00000162650.17
XLOC_022346	XLOC_022346	ATXN7L3	34.1949	0.341949	chr17:44186971-44223703	TKS4_WT	TKS4_WT_T	68943.4	92518.5	0.424329	68943.4	92518.5	0.424329	0.308637	0.6839	0.165007	0.999503	protein_coding	chr17	44191805-44200113	-	ENSG00000087152.16
XLOC_010846	XLOC_010846	ATXN7L3B	18.1633	0.181633	chr12:74537834-74545430	TKS4_WT	TKS4_WT_T	59677.4	70516.8	0.240782	59677.4	70516.8	0.240782	0.257519	0.70345	0.152767	0.999503	protein_coding	chr12	74537835-74545430	+	ENSG00000253719.4
XLOC_054896	XLOC_054896	AUH	70.113	0.70113	chr9:91213814-91361945	TKS4_WT	TKS4_WT_T	31750.9	54012.4	0.766493	31750.9	54012.4	0.766493	0.789846	0.25295	0.596965	0.999503	protein_coding	chr9	91213815-91361918	-	ENSG00000148090.12
XLOC_002828	XLOC_002828	AUNIP	23.6103	0.236103	chr1:25819953-25859457	TKS4_WT	TKS4_WT_T	26694.3	32996.9	0.3058	26694.3	32996.9	0.305799	0.203779	0.78635	0.104384	0.999503	protein_coding	chr1	25831913-25859458	-	ENSG00000127423.11
XLOC_030037	XLOC_030037	AUP1	9.96296	0.0996296	chr2:74526651-74557551	TKS4_WT	TKS4_WT_T	110419	121420	0.137019	110419	121420	0.137018	0.11578	0.87775	0.0566292	0.999503	protein_coding	chr2	74526645-74529760	-	ENSG00000115307.17
XLOC_032542	XLOC_032542	AURKA	16.7738	0.167738	chr20:56369388-56392308	TKS4_WT	TKS4_WT_T	109343	127684	0.223724	109343	127684	0.223717	0.22913	0.75785	0.120417	0.999503	protein_coding	chr20	56369389-56392337	-	ENSG00000087586.18
XLOC_002521	XLOC_002521	AURKAIP1	30.0704	0.300704	chr1:1373729-1375516	TKS4_WT	TKS4_WT_T	88130	114631	0.379289	88130	114631	0.379292	0.371625	0.59805	0.223263	0.999503	protein_coding	chr1	1373730-1375207	-	ENSG00000175756.14
XLOC_021809	XLOC_021809	AURKB	-10.4013	-0.104013	chr17:8204730-8210767	TKS4_WT	TKS4_WT_T	50434.9	45189	-0.158453	50434.9	45189	-0.158451	-0.162746	0.8277	0.082127	0.999503	protein_coding	chr17	8204733-8210600	-	ENSG00000178999.13
XLOC_025407	XLOC_025407	AURKC	47.385	0.47385	chr19:57230316-57235550	TKS4_WT	TKS4_WT_T	245.177	361.354	0.559587	245.177	361.354	0.559589	0.325294	0.6596	0.180719	0.999503	protein_coding	chr19	57231009-57235548	+	ENSG00000105146.14
XLOC_017307	XLOC_017307	AVEN	31.5929	0.315929	chr15:33310772-34074877	TKS4_WT	TKS4_WT_T	13094.7	17231.7	0.396078	13094.7	17231.7	0.396082	0.404739	0.59415	0.226104	0.999503	protein_coding	chr15	33858782-34075155	-	ENSG00000169857.9
XLOC_011991	XLOC_011991	AVIL,CTDSP2	-6.26886	-0.0626886	chr12:57782786-57846729	TKS4_WT	TKS4_WT_T	88850.3	83280.4	-0.0934009	88850.3	83280.4	-0.0933996	-0.0767342	0.91525	0.0384603	0.999503	protein_coding,protein_coding
XLOC_048255	XLOC_048255	AVL9	-21.8307	-0.218307	chr7:32495488-32719168	TKS4_WT	TKS4_WT_T	129501	101230	-0.355329	129501	101230	-0.355326	-0.383786	0.578	0.238072	0.999503	protein_coding	chr7	32495426-32588726	+	ENSG00000105778.20
XLOC_006802	XLOC_006802	AVPI1	-5.52053	-0.0552053	chr10:97677421-97687432	TKS4_WT	TKS4_WT_T	14688.8	13877.9	-0.0819251	14688.8	13877.9	-0.0819273	-0.0822658	0.89995	0.0457816	0.999503	protein_coding	chr10	97677424-97687241	-	ENSG00000119986.7
XLOC_012022	XLOC_012022	AVPR1A	83835	838.35	chr12:63142758-63151201	TKS4_WT	TKS4_WT_T	0	83.935		0.1	83.935	9.71313		0.06	1.22185	0.999503	protein_coding	chr12	63142759-63151201	-	ENSG00000166148.4
XLOC_056622	XLOC_056622	AVPR2	-59.8699	-0.598699	chrX:153902624-153907166	TKS4_WT	TKS4_WT_T	209.157	83.935	-1.31724	209.157	83.935	-1.31724	-0.606432	0.4225	0.374173	0.999503	protein_coding	chrX	153902531-153907166	+	ENSG00000126895.16
XLOC_001863	XLOC_001863	AXDND1	-27.0284	-0.270284	chr1:179365703-179575987	TKS4_WT	TKS4_WT_T	2060.72	1503.74	-0.4546	2060.72	1503.74	-0.454593	-0.330451	0.4424	0.354185	0.999503	protein_coding	chr1	179365720-179554735	+	ENSG00000162779.22
XLOC_019373	XLOC_019373	AXIN1	-9.7951	-0.097951	chr16:287439-355226	TKS4_WT	TKS4_WT_T	27506.6	24812.3	-0.148725	27506.6	24812.3	-0.148722	-0.1492	0.83575	0.0779236	0.999503	protein_coding	chr16	287440-352723	-	ENSG00000103126.15
XLOC_022626	XLOC_022626	AXIN2	-30.7622	-0.307622	chr17:65528562-65561648	TKS4_WT	TKS4_WT_T	13731.9	9507.67	-0.530371	13731.9	9507.67	-0.530368	-0.510449	0.4944	0.305922	0.999503	protein_coding	chr17	65528563-65561648	-	ENSG00000168646.14
XLOC_024972	XLOC_024972	AXL	14.9281	0.149281	chr19:41219222-41261767	TKS4_WT	TKS4_WT_T	110952	127515	0.200722	110952	127515	0.200731	0.201755	0.76605	0.115743	0.999503	protein_coding	chr19	41219223-41261766	+	ENSG00000167601.12
XLOC_050109	XLOC_050109	AZGP1	274.283	2.74283	chr7:99966729-99976031	TKS4_WT	TKS4_WT_T	156.221	584.708	1.90413	156.221	584.708	1.90413	1.8246	0.17365	0.760325	0.999503	protein_coding	chr7	99966720-99976042	-	ENSG00000160862.13
XLOC_036361	XLOC_036361	AZI2	-13.3447	-0.133447	chr3:28241592-28526358	TKS4_WT	TKS4_WT_T	36816	31903	-0.206644	36816	31903	-0.206641	-0.171073	0.8168	0.0878843	0.999503	protein_coding	chr3	28315003-28349050	-	ENSG00000163512.14
XLOC_052560	XLOC_052560	AZIN1	5.18423	0.0518423	chr8:102826301-102864200	TKS4_WT	TKS4_WT_T	264205	277902	0.0729169	264205	277902	0.0729184	0.0699417	0.92295	0.0348218	0.999503	protein_coding	chr8	102826111-102893864	-	ENSG00000155096.15
XLOC_000484	XLOC_000484	AZIN2	11.6958	0.116958	chr1:33081151-33184774	TKS4_WT	TKS4_WT_T	3556.07	3971.98	0.159574	3556.07	3971.98	0.159575	0.0880117	0.7919	0.10133	0.999503	protein_coding	chr1	33081104-33123492	+	ENSG00000142920.17
XLOC_024257	XLOC_024257	AZU1	56802.4	568.024	chr19:827836-832018	TKS4_WT	TKS4_WT_T	0	56.9024		0.1	56.9024	9.15235	0	1	0	1	protein_coding	chr19	825097-832018	+	ENSG00000172232.10
XLOC_016588	XLOC_016588	B2M,MIR10393	58.7427	0.587427	chr15:44711491-44718877	TKS4_WT	TKS4_WT_T	276412	438784	0.66669	276412	438784	0.666691	0.605966	0.379	0.421361	0.999503	protein_coding,-
XLOC_037322	XLOC_037322	B3GALNT1	51.142	0.51142	chr3:161083882-161105469	TKS4_WT	TKS4_WT_T	18126.6	27396.9	0.595904	18126.6	27396.9	0.595904	0.567619	0.41535	0.381586	0.999503	protein_coding	chr3	161083883-161105411	-	ENSG00000169255.15
XLOC_004815	XLOC_004815	B3GALNT2	-32.5386	-0.325386	chr1:235367426-235504481	TKS4_WT	TKS4_WT_T	66779.2	45050.2	-0.567867	66779.2	45050.2	-0.567865	-0.483413	0.51215	0.290603	0.999503	protein_coding	chr1	235447190-235504452	-	ENSG00000162885.14
XLOC_028834	XLOC_028834	B3GALT1	-46.49	-0.4649	chr2:167293000-167941144	TKS4_WT	TKS4_WT_T	7149.35	3825.62	-0.902117	7149.35	3825.62	-0.902119	-0.740579	0.2816	0.550367	0.999503	protein_coding	chr2	167293001-167874045	+	ENSG00000172318.6
XLOC_004382	XLOC_004382	B3GALT2	-65.9556	-0.659556	chr1:193121266-193254815	TKS4_WT	TKS4_WT_T	158.808	54.0652	-1.55451	158.808	54.0652	-1.55451	0	1	0	1	protein_coding	chr1	193178730-193186613	-	ENSG00000162630.6
XLOC_043507	XLOC_043507	B3GALT4	51.0669	0.510669	chr6:33277122-33289239	TKS4_WT	TKS4_WT_T	868.271	1311.67	0.595189	868.271	1311.67	0.595187	0.0862579	0.7467	0.126854	0.999503	protein_coding	chr6	33277123-33284832	+	ENSG00000235863.4
XLOC_032928	XLOC_032928	B3GALT5	45.4876	0.454876	chr21:39612939-39802096	TKS4_WT	TKS4_WT_T	5273.5	7672.29	0.540895	5273.5	7672.29	0.540896	0.48207	0.4825	0.316503	0.999503	protein_coding	chr21	39556442-39673137	+	ENSG00000183778.19
XLOC_000037	XLOC_000037	B3GALT6	135.538	1.35538	chr1:1232236-1235041	TKS4_WT	TKS4_WT_T	21464	50555.8	1.23596	21464	50555.8	1.23596	1.30916	0.0664	1.17783	0.999503	protein_coding	chr1	1232237-1235041	+	ENSG00000176022.7
XLOC_054024	XLOC_054024	B3GALT9	-9.99759	-0.0999759	chr9:120793466-120801787	TKS4_WT	TKS4_WT_T	12052.9	10847.9	-0.151969	12052.9	10847.9	-0.151965	-0.13662	0.84045	0.0754881	0.999503	protein_coding	chr9	120792403-120801787	+	ENSG00000214654.9
XLOC_009956	XLOC_009956	B3GAT1	-76.5797	-0.765797	chr11:134378503-134412242	TKS4_WT	TKS4_WT_T	115.424	27.0326	-2.09418	115.424	27.0326	-2.09417	-0.751063	0.22415	0.649461	0.999503	protein_coding	chr11	134378504-134412242	-	ENSG00000109956.13
XLOC_045236	XLOC_045236	B3GAT2	97.8789	0.978789	chr6:70667882-70957060	TKS4_WT	TKS4_WT_T	293.337	580.452	0.984616	293.337	580.452	0.984618	0.232176	0.71815	0.143785	0.999503	protein_coding	chr6	70856679-70957060	-	ENSG00000112309.11
XLOC_009230	XLOC_009230	B3GAT3	63.2564	0.632564	chr11:62615295-62621986	TKS4_WT	TKS4_WT_T	33999.9	55507	0.707139	33999.9	55507	0.707139	0.768193	0.2742	0.561933	0.999503	protein_coding	chr11	62615296-62622154	-	ENSG00000149541.10
XLOC_012873	XLOC_012873	B3GLCT	-10.7586	-0.107586	chr13:31199974-31332276	TKS4_WT	TKS4_WT_T	16797.8	14990.6	-0.164215	16797.8	14990.6	-0.164214	-0.162217	0.81785	0.0873263	0.999503	protein_coding	chr13	31199975-31332276	+	ENSG00000187676.8
XLOC_028036	XLOC_028036	B3GNT2	-10.9251	-0.109251	chr2:62196114-62224731	TKS4_WT	TKS4_WT_T	35632.5	31739.6	-0.166912	35632.5	31739.6	-0.16691	-0.181393	0.78185	0.106877	0.999503	protein_coding	chr2	62196115-62224731	+	ENSG00000170340.11
XLOC_024617	XLOC_024617	B3GNT3	-17.2853	-0.172853	chr19:17794827-17813576	TKS4_WT	TKS4_WT_T	13090.3	10827.6	-0.273786	13090.3	10827.6	-0.273785	-0.252459	0.7099	0.148803	0.999503	protein_coding	chr19	17794828-17813576	+	ENSG00000179913.11
XLOC_011230	XLOC_011230	B3GNT4	33.2417	0.332417	chr12:122203708-122228792	TKS4_WT	TKS4_WT_T	5920.48	7888.55	0.414046	5920.48	7888.55	0.414046	0.129109	0.82685	0.0825733	0.999503	protein_coding	chr12	122203681-122208952	+	ENSG00000176383.9
XLOC_036015	XLOC_036015	B3GNT5	-9.19541	-0.0919541	chr3:183176115-183428619	TKS4_WT	TKS4_WT_T	39738.3	36084.2	-0.13916	39738.3	36084.2	-0.139163	-0.14614	0.8331	0.0793029	0.999503	protein_coding	chr3	183253253-183298504	+	ENSG00000176597.12
XLOC_008068	XLOC_008068	B3GNT6	28351.2	283.512	chr11:77034397-77041973	TKS4_WT	TKS4_WT_T	0	28.4512		0.1	28.4512	8.15235	0	1	0	1	protein_coding	chr11	77034398-77041973	+	ENSG00000198488.10
XLOC_029310	XLOC_029310	B3GNT7	1.14275	0.0114275	chr2:231395709-231401164	TKS4_WT	TKS4_WT_T	5419.38	5481.31	0.0163935	5419.38	5481.31	0.0163929	0.0141176	0.98385	0.00707111	0.999503	protein_coding	chr2	231395710-231401164	+	ENSG00000156966.7
XLOC_026155	XLOC_026155	B3GNT8	163.372	1.63372	chr19:41425358-41428730	TKS4_WT	TKS4_WT_T	52.9361	139.419	1.3971	52.9361	139.419	1.3971	0.800306	0.46575	0.331847	0.999503	protein_coding	chr19	41425359-41428730	-	ENSG00000177191.3
XLOC_020038	XLOC_020038	B3GNT9	-5.24471	-0.0524471	chr16:67109880-67150998	TKS4_WT	TKS4_WT_T	2830.09	2681.66	-0.0777186	2830.09	2681.66	-0.0777216	-0.0262113	0.91925	0.0365664	0.999503	protein_coding	chr16	67148104-67150998	-	ENSG00000237172.4
XLOC_022855	XLOC_022855	B3GNTL1	-30.3628	-0.303628	chr17:82752047-83051845	TKS4_WT	TKS4_WT_T	10480.5	7298.33	-0.522076	10480.5	7298.33	-0.522069	-0.170123	0.6333	0.198391	0.999503	protein_coding	chr17	82942149-83051809	-	ENSG00000175711.9
XLOC_011985	XLOC_011985	B4GALNT1	-12.7557	-0.127557	chr12:57618404-57633239	TKS4_WT	TKS4_WT_T	34928.6	30473.2	-0.196869	34928.6	30473.2	-0.196868	-0.202992	0.81365	0.0895624	0.999503	protein_coding	chr12	57623409-57633239	-	ENSG00000135454.14
XLOC_021250	XLOC_021250	B4GALNT2	26932.6	269.326	chr17:49120346-49176840	TKS4_WT	TKS4_WT_T	0	27.0326		0.1	27.0326	8.07856	0	1	0	1	protein_coding	chr17	49132460-49176840	+	ENSG00000167080.9
XLOC_010123	XLOC_010123	B4GALNT3	-34.5816	-0.345816	chr12:459938-563509	TKS4_WT	TKS4_WT_T	10553.4	6903.87	-0.612227	10553.4	6903.87	-0.612231	-0.472239	0.4926	0.307506	0.999503	protein_coding	chr12	459939-563509	+	ENSG00000139044.12
XLOC_007134	XLOC_007134	B4GALNT4	-13.8541	-0.138541	chr11:369498-382117	TKS4_WT	TKS4_WT_T	24312	20943.8	-0.215144	24312	20943.8	-0.215145	-0.190157	0.77115	0.112861	0.999503	protein_coding	chr11	369499-382117	+	ENSG00000182272.12
XLOC_054497	XLOC_054497	B4GALT1	8.72571	0.0872571	chr9:33104076-33179983	TKS4_WT	TKS4_WT_T	51237.1	55707.9	0.120691	51237.1	55707.9	0.120693	0.12841	0.8625	0.0642409	0.999503	protein_coding	chr9	33104082-33167356	-	ENSG00000086062.13
XLOC_000627	XLOC_000627	B4GALT2	7.80898	0.0780898	chr1:43979209-43991171	TKS4_WT	TKS4_WT_T	61716.1	66535.5	0.108479	61716.1	66535.5	0.108477	0.109918	0.87785	0.0565797	0.999503	protein_coding	chr1	43978943-43991170	+	ENSG00000117411.18
XLOC_036953	XLOC_036953	B4GALT4	37.2306	0.372306	chr3:119211741-119290666	TKS4_WT	TKS4_WT_T	13737.1	18851.5	0.4566	13737.1	18851.5	0.456602	0.437831	0.51925	0.284623	0.999503	protein_coding	chr3	119211732-119240946	-	ENSG00000121578.13
XLOC_032493	XLOC_032493	B4GALT5	-14.7267	-0.147267	chr20:49632944-49713878	TKS4_WT	TKS4_WT_T	211493	180347	-0.229833	211493	180347	-0.229834	-0.235868	0.7463	0.127087	0.999503	protein_coding	chr20	49632945-49713878	-	ENSG00000158470.5
XLOC_023918	XLOC_023918	B4GALT6	-26.0408	-0.260408	chr18:31621035-31725686	TKS4_WT	TKS4_WT_T	14611.3	10806.4	-0.435201	14611.3	10806.4	-0.435199	-0.367482	0.6185	0.20866	0.999503	protein_coding	chr18	31622246-31685836	-	ENSG00000118276.12
XLOC_041486	XLOC_041486	B4GALT7	-10.3711	-0.103711	chr5:177600101-177610330	TKS4_WT	TKS4_WT_T	17223.9	15437.6	-0.157967	17223.9	15437.6	-0.157963	-0.152104	0.8329	0.0794071	0.999503	protein_coding	chr5	177600132-177610330	+	ENSG00000027847.14
XLOC_009338	XLOC_009338	B4GAT1	18.615	0.18615	chr11:66345373-66347629	TKS4_WT	TKS4_WT_T	9524.51	11297.5	0.246286	9524.51	11297.5	0.246287	0.227166	0.73965	0.130974	0.999503	protein_coding	chr11	66345374-66347629	-	ENSG00000174684.7
XLOC_021942	XLOC_021942	B9D1	-18.3136	-0.183136	chr17:19237376-19387190	TKS4_WT	TKS4_WT_T	10477.6	8558.77	-0.291827	10477.6	8558.77	-0.291833	-0.135697	0.76565	0.11597	0.999503	protein_coding	chr17	19334308-19378193	-	ENSG00000108641.20
XLOC_026153	XLOC_026153	B9D2	1.46433	0.0146433	chr19:41354416-41384083	TKS4_WT	TKS4_WT_T	2952.88	2996.12	0.0209769	2952.88	2996.12	0.0209727	0.0141072	0.98035	0.00861885	0.999503	protein_coding	chr19	41354417-41364165	-	ENSG00000123810.9
XLOC_055007	XLOC_055007	BAAT	32.8579	0.328579	chr9:101360416-101385006	TKS4_WT	TKS4_WT_T	801.006	1064.2	0.409886	801.006	1064.2	0.409884	0.223283	0.8071	0.0930727	0.999503	protein_coding	chr9	101354182-101385400	-	ENSG00000136881.12
XLOC_024606	XLOC_024606	BABAM1	21.6163	0.216163	chr19:17267442-17279337	TKS4_WT	TKS4_WT_T	49331.8	59995.5	0.282335	49331.8	59995.5	0.282336	0.300916	0.68935	0.16156	0.999503	protein_coding	chr19	17267376-17281249	+	ENSG00000105393.16
XLOC_027812	XLOC_027812	BABAM2	17.6547	0.176547	chr2:27781378-28338901	TKS4_WT	TKS4_WT_T	26999.6	31766.3	0.23456	26999.6	31766.3	0.234559	0.2335	0.74225	0.12945	0.999503	protein_coding	chr2	27889941-28338901	+	ENSG00000158019.21
XLOC_009772	XLOC_009772	BACE1	-63.7471	-0.637471	chr11:117232670-117316256	TKS4_WT	TKS4_WT_T	7989.96	2896.59	-1.46383	7989.96	2896.59	-1.46383	-0.668758	0.4975	0.303207	0.999503	protein_coding	chr11	117285232-117316259	-	ENSG00000186318.18
XLOC_032935	XLOC_032935	BACE2	-0.140936	-0.00140936	chr21:41168159-41282530	TKS4_WT	TKS4_WT_T	24692.1	24657.3	-0.00203103	24692.1	24657.3	-0.00203471	-0.00201189	0.9976	0.00104356	0.999508	protein_coding	chr21	41167801-41282530	+	ENSG00000182240.16
XLOC_032815	XLOC_032815	BACH1	31.0814	0.310814	chr21:29298921-29361894	TKS4_WT	TKS4_WT_T	59258.5	77676.9	0.390463	59258.5	77676.9	0.390464	0.411759	0.5649	0.248028	0.999503	protein_coding	chr21	29194071-29630751	+	ENSG00000156273.16
XLOC_045374	XLOC_045374	BACH2	-21.1838	-0.211838	chr6:89926527-90296843	TKS4_WT	TKS4_WT_T	5756.1	4536.74	-0.343433	5756.1	4536.74	-0.343436	-0.274374	0.71335	0.146697	0.999503	protein_coding	chr6	89926528-90296843	-	ENSG00000112182.16
XLOC_009274	XLOC_009274	BAD	4.04099	0.0404099	chr11:64269827-64289500	TKS4_WT	TKS4_WT_T	27208.7	28308.2	0.057152	27208.7	28308.2	0.057152	0.0534122	0.93715	0.0281909	0.999503	protein_coding	chr11	64269830-64284704	-	ENSG00000002330.14
XLOC_054498	XLOC_054498	BAG1	-10.3693	-0.103693	chr9:33252470-33264708	TKS4_WT	TKS4_WT_T	42329.7	37940.4	-0.157939	42329.7	37940.4	-0.157935	-0.161142	0.82255	0.0848377	0.999503	protein_coding	chr9	33247820-33264720	-	ENSG00000107262.26
XLOC_043759	XLOC_043759	BAG2	8.54705	0.0854705	chr6:57172325-57222307	TKS4_WT	TKS4_WT_T	101497	110172	0.118324	101497	110172	0.118321	0.0952251	0.8957	0.0478374	0.999503	protein_coding	chr6	57172326-57189833	+	ENSG00000112208.11
XLOC_005913	XLOC_005913	BAG3	-18.609	-0.18609	chr10:119651379-119677819	TKS4_WT	TKS4_WT_T	72882.4	59319.7	-0.29706	72882.4	59319.7	-0.297059	-0.306499	0.65825	0.181609	0.999503	protein_coding	chr10	119651380-119677819	+	ENSG00000151929.10
XLOC_051056	XLOC_051056	BAG4	1.34837	0.0134837	chr8:38176854-38213301	TKS4_WT	TKS4_WT_T	91747.9	92985	0.0193225	91747.9	92985	0.0193229	0.0188759	0.9784	0.00948356	0.999503	protein_coding	chr8	38176533-38213301	+	ENSG00000156735.11
XLOC_015780	XLOC_015780	BAG5	30.2288	0.302288	chr14:103556550-103562657	TKS4_WT	TKS4_WT_T	65419	85194.4	0.381049	65419	85194.4	0.381049	0.398451	0.5672	0.246264	0.999503	protein_coding	chr14	103556545-103562657	-	ENSG00000166170.12
XLOC_044893	XLOC_044893	BAG6,C6orf47	-11.4926	-0.114926	chr6:31639027-31660900	TKS4_WT	TKS4_WT_T	179716	159062	-0.176123	179716	159062	-0.17613	-0.167114	0.74385	0.128515	0.999503	protein_coding,protein_coding
XLOC_021610	XLOC_021610	BAHCC1	-61.4153	-0.614153	chr17:81395430-81472520	TKS4_WT	TKS4_WT_T	60480	23336	-1.3739	60480	23336	-1.3739	-1.18891	0.18225	0.739332	0.999503	protein_coding	chr17	81395457-81466332	+	ENSG00000266074.10
XLOC_016527	XLOC_016527	BAHD1	9.54594	0.0954594	chr15:40439756-40468237	TKS4_WT	TKS4_WT_T	37977.4	41602.7	0.131537	37977.4	41602.7	0.131536	0.126776	0.8606	0.0651987	0.999503	protein_coding	chr15	40439721-40468236	+	ENSG00000140320.12
XLOC_021604	XLOC_021604	BAIAP2	-32.5485	-0.325485	chr17:81035130-81183166	TKS4_WT	TKS4_WT_T	53661.4	36195.4	-0.568077	53661.4	36195.4	-0.568078	-0.532186	0.3734	0.427826	0.999503	protein_coding	chr17	81035122-81117434	+	ENSG00000175866.16
XLOC_050084	XLOC_050084	BAIAP2L1	1.03783	0.0103783	chr7:98281672-98401090	TKS4_WT	TKS4_WT_T	67641.3	68343.3	0.0148942	67641.3	68343.3	0.0148955	0.0138855	0.98605	0.00610106	0.999503	protein_coding	chr7	98291650-98401090	-	ENSG00000006453.14
XLOC_034284	XLOC_034284	BAIAP2L2	-42.2755	-0.422755	chr22:38084888-38110944	TKS4_WT	TKS4_WT_T	391.846	226.191	-0.792746	391.846	226.191	-0.792745	-0.307336	0.3323	0.47847	0.999503	protein_coding	chr22	38084652-38111015	-	ENSG00000128298.18
XLOC_018444	XLOC_018444	BAIAP3	-17.0398	-0.170398	chr16:1333644-1351878	TKS4_WT	TKS4_WT_T	10959.1	9091.69	-0.269515	10959.1	9091.69	-0.269509	-0.129658	0.8473	0.0719628	0.999503	protein_coding	chr16	1333638-1349441	+	ENSG00000007516.14
XLOC_044966	XLOC_044966	BAK1	72.5627	0.725627	chr6:33572551-33580296	TKS4_WT	TKS4_WT_T	27929.1	48195.2	0.787117	27929.1	48195.2	0.78712	0.843088	0.2186	0.66035	0.999503	protein_coding	chr6	33572547-33580293	-	ENSG00000030110.14
XLOC_005175	XLOC_005175	BAMBI	60.4231	0.604231	chr10:28677520-28682932	TKS4_WT	TKS4_WT_T	4177.77	6702.11	0.681883	4177.77	6702.11	0.681882	0.595232	0.40155	0.39626	0.999503	protein_coding	chr10	28677510-28682932	+	ENSG00000095739.11
XLOC_007884	XLOC_007884	BANF1	122.482	1.22482	chr11:65996544-66004149	TKS4_WT	TKS4_WT_T	36454.6	81105.1	1.15369	36454.6	81105.1	1.15369	0.679049	0.5341	0.272377	0.999503	protein_coding	chr11	66002228-66004149	+	ENSG00000175334.8
XLOC_038489	XLOC_038489	BANK1	34.991	0.34991	chr4:101790481-102074812	TKS4_WT	TKS4_WT_T	1656.74	2236.45	0.432867	1656.74	2236.45	0.432863	0.307901	0.65885	0.181213	0.999503	protein_coding	chr4	101411286-102074812	+	ENSG00000153064.12
XLOC_019309	XLOC_019309	BANP	10.0782	0.100782	chr16:87949215-88077318	TKS4_WT	TKS4_WT_T	17785.9	19578.4	0.138531	17785.9	19578.4	0.138529	0.14511	0.79135	0.101631	0.999503	protein_coding	chr16	87949244-88077318	+	ENSG00000172530.21
XLOC_036611	XLOC_036611	BAP1	20.9509	0.209509	chr3:52401003-52410030	TKS4_WT	TKS4_WT_T	60558.4	73245.9	0.274421	60558.4	73245.9	0.274421	0.287305	0.6839	0.165007	0.999503	protein_coding	chr3	52401008-52410008	-	ENSG00000163930.10
XLOC_031069	XLOC_031069	BARD1	-18.3891	-0.183891	chr2:214725644-214809683	TKS4_WT	TKS4_WT_T	40196	32804.3	-0.293165	40196	32804.3	-0.293167	-0.312827	0.6424	0.192194	0.999503	protein_coding	chr2	214725646-214809683	-	ENSG00000138376.11
XLOC_054175	XLOC_054175	BARHL1	264.244	2.64244	chr9:132582605-132590252	TKS4_WT	TKS4_WT_T	31.2442	113.805	1.8649	31.2442	113.805	1.8649	0	1	0	1	protein_coding	chr9	132582606-132590252	+	ENSG00000125492.10
XLOC_008509	XLOC_008509	BARX2	3.07803	0.0307803	chr11:129375236-129452279	TKS4_WT	TKS4_WT_T	298.113	307.289	0.0437336	298.113	307.289	0.0437368	0.0235952	0.9489	0.0227796	0.999503	protein_coding	chr11	129375848-129452279	+	ENSG00000043039.7
XLOC_040449	XLOC_040449	BASP1	-99.8741	-0.998741	chr5:17130027-17276834	TKS4_WT	TKS4_WT_T	79.4041	0		79.4041	0.1	-9.63307	0	1	0	1	protein_coding	chr5	17065598-17276843	+	ENSG00000176788.9
XLOC_009294	XLOC_009294	BATF2	80.6008	0.806008	chr11:64987944-64996971	TKS4_WT	TKS4_WT_T	1019.32	1840.9	0.852805	1019.32	1840.9	0.852804	0.617031	0.3683	0.433798	0.999503	protein_coding	chr11	64987945-64997018	-	ENSG00000168062.10
XLOC_004577	XLOC_004577	BATF3	60.2673	0.602673	chr1:212686416-212699943	TKS4_WT	TKS4_WT_T	2037.24	3265.03	0.68048	2037.24	3265.03	0.68048	0.540204	0.4274	0.369165	0.999503	protein_coding	chr1	212686417-212699840	-	ENSG00000123685.9
XLOC_025137	XLOC_025137	BAX	-23.4143	-0.234143	chr19:48954824-48961798	TKS4_WT	TKS4_WT_T	19825.5	15183.5	-0.384857	19825.5	15183.5	-0.384853	-0.337701	0.63535	0.196987	0.999503	protein_coding	chr19	48954815-48961798	+	ENSG00000087088.21
XLOC_015243	XLOC_015243	BAZ1A	1.04612	0.0104612	chr14:34752730-34876463	TKS4_WT	TKS4_WT_T	94855.7	95848	0.015015	94855.7	95848	0.0150139	0.0149192	0.9839	0.00704904	0.999503	protein_coding	chr14	34752731-34875647	-	ENSG00000198604.11
XLOC_049913	XLOC_049913	BAZ1B	-8.42615	-0.0842615	chr7:73440405-73522293	TKS4_WT	TKS4_WT_T	201658	184666	-0.126995	201658	184666	-0.126992	-0.134487	0.84275	0.0743012	0.999503	protein_coding	chr7	73440406-73522293	-	ENSG00000009954.11
XLOC_011959	XLOC_011959	BAZ2A	-30.3877	-0.303877	chr12:56520405-56636816	TKS4_WT	TKS4_WT_T	145595	101352	-0.522588	145595	101352	-0.522586	-0.386483	0.6115	0.213604	0.999503	protein_coding	chr12	56595596-56636816	-	ENSG00000076108.12
XLOC_030697	XLOC_030697	BAZ2B	-3.52053	-0.0352053	chr2:159315311-159712442	TKS4_WT	TKS4_WT_T	32551.9	31405.9	-0.0517065	32551.9	31405.9	-0.0517061	-0.0562723	0.9431	0.0254423	0.999503	protein_coding	chr2	159318979-159616569	-	ENSG00000123636.19
XLOC_026291	XLOC_026291	BBC3	18.8763	0.188763	chr19:47220821-47232998	TKS4_WT	TKS4_WT_T	12897.1	15331.6	0.24946	12897.1	15331.6	0.249462	0.219645	0.76265	0.117675	0.999503	protein_coding	chr19	47220822-47232766	-	ENSG00000105327.18
XLOC_006914	XLOC_006914	BBIP1	6.69589	0.0669589	chr10:110871927-110919366	TKS4_WT	TKS4_WT_T	25139.3	26822.6	0.0935048	25139.3	26822.6	0.0935046	0.0650087	0.92915	0.0319142	0.999503	protein_coding	chr10	110898730-110919201	-	ENSG00000214413.9
XLOC_014629	XLOC_014629	BBOF1	-31.9632	-0.319632	chr14:74019348-74084453	TKS4_WT	TKS4_WT_T	3699.16	2516.79	-0.555611	3699.16	2516.79	-0.555613	-0.211339	0.6133	0.212327	0.999503	protein_coding	chr14	74019349-74082863	+	ENSG00000119636.16
XLOC_007902	XLOC_007902	BBS1	-15.9255	-0.159255	chr11:66510634-66546184	TKS4_WT	TKS4_WT_T	9604.51	8074.94	-0.25026	9604.51	8074.94	-0.25026	-0.15104	0.8298	0.0810266	0.999503	protein_coding	chr11	66510606-66533613	+	ENSG00000174483.20
XLOC_012119	XLOC_012119	BBS10	-25.2523	-0.252523	chr12:76344473-76348415	TKS4_WT	TKS4_WT_T	27696.9	20702.8	-0.4199	27696.9	20702.8	-0.419899	-0.427808	0.54995	0.259677	0.999503	protein_coding	chr12	76344474-76348415	-	ENSG00000179941.9
XLOC_038638	XLOC_038638	BBS12	16.3395	0.163395	chr4:122700436-122744943	TKS4_WT	TKS4_WT_T	5125.05	5962.46	0.218343	5125.05	5962.46	0.218342	0.196792	0.78035	0.107711	0.999503	protein_coding	chr4	122732702-122744942	+	ENSG00000181004.10
XLOC_019963	XLOC_019963	BBS2	-17.0914	-0.170914	chr16:56451523-56520095	TKS4_WT	TKS4_WT_T	18755.1	15549.6	-0.270407	18755.1	15549.6	-0.270405	-0.111142	0.87155	0.0597077	0.999503	protein_coding	chr16	56465640-56582667	-	ENSG00000125124.14
XLOC_016823	XLOC_016823	BBS4	36.1275	0.361275	chr15:72675797-72738476	TKS4_WT	TKS4_WT_T	10420.6	14185.3	0.444948	10420.6	14185.3	0.444958	0.415693	0.56335	0.249222	0.999503	protein_coding	chr15	72686179-72738475	+	ENSG00000140463.14
XLOC_028843	XLOC_028843	BBS5	7.03062	0.0703062	chr2:169479493-169506655	TKS4_WT	TKS4_WT_T	4249.41	4548.17	0.098024	4249.41	4548.17	0.0980236	0.0864444	0.89825	0.0466028	0.999503	protein_coding	chr2	169479480-169506655	+	ENSG00000163093.12
XLOC_039803	XLOC_039803	BBS7	8.67424	0.0867424	chr4:121824328-121870497	TKS4_WT	TKS4_WT_T	29201.4	31734.4	0.120012	29201.4	31734.4	0.12001	0.116876	0.87565	0.0576694	0.999503	protein_coding	chr4	121824329-121870487	-	ENSG00000138686.10
XLOC_048260	XLOC_048260	BBS9	10.4791	0.104791	chr7:33129243-33637238	TKS4_WT	TKS4_WT_T	10775.7	11904.9	0.143778	10775.7	11904.9	0.143774	0.139434	0.8568	0.0671205	0.999503	protein_coding	chr7	33109557-33877180	+	ENSG00000122507.21
XLOC_035479	XLOC_035479	BBX	1.11341	0.0111341	chr3:107522961-107811339	TKS4_WT	TKS4_WT_T	134092	135585	0.0159719	134092	135585	0.0159744	0.0172488	0.9807	0.00846382	0.999503	protein_coding	chr3	107522936-107811339	+	ENSG00000114439.19
XLOC_025041	XLOC_025041	BCAM	-49.1428	-0.491428	chr19:44809058-44821421	TKS4_WT	TKS4_WT_T	18719	9519.96	-0.97548	18719	9519.96	-0.975476	-0.700899	0.3171	0.498804	0.999503	protein_coding	chr19	44809071-44821421	+	ENSG00000187244.12
XLOC_001594	XLOC_001594	BCAN	201.191	2.01191	chr1:156637781-156661409	TKS4_WT	TKS4_WT_T	432.642	1303.08	1.59068	432.642	1303.08	1.59068	0.146715	0.23455	0.629765	0.999503	protein_coding	chr1	156641390-156659532	+	ENSG00000132692.19
XLOC_048879	XLOC_048879	BCAP29,DUS4L,DUS4L-BCAP29	-16.1532	-0.161532	chr7:107168986-107623317	TKS4_WT	TKS4_WT_T	51624.6	43285.6	-0.25417	51624.6	43285.6	-0.254172	-0.171034	0.7998	0.0970186	0.999503	protein_coding,protein_coding,protein_coding
XLOC_057676	XLOC_057676	BCAP31	72.1103	0.721103	chrX:153700491-153724746	TKS4_WT	TKS4_WT_T	87925	151328	0.783336	87925	151328	0.783334	0.848532	0.2195	0.658565	0.999503	protein_coding	chrX	153700492-153724565	-	ENSG00000185825.17
XLOC_020147	XLOC_020147	BCAR1	-22.0137	-0.220137	chr16:75226382-75268007	TKS4_WT	TKS4_WT_T	31045.2	24211	-0.358706	31045.2	24211	-0.358708	-0.31961	0.66065	0.180029	0.999503	protein_coding	chr16	75228181-75268053	-	ENSG00000050820.17
XLOC_003462	XLOC_003462	BCAR3	15.7779	0.157779	chr1:93448066-93847219	TKS4_WT	TKS4_WT_T	24777.7	28687.1	0.211362	24777.7	28687.1	0.21136	0.12843	0.8521	0.0695094	0.999503	protein_coding	chr1	93561741-93847150	-	ENSG00000137936.18
XLOC_032532	XLOC_032532	BCAS1	515.034	5.15034	chr20:53943537-54070594	TKS4_WT	TKS4_WT_T	230.849	1419.8	2.62067	230.849	1419.8	2.62067	1.0345	0.00145	2.83863	0.297212	protein_coding	chr20	53936777-54070594	-	ENSG00000064787.14
XLOC_003631	XLOC_003631	BCAS2	50.6817	0.506817	chr1:114567556-114581615	TKS4_WT	TKS4_WT_T	48307.4	72790.4	0.591506	48307.4	72790.4	0.591504	0.550386	0.4228	0.373865	0.999503	protein_coding	chr1	114567557-114581629	-	ENSG00000116752.6
XLOC_021364	XLOC_021364	BCAS3	40.1768	0.401768	chr17:60677850-61392831	TKS4_WT	TKS4_WT_T	24021.8	33673	0.487246	24021.8	33673	0.487248	0.55004	0.47045	0.327487	0.999503	protein_coding	chr17	60677453-61392838	+	ENSG00000141376.23
XLOC_031840	XLOC_031840	BCAS4	11.5769	0.115769	chr20:50794893-50877736	TKS4_WT	TKS4_WT_T	14617.1	16309.3	0.158038	14617.1	16309.3	0.158038	0.158642	0.83505	0.0782875	0.999503	protein_coding	chr20	50794894-50877177	+	ENSG00000124243.19
XLOC_011619	XLOC_011619	BCAT1	113705	1137.05	chr12:24810023-24949101	TKS4_WT	TKS4_WT_T	0	113.805		0.1	113.805	10.1523	0	1	0	1	protein_coding	chr12	24810024-24949101	-	ENSG00000060982.15
XLOC_026324	XLOC_026324	BCAT2	15.2493	0.152493	chr19:48795063-48811029	TKS4_WT	TKS4_WT_T	30623.1	35292.9	0.204757	30623.1	35292.9	0.204758	0.220047	0.75265	0.123407	0.999503	protein_coding	chr19	48795062-48811029	-	ENSG00000105552.15
XLOC_005968	XLOC_005968	BCCIP	23.6424	0.236424	chr10:125823545-125881292	TKS4_WT	TKS4_WT_T	129839	160536	0.306176	129839	160536	0.306173	0.274507	0.74695	0.126708	0.999503	protein_coding	chr10	125823546-125853695	+	ENSG00000107949.17
XLOC_011817	XLOC_011817	BCDIN3D	-6.81488	-0.0681488	chr12:49791138-49843106	TKS4_WT	TKS4_WT_T	7320.3	6821.43	-0.101828	7320.3	6821.43	-0.101829	-0.0353898	0.9428	0.0255804	0.999503	protein_coding	chr12	49836043-49843106	-	ENSG00000186666.6
XLOC_037341	XLOC_037341	BCHE	56802.4	568.024	chr3:165772903-165837423	TKS4_WT	TKS4_WT_T	0	56.9024		0.1	56.9024	9.15235	0	1	0	1	protein_coding	chr3	165772904-165837462	-	ENSG00000114200.10
XLOC_024976	XLOC_024976	BCKDHA	34.0055	0.340055	chr19:41397817-41425002	TKS4_WT	TKS4_WT_T	17907.1	23996.5	0.422292	17907.1	23996.5	0.422292	0.433664	0.539	0.268411	0.999503	protein_coding	chr19	41397808-41425002	+	ENSG00000248098.12
XLOC_043853	XLOC_043853	BCKDHB	-46.8341	-0.468341	chr6:80106609-80469088	TKS4_WT	TKS4_WT_T	28835.6	15330.7	-0.911427	28835.6	15330.7	-0.911427	-0.933301	0.2409	0.618163	0.999503	protein_coding	chr6	80106647-80346270	+	ENSG00000083123.15
XLOC_018822	XLOC_018822	BCKDK	3.16563	0.0316563	chr16:31108380-31117651	TKS4_WT	TKS4_WT_T	35168.4	36281.7	0.0449626	35168.4	36281.7	0.0449624	0.0454956	0.9486	0.0229169	0.999503	protein_coding	chr16	31106107-31112791	+	ENSG00000103507.14
XLOC_003381	XLOC_003381	BCL10	29.2573	0.292573	chr1:85265775-85278088	TKS4_WT	TKS4_WT_T	36131.2	46702.2	0.370244	36131.2	46702.2	0.370245	0.39978	0.6037	0.219179	0.999503	protein_coding	chr1	85265776-85276632	-	ENSG00000142867.14
XLOC_029876	XLOC_029876	BCL11A	24.7436	0.247436	chr2:60450519-60553654	TKS4_WT	TKS4_WT_T	177.913	221.935	0.318968	177.913	221.935	0.318965	0.123782	0.7072	0.150458	0.999503	protein_coding	chr2	60450520-60554467	-	ENSG00000119866.22
XLOC_015736	XLOC_015736	BCL11B	113.354	1.13354	chr14:99169286-99272197	TKS4_WT	TKS4_WT_T	1947.09	4154.19	1.09325	1947.09	4154.19	1.09325	0.860151	0.22105	0.655509	0.999503	protein_coding	chr14	99169287-99272197	-	ENSG00000127152.18
XLOC_024104	XLOC_024104	BCL2	-9.50572	-0.0950572	chr18:63123345-63320280	TKS4_WT	TKS4_WT_T	3164.62	2863.8	-0.144102	3164.62	2863.8	-0.144102	-0.129413	0.8625	0.0642409	0.999503	protein_coding	chr18	63123346-63320128	-	ENSG00000171791.14
XLOC_017798	XLOC_017798	BCL2A1	28351.2	283.512	chr15:79960891-79971196	TKS4_WT	TKS4_WT_T	0	28.4512		0.1	28.4512	8.15235	0	1	0	1	protein_coding	chr15	79960892-79971196	-	ENSG00000140379.9
XLOC_032288	XLOC_032288	BCL2L1	20.6615	0.206615	chr20:31664451-31723963	TKS4_WT	TKS4_WT_T	175568	211843	0.270969	175568	211843	0.270966	0.257014	0.68505	0.164278	0.999503	protein_coding	chr20	31664452-31723989	-	ENSG00000171552.14
XLOC_017497	XLOC_017497	BCL2L10	-54.4696	-0.544696	chr15:52109262-52112775	TKS4_WT	TKS4_WT_T	62.4884	28.4512	-1.1351	62.4884	28.4512	-1.1351	0	1	0	1	protein_coding	chr15	52109263-52112775	-	ENSG00000137875.4
XLOC_028464	XLOC_028464	BCL2L11	-0.591217	-0.00591217	chr2:111120913-111168445	TKS4_WT	TKS4_WT_T	26335.5	26179.8	-0.00855173	26335.5	26179.8	-0.00855477	-0.00844926	0.9907	0.00405784	0.999503	protein_coding	chr2	111119378-111168445	+	ENSG00000153094.24
XLOC_025171	XLOC_025171	BCL2L12	16.278	0.16278	chr19:49659568-49673916	TKS4_WT	TKS4_WT_T	22813.6	26527.2	0.217578	22813.6	26527.2	0.217578	0.129542	0.87025	0.060356	0.999503	protein_coding	chr19	49665142-49673916	+	ENSG00000126453.10
XLOC_033490	XLOC_033490	BCL2L13	-10.0634	-0.100634	chr22:17628854-17730855	TKS4_WT	TKS4_WT_T	58531.2	52641	-0.153019	58531.2	52641	-0.153019	-0.165048	0.82235	0.0849433	0.999503	protein_coding	chr22	17628855-17730855	+	ENSG00000099968.18
XLOC_010292	XLOC_010292	BCL2L14	-8.93926	-0.0893926	chr12:12049848-12099695	TKS4_WT	TKS4_WT_T	31.2442	28.4512	-0.135099	31.2442	28.4512	-0.135099	0	1	0	1	protein_coding	chr12	12049844-12211084	+	ENSG00000121380.12
XLOC_003622	XLOC_003622	BCL2L15	-0.0360713	-0.000360713	chr1:113812611-113914086	TKS4_WT	TKS4_WT_T	798.419	798.131	-0.000519793	798.419	798.131	-0.000520493	-8.26408e-05	0.98145	0.00813182	0.999503	protein_coding	chr1	113876816-113887581	-	ENSG00000188761.13
XLOC_014227	XLOC_014227	BCL2L2,BCL2L2-PABPN1,PABPN1	10.3993	0.103993	chr14:23306832-23326185	TKS4_WT	TKS4_WT_T	123556	136405	0.142725	123556	136405	0.142731	0.1427	0.8426	0.0743785	0.999503	protein_coding,protein_coding,protein_coding
XLOC_025039	XLOC_025039	BCL3,MIR8085	-55.0834	-0.550834	chr19:44742619-44760044	TKS4_WT	TKS4_WT_T	7899.01	3547.97	-1.15468	7899.01	3547.97	-1.15468	-0.872261	0.24355	0.613412	0.999503	protein_coding,miRNA
XLOC_037508	XLOC_037508	BCL6	-29.7109	-0.297109	chr3:187698258-187745472	TKS4_WT	TKS4_WT_T	14356	10090.7	-0.508626	14356	10090.7	-0.508628	-0.435903	0.5464	0.262489	0.999503	protein_coding	chr3	187721377-187745725	-	ENSG00000113916.18
XLOC_020603	XLOC_020603	BCL6B	-12.1174	-0.121174	chr17:7023049-7029644	TKS4_WT	TKS4_WT_T	312.442	274.582	-0.186352	312.442	274.582	-0.186351	-0.121378	0.902	0.0447935	0.999503	protein_coding	chr17	7023050-7030290	+	ENSG00000161940.11
XLOC_011226	XLOC_011226	BCL7A	35.2294	0.352294	chr12:122021883-122062044	TKS4_WT	TKS4_WT_T	15470.9	20921.2	0.435416	15470.9	20921.2	0.435408	0.422614	0.5684	0.245346	0.999503	protein_coding	chr12	122019422-122062044	+	ENSG00000110987.9
XLOC_049914	XLOC_049914	BCL7B	4.67772	0.0467772	chr7:73536355-73557690	TKS4_WT	TKS4_WT_T	24385.8	25526.5	0.0659531	24385.8	25526.5	0.0659544	0.0689788	0.9267	0.0330608	0.999503	protein_coding	chr7	73536356-73557690	-	ENSG00000106635.8
XLOC_019791	XLOC_019791	BCL7C	-29.0306	-0.290306	chr16:30833625-30895220	TKS4_WT	TKS4_WT_T	32077.9	22765.5	-0.494731	32077.9	22765.5	-0.494731	-0.516998	0.4637	0.333763	0.999503	protein_coding	chr16	30833626-30894302	-	ENSG00000099385.12
XLOC_001383	XLOC_001383	BCL9	-29.0327	-0.290327	chr1:147541500-147670524	TKS4_WT	TKS4_WT_T	36033.5	25572	-0.494772	36033.5	25572	-0.494774	-0.441667	0.52835	0.277078	0.999503	protein_coding	chr1	147541501-147626216	+	ENSG00000116128.12
XLOC_009793	XLOC_009793	BCL9L	-49.1553	-0.491553	chr11:118883891-118926071	TKS4_WT	TKS4_WT_T	124589	63346.9	-0.975833	124589	63346.9	-0.975831	-0.872669	0.18545	0.731773	0.999503	protein_coding	chr11	118893875-118925926	-	ENSG00000186174.13
XLOC_045652	XLOC_045652	BCLAF1	-20.082	-0.20082	chr6:136256626-136289851	TKS4_WT	TKS4_WT_T	313809	250790	-0.323403	313809	250790	-0.323407	-0.282324	0.687	0.163043	0.999503	protein_coding	chr6	136256627-136289851	-	ENSG00000029363.17
XLOC_056780	XLOC_056780	BCLAF3	-32.8458	-0.328458	chrX:19912859-19991040	TKS4_WT	TKS4_WT_T	9035.55	6067.75	-0.57445	9035.55	6067.75	-0.574451	-0.499324	0.57395	0.241126	0.999503	protein_coding	chrX	19912860-19991061	-	ENSG00000173681.17
XLOC_019243	XLOC_019243	BCO1	7.49282	0.0749282	chr16:81238447-81291142	TKS4_WT	TKS4_WT_T	26.468	28.4512	0.104237	26.468	28.4512	0.10424	0	1	0	1	protein_coding	chr16	81238689-81291142	+	ENSG00000135697.10
XLOC_008304	XLOC_008304	BCO2,RPS12P21	-48.0219	-0.480219	chr11:112175511-112218946	TKS4_WT	TKS4_WT_T	4844.44	2518.05	-0.944024	4844.44	2518.05	-0.944023	-0.743406	0.2629	0.580209	0.999503	protein_coding,processed_pseudogene
XLOC_056858	XLOC_056858	BCOR	-30.3707	-0.303707	chrX:40051245-40177390	TKS4_WT	TKS4_WT_T	32580.1	22685.3	-0.522235	32580.1	22685.3	-0.522233	-0.452767	0.55435	0.256216	0.999503	protein_coding	chrX	40049815-40177329	-	ENSG00000183337.18
XLOC_056426	XLOC_056426	BCORL1	-49.6403	-0.496403	chrX:129980284-130058083	TKS4_WT	TKS4_WT_T	47028.5	23683.4	-0.98966	47028.5	23683.4	-0.989659	-0.797583	0.3434	0.4642	0.999503	protein_coding	chrX	129981107-130058071	+	ENSG00000085185.16
XLOC_033584	XLOC_033584	BCR	4.29911	0.0429911	chr22:23180508-23318474	TKS4_WT	TKS4_WT_T	64978.6	67772.1	0.060727	64978.6	67772.1	0.0607268	0.0614322	0.9277	0.0325924	0.999503	protein_coding	chr22	23179704-23318037	+	ENSG00000186716.21
XLOC_034080	XLOC_034080	BCRP8,RSPH14	-83.9769	-0.839769	chr22:23059407-23180172	TKS4_WT	TKS4_WT_T	346.273	55.4838	-2.64177	346.273	55.4838	-2.64177	-0.173685	0.0306	1.51428	0.999503	processed_pseudogene,protein_coding
XLOC_029204	XLOC_029204	BCS1L	96.6722	0.966722	chr2:218659682-218663443	TKS4_WT	TKS4_WT_T	23282.5	45790.2	0.975792	23282.5	45790.2	0.975793	1.00113	0.1729	0.762205	0.999503	protein_coding	chr2	218658764-218663443	+	ENSG00000074582.15
XLOC_037616	XLOC_037616	BDH1	-20.8854	-0.208854	chr3:197509782-197573343	TKS4_WT	TKS4_WT_T	19199.5	15189.6	-0.337987	19199.5	15189.6	-0.337985	-0.331974	0.65485	0.183858	0.999503	protein_coding	chr3	197509783-197573323	-	ENSG00000161267.12
XLOC_039678	XLOC_039678	BDH2	68.2419	0.682419	chr4:103077591-103099862	TKS4_WT	TKS4_WT_T	4838.67	8140.67	0.750536	4838.67	8140.67	0.750537	0.667036	0.3613	0.442132	0.999503	protein_coding	chr4	103077592-103099870	-	ENSG00000164039.15
XLOC_014796	XLOC_014796	BDKRB1	82.1215	0.821215	chr14:96256209-96264763	TKS4_WT	TKS4_WT_T	31.2442	56.9024	0.864901	31.2442	56.9024	0.864901	0	1	0	1	protein_coding	chr14	96256210-96268967	+	ENSG00000100739.11
XLOC_014794	XLOC_014794	BDKRB2	31.5055	0.315055	chr14:96204838-96244164	TKS4_WT	TKS4_WT_T	302.89	398.317	0.395124	302.89	398.317	0.395123	0.264919	0.8039	0.094798	0.999503	protein_coding	chr14	96204679-96244166	+	ENSG00000168398.7
XLOC_008899	XLOC_008899	BDNF	19.1451	0.191451	chr11:27506851-27722030	TKS4_WT	TKS4_WT_T	85170.1	101476	0.252716	85170.1	101476	0.25272	0.276323	0.7169	0.144541	0.999503	protein_coding	chr11	27654893-27722058	-	ENSG00000176697.20
XLOC_040744	XLOC_040744	BDP1	-19.2037	-0.192037	chr5:71455635-71578288	TKS4_WT	TKS4_WT_T	107896	87176	-0.307639	107896	87176	-0.307638	-0.299377	0.6869	0.163106	0.999503	protein_coding	chr5	71455651-71567820	+	ENSG00000145734.20
XLOC_019094	XLOC_019094	BEAN1	-40.817	-0.40817	chr16:66427294-66495288	TKS4_WT	TKS4_WT_T	427.866	253.224	-0.756749	427.866	253.224	-0.756745	-0.368378	0.43335	0.363161	0.999503	protein_coding	chr16	66427295-66493529	+	ENSG00000166546.14
XLOC_022303	XLOC_022303	BECN1	31.9787	0.319787	chr17:42798748-42824282	TKS4_WT	TKS4_WT_T	43142.5	56938.9	0.400305	43142.5	56938.9	0.400305	0.436709	0.5669	0.246494	0.999503	protein_coding	chr17	42810134-42833350	-	ENSG00000126581.13
XLOC_002383	XLOC_002383	BECN2	-8.93926	-0.0893926	chr1:241957766-241959062	TKS4_WT	TKS4_WT_T	31.2442	28.4512	-0.135099	31.2442	28.4512	-0.135099	0	1	0	1	protein_coding	chr1	241957767-241959062	+	ENSG00000196289.7
XLOC_015747	XLOC_015747	BEGAIN	-23.1589	-0.231589	chr14:100537146-100587417	TKS4_WT	TKS4_WT_T	3697.16	2840.94	-0.380049	3697.16	2840.94	-0.380049	-0.252287	0.6013	0.220909	0.999503	protein_coding	chr14	100537147-100587417	-	ENSG00000183092.18
XLOC_045441	XLOC_045441	BEND3	8.2903	0.082903	chr6:107065181-107115515	TKS4_WT	TKS4_WT_T	20428.7	22122.3	0.114905	20428.7	22122.3	0.114904	0.121695	0.8639	0.0635365	0.999503	protein_coding	chr6	107065182-107115515	-	ENSG00000178409.14
XLOC_043754	XLOC_043754	BEND6	-34.9708	-0.349708	chr6:56954980-57027652	TKS4_WT	TKS4_WT_T	3607.61	2346	-0.620839	3607.61	2346	-0.62084	-0.48513	0.4686	0.329198	0.999503	protein_coding	chr6	56955107-57027346	+	ENSG00000151917.18
XLOC_006164	XLOC_006164	BEND7	-1.76993	-0.0176993	chr10:13438480-13530264	TKS4_WT	TKS4_WT_T	13768.9	13525.2	-0.0257681	13768.9	13525.2	-0.0257634	-0.0248162	0.9685	0.0139004	0.999503	protein_coding	chr10	13438484-13529014	-	ENSG00000165626.19
XLOC_007779	XLOC_007779	BEST1	3.38204	0.0338204	chr11:61946721-61967634	TKS4_WT	TKS4_WT_T	14911.1	15415.4	0.047986	14911.1	15415.4	0.0479856	0.00510817	0.97465	0.0111513	0.999503	protein_coding	chr11	61950063-61965515	+	ENSG00000167995.17
XLOC_024512	XLOC_024512	BEST2	-5.08993	-0.0508993	chr19:12751790-12758458	TKS4_WT	TKS4_WT_T	115.424	109.549	-0.0753727	115.424	109.549	-0.0753669	-0.0313901	0.89635	0.0475224	0.999503	protein_coding	chr19	12751702-12758458	+	ENSG00000039987.7
XLOC_012086	XLOC_012086	BEST3	-3.7961	-0.037961	chr12:69624414-69699416	TKS4_WT	TKS4_WT_T	257.317	247.549	-0.0558314	257.317	247.549	-0.0558327	-0.0258512	0.9515	0.0215912	0.999503	protein_coding	chr12	69643360-69699476	-	ENSG00000127325.19
XLOC_003085	XLOC_003085	BEST4	-33.1938	-0.331938	chr1:44782144-44792828	TKS4_WT	TKS4_WT_T	298.113	199.158	-0.581945	298.113	199.158	-0.581946	-0.360788	0.7017	0.153849	0.999503	protein_coding	chr1	44783585-44788170	-	ENSG00000142959.5
XLOC_050053	XLOC_050053	BET1	29.5949	0.295949	chr7:93962761-94067754	TKS4_WT	TKS4_WT_T	13394.2	17358.2	0.374003	13394.2	17358.2	0.374009	0.375776	0.58095	0.235861	0.999503	protein_coding	chr7	93962762-94004382	-	ENSG00000105829.13
XLOC_008551	XLOC_008551	BET1L	18.0745	0.180745	chr11:202923-207399	TKS4_WT	TKS4_WT_T	40428.2	47735.4	0.239698	40428.2	47735.4	0.239698	0.259712	0.7239	0.140321	0.999503	protein_coding	chr11	167784-207399	-	ENSG00000177951.18
XLOC_057299	XLOC_057299	BEX2	45.8334	0.458334	chrX:103309345-103310990	TKS4_WT	TKS4_WT_T	15074.6	21983.8	0.544317	15074.6	21983.8	0.544321	0.484728	0.5144	0.288699	0.999503	protein_coding	chrX	103309346-103311007	-	ENSG00000133134.12
XLOC_056250	XLOC_056250	BEX3	30.2511	0.302511	chrX:103376322-103378164	TKS4_WT	TKS4_WT_T	40043.5	52157.1	0.381295	40043.5	52157.1	0.381296	0.404719	0.56305	0.249453	0.999503	protein_coding	chrX	103376395-103378164	+	ENSG00000166681.14
XLOC_056247	XLOC_056247	BEX4	-45.3636	-0.453636	chrX:103215091-103217246	TKS4_WT	TKS4_WT_T	156.221	85.3536	-0.872064	156.221	85.3536	-0.872064	0	1	0	1	protein_coding	chrX	103215108-103217246	+	ENSG00000102409.10
XLOC_018621	XLOC_018621	BFAR	3.18361	0.0318361	chr16:14632830-14669236	TKS4_WT	TKS4_WT_T	59831.5	61736.3	0.0452139	59831.5	61736.3	0.0452138	0.0478091	0.94665	0.0238106	0.999503	protein_coding	chr16	14632931-14669236	+	ENSG00000103429.11
XLOC_032143	XLOC_032143	BFSP1	-72.0377	-0.720377	chr20:17493904-17609919	TKS4_WT	TKS4_WT_T	6420.58	1795.34	-1.83845	6420.58	1795.34	-1.83845	-0.277273	0.26435	0.577821	0.999503	protein_coding	chr20	17493905-17569220	-	ENSG00000125864.14
XLOC_035716	XLOC_035716	BFSP2	2.13314	0.0213314	chr3:133397881-133491760	TKS4_WT	TKS4_WT_T	26.468	27.0326	0.0304486	26.468	27.0326	0.0304511	0	1	0	1	protein_coding	chr3	133400056-133475222	+	ENSG00000170819.5
XLOC_001587	XLOC_001587	BGLAP,PMF1,PMF1-BGLAP	61.5225	0.615225	chr1:156212987-156248522	TKS4_WT	TKS4_WT_T	40211.5	64950.6	0.691734	40211.5	64950.6	0.691735	0.707333	0.3294	0.482276	0.999503	protein_coding,protein_coding,protein_coding
XLOC_048761	XLOC_048761	BHLHA15	8.5335	0.085335	chr7:98211438-98252235	TKS4_WT	TKS4_WT_T	12859.9	13957.3	0.118145	12859.9	13957.3	0.11814	0.070382	0.91545	0.0383654	0.999503	protein_coding	chr7	98211439-98215457	+	ENSG00000180535.4
XLOC_020517	XLOC_020517	BHLHA9	137900	1379	chr17:1270443-1271815	TKS4_WT	TKS4_WT_T	0	138		0.1	138	10.4305		0.0343	1.46471	0.999503	protein_coding	chr17	1270444-1271815	+	ENSG00000205899.4
XLOC_032613	XLOC_032613	BHLHE23	26932.6	269.326	chr20:63005926-63006964	TKS4_WT	TKS4_WT_T	0	27.0326		0.1	27.0326	8.07856	0	1	0	1	protein_coding	chr20	63005927-63007035	-	ENSG00000125533.6
XLOC_034741	XLOC_034741	BHLHE40	-36.6679	-0.366679	chr3:4896808-4985323	TKS4_WT	TKS4_WT_T	33891.2	21464	-0.65899	33891.2	21464	-0.658992	-0.566127	0.4743	0.323947	0.999503	protein_coding	chr3	4979437-4985323	+	ENSG00000134107.5
XLOC_011636	XLOC_011636	BHLHE41	33.2988	0.332988	chr12:26120029-26234777	TKS4_WT	TKS4_WT_T	2406.6	3207.97	0.414665	2406.6	3207.97	0.414664	0.29818	0.686	0.163676	0.999503	protein_coding	chr12	26120030-26125037	-	ENSG00000123095.6
XLOC_005396	XLOC_005396	BICC1	264.244	2.64244	chr10:58512871-58831435	TKS4_WT	TKS4_WT_T	31.2442	113.805	1.8649	31.2442	113.805	1.8649	0	1	0	1	protein_coding	chr10	58512872-58831435	+	ENSG00000122870.12
XLOC_010442	XLOC_010442	BICD1	-62.688	-0.62688	chr12:32106772-32383637	TKS4_WT	TKS4_WT_T	45915	17131.8	-1.42229	45915	17131.8	-1.42229	-1.53765	0.07825	1.10652	0.999503	protein_coding	chr12	32106835-32383633	+	ENSG00000151746.15
XLOC_054917	XLOC_054917	BICD2	-22.0534	-0.220534	chr9:92711362-92764841	TKS4_WT	TKS4_WT_T	61270.9	47758.6	-0.35944	61270.9	47758.6	-0.359441	-0.374587	0.6078	0.216239	0.999503	protein_coding	chr9	92711363-92764833	-	ENSG00000185963.14
XLOC_011191	XLOC_011191	BICDL1	-27.2008	-0.272008	chr12:119989235-120094495	TKS4_WT	TKS4_WT_T	14871.6	10826.4	-0.458017	14871.6	10826.4	-0.458006	-0.39341	0.5735	0.241467	0.999503	protein_coding	chr12	119989236-120094494	+	ENSG00000135127.12
XLOC_019460	XLOC_019460	BICDL2	12.0202	0.120202	chr16:3022619-3039133	TKS4_WT	TKS4_WT_T	4374.98	4900.86	0.163757	4374.98	4900.86	0.163759	0.0508932	0.91995	0.0362358	0.999503	protein_coding	chr16	3027682-3036944	-	ENSG00000162069.16
XLOC_025098	XLOC_025098	BICRA	-60.8885	-0.608885	chr19:47608195-47703277	TKS4_WT	TKS4_WT_T	14152.6	5535.29	-1.35434	14152.6	5535.29	-1.35434	-0.8857	0.2468	0.607655	0.999503	protein_coding	chr19	47608196-47703277	+	ENSG00000063169.12
XLOC_043628	XLOC_043628	BICRAL,LOC401261	-13.8383	-0.138383	chr6:42746986-42868560	TKS4_WT	TKS4_WT_T	38394.2	33081.1	-0.214879	38394.2	33081.1	-0.214881	-0.22726	0.7924	0.101056	0.999503	protein_coding,-
XLOC_033976	XLOC_033976	BID	-46.6621	-0.466621	chr22:17734137-17774665	TKS4_WT	TKS4_WT_T	51330.7	27378.7	-0.90677	51330.7	27378.7	-0.906768	-0.891906	0.19955	0.699948	0.999503	protein_coding	chr22	17734138-17774770	-	ENSG00000015475.19
XLOC_033842	XLOC_033842	BIK	1.51567	0.0151567	chr22:43110749-43129712	TKS4_WT	TKS4_WT_T	18882.7	19168.9	0.0217031	18882.7	19168.9	0.0217025	0.0203615	0.9788	0.00930604	0.999503	protein_coding	chr22	43110750-43129712	+	ENSG00000100290.3
XLOC_030463	XLOC_030463	BIN1	-29.6031	-0.296031	chr2:127048022-127107154	TKS4_WT	TKS4_WT_T	23446.5	16505.6	-0.50642	23446.5	16505.6	-0.506417	-0.48416	0.49575	0.304737	0.999503	protein_coding	chr2	127048027-127107288	-	ENSG00000136717.15
XLOC_011837	XLOC_011837	BIN2	159.561	1.59561	chr12:51281037-51324668	TKS4_WT	TKS4_WT_T	93.7326	243.293	1.37608	93.7326	243.293	1.37607	0	1	0	1	protein_coding	chr12	51281038-51324668	-	ENSG00000110934.13
XLOC_051964	XLOC_051964	BIN3	-7.36078	-0.0736078	chr8:22599598-22669148	TKS4_WT	TKS4_WT_T	21360.5	19788.2	-0.110307	21360.5	19788.2	-0.110305	-0.0470105	0.9369	0.0283068	0.999503	protein_coding	chr8	22620418-22669148	-	ENSG00000147439.14
XLOC_008237	XLOC_008237	BIRC2	-6.21427	-0.0621427	chr11:102347213-102378670	TKS4_WT	TKS4_WT_T	75102.9	70435.8	-0.0925601	75102.9	70435.8	-0.0925597	-0.099308	0.8858	0.0526643	0.999503	protein_coding	chr11	102347211-102378670	+	ENSG00000110330.10
XLOC_008236	XLOC_008236	BIRC3	109.348	1.09348	chr11:102317372-102339403	TKS4_WT	TKS4_WT_T	4058.96	8497.37	1.06591	4058.96	8497.37	1.06591	0.960602	0.17585	0.754858	0.999503	protein_coding	chr11	102317450-102339403	+	ENSG00000023445.16
XLOC_021572	XLOC_021572	BIRC5	15.0604	0.150604	chr17:78214252-78225635	TKS4_WT	TKS4_WT_T	222278	255754	0.202392	222278	255754	0.202392	0.189705	0.81135	0.0907918	0.999503	protein_coding	chr17	78214186-78225636	+	ENSG00000089685.15
XLOC_027846	XLOC_027846	BIRC6	-11.7505	-0.117505	chr2:32356906-32618899	TKS4_WT	TKS4_WT_T	324225	286127	-0.180342	324225	286127	-0.18034	-0.177599	0.82545	0.0833092	0.999503	protein_coding	chr2	32357023-32618878	+	ENSG00000115760.15
XLOC_031959	XLOC_031959	BIRC7	-54.4696	-0.544696	chr20:63235904-63240495	TKS4_WT	TKS4_WT_T	62.4884	28.4512	-1.1351	62.4884	28.4512	-1.1351	0	1	0	1	protein_coding	chr20	63235883-63240495	+	ENSG00000101197.13
XLOC_024611	XLOC_024611	BISPR,MVB12A	18.4743	0.184743	chr19:17405685-17425332	TKS4_WT	TKS4_WT_T	29857.1	35373	0.244575	29857.1	35373	0.244575	0.256149	0.70305	0.153014	0.999503	lncRNA,protein_coding
XLOC_013287	XLOC_013287	BIVM,BIVM-ERCC5,ERCC5	-15.7737	-0.157737	chr13:102799118-102876001	TKS4_WT	TKS4_WT_T	41927.5	35314	-0.247657	41927.5	35314	-0.247657	-0.245462	0.7305	0.13638	0.999503	protein_coding,protein_coding,protein_coding
XLOC_004497	XLOC_004497	BLACAT1	-16.024	-0.16024	chr1:205373251-205469024	TKS4_WT	TKS4_WT_T	2730.78	2293.2	-0.251954	2730.78	2293.2	-0.251951	-0.132516	0.8512	0.0699684	0.999503	protein_coding	chr1	205434885-205457091	-	ENSG00000281406.2
XLOC_032364	XLOC_032364	BLCAP	-0.712834	-0.00712834	chr20:37517416-37527876	TKS4_WT	TKS4_WT_T	24648.1	24472.4	-0.010318	24648.1	24472.4	-0.0103208	-0.0108886	0.9874	0.00550688	0.999503	protein_coding	chr20	37492472-37527931	-	ENSG00000166619.15
XLOC_009830	XLOC_009830	BLID	-16.1918	-0.161918	chr11:122028328-122422871	TKS4_WT	TKS4_WT_T	5954.91	4990.7	-0.254835	5954.91	4990.7	-0.254838	-0.0715983	0.91335	0.0393628	0.999503	protein_coding	chr11	122115340-122116215	-	ENSG00000259571.2
XLOC_050830	XLOC_050830	BLK	28351.2	283.512	chr8:11493990-11564599	TKS4_WT	TKS4_WT_T	0	28.4512		0.1	28.4512	8.15235	0	1	0	1	protein_coding	chr8	11486894-11564599	+	ENSG00000136573.15
XLOC_017032	XLOC_017032	BLM	-6.15287	-0.0615287	chr15:90717345-90816166	TKS4_WT	TKS4_WT_T	62892.6	59022.9	-0.0916169	62892.6	59022.9	-0.0916155	-0.0895179	0.91005	0.0409347	0.999503	protein_coding	chr15	90717346-90816166	+	ENSG00000197299.13
XLOC_022053	XLOC_022053	BLMH	1.79649	0.0179649	chr17:30248202-30291944	TKS4_WT	TKS4_WT_T	45761.4	46583.5	0.0256854	45761.4	46583.5	0.0256878	0.0282213	0.96745	0.0143715	0.999503	protein_coding	chr17	30248203-30292056	-	ENSG00000108578.15
XLOC_006783	XLOC_006783	BLNK,NPM1P25	173.182	1.73182	chr10:96128905-96271569	TKS4_WT	TKS4_WT_T	31.2442	85.3536	1.44986	31.2442	85.3536	1.44986	0	1	0	1	protein_coding,processed_pseudogene
XLOC_010673	XLOC_010673	BLOC1S1,BLOC1S1-RDH5,RDH5	6.79537	0.0679537	chr12:55681735-55724742	TKS4_WT	TKS4_WT_T	31349.3	33479.6	0.0948488	31349.3	33479.6	0.0948491	0.072441	0.9337	0.0297926	0.999503	protein_coding,-,protein_coding
XLOC_006830	XLOC_006830	BLOC1S2	24.4929	0.244929	chr10:100273277-100286712	TKS4_WT	TKS4_WT_T	49511.1	61637.8	0.316061	49511.1	61637.8	0.316063	0.330033	0.6273	0.202525	0.999503	protein_coding	chr10	100273280-100286680	-	ENSG00000196072.12
XLOC_025056	XLOC_025056	BLOC1S3	16.436	0.16436	chr19:45162932-45202715	TKS4_WT	TKS4_WT_T	7383.38	8596.91	0.219537	7383.38	8596.91	0.219537	0.150924	0.84125	0.0750749	0.999503	protein_coding	chr19	45178784-45216933	+	ENSG00000189114.8
XLOC_037883	XLOC_037883	BLOC1S4	36.2659	0.362659	chr4:6716173-6717664	TKS4_WT	TKS4_WT_T	10338.1	14087.3	0.446429	10338.1	14087.3	0.446424	0.420997	0.55165	0.258336	0.999503	protein_coding	chr4	6716174-6717664	+	ENSG00000186222.5
XLOC_016610	XLOC_016610	BLOC1S6	-3.56282	-0.0356282	chr15:45587122-45609716	TKS4_WT	TKS4_WT_T	92640.1	89339.5	-0.0523389	92640.1	89339.5	-0.0523386	-0.053437	0.9425	0.0257186	0.999503	protein_coding	chr15	45587214-45615945	+	ENSG00000104164.12
XLOC_048331	XLOC_048331	BLVRA,LOC107986727	-9.31127	-0.0931127	chr7:43754840-43839020	TKS4_WT	TKS4_WT_T	13733.9	12455.1	-0.141008	13733.9	12455.1	-0.141005	-0.135064	0.86525	0.0628584	0.999503	protein_coding,-
XLOC_026136	XLOC_026136	BLVRB	-40.9233	-0.409233	chr19:40447767-40465745	TKS4_WT	TKS4_WT_T	39393	23272.1	-0.759335	39393	23272.1	-0.759338	-0.774129	0.2766	0.558148	0.999503	protein_coding	chr19	40447765-40465764	-	ENSG00000090013.11
XLOC_001784	XLOC_001784	BLZF1	7.23301	0.0723301	chr1:169368194-169462221	TKS4_WT	TKS4_WT_T	27167.1	29132.1	0.100749	27167.1	29132.1	0.100749	0.0981667	0.8945	0.0484197	0.999503	protein_coding	chr1	169367970-169396540	+	ENSG00000117475.14
XLOC_018638	XLOC_018638	BMERB1	11.0537	0.110537	chr16:15434587-15588259	TKS4_WT	TKS4_WT_T	18428.3	20465.3	0.151258	18428.3	20465.3	0.151257	0.151961	0.82975	0.0810527	0.999503	protein_coding	chr16	15434475-15625028	+	ENSG00000166780.11
XLOC_017355	XLOC_017355	BMF	2.2754	0.022754	chr15:40087889-40108879	TKS4_WT	TKS4_WT_T	2132.37	2180.89	0.0324622	2132.37	2180.89	0.0324592	0.0224285	0.975	0.0109954	0.999503	protein_coding	chr15	40087890-40108892	-	ENSG00000104081.14
XLOC_005124	XLOC_005124	BMI1,COMMD3,COMMD3-BMI1	21.9281	0.219281	chr10:22316387-22331484	TKS4_WT	TKS4_WT_T	161022	196331	0.286029	161022	196331	0.28603	0.282692	0.69675	0.156923	0.999503	protein_coding,protein_coding,protein_coding
XLOC_050916	XLOC_050916	BMP1	-14.4561	-0.144561	chr8:22165371-22212326	TKS4_WT	TKS4_WT_T	29470.6	25210.3	-0.225266	29470.6	25210.3	-0.225263	-0.219836	0.78225	0.106654	0.999503	protein_coding	chr8	22165140-22212326	+	ENSG00000168487.20
XLOC_029959	XLOC_029959	BMP10	73.0408	0.730408	chr2:68860908-68871397	TKS4_WT	TKS4_WT_T	31.2442	54.0652	0.791113	31.2442	54.0652	0.791112	0	1	0	1	protein_coding	chr2	68860909-68871397	-	ENSG00000163217.2
XLOC_038371	XLOC_038371	BMP2K	-44.6426	-0.446426	chr4:78776349-78939438	TKS4_WT	TKS4_WT_T	97288.5	53856.4	-0.853151	97288.5	53856.4	-0.853151	-0.677809	0.37565	0.425217	0.999503	protein_coding	chr4	78776342-78916365	+	ENSG00000138756.19
XLOC_015366	XLOC_015366	BMP4	8.56344	0.0856344	chr14:53949735-53956891	TKS4_WT	TKS4_WT_T	156339	169727	0.118546	156339	169727	0.118538	0.123222	0.85865	0.0661838	0.999503	protein_coding	chr14	53949736-53958761	-	ENSG00000125378.16
XLOC_045183	XLOC_045183	BMP5	63.9416	0.639416	chr6:55753652-55875590	TKS4_WT	TKS4_WT_T	115.424	189.228	0.713178	115.424	189.228	0.713182	0.362622	0.65675	0.1826	0.999503	protein_coding	chr6	55753653-55875590	-	ENSG00000112175.8
XLOC_043035	XLOC_043035	BMP6	-26.0366	-0.260366	chr6:7726098-8102595	TKS4_WT	TKS4_WT_T	2885.21	2134	-0.435119	2885.21	2134	-0.435116	-0.030768	0.81565	0.0884962	0.999503	protein_coding	chr6	7726099-7881728	+	ENSG00000153162.9
XLOC_032549	XLOC_032549	BMP7	-5.63219	-0.0563219	chr20:57168752-57267901	TKS4_WT	TKS4_WT_T	8989.58	8483.27	-0.0836333	8989.58	8483.27	-0.0836332	-0.0744754	0.9151	0.0385314	0.999503	protein_coding	chr20	57168753-57266641	-	ENSG00000101144.13
XLOC_000552	XLOC_000552	BMP8A	-62.878	-0.62878	chr1:39491625-39559698	TKS4_WT	TKS4_WT_T	9592.17	3560.81	-1.42965	9592.17	3560.81	-1.42965	-1.05253	0.13965	0.854959	0.999503	protein_coding	chr1	39491636-39529869	+	ENSG00000183682.8
XLOC_003013	XLOC_003013	BMP8B	-63.9044	-0.639044	chr1:39738844-39788865	TKS4_WT	TKS4_WT_T	17377.5	6272.51	-1.47011	17377.5	6272.51	-1.47011	-0.460858	0.4679	0.329847	0.999503	protein_coding	chr1	39757182-39788865	-	ENSG00000116985.12
XLOC_048264	XLOC_048264	BMPER	388287	3882.87	chr7:33904914-34156427	TKS4_WT	TKS4_WT_T	0	388.387		0.1	388.387	11.9233		0.0001	4	0.0356655	protein_coding	chr7	33904308-34156427	+	ENSG00000164619.10
XLOC_005603	XLOC_005603	BMPR1A	7.46097	0.0746097	chr10:86755785-86927969	TKS4_WT	TKS4_WT_T	67808.9	72868.1	0.103813	67808.9	72868.1	0.103813	0.11387	0.87445	0.058265	0.999503	protein_coding	chr10	86756601-86932825	+	ENSG00000107779.14
XLOC_038460	XLOC_038460	BMPR1B	295.756	2.95756	chr4:94757954-95158453	TKS4_WT	TKS4_WT_T	146.669	580.452	1.98462	146.669	580.452	1.98461	0.773637	0.0212	1.67366	0.999503	protein_coding	chr4	94757955-95158448	+	ENSG00000138696.11
XLOC_029075	XLOC_029075	BMPR2	-31.4072	-0.314072	chr2:202376309-202567751	TKS4_WT	TKS4_WT_T	50669.3	34755.5	-0.543873	50669.3	34755.5	-0.543871	-0.553659	0.444	0.352617	0.999503	protein_coding	chr2	202376327-202567751	+	ENSG00000204217.16
XLOC_005274	XLOC_005274	BMS1	5.70752	0.0570752	chr10:42782774-42834937	TKS4_WT	TKS4_WT_T	152080	160760	0.0800815	152080	160760	0.080078	0.0915037	0.8988	0.0463369	0.999503	protein_coding	chr10	42782795-42834937	+	ENSG00000165733.8
XLOC_050225	XLOC_050225	BMT2	-13.5797	-0.135797	chr7:112819146-112939875	TKS4_WT	TKS4_WT_T	10712.2	9257.52	-0.210556	10712.2	9257.52	-0.210557	-0.184236	0.7915	0.101549	0.999503	protein_coding	chr7	112819147-112939875	-	ENSG00000164603.12
XLOC_055650	XLOC_055650	BMX	28351.2	283.512	chrX:15500776-15602158	TKS4_WT	TKS4_WT_T	0	28.4512		0.1	28.4512	8.15235	0	1	0	1	protein_coding	chrX	15464246-15556529	+	ENSG00000102010.15
XLOC_041427	XLOC_041427	BNIP1	48.4955	0.484955	chr5:173144446-173164387	TKS4_WT	TKS4_WT_T	9976.26	14814.3	0.570423	9976.26	14814.3	0.570419	0.52742	0.44165	0.354922	0.999503	protein_coding	chr5	173144442-173164387	+	ENSG00000113734.18
XLOC_017558	XLOC_017558	BNIP2	-5.40709	-0.0540709	chr15:59659145-59689320	TKS4_WT	TKS4_WT_T	76261	72137.5	-0.0801961	76261	72137.5	-0.080196	-0.0872003	0.896	0.047692	0.999503	protein_coding	chr15	59659146-59689534	-	ENSG00000140299.13
XLOC_007049	XLOC_007049	BNIP3	-22.7213	-0.227213	chr10:131900933-131982013	TKS4_WT	TKS4_WT_T	27701.3	21407.2	-0.371856	27701.3	21407.2	-0.371858	-0.27884	0.6911	0.160459	0.999503	protein_coding	chr10	131967684-131981967	-	ENSG00000176171.12
XLOC_050960	XLOC_050960	BNIP3L	-21.1577	-0.211577	chr8:26383053-26413127	TKS4_WT	TKS4_WT_T	43838	34562.9	-0.34296	43838	34562.9	-0.342958	-0.357924	0.5989	0.222646	0.999503	protein_coding	chr8	26383054-26505636	+	ENSG00000104765.16
XLOC_016564	XLOC_016564	BNIP3P5,GANC	-24.138	-0.24138	chr15:42208357-42353666	TKS4_WT	TKS4_WT_T	8694.05	6595.48	-0.398551	8694.05	6595.48	-0.398551	-0.137968	0.6857	0.163866	0.999503	processed_pseudogene,protein_coding
XLOC_001456	XLOC_001456	BNIPL,C1orf56	-21.9147	-0.219147	chr1:151036320-151059626	TKS4_WT	TKS4_WT_T	872.648	681.41	-0.356877	872.648	681.41	-0.356877	-0.0742521	0.8382	0.0766523	0.999503	protein_coding,protein_coding
XLOC_035514	XLOC_035514	BOC	43.5541	0.435541	chr3:113211002-113441514	TKS4_WT	TKS4_WT_T	1704.5	2446.88	0.521596	1704.5	2446.88	0.521595	0.195598	0.40905	0.388224	0.999503	protein_coding	chr3	113211003-113287459	+	ENSG00000144857.15
XLOC_042696	XLOC_042696	BOD1	18.1797	0.181797	chr5:173607144-173617072	TKS4_WT	TKS4_WT_T	44500.7	52590.8	0.240983	44500.7	52590.8	0.240982	0.251036	0.7102	0.148619	0.999503	protein_coding	chr5	173607145-173616659	-	ENSG00000145919.11
XLOC_039162	XLOC_039162	BOD1L1	-1.30462	-0.0130462	chr4:13568737-13627725	TKS4_WT	TKS4_WT_T	53103.4	52410.6	-0.018946	53103.4	52410.6	-0.0189456	-0.0197953	0.97915	0.00915077	0.999503	protein_coding	chr4	13568738-13627725	-	ENSG00000038219.13
XLOC_023552	XLOC_023552	BOD1L2	53965.2	539.652	chr18:57147086-57150410	TKS4_WT	TKS4_WT_T	0	54.0652		0.1	54.0652	9.07856	0	1	0	1	protein_coding	chr18	57147087-57150410	+	ENSG00000228075.5
XLOC_029419	XLOC_029419	BOK	-13.8016	-0.138016	chr2:241544383-241583536	TKS4_WT	TKS4_WT_T	36797.9	31719.2	-0.21427	36797.9	31719.2	-0.214267	-0.212394	0.78055	0.107599	0.999503	protein_coding	chr2	241551424-241574131	+	ENSG00000176720.6
XLOC_001426	XLOC_001426	BOLA1	27.7214	0.277214	chr1:149899567-149900795	TKS4_WT	TKS4_WT_T	9370.08	11967.6	0.353005	9370.08	11967.6	0.353001	0.326303	0.64495	0.190474	0.999503	protein_coding	chr1	149887890-149900798	+	ENSG00000178096.9
XLOC_019768	XLOC_019768	BOLA2B	7.49991	0.0749991	chr16:30192931-30193666	TKS4_WT	TKS4_WT_T	1373.75	1476.78	0.104338	1373.75	1476.78	0.104335	0.0722753	0.91095	0.0405055	0.999503	protein_coding	chr16	30192932-30194306	-	ENSG00000169627.9
XLOC_030024	XLOC_030024	BOLA3	7.61276	0.0761276	chr2:74135399-74147912	TKS4_WT	TKS4_WT_T	27210.9	29282.4	0.10585	27210.9	29282.4	0.105849	0.0921563	0.90315	0.0442401	0.999503	protein_coding	chr2	74135400-74147912	-	ENSG00000163170.12
XLOC_030958	XLOC_030958	BOLL	-99.6799	-0.996799	chr2:197726878-197786312	TKS4_WT	TKS4_WT_T	31.2442	0		31.2442	0.1	-8.28744	0	1	0	1	protein_coding	chr2	197726879-197786762	-	ENSG00000152430.19
XLOC_052818	XLOC_052818	BOP1	0.734182	0.00734182	chr8:144262044-144291438	TKS4_WT	TKS4_WT_T	185785	187149	0.0105522	185785	187149	0.0105533	0.0105471	0.989	0.00480371	0.999503	protein_coding	chr8	144262045-144291438	-	ENSG00000261236.8
XLOC_013122	XLOC_013122	BORA	-9.86186	-0.0986186	chr13:72727922-72781900	TKS4_WT	TKS4_WT_T	48891.4	44069.8	-0.149791	48891.4	44069.8	-0.14979	-0.0719997	0.91535	0.0384128	0.999503	protein_coding	chr13	72727749-72756198	+	ENSG00000136122.18
XLOC_010298	XLOC_010298	BORCS5	5.85265	0.0585265	chr12:12357077-12471233	TKS4_WT	TKS4_WT_T	13742.5	14546.8	0.0820562	13742.5	14546.8	0.0820573	0.0786942	0.91405	0.03903	0.999503	protein_coding	chr12	12357078-12471233	+	ENSG00000165714.11
XLOC_021808	XLOC_021808	BORCS6	38.9398	0.389398	chr17:8188344-8190180	TKS4_WT	TKS4_WT_T	7355.92	10220.3	0.474458	7355.92	10220.3	0.47446	0.408792	0.5712	0.243212	0.999503	protein_coding	chr17	8188345-8190180	-	ENSG00000196544.8
XLOC_025875	XLOC_025875	BORCS8,BORCS8-MEF2B,MEF2B	-8.32933	-0.0832933	chr19:19145566-19192152	TKS4_WT	TKS4_WT_T	11237.4	10301.4	-0.125466	11237.4	10301.4	-0.125468	-0.123174	0.87965	0.0556901	0.999503	protein_coding,protein_coding,protein_coding
XLOC_049068	XLOC_049068	BPGM	9.72072	0.0972072	chr7:134646852-134679816	TKS4_WT	TKS4_WT_T	7826.58	8587.38	0.133836	7826.58	8587.38	0.133836	0.117626	0.8702	0.0603809	0.999503	protein_coding	chr7	134646811-134679816	+	ENSG00000172331.12
XLOC_042992	XLOC_042992	BPHL	5.79411	0.0579411	chr6:3063966-3153599	TKS4_WT	TKS4_WT_T	13232.4	13999.1	0.0812567	13232.4	13999.1	0.0812593	0.0488316	0.94095	0.0264335	0.999503	protein_coding	chr6	3118374-3153578	+	ENSG00000137274.13
XLOC_004614	XLOC_004614	BPNT1	0.933452	0.00933452	chr1:220057481-220089916	TKS4_WT	TKS4_WT_T	41180.5	41564.9	0.0134035	41180.5	41564.9	0.0134044	0.013325	0.98145	0.00813182	0.999503	protein_coding	chr1	220057482-220090462	-	ENSG00000162813.18
XLOC_052224	XLOC_052224	BPNT2	13.3026	0.133026	chr8:56957930-56993874	TKS4_WT	TKS4_WT_T	133207	150927	0.180176	133207	150927	0.180181	0.184494	0.7949	0.0996875	0.999503	protein_coding	chr8	56957931-56993867	-	ENSG00000104331.9
XLOC_021444	XLOC_021444	BPTF	-25.9967	-0.259967	chr17:67825502-67984378	TKS4_WT	TKS4_WT_T	199675	147766	-0.434336	199675	147766	-0.434339	-0.441764	0.64395	0.191148	0.999503	protein_coding	chr17	67825503-67984378	+	ENSG00000171634.19
XLOC_050409	XLOC_050409	BRAF	-9.13204	-0.0913204	chr7:140713327-140924929	TKS4_WT	TKS4_WT_T	74993.1	68144.7	-0.138157	74993.1	68144.7	-0.138156	-0.156054	0.82875	0.0815765	0.999503	protein_coding	chr7	140719327-140924929	-	ENSG00000157764.14
XLOC_012357	XLOC_012357	BRAP	0.864779	0.00864779	chr12:111642145-111686023	TKS4_WT	TKS4_WT_T	30065.5	30325.5	0.0124238	30065.5	30325.5	0.0124225	0.0131626	0.98605	0.00610106	0.999503	protein_coding	chr12	111642146-111685956	-	ENSG00000089234.16
XLOC_049373	XLOC_049373	BRAT1	36.6665	0.366665	chr7:2537809-2555753	TKS4_WT	TKS4_WT_T	50073.5	68433.7	0.45066	50073.5	68433.7	0.45066	0.458022	0.5077	0.294393	0.999503	protein_coding	chr7	2537810-2555694	-	ENSG00000106009.16
XLOC_022310	XLOC_022310	BRCA1	19.7775	0.197775	chr17:43044294-43125364	TKS4_WT	TKS4_WT_T	81461.4	97572.4	0.260355	81461.4	97572.4	0.260357	0.264893	0.73145	0.135815	0.999503	protein_coding	chr17	43044295-43170245	-	ENSG00000012048.23
XLOC_012879	XLOC_012879	BRCA2	-12.4945	-0.124945	chr13:32315507-32400268	TKS4_WT	TKS4_WT_T	86181.1	75413.2	-0.192554	86181.1	75413.2	-0.192554	-0.193956	0.7882	0.103364	0.999503	protein_coding	chr13	32315086-32400268	+	ENSG00000139618.17
XLOC_056649	XLOC_056649	BRCC3	16.8049	0.168049	chrX:155071402-155126766	TKS4_WT	TKS4_WT_T	30693.4	35851.4	0.224104	30693.4	35851.4	0.224101	0.237632	0.76385	0.116992	0.999503	protein_coding	chrX	155071420-155123077	+	ENSG00000185515.16
XLOC_034441	XLOC_034441	BRD1	10.5374	0.105374	chr22:49773277-49827873	TKS4_WT	TKS4_WT_T	37862.2	41851.9	0.144534	37862.2	41851.9	0.144535	0.143471	0.8435	0.0739149	0.999503	protein_coding	chr22	49773283-49827873	-	ENSG00000100425.19
XLOC_043494	XLOC_043494	BRD2	-8.48175	-0.0848175	chr6:32968593-32981505	TKS4_WT	TKS4_WT_T	196917	180215	-0.12787	196917	180215	-0.127869	-0.121294	0.89425	0.0485411	0.999503	protein_coding	chr6	32968594-32981505	+	ENSG00000204256.14
XLOC_055323	XLOC_055323	BRD3	-30.806	-0.30806	chr9:134025475-134068533	TKS4_WT	TKS4_WT_T	34548.1	23905.2	-0.531281	34548.1	23905.2	-0.531282	-0.385312	0.638	0.195179	0.999503	protein_coding	chr9	134030305-134068535	-	ENSG00000169925.17
XLOC_054203	XLOC_054203	BRD3OS	2.82901	0.0282901	chr9:134025475-134068533	TKS4_WT	TKS4_WT_T	22371.8	23004.7	0.0402412	22371.8	23004.7	0.0402473	0.0244531	0.96845	0.0139228	0.999503	protein_coding	chr9	134025481-134034666	+	ENSG00000235106.10
XLOC_025808	XLOC_025808	BRD4	-36.6501	-0.366501	chr19:15235518-15332539	TKS4_WT	TKS4_WT_T	45314.8	28706.9	-0.658583	45314.8	28706.9	-0.658585	-0.59926	0.44815	0.348577	0.999503	protein_coding	chr19	15235519-15332545	-	ENSG00000141867.19
XLOC_019912	XLOC_019912	BRD7	-20.5333	-0.205333	chr16:50246137-50368988	TKS4_WT	TKS4_WT_T	66582	52910.5	-0.331578	66582	52910.5	-0.331578	-0.260606	0.7548	0.122168	0.999503	protein_coding	chr16	50313487-50368988	-	ENSG00000166164.16
XLOC_042435	XLOC_042435	BRD8	4.01088	0.0401088	chr5:138139769-138178630	TKS4_WT	TKS4_WT_T	42995.6	44720.1	0.0567338	42995.6	44720.1	0.0567344	0.0620379	0.9284	0.0322649	0.999503	protein_coding	chr5	138139770-138178953	-	ENSG00000112983.18
XLOC_041578	XLOC_041578	BRD9	4.99119	0.0499119	chr5:863734-892803	TKS4_WT	TKS4_WT_T	30139.1	31643.4	0.0702681	30139.1	31643.4	0.0702683	0.0698082	0.9153	0.0384365	0.999503	protein_coding	chr5	850291-892801	-	ENSG00000028310.18
XLOC_001020	XLOC_001020	BRDT	-8.93926	-0.0893926	chr1:91949370-92014428	TKS4_WT	TKS4_WT_T	31.2442	28.4512	-0.135099	31.2442	28.4512	-0.135099	0	1	0	1	protein_coding	chr1	91949343-92014426	+	ENSG00000137948.19
XLOC_015805	XLOC_015805	BRF1	-24.4448	-0.244448	chr14:105209285-105398147	TKS4_WT	TKS4_WT_T	24353.6	18400.4	-0.404392	24353.6	18400.4	-0.404398	-0.229435	0.6407	0.193345	0.999503	protein_coding	chr14	105209286-105315589	-	ENSG00000185024.18
XLOC_052092	XLOC_052092	BRF2	47.0772	0.470772	chr8:37796882-37849861	TKS4_WT	TKS4_WT_T	13451.1	19783.5	0.556572	13451.1	19783.5	0.556574	0.363839	0.5855	0.232473	0.999503	protein_coding	chr8	37843268-37849861	-	ENSG00000104221.13
XLOC_048762	XLOC_048762	BRI3	-5.68111	-0.0568111	chr7:98281672-98401090	TKS4_WT	TKS4_WT_T	19380	18279	-0.0843794	19380	18279	-0.0843814	-0.0407594	0.96545	0.0152702	0.999503	protein_coding	chr7	98252379-98310441	+	ENSG00000164713.10
XLOC_011258	XLOC_011258	BRI3BP	-21.7258	-0.217258	chr12:124993644-125051845	TKS4_WT	TKS4_WT_T	141744	110949	-0.353391	141744	110949	-0.353391	-0.38752	0.554	0.25649	0.999503	protein_coding	chr12	124993645-125031231	+	ENSG00000184992.13
XLOC_019433	XLOC_019433	BRICD5	-77.9371	-0.779371	chr16:2204627-2210863	TKS4_WT	TKS4_WT_T	1012.35	223.354	-2.18031	1012.35	223.354	-2.1803	-0.252129	0.3131	0.504317	0.999503	protein_coding	chr16	2209253-2210905	-	ENSG00000182685.8
XLOC_004367	XLOC_004367	BRINP3	55383.8	553.838	chr1:190097657-190477997	TKS4_WT	TKS4_WT_T	0	55.4838		0.1	55.4838	9.11592		5e-05	4.30103	0.0217956	protein_coding	chr1	190097658-190478404	-	ENSG00000162670.11
XLOC_022567	XLOC_022567	BRIP1	-39.32	-0.3932	chr17:61679138-61864120	TKS4_WT	TKS4_WT_T	79895.2	48480.4	-0.720708	79895.2	48480.4	-0.720707	-0.717231	0.34815	0.458234	0.999503	protein_coding	chr17	61679139-61863559	-	ENSG00000136492.10
XLOC_040534	XLOC_040534	BRIX1,TTC23L	14.9398	0.149398	chr5:34837713-34925996	TKS4_WT	TKS4_WT_T	105182	120896	0.20088	105182	120896	0.200879	0.156209	0.83145	0.0801639	0.999503	protein_coding,protein_coding
XLOC_034780	XLOC_034780	BRK1	15.6843	0.156843	chr3:10115674-10127190	TKS4_WT	TKS4_WT_T	45086.4	52157.9	0.210194	45086.4	52157.9	0.210193	0.213107	0.76215	0.11796	0.999503	protein_coding	chr3	10115675-10127190	+	ENSG00000254999.4
XLOC_025775	XLOC_025775	BRME1	-26.3645	-0.263645	chr19:13882347-13930879	TKS4_WT	TKS4_WT_T	846.18	623.089	-0.441527	846.18	623.089	-0.441526	-0.0744061	0.67565	0.170278	0.999503	protein_coding	chr19	13882348-13906452	-	ENSG00000132016.12
XLOC_009337	XLOC_009337	BRMS1	14.1226	0.141226	chr11:66337332-66345125	TKS4_WT	TKS4_WT_T	52501.6	59916.2	0.190584	52501.6	59916.2	0.190585	0.176947	0.7963	0.0989233	0.999503	protein_coding	chr11	66337333-66345125	-	ENSG00000174744.14
XLOC_014334	XLOC_014334	BRMS1L	-21.4101	-0.214101	chr14:35825595-35871963	TKS4_WT	TKS4_WT_T	8645.89	6794.8	-0.347584	8645.89	6794.8	-0.347583	-0.33394	0.6492	0.187621	0.999503	protein_coding	chr14	35826338-35932325	+	ENSG00000100916.14
XLOC_002211	XLOC_002211	BROX	-12.6979	-0.126979	chr1:222668012-222735196	TKS4_WT	TKS4_WT_T	65440.7	57131.1	-0.195911	65440.7	57131.1	-0.195912	-0.158532	0.84805	0.0715785	0.999503	protein_coding	chr1	222712553-222735196	+	ENSG00000162819.12
XLOC_034766	XLOC_034766	BRPF1	-3.79957	-0.0379957	chr3:9731728-9748016	TKS4_WT	TKS4_WT_T	34461.8	33152.4	-0.0558854	34461.8	33152.4	-0.0558847	-0.0601765	0.9409	0.0264565	0.999503	protein_coding	chr3	9731729-9748019	+	ENSG00000156983.17
XLOC_043558	XLOC_043558	BRPF3	-24.2963	-0.242963	chr6:36196743-36232790	TKS4_WT	TKS4_WT_T	30230.9	22885.9	-0.401564	30230.9	22885.9	-0.401565	-0.413483	0.57445	0.240748	0.999503	protein_coding	chr6	36196744-36232790	+	ENSG00000096070.19
XLOC_025357	XLOC_025357	BRSK1	31.0082	0.310082	chr19:55283996-55334043	TKS4_WT	TKS4_WT_T	12392.2	16234.8	0.389653	12392.2	16234.8	0.389657	0.362222	0.66525	0.177015	0.999503	protein_coding	chr19	55282072-55312562	+	ENSG00000160469.17
XLOC_007164	XLOC_007164	BRSK2	-61.9372	-0.619372	chr11:1389933-1469066	TKS4_WT	TKS4_WT_T	12341.3	4697.44	-1.39354	12341.3	4697.44	-1.39355	-1.01867	0.1146	0.940815	0.999503	protein_coding	chr11	1389899-1462689	+	ENSG00000174672.16
XLOC_033291	XLOC_033291	BRWD1	-23.7215	-0.237215	chr21:39184175-39323218	TKS4_WT	TKS4_WT_T	184318	140595	-0.390655	184318	140595	-0.390652	-0.418417	0.56535	0.247683	0.999503	protein_coding	chr21	39184176-39321559	-	ENSG00000185658.14
XLOC_057189	XLOC_057189	BRWD3	-42.1619	-0.421619	chrX:80669502-80809877	TKS4_WT	TKS4_WT_T	40861.3	23633.4	-0.789905	40861.3	23633.4	-0.789908	-0.789614	0.3483	0.458047	0.999503	protein_coding	chrX	80669503-80809877	-	ENSG00000165288.11
XLOC_009236	XLOC_009236	BSCL2,HNRNPUL2,HNRNPUL2-BSCL2	-12.8255	-0.128255	chr11:62690261-62727457	TKS4_WT	TKS4_WT_T	123722	107854	-0.198027	123722	107854	-0.198022	-0.206643	0.76835	0.114441	0.999503	protein_coding,protein_coding,protein_coding
XLOC_002919	XLOC_002919	BSDC1	30.4156	0.304156	chr1:32352719-32394441	TKS4_WT	TKS4_WT_T	45825.1	59763.1	0.383118	45825.1	59763.1	0.383117	0.407677	0.58935	0.229627	0.999503	protein_coding	chr1	32364633-32394731	-	ENSG00000160058.19
XLOC_024245	XLOC_024245	BSG	25.0488	0.250488	chr19:567432-583493	TKS4_WT	TKS4_WT_T	345071	431507	0.322491	345071	431507	0.322491	0.301277	0.67775	0.16893	0.999503	protein_coding	chr19	571277-583494	+	ENSG00000172270.22
XLOC_035124	XLOC_035124	BSN	-35.6862	-0.356862	chr3:49554476-49671549	TKS4_WT	TKS4_WT_T	4795.49	3084.16	-0.636801	4795.49	3084.16	-0.636801	-0.468172	0.4976	0.30312	0.999503	protein_coding	chr3	49554477-49671549	+	ENSG00000164061.5
XLOC_000771	XLOC_000771	BSND	-99.84	-0.9984	chr1:54998932-55017172	TKS4_WT	TKS4_WT_T	62.4884	0		62.4884	0.1	-9.28744	0	1	0	1	protein_coding	chr1	54998933-55017172	+	ENSG00000162399.9
XLOC_053982	XLOC_053982	BSPRY	-22.0393	-0.220393	chr9:113349540-113371233	TKS4_WT	TKS4_WT_T	14366.6	11200.3	-0.359176	14366.6	11200.3	-0.359181	-0.317562	0.65235	0.185519	0.999503	protein_coding	chr9	113349541-113371233	+	ENSG00000119411.11
XLOC_037987	XLOC_037987	BST1	78.1281	0.781281	chr4:15701865-15774178	TKS4_WT	TKS4_WT_T	425.678	758.252	0.832917	425.678	758.252	0.832915	0.501402	0.3389	0.469928	0.999503	protein_coding	chr4	15703065-15738313	+	ENSG00000109743.11
XLOC_025845	XLOC_025845	BST2	301.796	3.01796	chr19:17402938-17405630	TKS4_WT	TKS4_WT_T	230.849	927.541	2.00646	230.849	927.541	2.00646	1.05926	0.1655	0.781202	0.999503	protein_coding	chr19	17402939-17405630	-	ENSG00000130303.14
XLOC_005666	XLOC_005666	BTAF1	-8.77201	-0.0877201	chr10:91923769-92031437	TKS4_WT	TKS4_WT_T	168308	153544	-0.13245	168308	153544	-0.132452	-0.13065	0.87895	0.0560358	0.999503	protein_coding	chr10	91923770-92031437	+	ENSG00000095564.15
XLOC_017833	XLOC_017833	BTBD1	-8.78347	-0.0878347	chr15:83016422-83067258	TKS4_WT	TKS4_WT_T	183242	167147	-0.132635	183242	167147	-0.132633	-0.121573	0.862	0.0644927	0.999503	protein_coding	chr15	83016423-83067252	-	ENSG00000064726.10
XLOC_008800	XLOC_008800	BTBD10	8.54984	0.0854984	chr11:13387995-13463292	TKS4_WT	TKS4_WT_T	28959.6	31435.6	0.118357	28959.6	31435.6	0.118358	0.118862	0.8695	0.0607304	0.999503	protein_coding	chr11	13388008-13463297	-	ENSG00000148925.11
XLOC_011078	XLOC_011078	BTBD11	-4.7234	-0.047234	chr12:107316748-107659642	TKS4_WT	TKS4_WT_T	7651.05	7289.66	-0.0698069	7651.05	7289.66	-0.0698062	-0.0655486	0.9213	0.0355989	0.999503	protein_coding	chr12	107318421-107659642	+	ENSG00000151136.15
XLOC_005929	XLOC_005929	BTBD16	-41.9693	-0.419693	chr10:122270744-122338170	TKS4_WT	TKS4_WT_T	622.695	361.354	-0.785113	622.695	361.354	-0.785113	-0.465078	0.3113	0.506821	0.999503	protein_coding	chr10	122271296-122338159	+	ENSG00000138152.10
XLOC_022686	XLOC_022686	BTBD17	729.781	7.29781	chr17:74356415-74363655	TKS4_WT	TKS4_WT_T	84.1803	698.512	3.05273	84.1803	698.512	3.05273	1.20016	0.0536	1.27084	0.999503	protein_coding	chr17	74356416-74361868	-	ENSG00000204347.4
XLOC_009129	XLOC_009129	BTBD18	-56.7399	-0.567399	chr11:57712522-57819540	TKS4_WT	TKS4_WT_T	124.977	54.0652	-1.20889	124.977	54.0652	-1.20889	0	1	0	1	protein_coding	chr11	57743514-57752675	-	ENSG00000233436.8
XLOC_000645	XLOC_000645	BTBD19	-28.3971	-0.283971	chr1:44807441-44815585	TKS4_WT	TKS4_WT_T	7400.89	5299.25	-0.48191	7400.89	5299.25	-0.481911	-0.360854	0.584	0.233587	0.999503	protein_coding	chr1	44808523-44815585	+	ENSG00000222009.9
XLOC_025518	XLOC_025518	BTBD2	-49.8353	-0.498353	chr19:1985437-2015714	TKS4_WT	TKS4_WT_T	47251.2	23703.4	-0.995257	47251.2	23703.4	-0.995257	-0.981959	0.17865	0.747997	0.999503	protein_coding	chr19	1985438-2034881	-	ENSG00000133243.10
XLOC_031439	XLOC_031439	BTBD3	21.225	0.21225	chr20:11890722-11926595	TKS4_WT	TKS4_WT_T	36563.1	44323.6	0.277687	36563.1	44323.6	0.277687	0.302456	0.6633	0.17829	0.999503	protein_coding	chr20	11890723-11926609	+	ENSG00000132640.15
XLOC_015002	XLOC_015002	BTBD6	6.82237	0.0682237	chr14:105209285-105398147	TKS4_WT	TKS4_WT_T	36613.4	39111.3	0.0952136	36613.4	39111.3	0.0952137	0.0598731	0.93445	0.0294439	0.999503	protein_coding	chr14	105248533-105251093	+	ENSG00000184887.14
XLOC_015683	XLOC_015683	BTBD7	-0.679796	-0.00679796	chr14:93237549-93333036	TKS4_WT	TKS4_WT_T	70535.9	70056.4	-0.00984052	70535.9	70056.4	-0.00984087	-0.0103529	0.9879	0.00528701	0.999503	protein_coding	chr14	93237550-93333092	-	ENSG00000011114.15
XLOC_001023	XLOC_001023	BTBD8	23.8362	0.238362	chr1:92080344-92188509	TKS4_WT	TKS4_WT_T	6720.69	8322.65	0.308434	6720.69	8322.65	0.308434	0.276221	0.69425	0.158484	0.999503	protein_coding	chr1	92080305-92184725	+	ENSG00000189195.15
XLOC_045021	XLOC_045021	BTBD9	21.5677	0.215677	chr6:38168450-38664212	TKS4_WT	TKS4_WT_T	19876.5	24163.4	0.281762	19876.5	24163.4	0.28176	0.27521	0.7071	0.150519	0.999503	protein_coding	chr6	38168451-38640148	-	ENSG00000183826.18
XLOC_039492	XLOC_039492	BTC	-45.5574	-0.455574	chr4:74744758-74794718	TKS4_WT	TKS4_WT_T	3287.41	1789.75	-0.877195	3287.41	1789.75	-0.877193	-0.678248	0.3348	0.475215	0.999503	protein_coding	chr4	74744759-74794523	-	ENSG00000174808.12
XLOC_034834	XLOC_034834	BTD	41.9814	0.419814	chr3:15560698-15859814	TKS4_WT	TKS4_WT_T	8546.19	12134	0.505703	8546.19	12134	0.505702	0.107655	0.57055	0.243706	0.999503	protein_coding	chr3	15601341-15722311	+	ENSG00000169814.16
XLOC_040764	XLOC_040764	BTF3	-0.5025	-0.005025	chr5:73498441-73505667	TKS4_WT	TKS4_WT_T	394030	392050	-0.00726884	394030	392050	-0.00726782	-0.00657936	0.99155	0.00368538	0.999503	protein_coding	chr5	73498408-73505667	+	ENSG00000145741.17
XLOC_000725	XLOC_000725	BTF3L4	-2.94558	-0.0294558	chr1:52056294-52090716	TKS4_WT	TKS4_WT_T	71055.7	68962.7	-0.0431336	71055.7	68962.7	-0.0431341	-0.0426029	0.9537	0.0205882	0.999503	protein_coding	chr1	52056199-52090716	+	ENSG00000134717.18
XLOC_012190	XLOC_012190	BTG1,LINC01619	5.97204	0.0597204	chr12:91984975-92145846	TKS4_WT	TKS4_WT_T	35818.6	37957.7	0.0836834	35818.6	37957.7	0.0836836	0.0845369	0.90185	0.0448657	0.999503	protein_coding,lncRNA
XLOC_010253	XLOC_010253	BTG1P1,KLRG1	-73.7785	-0.737785	chr12:8950043-9215657	TKS4_WT	TKS4_WT_T	1079.62	283.093	-1.93117	1079.62	283.093	-1.93118	-0.721242	0.06645	1.17751	0.999503	processed_pseudogene,protein_coding
XLOC_002038	XLOC_002038	BTG2	-5.37678	-0.0537678	chr1:203305518-203309602	TKS4_WT	TKS4_WT_T	32119.6	30392.6	-0.0797362	32119.6	30392.6	-0.0797338	-0.0696217	0.92245	0.0350572	0.999503	protein_coding	chr1	203305491-203309602	+	ENSG00000159388.6
XLOC_033112	XLOC_033112	BTG3	45.856	0.45856	chr21:17512905-17636213	TKS4_WT	TKS4_WT_T	49236.3	71814.1	0.544544	49236.3	71814.1	0.544545	0.425214	0.52455	0.280213	0.999503	protein_coding	chr21	17593653-17612945	-	ENSG00000154640.15
XLOC_009711	XLOC_009711	BTG4	26932.6	269.326	chr11:111383827-111514734	TKS4_WT	TKS4_WT_T	0	27.0326		0.1	27.0326	8.07856	0	1	0	1	protein_coding	chr11	111467526-111514367	-	ENSG00000137707.14
XLOC_057271	XLOC_057271	BTK	-58.1003	-0.581003	chrX:101349446-101390796	TKS4_WT	TKS4_WT_T	329.358	138	-1.25498	329.358	138	-1.25499	0	1	0	1	protein_coding	chrX	101349338-101390796	-	ENSG00000010671.18
XLOC_036915	XLOC_036915	BTLA	-11.9573	-0.119573	chr3:112463029-112499757	TKS4_WT	TKS4_WT_T	403.986	355.68	-0.183726	403.986	355.68	-0.183725	-0.0945582	0.84235	0.0745074	0.999503	protein_coding	chr3	112463966-112499472	-	ENSG00000186265.10
XLOC_043223	XLOC_043223	BTN1A1	271.622	2.71622	chr6:26486648-26527393	TKS4_WT	TKS4_WT_T	351.05	1304.58	1.89384	351.05	1304.58	1.89384	1.22331	0.085	1.07058	0.999503	protein_coding	chr6	26500303-26510425	+	ENSG00000124557.14
XLOC_043221	XLOC_043221	BTN2A1	-0.6169	-0.006169	chr6:26457954-26482509	TKS4_WT	TKS4_WT_T	10455.5	10391	-0.00892366	10455.5	10391	-0.00892755	-0.00833578	0.99155	0.00368538	0.999503	protein_coding	chr6	26457904-26476621	+	ENSG00000112763.17
XLOC_043217	XLOC_043217	BTN2A2	-13.3591	-0.133591	chr6:26382892-26394874	TKS4_WT	TKS4_WT_T	8485.68	7352.07	-0.20688	8485.68	7352.07	-0.20688	-0.169711	0.85325	0.0689237	0.999503	protein_coding	chr6	26383096-26394874	+	ENSG00000124508.17
XLOC_043218	XLOC_043218	BTN3A1	-15.9753	-0.159753	chr6:26402268-26415216	TKS4_WT	TKS4_WT_T	4498.57	3779.91	-0.251113	4498.57	3779.91	-0.251115	-0.20853	0.7558	0.121593	0.999503	protein_coding	chr6	26402237-26415208	+	ENSG00000026950.17
XLOC_043216	XLOC_043216	BTN3A2	-2.93477	-0.0293477	chr6:26365169-26378320	TKS4_WT	TKS4_WT_T	10552.8	10243.1	-0.0429645	10552.8	10243.1	-0.0429734	-0.041348	0.9516	0.0215456	0.999503	protein_coding	chr6	26365159-26378320	+	ENSG00000186470.14
XLOC_043220	XLOC_043220	BTN3A3	10.9819	0.109819	chr6:26440503-26453415	TKS4_WT	TKS4_WT_T	1507.48	1673.03	0.150318	1507.48	1673.03	0.150324	0.10668	0.8883	0.0514403	0.999503	protein_coding	chr6	26440472-26453415	+	ENSG00000111801.16
XLOC_041540	XLOC_041540	BTNL9	-2.32398	-0.0232398	chr5:181039871-181061525	TKS4_WT	TKS4_WT_T	6562.87	6410.35	-0.033925	6562.87	6410.35	-0.0339237	-0.0288943	0.9723	0.0121997	0.999503	protein_coding	chr5	181040225-181061521	+	ENSG00000165810.17
XLOC_005761	XLOC_005761	BTRC	-24.6557	-0.246557	chr10:101353807-101557321	TKS4_WT	TKS4_WT_T	52192.8	39324.3	-0.408429	52192.8	39324.3	-0.40843	-0.446992	0.53635	0.270552	0.999503	protein_coding	chr10	101354033-101557321	+	ENSG00000166167.18
XLOC_030372	XLOC_030372	BUB1	-17.363	-0.17363	chr2:110637527-110678063	TKS4_WT	TKS4_WT_T	171917	142067	-0.275141	171917	142067	-0.275141	-0.275767	0.68395	0.164976	0.999503	protein_coding	chr2	110637528-110678063	-	ENSG00000169679.15
XLOC_016521	XLOC_016521	BUB1B,BUB1B-PAK6,PAK6	-10.1615	-0.101615	chr15:40161068-40277487	TKS4_WT	TKS4_WT_T	147084	132138	-0.15459	147084	132138	-0.154595	-0.160928	0.83155	0.0801116	0.999503	protein_coding,protein_coding,protein_coding
XLOC_005944	XLOC_005944	BUB3	7.70475	0.0770475	chr10:123154243-123170467	TKS4_WT	TKS4_WT_T	333288	358967	0.107081	333288	358967	0.107082	0.0874505	0.90185	0.0448657	0.999503	protein_coding	chr10	123154402-123170467	+	ENSG00000154473.18
XLOC_009763	XLOC_009763	BUD13	-12.258	-0.12258	chr11:116748169-116772987	TKS4_WT	TKS4_WT_T	26492.9	23245.4	-0.188659	26492.9	23245.4	-0.188661	-0.194378	0.7833	0.106072	0.999503	protein_coding	chr11	116748170-116772987	-	ENSG00000137656.12
XLOC_048594	XLOC_048594	BUD23	53.0538	0.530538	chr7:73683570-73698212	TKS4_WT	TKS4_WT_T	53383	81704.7	0.614038	53383	81704.7	0.614039	0.590713	0.3963	0.401976	0.999503	protein_coding	chr7	73683025-73705161	+	ENSG00000071462.12
XLOC_048770	XLOC_048770	BUD31,MIR12119	32.8245	0.328245	chr7:99408640-99466167	TKS4_WT	TKS4_WT_T	57565	76460.4	0.409521	57565	76460.4	0.409521	0.200276	0.7695	0.113791	0.999503	protein_coding,-
XLOC_045426	XLOC_045426	BVES	8.02298	0.0802298	chr6:105096821-105137157	TKS4_WT	TKS4_WT_T	5107.33	5517.09	0.111338	5107.33	5517.09	0.111338	0.0981011	0.8844	0.0533513	0.999503	protein_coding	chr6	105096822-105137157	-	ENSG00000112276.14
XLOC_043617	XLOC_043617	BYSL	74.2344	0.742344	chr6:41921498-41933046	TKS4_WT	TKS4_WT_T	43762.6	76249.5	0.801029	43762.6	76249.5	0.801029	0.837268	0.22045	0.65669	0.999503	protein_coding	chr6	41921499-41933046	+	ENSG00000112578.10
XLOC_029036	XLOC_029036	BZW1	-8.29777	-0.0829777	chr2:200695722-200827338	TKS4_WT	TKS4_WT_T	717518	657980	-0.124972	717518	657980	-0.124971	-0.0914921	0.8951	0.0481284	0.999503	protein_coding	chr2	200810594-200827338	+	ENSG00000082153.18
XLOC_048130	XLOC_048130	BZW2	-28.6121	-0.286121	chr7:16646180-16706523	TKS4_WT	TKS4_WT_T	223587	159614	-0.486251	223587	159614	-0.486249	-0.409451	0.62025	0.207433	0.999503	protein_coding	chr7	16646131-16706523	+	ENSG00000136261.16
XLOC_007039	XLOC_007039	C10orf143	-8.93926	-0.0893926	chr10:130034489-130110848	TKS4_WT	TKS4_WT_T	31.2442	28.4512	-0.135099	31.2442	28.4512	-0.135099	0	1	0	1	protein_coding	chr10	130020025-130110830	-	ENSG00000237489.5
XLOC_005723	XLOC_005723	C10orf62	-56.7399	-0.567399	chr10:97584388-97612802	TKS4_WT	TKS4_WT_T	124.977	54.0652	-1.20889	124.977	54.0652	-1.20889	0	1	0	1	protein_coding	chr10	97589721-97590934	+	ENSG00000203942.5
XLOC_006943	XLOC_006943	C10orf82	169189	1691.89	chr10:116662210-117126586	TKS4_WT	TKS4_WT_T	0	169.289		0.1	169.289	10.7253		0.13755	0.861539	0.999503	protein_coding	chr10	116663696-116670264	-	ENSG00000165863.17
XLOC_006989	XLOC_006989	C10orf88	8.02092	0.0802092	chr10:122930900-122954353	TKS4_WT	TKS4_WT_T	28205	30467.3	0.111313	28205	30467.3	0.111311	0.109652	0.873	0.0589858	0.999503	protein_coding	chr10	122930901-122954311	-	ENSG00000119965.13
XLOC_007025	XLOC_007025	C10orf90	28351.2	283.512	chr10:126413868-126670693	TKS4_WT	TKS4_WT_T	0	28.4512		0.1	28.4512	8.15235	0	1	0	1	protein_coding	chr10	126424997-126798708	-	ENSG00000154493.20
XLOC_006858	XLOC_006858	C10orf95	33.664	0.33664	chr10:102449816-102456293	TKS4_WT	TKS4_WT_T	1353.85	1809.61	0.418609	1353.85	1809.61	0.418611	0.139152	0.844	0.0736576	0.999503	protein_coding	chr10	102449837-102451543	-	ENSG00000120055.7
XLOC_008296	XLOC_008296	C11orf1	23.584	0.23584	chr11:111879477-111885975	TKS4_WT	TKS4_WT_T	17070.5	21096.4	0.305491	17070.5	21096.4	0.305492	0.257966	0.73115	0.135994	0.999503	protein_coding	chr11	111878935-111885975	+	ENSG00000137720.8
XLOC_008603	XLOC_008603	C11orf21	-99.6222	-0.996222	chr11:2295627-2318204	TKS4_WT	TKS4_WT_T	26.468	0		26.468	0.1	-8.04811	0	1	0	1	protein_coding	chr11	2295628-2303049	-	ENSG00000110665.12
XLOC_009385	XLOC_009385	C11orf24	-9.29582	-0.0929582	chr11:68261337-68271973	TKS4_WT	TKS4_WT_T	26042.9	23622	-0.140762	26042.9	23622	-0.140759	-0.151895	0.83425	0.0787038	0.999503	protein_coding	chr11	68261338-68272001	-	ENSG00000171067.11
XLOC_007265	XLOC_007265	C11orf42	82.1213	0.821213	chr11:6201904-6234663	TKS4_WT	TKS4_WT_T	93.7326	170.707	0.864901	93.7326	170.707	0.864899	0	1	0	1	protein_coding	chr11	6205557-6211135	+	ENSG00000180878.3
XLOC_009915	XLOC_009915	C11orf45	-26.8556	-0.268556	chr11:128891355-128921163	TKS4_WT	TKS4_WT_T	2738.54	2003.09	-0.451181	2738.54	2003.09	-0.45118	-0.304731	0.65355	0.184721	0.999503	protein_coding	chr11	128899565-128906044	-	ENSG00000174370.12
XLOC_007556	XLOC_007556	C11orf49	25.0884	0.250884	chr11:46936523-47176880	TKS4_WT	TKS4_WT_T	11426.4	14293.1	0.32295	11426.4	14293.1	0.322948	0.132513	0.73455	0.133979	0.999503	protein_coding	chr11	46936689-47164385	+	ENSG00000149179.14
XLOC_008297	XLOC_008297	C11orf52,HSPB2,HSPB2-C11orf52	36.9838	0.369838	chr11:111908563-111926871	TKS4_WT	TKS4_WT_T	594.038	813.736	0.454005	594.038	813.736	0.454006	0.308162	0.64165	0.192702	0.999503	protein_coding,protein_coding,protein_coding
XLOC_008178	XLOC_008178	C11orf54	-21.1419	-0.211419	chr11:93741671-93764749	TKS4_WT	TKS4_WT_T	26685.9	21044	-0.342668	26685.9	21044	-0.342669	-0.366909	0.6459	0.189835	0.999503	protein_coding	chr11	93741591-93764749	+	ENSG00000182919.15
XLOC_007361	XLOC_007361	C11orf58	14.4822	0.144822	chr11:16738646-16758340	TKS4_WT	TKS4_WT_T	119291	136567	0.19512	119291	136567	0.195124	0.203487	0.77865	0.108658	0.999503	protein_coding	chr11	16613132-16758340	+	ENSG00000110696.10
XLOC_009689	XLOC_009689	C11orf65	78.6627	0.786627	chr11:108155279-108469832	TKS4_WT	TKS4_WT_T	603.59	1078.39	0.837234	603.59	1078.39	0.837238	0.0620109	0.39825	0.399844	0.999503	protein_coding	chr11	108308519-108467531	-	ENSG00000166323.13
XLOC_009325	XLOC_009325	C11orf68	138.141	1.38141	chr11:65916809-65919062	TKS4_WT	TKS4_WT_T	28534.3	67952	1.25182	28534.3	67952	1.25182	1.30176	0.08875	1.05183	0.999503	protein_coding	chr11	65916810-65919062	-	ENSG00000175573.7
XLOC_009745	XLOC_009745	C11orf71	3.51881	0.0351881	chr11:114391442-114400511	TKS4_WT	TKS4_WT_T	3008.4	3114.26	0.0498954	3008.4	3114.26	0.049893	0.0397318	0.95655	0.0192923	0.999503	protein_coding	chr11	114391443-114400511	-	ENSG00000180425.11
XLOC_007906	XLOC_007906	C11orf80,RCE1	20.6359	0.206359	chr11:66744735-66846552	TKS4_WT	TKS4_WT_T	30868.5	37238.5	0.270661	30868.5	37238.5	0.27066	0.272538	0.7223	0.141282	0.999503	protein_coding,protein_coding
XLOC_007910	XLOC_007910	C11orf86	94.7359	0.947359	chr11:66975303-66977009	TKS4_WT	TKS4_WT_T	115.424	224.772	0.961516	115.424	224.772	0.961519	0.425775	0.469	0.328827	0.999503	protein_coding	chr11	66975277-66977009	+	ENSG00000173237.5
XLOC_008275	XLOC_008275	C11orf87	23.4641	0.234641	chr11:109422189-109433003	TKS4_WT	TKS4_WT_T	137.116	169.289	0.304084	137.116	169.289	0.304091	0.116032	0.7977	0.0981604	0.999503	protein_coding	chr11	109422190-109429167	+	ENSG00000185742.7
XLOC_008935	XLOC_008935	C11orf91,CD59	42.472	0.42472	chr11:33698107-33736479	TKS4_WT	TKS4_WT_T	99291.1	141462	0.510675	99291.1	141462	0.510678	0.529693	0.47825	0.320345	0.999503	protein_coding,protein_coding
XLOC_007524	XLOC_007524	C11orf96	-99.8111	-0.998111	chr11:43942636-43943878	TKS4_WT	TKS4_WT_T	52.9361	0		52.9361	0.1	-9.04811	0	1	0	1	protein_coding	chr11	43925342-43943878	+	ENSG00000187479.8
XLOC_009233	XLOC_009233	C11orf98,LBHD1	7.07708	0.0707708	chr11:62662816-62673686	TKS4_WT	TKS4_WT_T	40776.7	43662.5	0.0986505	40776.7	43662.5	0.0986497	0.0728398	0.9194	0.0364955	0.999503	protein_coding,protein_coding
XLOC_010911	XLOC_010911	C12orf29	-11.102	-0.11102	chr12:88035535-88142216	TKS4_WT	TKS4_WT_T	45729.6	40652.7	-0.169778	45729.6	40652.7	-0.169777	-0.112449	0.87485	0.0580664	0.999503	protein_coding	chr12	88033846-88050160	+	ENSG00000133641.18
XLOC_011393	XLOC_011393	C12orf4	13.2733	0.132733	chr12:4487729-4538508	TKS4_WT	TKS4_WT_T	33254	37667.9	0.179808	33254	37667.9	0.179808	0.163429	0.8153	0.0886826	0.999503	protein_coding	chr12	4487735-4538508	-	ENSG00000047621.12
XLOC_012453	XLOC_012453	C12orf43	3.83976	0.0383976	chr12:120977682-121016487	TKS4_WT	TKS4_WT_T	16969.8	17621.4	0.054359	16969.8	17621.4	0.054359	0.0534374	0.9401	0.0268259	0.999503	protein_coding	chr12	121000486-121016502	-	ENSG00000157895.11
XLOC_012168	XLOC_012168	C12orf50	55383.8	553.838	chr12:87980034-88030212	TKS4_WT	TKS4_WT_T	0	55.4838		0.1	55.4838	9.11592	0	1	0	1	protein_coding	chr12	87980035-88034037	-	ENSG00000165805.10
XLOC_012034	XLOC_012034	C12orf56	-99.8267	-0.998267	chr12:64264761-64390758	TKS4_WT	TKS4_WT_T	57.7122	0		57.7122	0.1	-9.17273	0	1	0	1	protein_coding	chr12	64264762-64390758	-	ENSG00000185306.13
XLOC_010207	XLOC_010207	C12orf57	-1.6707	-0.016707	chr12:6943432-6946003	TKS4_WT	TKS4_WT_T	74729.2	73480.7	-0.0243078	74729.2	73480.7	-0.0243067	-0.0236395	0.9731	0.0118425	0.999503	protein_coding	chr12	6942978-6946003	+	ENSG00000111678.11
XLOC_010324	XLOC_010324	C12orf60,PLBD1-AS1	89.9806	0.899806	chr12:14503660-14824415	TKS4_WT	TKS4_WT_T	3345.92	6356.6	0.925853	3345.92	6356.6	0.925852	0.197504	0.3613	0.442132	0.999503	protein_coding,lncRNA
XLOC_012285	XLOC_012285	C12orf73	21.1825	0.211825	chr12:103950193-103965755	TKS4_WT	TKS4_WT_T	8577.23	10394.1	0.277187	8577.23	10394.1	0.277181	0.24512	0.73125	0.135934	0.999503	protein_coding	chr12	103940763-103965708	-	ENSG00000204954.10
XLOC_011063	XLOC_011063	C12orf75	-51.8148	-0.518148	chr12:105330690-105371518	TKS4_WT	TKS4_WT_T	56907.5	27421	-1.05334	56907.5	27421	-1.05334	-1.08599	0.12915	0.888906	0.999503	protein_coding	chr12	105235290-105396097	+	ENSG00000235162.9
XLOC_012338	XLOC_012338	C12orf76	15.199	0.15199	chr12:110041176-110073639	TKS4_WT	TKS4_WT_T	1924.01	2216.44	0.204127	1924.01	2216.44	0.204128	0.1472	0.82255	0.0848377	0.999503	protein_coding	chr12	110027028-110073636	-	ENSG00000174456.16
XLOC_014066	XLOC_014066	C13orf46	-87.6199	-0.876199	chr13:113953704-113975026	TKS4_WT	TKS4_WT_T	1149.07	142.256	-3.01391	1149.07	142.256	-3.01391	-2.27834	0.19165	0.717491	0.999503	protein_coding	chr13	113953705-113974076	-	ENSG00000283199.3
XLOC_014224	XLOC_014224	C14orf119	20.6132	0.206132	chr14:23057659-23104989	TKS4_WT	TKS4_WT_T	55846.8	67358.6	0.270388	55846.8	67358.6	0.270388	0.160022	0.86985	0.0605556	0.999503	protein_coding	chr14	23095505-23100456	+	ENSG00000179933.6
XLOC_014793	XLOC_014793	C14orf132	-20.7502	-0.207502	chr14:96039361-96093971	TKS4_WT	TKS4_WT_T	5471.52	4336.17	-0.33552	5471.52	4336.17	-0.33552	-0.2817	0.6661	0.176461	0.999503	protein_coding	chr14	96039362-96093971	+	ENSG00000227051.7
XLOC_014379	XLOC_014379	C14orf28	-61.3688	-0.613688	chr14:44897274-44911917	TKS4_WT	TKS4_WT_T	2474.66	955.992	-1.37216	2474.66	955.992	-1.37216	-1.03223	0.14	0.853872	0.999503	protein_coding	chr14	44897275-44907257	+	ENSG00000179476.8
XLOC_015415	XLOC_015415	C14orf39	28351.2	283.512	chr14:60435953-60499774	TKS4_WT	TKS4_WT_T	0	28.4512		0.1	28.4512	8.15235	0	1	0	1	protein_coding	chr14	60396469-60515543	-	ENSG00000179008.9
XLOC_015133	XLOC_015133	C14orf93	-5.21622	-0.0521622	chr14:22982693-23010144	TKS4_WT	TKS4_WT_T	10205.1	9672.78	-0.0772897	10205.1	9672.78	-0.0772878	-0.0734989	0.9272	0.0328266	0.999503	protein_coding	chr14	22985894-23010166	-	ENSG00000100802.15
XLOC_016855	XLOC_016855	C15orf39	18.4266	0.184266	chr15:75201881-75212169	TKS4_WT	TKS4_WT_T	30626.9	36270.4	0.243994	30626.9	36270.4	0.243993	0.218697	0.7594	0.119529	0.999503	protein_coding	chr15	75195643-75212169	+	ENSG00000167173.19
XLOC_017832	XLOC_017832	C15orf40	-30.2627	-0.302627	chr15:82986209-83012298	TKS4_WT	TKS4_WT_T	17568.8	12252	-0.52	17568.8	12252	-0.519998	-0.301457	0.63505	0.197192	0.999503	protein_coding	chr15	82988441-83011641	-	ENSG00000169609.14
XLOC_016605	XLOC_016605	C15orf48,MIR147B	56802.4	568.024	chr15:45430609-45433340	TKS4_WT	TKS4_WT_T	0	56.9024		0.1	56.9024	9.15235	0	1	0	1	protein_coding,miRNA
XLOC_016779	XLOC_016779	C15orf61	-14.0089	-0.140089	chr15:67200666-67530146	TKS4_WT	TKS4_WT_T	9029.78	7764.81	-0.217739	9029.78	7764.81	-0.21774	-0.0664081	0.92075	0.0358583	0.999503	protein_coding	chr15	67521131-67530146	+	ENSG00000189227.6
XLOC_016535	XLOC_016535	C15orf62	-54.8478	-0.548478	chr15:40764067-40815084	TKS4_WT	TKS4_WT_T	374.93	169.289	-1.14714	374.93	169.289	-1.14713	-0.15841	0.70105	0.154251	0.999503	protein_coding	chr15	40769980-40772449	+	ENSG00000188277.10
XLOC_016681	XLOC_016681	C15orf65	-15.8191	-0.158191	chr15:55317183-55508234	TKS4_WT	TKS4_WT_T	579.71	488.005	-0.248433	579.71	488.005	-0.248435	-0.0346906	0.9067	0.0425364	0.999503	protein_coding	chr15	55408495-55418798	+	ENSG00000261652.3
XLOC_020185	XLOC_020185	C16orf46	-14.1993	-0.141993	chr16:81053496-81077254	TKS4_WT	TKS4_WT_T	4269.51	3663.27	-0.220938	4269.51	3663.27	-0.220938	-0.176486	0.8114	0.090765	0.999503	protein_coding	chr16	81053497-81077267	-	ENSG00000166455.14
XLOC_018577	XLOC_018577	C16orf72	-1.28964	-0.0128964	chr16:9091376-9121635	TKS4_WT	TKS4_WT_T	138876	137085	-0.0187238	138876	137085	-0.0187266	-0.0193179	0.97715	0.0100388	0.999503	protein_coding	chr16	9091644-9121635	+	ENSG00000182831.12
XLOC_020224	XLOC_020224	C16orf74	-71.5441	-0.715441	chr16:85707516-85751096	TKS4_WT	TKS4_WT_T	7814.23	2223.61	-1.8132	7814.23	2223.61	-1.8132	-1.62345	0.03195	1.49553	0.999503	protein_coding	chr16	85690084-85751129	-	ENSG00000154102.11
XLOC_019122	XLOC_019122	C16orf86	-39.2928	-0.392928	chr16:67662944-67670523	TKS4_WT	TKS4_WT_T	93.7326	56.9024	-0.720061	93.7326	56.9024	-0.720061	0	1	0	1	protein_coding	chr16	67666814-67668757	+	ENSG00000159761.15
XLOC_019881	XLOC_019881	C16orf87	-17.5711	-0.175711	chr16:46796602-46831471	TKS4_WT	TKS4_WT_T	11311.6	9324.03	-0.278776	11311.6	9324.03	-0.278777	-0.281729	0.67045	0.173634	0.999503	protein_coding	chr16	46796603-46831180	-	ENSG00000155330.10
XLOC_019404	XLOC_019404	C16orf91	146.727	1.46727	chr16:1419751-1420747	TKS4_WT	TKS4_WT_T	10435.4	25746.9	1.30292	10435.4	25746.9	1.30291	1.30004	0.05735	1.24147	0.999503	protein_coding	chr16	1419752-1420756	-	ENSG00000174109.5
XLOC_020243	XLOC_020243	C16orf95	19.2704	0.192704	chr16:87302797-87317392	TKS4_WT	TKS4_WT_T	2981.93	3556.56	0.254234	2981.93	3556.56	0.254236	0.193796	0.7962	0.0989778	0.999503	protein_coding	chr16	87083562-87317420	-	ENSG00000260456.7
XLOC_018549	XLOC_018549	C16orf96	-99.84	-0.9984	chr16:4510668-4600758	TKS4_WT	TKS4_WT_T	62.4884	0		62.4884	0.1	-9.28744	0	1	0	1	protein_coding	chr16	4556340-4600758	+	ENSG00000205832.8
XLOC_020594	XLOC_020594	C17orf100	-82.1626	-0.821626	chr17:6651761-6653476	TKS4_WT	TKS4_WT_T	630.058	112.386	-2.48702	630.058	112.386	-2.48702	-1.28944	0.1366	0.864549	0.999503	protein_coding	chr17	6651762-6693202	+	ENSG00000256806.6
XLOC_020571	XLOC_020571	C17orf107	-77.6332	-0.776332	chr17:4833339-4905019	TKS4_WT	TKS4_WT_T	1761.81	394.061	-2.16057	1761.81	394.061	-2.16057	-0.252153	0.2969	0.52739	0.999503	protein_coding	chr17	4899418-4902934	+	ENSG00000205710.4
XLOC_022283	XLOC_022283	C17orf113	40.1697	0.401697	chr17:41966794-42098473	TKS4_WT	TKS4_WT_T	1817.74	2547.92	0.487177	1817.74	2547.92	0.487174	0.0626593	0.78015	0.107822	0.999503	protein_coding	chr17	42038232-42050601	-	ENSG00000267221.3
XLOC_020602	XLOC_020602	C17orf49,RNASEK,RNASEK-C17orf49	-37.3779	-0.373779	chr17:7012416-7019654	TKS4_WT	TKS4_WT_T	28047.3	17563.8	-0.675261	28047.3	17563.8	-0.675257	-0.70227	0.3577	0.446481	0.999503	protein_coding,protein_coding,protein_coding
XLOC_022639	XLOC_022639	C17orf58	-13.9902	-0.139902	chr17:67991098-67996469	TKS4_WT	TKS4_WT_T	27942.5	24033.3	-0.217425	27942.5	24033.3	-0.217426	-0.229163	0.75065	0.124563	0.999503	protein_coding	chr17	67991099-67996469	-	ENSG00000186665.10
XLOC_022504	XLOC_022504	C17orf67	-39.7277	-0.397277	chr17:56791912-56833920	TKS4_WT	TKS4_WT_T	644.387	388.387	-0.730434	644.387	388.387	-0.730432	-0.473719	0.4991	0.301812	0.999503	protein_coding	chr17	56791913-56838773	-	ENSG00000214226.9
XLOC_022082	XLOC_022082	C17orf75	-0.492004	-0.00492004	chr17:32328440-32350049	TKS4_WT	TKS4_WT_T	9829.19	9780.83	-0.00711553	9829.19	9780.83	-0.00711564	-0.00710199	0.99155	0.00368538	0.999503	protein_coding	chr17	32324565-32350023	-	ENSG00000108666.10
XLOC_021482	XLOC_021482	C17orf80	8.30535	0.0830535	chr17:73232432-73263778	TKS4_WT	TKS4_WT_T	50593.9	54795.9	0.115104	50593.9	54795.9	0.115104	0.124761	0.86145	0.0647699	0.999503	protein_coding	chr17	73232233-73248959	+	ENSG00000141219.16
XLOC_020507	XLOC_020507	C17orf97	-18.1731	-0.181731	chr17:404534-414666	TKS4_WT	TKS4_WT_T	1010.16	826.583	-0.289358	1010.16	826.583	-0.289352	-0.200031	0.78735	0.103832	0.999503	protein_coding	chr17	410325-431062	+	ENSG00000187624.9
XLOC_022176	XLOC_022176	C17orf98	-99.8741	-0.998741	chr17:38835085-38841438	TKS4_WT	TKS4_WT_T	79.4041	0		79.4041	0.1	-9.63307	0	1	0	1	protein_coding	chr17	38835086-38841438	-	ENSG00000275489.2
XLOC_023450	XLOC_023450	C18orf21	-16.7728	-0.167728	chr18:35951835-35979287	TKS4_WT	TKS4_WT_T	23486.3	19547	-0.264872	23486.3	19547	-0.264872	-0.239124	0.7336	0.134541	0.999503	protein_coding	chr18	35972625-35979286	+	ENSG00000141428.17
XLOC_023489	XLOC_023489	C18orf25	0.200073	0.00200073	chr18:46173552-46266992	TKS4_WT	TKS4_WT_T	79970.7	80130.7	0.00288496	79970.7	80130.7	0.00288356	0.00321694	0.9963	0.00160987	0.999503	protein_coding	chr18	46173553-46266992	+	ENSG00000152242.11
XLOC_023533	XLOC_023533	C18orf54	27.0645	0.270645	chr18:54357905-54382035	TKS4_WT	TKS4_WT_T	30265.5	38456.7	0.345559	30265.5	38456.7	0.345561	0.35589	0.6284	0.201764	0.999503	protein_coding	chr18	54357906-54385218	+	ENSG00000166845.15
XLOC_025979	XLOC_025979	C19orf12	-0.801639	-0.00801639	chr19:29698885-29715789	TKS4_WT	TKS4_WT_T	16740.7	16606.5	-0.0116127	16740.7	16606.5	-0.0116118	-0.0116579	0.98895	0.00482567	0.999503	protein_coding	chr19	29698937-29715789	-	ENSG00000131943.20
XLOC_025502	XLOC_025502	C19orf25	15.785	0.15785	chr19:1446267-1479215	TKS4_WT	TKS4_WT_T	39309.4	45514.4	0.211447	39309.4	45514.4	0.211449	0.217823	0.76535	0.11614	0.999503	protein_coding	chr19	1461143-1479219	-	ENSG00000119559.17
XLOC_024910	XLOC_024910	C19orf33	-27.1699	-0.271699	chr19:38303557-38315976	TKS4_WT	TKS4_WT_T	43218.1	31475.8	-0.457394	43218.1	31475.8	-0.457393	-0.305874	0.7483	0.125924	0.999503	protein_coding	chr19	38304164-38305006	+	ENSG00000167644.12
XLOC_024458	XLOC_024458	C19orf38	-64.1691	-0.641691	chr19:10836557-10869796	TKS4_WT	TKS4_WT_T	158.808	56.9024	-1.48073	158.808	56.9024	-1.48072	0	1	0	1	protein_coding	chr19	10836575-10869790	+	ENSG00000214212.9
XLOC_024594	XLOC_024594	C19orf44	9.74396	0.0974396	chr19:16496381-16542437	TKS4_WT	TKS4_WT_T	7325.67	8039.48	0.134141	7325.67	8039.48	0.134141	0.0507653	0.92585	0.0334594	0.999503	protein_coding	chr19	16496394-16521352	+	ENSG00000105072.9
XLOC_026130	XLOC_026130	C19orf47	-32.9339	-0.329339	chr19:40292742-40378485	TKS4_WT	TKS4_WT_T	21439.3	14378.5	-0.576345	21439.3	14378.5	-0.576345	-0.345884	0.6205	0.207258	0.999503	protein_coding	chr19	40319536-40348527	-	ENSG00000160392.14
XLOC_024536	XLOC_024536	C19orf53	41.193	0.41193	chr19:13774455-13778773	TKS4_WT	TKS4_WT_T	36512.8	51553.5	0.497668	36512.8	51553.5	0.497668	0.431777	0.5221	0.282246	0.999503	protein_coding	chr19	13774456-13778773	+	ENSG00000104979.9
XLOC_026140	XLOC_026140	C19orf54	43.5666	0.435666	chr19:40717111-40765389	TKS4_WT	TKS4_WT_T	7995.73	11479.2	0.521715	7995.73	11479.2	0.52172	0.181409	0.5945	0.225848	0.999503	protein_coding	chr19	40740856-40751553	-	ENSG00000188493.15
XLOC_025779	XLOC_025779	C19orf67	-28.338	-0.28338	chr19:14080641-14086153	TKS4_WT	TKS4_WT_T	158.808	113.805	-0.480725	158.808	113.805	-0.48072	0	1	0	1	protein_coding	chr19	14081624-14085875	-	ENSG00000188032.10
XLOC_024320	XLOC_024320	C19orf71	-69.6464	-0.696464	chr19:3506262-3557592	TKS4_WT	TKS4_WT_T	93.7326	28.4512	-1.72006	93.7326	28.4512	-1.72006	0	1	0	1	protein_coding	chr19	3539171-3544030	+	ENSG00000183397.6
XLOC_026342	XLOC_026342	C19orf73	14.9859	0.149859	chr19:49114338-49119143	TKS4_WT	TKS4_WT_T	433.041	497.936	0.201455	433.041	497.936	0.201457	0.0682623	0.91925	0.0365664	0.999503	protein_coding	chr19	49118402-49119143	-	ENSG00000221916.4
XLOC_025196	XLOC_025196	C19orf81	16.5376	0.165376	chr19:50649444-50719802	TKS4_WT	TKS4_WT_T	2114.46	2464.14	0.220798	2114.46	2464.14	0.220795	0.0939543	0.89685	0.0472802	0.999503	protein_coding	chr19	50649445-50659310	+	ENSG00000235034.7
XLOC_026541	XLOC_026541	C19orf85	-69.6464	-0.696464	chr19:55463000-55464751	TKS4_WT	TKS4_WT_T	187.465	56.9024	-1.72006	187.465	56.9024	-1.72006	0	1	0	1	protein_coding	chr19	55463001-55464751	-	ENSG00000283567.2
XLOC_029948	XLOC_029948	C1D	21.6844	0.216844	chr2:68041129-68063004	TKS4_WT	TKS4_WT_T	14934.7	18173.2	0.283143	14934.7	18173.2	0.283144	0.271895	0.7049	0.151872	0.999503	protein_coding	chr2	68041130-68110948	-	ENSG00000197223.12
XLOC_048079	XLOC_048079	C1GALT1	-19.0269	-0.190269	chr7:7182543-7248616	TKS4_WT	TKS4_WT_T	58104.1	47048.7	-0.304485	58104.1	47048.7	-0.304485	-0.301412	0.67295	0.172017	0.999503	protein_coding	chr7	7156934-7248616	+	ENSG00000106392.11
XLOC_057419	XLOC_057419	C1GALT1C1	63.7299	0.637299	chrX:120625673-120630054	TKS4_WT	TKS4_WT_T	23034.4	37714.2	0.711319	23034.4	37714.2	0.711318	0.697981	0.30965	0.509129	0.999503	protein_coding	chrX	120625674-120630054	-	ENSG00000171155.8
XLOC_029770	XLOC_029770	C1GALT1C1L	7.74128	0.0774128	chr2:43637259-43767987	TKS4_WT	TKS4_WT_T	579.71	624.587	0.107572	579.71	624.587	0.107571	0.0249422	0.92985	0.0315871	0.999503	protein_coding	chr2	43675151-43676429	-	ENSG00000223658.8
XLOC_001813	XLOC_001813	C1orf105,DNM3,MIR3120	-31.8245	-0.318245	chr1:171841494-172468829	TKS4_WT	TKS4_WT_T	10640.7	7254.35	-0.552681	10640.7	7254.35	-0.552675	-0.374393	0.579	0.237321	0.999503	protein_coding,protein_coding,miRNA
XLOC_002983	XLOC_002983	C1orf109	36.9302	0.369302	chr1:37681569-37692336	TKS4_WT	TKS4_WT_T	47131.4	64537.1	0.45344	47131.4	64537.1	0.45344	0.464642	0.52355	0.281042	0.999503	protein_coding	chr1	37681570-37692249	-	ENSG00000116922.15
XLOC_001786	XLOC_001786	C1orf112	-26.4761	-0.264761	chr1:169792523-169894267	TKS4_WT	TKS4_WT_T	31225.5	22958.2	-0.443718	31225.5	22958.2	-0.443715	-0.336533	0.63525	0.197055	0.999503	protein_coding	chr1	169662007-169854080	+	ENSG00000000460.17
XLOC_002193	XLOC_002193	C1orf115	13.3792	0.133792	chr1:220690362-220699153	TKS4_WT	TKS4_WT_T	17409.8	19739.1	0.181155	17409.8	19739.1	0.181157	0.181879	0.7902	0.102263	0.999503	protein_coding	chr1	220690363-220699153	+	ENSG00000162817.7
XLOC_004525	XLOC_004525	C1orf116	34.0684	0.340684	chr1:207018520-207032761	TKS4_WT	TKS4_WT_T	7733.44	10368.1	0.422964	7733.44	10368.1	0.422969	0.397419	0.56355	0.249068	0.999503	protein_coding	chr1	207018522-207032756	-	ENSG00000182795.13
XLOC_000532	XLOC_000532	C1orf122	8.29982	0.0829982	chr1:37802944-37809454	TKS4_WT	TKS4_WT_T	33617.6	36407.8	0.11503	33617.6	36407.8	0.115031	0.0599885	0.91485	0.0386501	0.999503	protein_coding	chr1	37806979-37809454	+	ENSG00000197982.14
XLOC_004776	XLOC_004776	C1orf131	20.8407	0.208407	chr1:231223764-231241175	TKS4_WT	TKS4_WT_T	21935.4	26506.9	0.273106	21935.4	26506.9	0.273107	0.218155	0.7542	0.122513	0.999503	protein_coding	chr1	231223763-231241187	-	ENSG00000143633.13
XLOC_002507	XLOC_002507	C1orf159	-34.7079	-0.347079	chr1:1081822-1116089	TKS4_WT	TKS4_WT_T	11700.5	7639.5	-0.615014	11700.5	7639.5	-0.61502	-0.513445	0.4919	0.308123	0.999503	protein_coding	chr1	1081818-1116361	-	ENSG00000131591.18
XLOC_000173	XLOC_000173	C1orf167	138.279	1.38279	chr1:11761378-11806103	TKS4_WT	TKS4_WT_T	440.006	1048.44	1.25265	440.006	1048.44	1.25265	0.205753	0.30475	0.516056	0.999503	protein_coding	chr1	11761787-11789585	+	ENSG00000215910.8
XLOC_002566	XLOC_002566	C1orf174	-23.1024	-0.231024	chr1:3889132-3900293	TKS4_WT	TKS4_WT_T	25531.5	19633.1	-0.378992	25531.5	19633.1	-0.37899	-0.385406	0.5928	0.227092	0.999503	protein_coding	chr1	3889125-3900293	-	ENSG00000198912.12
XLOC_004771	XLOC_004771	C1orf198	30.3093	0.303093	chr1:230837118-230869591	TKS4_WT	TKS4_WT_T	49393.7	64364.6	0.381939	49393.7	64364.6	0.38194	0.402708	0.5547	0.255942	0.999503	protein_coding	chr1	230837119-230869589	-	ENSG00000119280.17
XLOC_001913	XLOC_001913	C1orf21	-34.1147	-0.341147	chr1:184387028-184638004	TKS4_WT	TKS4_WT_T	9269.98	6107.55	-0.601971	9269.98	6107.55	-0.601972	-0.54369	0.4387	0.357832	0.999503	protein_coding	chr1	184387029-184629019	+	ENSG00000116667.15
XLOC_003055	XLOC_003055	C1orf210	-46.757	-0.46757	chr1:43281876-43285840	TKS4_WT	TKS4_WT_T	2276.45	1212.05	-0.909332	2276.45	1212.05	-0.909337	-0.601488	0.3913	0.40749	0.999503	protein_coding	chr1	43281877-43285617	-	ENSG00000253313.6
XLOC_002957	XLOC_002957	C1orf216	53.5386	0.535386	chr1:35713876-35718884	TKS4_WT	TKS4_WT_T	16547.5	25406.8	0.618601	16547.5	25406.8	0.618601	0.605811	0.38085	0.419246	0.999503	protein_coding	chr1	35713877-35718894	-	ENSG00000142686.8
XLOC_001711	XLOC_001711	C1orf226	15.6518	0.156518	chr1:162378840-162386812	TKS4_WT	TKS4_WT_T	7604.28	8794.49	0.209789	7604.28	8794.49	0.209788	0.180897	0.7857	0.104743	0.999503	protein_coding	chr1	162378841-162386812	+	ENSG00000239887.6
XLOC_004712	XLOC_004712	C1orf35	-14.4187	-0.144187	chr1:228100730-228103325	TKS4_WT	TKS4_WT_T	8436.13	7219.75	-0.224633	8436.13	7219.75	-0.224632	-0.197051	0.7713	0.112777	0.999503	protein_coding	chr1	228100726-228105411	-	ENSG00000143793.13
XLOC_003962	XLOC_003962	C1orf43	21.8638	0.218638	chr1:154206719-154271510	TKS4_WT	TKS4_WT_T	97079.7	118305	0.285275	97079.7	118305	0.285269	0.216149	0.79825	0.0978611	0.999503	protein_coding	chr1	154206696-154220637	-	ENSG00000143612.21
XLOC_000600	XLOC_000600	C1orf50	-9.53165	-0.0953165	chr1:42767248-42784895	TKS4_WT	TKS4_WT_T	7298.21	6602.57	-0.144515	7298.21	6602.57	-0.144515	-0.122304	0.86005	0.0654763	0.999503	protein_coding	chr1	42767245-42779491	+	ENSG00000164008.17
XLOC_003380	XLOC_003380	C1orf52	21.177	0.21177	chr1:85249952-85259677	TKS4_WT	TKS4_WT_T	36521.3	44255.4	0.277116	36521.3	44255.4	0.277115	0.2819	0.69525	0.157859	0.999503	protein_coding	chr1	85249953-85259672	-	ENSG00000162642.14
XLOC_001976	XLOC_001976	C1orf53	-27.4954	-0.274954	chr1:197902629-197907362	TKS4_WT	TKS4_WT_T	1585.5	1149.56	-0.463858	1585.5	1149.56	-0.463856	-0.265736	0.7026	0.153292	0.999503	protein_coding	chr1	197902630-197907367	+	ENSG00000203724.11
XLOC_001435	XLOC_001435	C1orf54	35.0858	0.350858	chr1:150257257-150282179	TKS4_WT	TKS4_WT_T	288.561	389.805	0.433876	288.561	389.805	0.433876	0.0311115	0.7386	0.131591	0.999503	protein_coding	chr1	150268200-150280916	+	ENSG00000118292.9
XLOC_004544	XLOC_004544	C1orf74	40.9454	0.409454	chr1:209756052-209784559	TKS4_WT	TKS4_WT_T	15650.6	22058.8	0.495136	15650.6	22058.8	0.495136	0.493974	0.4775	0.321027	0.999503	protein_coding	chr1	209779208-209784559	-	ENSG00000162757.4
XLOC_003231	XLOC_003231	C1orf87	7.49282	0.0749282	chr1:59990393-60073770	TKS4_WT	TKS4_WT_T	26.468	28.4512	0.104237	26.468	28.4512	0.10424	0	1	0	1	protein_coding	chr1	59987269-60073770	-	ENSG00000162598.13
XLOC_021749	XLOC_021749	C1QBP	12.7247	0.127247	chr17:5420166-5439155	TKS4_WT	TKS4_WT_T	581147	655096	0.172803	581147	655096	0.172803	0.127448	0.85745	0.0667912	0.999503	protein_coding	chr17	5432777-5448830	-	ENSG00000108561.8
XLOC_022370	XLOC_022370	C1QL1	-68.1436	-0.681436	chr17:44959692-44968303	TKS4_WT	TKS4_WT_T	2639.24	840.768	-1.65034	2639.24	840.768	-1.65034	-1.14756	0.1022	0.990549	0.999503	protein_coding	chr17	44959693-44968303	-	ENSG00000131094.4
XLOC_006189	XLOC_006189	C1QL3	201.805	2.01805	chr10:16436942-16521879	TKS4_WT	TKS4_WT_T	120.201	362.773	1.59362	120.201	362.773	1.59362	0.112192	0.4876	0.311936	0.999503	protein_coding	chr10	16513734-16521879	-	ENSG00000165985.10
XLOC_011810	XLOC_011810	C1QL4	10.4665	0.104665	chr12:49332408-49337195	TKS4_WT	TKS4_WT_T	8307.97	9177.52	0.143608	8307.97	9177.52	0.143608	0.13526	0.85845	0.066285	0.999503	protein_coding	chr12	49332409-49337188	-	ENSG00000186897.5
XLOC_021582	XLOC_021582	C1QTNF1	23.837	0.23837	chr17:79019208-79049788	TKS4_WT	TKS4_WT_T	2267.69	2808.24	0.308439	2267.69	2808.24	0.308443	0.252076	0.7476	0.126331	0.999503	protein_coding	chr17	79022814-79049788	+	ENSG00000173918.15
XLOC_002512	XLOC_002512	C1QTNF12	111.281	1.11281	chr1:1242447-1247218	TKS4_WT	TKS4_WT_T	156.221	330.066	1.07917	156.221	330.066	1.07917	0.90003	0.4241	0.372532	0.999503	protein_coding	chr1	1242446-1246722	-	ENSG00000184163.3
XLOC_042621	XLOC_042621	C1QTNF2	170.22	1.7022	chr5:160347557-160370656	TKS4_WT	TKS4_WT_T	283.785	766.843	1.43413	283.785	766.843	1.43413	0.817061	0.23685	0.625527	0.999503	protein_coding	chr5	160347754-160370641	-	ENSG00000145861.9
XLOC_009022	XLOC_009022	C1QTNF4	16.4296	0.164296	chr11:47589663-47596336	TKS4_WT	TKS4_WT_T	218.709	254.642	0.219457	218.709	254.642	0.219458	0.136584	0.86815	0.0614052	0.999503	protein_coding	chr11	47589667-47594411	-	ENSG00000172247.4
XLOC_009806	XLOC_009806	C1QTNF5,MFRP	112286	1122.86	chr11:119338941-119346705	TKS4_WT	TKS4_WT_T	0	112.386		0.1	112.386	10.1342		0.02355	1.62801	0.999503	protein_coding,protein_coding
XLOC_034266	XLOC_034266	C1QTNF6	20.7432	0.207432	chr22:37180165-37199423	TKS4_WT	TKS4_WT_T	8184.98	9882.81	0.271942	8184.98	9882.81	0.271942	0.207823	0.7778	0.109132	0.999503	protein_coding	chr22	37180166-37199385	-	ENSG00000133466.14
XLOC_037983	XLOC_037983	C1QTNF7	53965.2	539.652	chr4:15002425-15446169	TKS4_WT	TKS4_WT_T	0	54.0652		0.1	54.0652	9.07856	0	1	0	1	protein_coding	chr4	15339818-15446167	+	ENSG00000163145.13
XLOC_019395	XLOC_019395	C1QTNF8	90.363	0.90363	chr16:1088225-1096306	TKS4_WT	TKS4_WT_T	949.864	1808.19	0.928752	949.864	1808.19	0.928753	0.739064	0.2986	0.52491	0.999503	protein_coding	chr16	1088226-1096244	-	ENSG00000184471.9
XLOC_012797	XLOC_012797	C1QTNF9	-99.6799	-0.996799	chr13:24307165-24322531	TKS4_WT	TKS4_WT_T	31.2442	0		31.2442	0.1	-8.28744	0	1	0	1	protein_coding	chr13	24307166-24322535	+	ENSG00000240654.6
XLOC_013455	XLOC_013455	C1QTNF9B	56802.4	568.024	chr13:23715142-23897502	TKS4_WT	TKS4_WT_T	0	56.9024		0.1	56.9024	9.15235	0	1	0	1	protein_coding	chr13	23891099-23897502	-	ENSG00000205863.11
XLOC_011435	XLOC_011435	C1R	27.1945	0.271945	chr12:7080218-7092445	TKS4_WT	TKS4_WT_T	1334.35	1697.22	0.347041	1334.35	1697.22	0.347036	0.261059	0.69375	0.158797	0.999503	protein_coding	chr12	7080214-7092540	-	ENSG00000159403.18
XLOC_011436	XLOC_011436	C1RL	-42.2663	-0.422663	chr12:7094553-7130272	TKS4_WT	TKS4_WT_T	9371.27	5410.38	-0.792515	9371.27	5410.38	-0.792515	-0.583713	0.4466	0.350081	0.999503	protein_coding	chr12	7089587-7109238	-	ENSG00000139178.12
XLOC_010215	XLOC_010215	C1S	36.7532	0.367532	chr12:7060717-7071032	TKS4_WT	TKS4_WT_T	617.919	845.024	0.451575	617.919	845.024	0.451575	0.302635	0.6079	0.216168	0.999503	protein_coding	chr12	6988259-7071032	+	ENSG00000182326.16
XLOC_043469	XLOC_043469	C2	30.6428	0.306428	chr6:31897782-31945672	TKS4_WT	TKS4_WT_T	173.137	226.191	0.38563	173.137	226.191	0.385627	0.0935647	0.8445	0.0734003	0.999503	protein_coding	chr6	31897785-31945673	+	ENSG00000166278.16
XLOC_031632	XLOC_031632	C20orf144	-1.40317	-0.0140317	chr20:33657086-33674428	TKS4_WT	TKS4_WT_T	57.7122	56.9024	-0.020388	57.7122	56.9024	-0.0203868	-0.00150742	0.80385	0.094825	0.999503	protein_coding	chr20	33662327-33665619	+	ENSG00000149609.6
XLOC_031347	XLOC_031347	C20orf202	-63.5757	-0.635757	chr20:1203453-1208279	TKS4_WT	TKS4_WT_T	156.221	56.9024	-1.45703	156.221	56.9024	-1.45703	0	1	0	1	protein_coding	chr20	1203454-1209076	+	ENSG00000215595.3
XLOC_032296	XLOC_032296	C20orf203	-69.6464	-0.696464	chr20:32631624-32673941	TKS4_WT	TKS4_WT_T	93.7326	28.4512	-1.72006	93.7326	28.4512	-1.72006	0	1	0	1	protein_coding	chr20	32631625-32673941	-	ENSG00000198547.10
XLOC_031985	XLOC_031985	C20orf204	-28.8275	-0.288275	chr20:64033708-64039001	TKS4_WT	TKS4_WT_T	913.445	650.122	-0.490608	913.445	650.122	-0.490607	-0.255817	0.73245	0.135222	0.999503	protein_coding	chr20	64034344-64039962	+	ENSG00000196421.9
XLOC_032050	XLOC_032050	C20orf27	0.87263	0.0087263	chr20:3753498-3768388	TKS4_WT	TKS4_WT_T	58249.2	58757.5	0.0125356	58249.2	58757.5	0.0125348	0.0130387	0.9858	0.00621119	0.999503	protein_coding	chr20	3753508-3767781	-	ENSG00000101220.18
XLOC_031992	XLOC_031992	C20orf96	-20.7684	-0.207684	chr20:270862-290757	TKS4_WT	TKS4_WT_T	4501.55	3566.65	-0.335855	4501.55	3566.65	-0.335852	-0.293898	0.67275	0.172146	0.999503	protein_coding	chr20	270863-290778	-	ENSG00000196476.12
XLOC_033403	XLOC_033403	C21orf58	18.1037	0.181037	chr21:46229230-46324046	TKS4_WT	TKS4_WT_T	9533.06	11258.9	0.240051	9533.06	11258.9	0.240055	0.0781673	0.8828	0.0541377	0.999503	protein_coding	chr21	46300181-46323875	-	ENSG00000160298.18
XLOC_033230	XLOC_033230	C21orf62	85253.6	852.536	chr21:32772099-32813808	TKS4_WT	TKS4_WT_T	0	85.3536		0.1	85.3536	9.73731	0	1	0	1	protein_coding	chr21	32790673-32813743	-	ENSG00000205929.11
XLOC_033114	XLOC_033114	C21orf91,C21orf91-OT1	17.7718	0.177718	chr21:17777403-18267371	TKS4_WT	TKS4_WT_T	26525.1	31239.1	0.235993	26525.1	31239.1	0.235995	0.241028	0.7277	0.138048	0.999503	protein_coding,lncRNA
XLOC_033592	XLOC_033592	C22orf15	112.475	1.12475	chr22:23762522-23767972	TKS4_WT	TKS4_WT_T	93.7326	199.158	1.08729	93.7326	199.158	1.08729	0	1	0	1	protein_coding	chr22	23762990-23765863	+	ENSG00000169314.15
XLOC_034281	XLOC_034281	C22orf23	-42.0727	-0.420727	chr22:37943049-38041915	TKS4_WT	TKS4_WT_T	923.396	534.898	-0.787684	923.396	534.898	-0.787686	-0.159387	0.60445	0.21864	0.999503	protein_coding	chr22	37943050-37953669	-	ENSG00000128346.11
XLOC_034007	XLOC_034007	C22orf39	1.21637	0.0121637	chr22:19440885-19479193	TKS4_WT	TKS4_WT_T	19155.3	19388.3	0.0174416	19155.3	19388.3	0.0174427	0.00947211	0.98805	0.00522108	0.999503	protein_coding	chr22	19351368-19447711	-	ENSG00000242259.9
XLOC_033313	XLOC_033313	C2CD2	-25.8848	-0.258848	chr21:41885109-41954018	TKS4_WT	TKS4_WT_T	46321.8	34331.5	-0.432161	46321.8	34331.5	-0.432158	-0.461619	0.5189	0.284916	0.999503	protein_coding	chr21	41885112-41954018	-	ENSG00000157617.17
XLOC_008379	XLOC_008379	C2CD2L	0.907731	0.00907731	chr11:119106749-119118544	TKS4_WT	TKS4_WT_T	14101.1	14229.1	0.0130431	14101.1	14229.1	0.0130367	0.0119826	0.98815	0.00517713	0.999503	protein_coding	chr11	119102198-119118544	+	ENSG00000172375.14
XLOC_009452	XLOC_009452	C2CD3	-28.0514	-0.280514	chr11:74012577-74254703	TKS4_WT	TKS4_WT_T	43702.3	31443.2	-0.474959	43702.3	31443.2	-0.474961	-0.300214	0.6771	0.169347	0.999503	protein_coding	chr11	74012718-74171210	-	ENSG00000168014.18
XLOC_016735	XLOC_016735	C2CD4A	439.555	4.39555	chr15:62066976-62070917	TKS4_WT	TKS4_WT_T	62.4884	337.159	2.43177	62.4884	337.159	2.43177	1.58588	0.16085	0.793579	0.999503	protein_coding	chr15	62066977-62070917	+	ENSG00000198535.5
XLOC_025477	XLOC_025477	C2CD4C	56.6439	0.566439	chr19:405434-409147	TKS4_WT	TKS4_WT_T	8799.32	13783.6	0.647491	8799.32	13783.6	0.647489	0.552787	0.46015	0.337101	0.999503	protein_coding	chr19	405445-409147	-	ENSG00000183186.8
XLOC_003895	XLOC_003895	C2CD4D	-99.6799	-0.996799	chr1:151837817-151853712	TKS4_WT	TKS4_WT_T	31.2442	0		31.2442	0.1	-8.28744	0	1	0	1	protein_coding	chr1	151837818-151840557	-	ENSG00000225556.2
XLOC_011614	XLOC_011614	C2CD5	-8.1127	-0.081127	chr12:22448545-22544542	TKS4_WT	TKS4_WT_T	33932	31179.2	-0.122062	33932	31179.2	-0.122063	-0.122091	0.86475	0.0631094	0.999503	protein_coding	chr12	22448583-22544546	-	ENSG00000111731.13
XLOC_030989	XLOC_030989	C2CD6	-99.8812	-0.998812	chr2:201487420-201619182	TKS4_WT	TKS4_WT_T	84.1803	0		84.1803	0.1	-9.71734	0	1	0	1	protein_coding	chr2	201487421-201619178	-	ENSG00000155754.15
XLOC_028350	XLOC_028350	C2orf15	-71.4165	-0.714165	chr2:98997260-99154966	TKS4_WT	TKS4_WT_T	856.131	244.712	-1.80675	856.131	244.712	-1.80675	-0.484781	0.44135	0.355217	0.999503	protein_coding	chr2	99141707-99151669	+	ENSG00000273045.7
XLOC_027806	XLOC_027806	C2orf16	57.4263	0.574263	chr2:27576521-27582722	TKS4_WT	TKS4_WT_T	120.201	189.228	0.654683	120.201	189.228	0.654677	0.390461	0.6716	0.172889	0.999503	protein_coding	chr2	27537386-27582720	+	ENSG00000221843.5
XLOC_029975	XLOC_029975	C2orf42	39.7318	0.397318	chr2:70149879-70191026	TKS4_WT	TKS4_WT_T	8121.7	11348.6	0.482665	8121.7	11348.6	0.482661	0.439721	0.5568	0.254301	0.999503	protein_coding	chr2	70149885-70248615	-	ENSG00000115998.8
XLOC_028404	XLOC_028404	C2orf49	5.31391	0.0531391	chr2:105331541-105438529	TKS4_WT	TKS4_WT_T	33186.5	34950	0.0746941	33186.5	34950	0.074696	0.0399433	0.9578	0.0187252	0.999503	protein_coding	chr2	105337532-105349211	+	ENSG00000135974.10
XLOC_027674	XLOC_027674	C2orf50	-22.9883	-0.229883	chr2:11133127-11154564	TKS4_WT	TKS4_WT_T	1307.88	1007.22	-0.37685	1307.88	1007.22	-0.376851	-0.258608	0.7151	0.145633	0.999503	protein_coding	chr2	11133128-11151317	+	ENSG00000150873.12
XLOC_030948	XLOC_030948	C2orf66	-60.0526	-0.600526	chr2:196804416-196809355	TKS4_WT	TKS4_WT_T	274.233	109.549	-1.32382	274.233	109.549	-1.32383	-0.593843	0.4338	0.36271	0.999503	protein_coding	chr2	196804417-196809355	-	ENSG00000187944.5
XLOC_030105	XLOC_030105	C2orf68	-32.3922	-0.323922	chr2:85602842-85649284	TKS4_WT	TKS4_WT_T	14161.6	9574.34	-0.564738	14161.6	9574.34	-0.564739	-0.181991	0.82495	0.0835724	0.999503	protein_coding	chr2	85605254-85612066	-	ENSG00000168887.11
XLOC_029029	XLOC_029029	C2orf69	-13.0104	-0.130104	chr2:199911292-199928273	TKS4_WT	TKS4_WT_T	47533.6	41349.3	-0.201085	47533.6	41349.3	-0.201085	-0.205515	0.7745	0.110979	0.999503	protein_coding	chr2	199911293-199955935	+	ENSG00000178074.6
XLOC_029304	XLOC_029304	C2orf72	19.356	0.19356	chr2:231037522-231172827	TKS4_WT	TKS4_WT_T	3507.91	4186.9	0.255271	3507.91	4186.9	0.255271	0.033432	0.89495	0.0482012	0.999503	protein_coding	chr2	231037523-231049719	+	ENSG00000204128.6
XLOC_027983	XLOC_027983	C2orf73	-99.6222	-0.996222	chr2:54329942-54383673	TKS4_WT	TKS4_WT_T	26.468	0		26.468	0.1	-8.04811	0	1	0	1	protein_coding	chr2	54330034-54383742	+	ENSG00000177994.16
XLOC_028024	XLOC_028024	C2orf74	-99.6799	-0.996799	chr2:61145115-61164828	TKS4_WT	TKS4_WT_T	31.2442	0		31.2442	0.1	-8.28744	0	1	0	1	protein_coding	chr2	61145068-61164828	+	ENSG00000237651.8
XLOC_030431	XLOC_030431	C2orf76	33.0924	0.330924	chr2:119281471-119372543	TKS4_WT	TKS4_WT_T	4271.5	5685.04	0.412427	4271.5	5685.04	0.412428	0.1008	0.8124	0.0902301	0.999503	protein_coding	chr2	119302225-119366834	-	ENSG00000186132.15
XLOC_028138	XLOC_028138	C2orf78	-68.3127	-0.683127	chr2:73784188-73817148	TKS4_WT	TKS4_WT_T	1216.73	385.549	-1.65803	1216.73	385.549	-1.65802	-1.12064	0.1267	0.897223	0.999503	protein_coding	chr2	73784189-73817147	+	ENSG00000187833.7
XLOC_030029	XLOC_030029	C2orf81,HMGA1P8	-39.2455	-0.392455	chr2:74414175-74421619	TKS4_WT	TKS4_WT_T	1992.66	1210.63	-0.718935	1992.66	1210.63	-0.718938	-0.452044	0.47135	0.326656	0.999503	protein_coding,processed_pseudogene
XLOC_028976	XLOC_028976	C2orf88	19.7446	0.197446	chr2:189673119-190203484	TKS4_WT	TKS4_WT_T	3348.11	4009.18	0.259961	3348.11	4009.18	0.25996	0.0467211	0.86645	0.0622565	0.999503	protein_coding	chr2	189879609-190203484	+	ENSG00000187699.10
XLOC_028337	XLOC_028337	C2orf92	-23.8575	-0.238575	chr2:97655938-97703066	TKS4_WT	TKS4_WT_T	293.337	223.354	-0.39323	293.337	223.354	-0.393227	-0.0516682	0.7881	0.103419	0.999503	protein_coding	chr2	97664217-97703066	+	ENSG00000228486.11
XLOC_025611	XLOC_025611	C3	36.1064	0.361064	chr19:6677703-6720650	TKS4_WT	TKS4_WT_T	995.038	1354.31	0.444733	995.038	1354.31	0.444734	0.264205	0.69305	0.159235	0.999503	protein_coding	chr19	6677704-6730562	-	ENSG00000125730.18
XLOC_035237	XLOC_035237	C3orf14	-59.1467	-0.591467	chr3:62319021-62336213	TKS4_WT	TKS4_WT_T	132.34	54.0652	-1.29148	132.34	54.0652	-1.29148	0	1	0	1	protein_coding	chr3	62319015-62336213	+	ENSG00000114405.11
XLOC_036584	XLOC_036584	C3orf18	-44.6987	-0.446987	chr3:50558024-50596166	TKS4_WT	TKS4_WT_T	10959.2	6060.58	-0.854609	10959.2	6060.58	-0.854615	-0.473924	0.49695	0.303687	0.999503	protein_coding	chr3	50558025-50571027	-	ENSG00000088543.15
XLOC_034825	XLOC_034825	C3orf20	-0.657264	-0.00657264	chr3:14673469-14773036	TKS4_WT	TKS4_WT_T	2461.72	2445.54	-0.00951453	2461.72	2445.54	-0.00951361	-0.00702799	0.9925	0.00326948	0.999503	protein_coding	chr3	14675141-14773036	+	ENSG00000131379.10
XLOC_037024	XLOC_037024	C3orf22	-99.9168	-0.999168	chr3:126524154-126558965	TKS4_WT	TKS4_WT_T	120.201	0		120.201	0.1	-10.2312		0.0091	2.04096	0.879338	protein_coding	chr3	126526999-126558965	-	ENSG00000180697.9
XLOC_037281	XLOC_037281	C3orf33	10.9816	0.109816	chr3:155762616-155806278	TKS4_WT	TKS4_WT_T	7865.98	8729.79	0.150321	7865.98	8729.79	0.15032	0.126223	0.8633	0.0638383	0.999503	protein_coding	chr3	155762617-155806278	-	ENSG00000174928.16
XLOC_035374	XLOC_035374	C3orf38	0.447401	0.00447401	chr3:88149958-88157966	TKS4_WT	TKS4_WT_T	30263.7	30399.1	0.00644144	30263.7	30399.1	0.00644023	0.00598996	0.9937	0.00274471	0.999503	protein_coding	chr3	88149959-88168729	+	ENSG00000179021.10
XLOC_035505	XLOC_035505	C3orf52,TBILA	-2.83425	-0.0283425	chr3:112086348-112136379	TKS4_WT	TKS4_WT_T	42614.5	41406.7	-0.0414816	42614.5	41406.7	-0.0414802	-0.0441466	0.95145	0.021614	0.999503	protein_coding,lncRNA
XLOC_036551	XLOC_036551	C3orf62,USP4	33.7294	0.337294	chr3:49268595-49340053	TKS4_WT	TKS4_WT_T	38155.1	51024.6	0.419315	38155.1	51024.6	0.419317	0.390933	0.6093	0.215169	0.999503	protein_coding,protein_coding
XLOC_037479	XLOC_037479	C3orf70	-99.8933	-0.998933	chr3:185076837-185153060	TKS4_WT	TKS4_WT_T	93.7326	0		93.7326	0.1	-9.87241	0	1	0	1	protein_coding	chr3	185076838-185153060	-	ENSG00000187068.3
XLOC_035885	XLOC_035885	C3orf80	58.9532	0.589532	chr3:160225421-160485747	TKS4_WT	TKS4_WT_T	1844.6	2932.05	0.6686	1844.6	2932.05	0.668602	0.0538349	0.7282	0.137749	0.999503	protein_coding	chr3	160225422-160228213	+	ENSG00000180044.6
XLOC_043473	XLOC_043473	C4A	112286	1122.86	chr6:31982056-32002681	TKS4_WT	TKS4_WT_T	0	112.386		0.1	112.386	10.1342		0.0071	2.14874	0.75283	protein_coding	chr6	31982052-32002681	+	ENSG00000244731.9
XLOC_043476	XLOC_043476	C4B	61.2389	0.612389	chr6:32014794-32035418	TKS4_WT	TKS4_WT_T	52.9361	85.3536	0.6892	52.9361	85.3536	0.6892	0.235721	0.1562	0.806319	0.999503	protein_coding	chr6	32014795-32035418	+	ENSG00000224389.9
XLOC_038076	XLOC_038076	C4orf19	-99.9295	-0.999295	chr4:37453453-37686403	TKS4_WT	TKS4_WT_T	141.893	0		141.893	0.1	-10.4706		0.07635	1.11719	0.999503	protein_coding	chr4	37453925-37623495	+	ENSG00000154274.15
XLOC_039780	XLOC_039780	C4orf3	14.8852	0.148852	chr4:119296418-119304445	TKS4_WT	TKS4_WT_T	17274.9	19846.3	0.200192	17274.9	19846.3	0.200193	0.198759	0.7853	0.104964	0.999503	protein_coding	chr4	119296419-119304445	-	ENSG00000164096.13
XLOC_038665	XLOC_038665	C4orf33	-21.8174	-0.218174	chr4:129093690-129116637	TKS4_WT	TKS4_WT_T	7399.11	5784.82	-0.35508	7399.11	5784.82	-0.35508	-0.288355	0.70075	0.154437	0.999503	protein_coding	chr4	129093317-129116640	+	ENSG00000151470.13
XLOC_039592	XLOC_039592	C4orf36	22.8722	0.228722	chr4:86876204-86897256	TKS4_WT	TKS4_WT_T	649.562	798.131	0.29716	649.562	798.131	0.297158	0.180682	0.721	0.142065	0.999503	protein_coding	chr4	86876205-86892422	-	ENSG00000163633.12
XLOC_040014	XLOC_040014	C4orf46	-25.0188	-0.250188	chr4:158666674-158672056	TKS4_WT	TKS4_WT_T	24647.5	18481	-0.415399	24647.5	18481	-0.415398	-0.41521	0.5553	0.255472	0.999503	protein_coding	chr4	158666675-158672255	-	ENSG00000205208.5
XLOC_038974	XLOC_038974	C4orf47	-34.0893	-0.340893	chr4:185151722-185472263	TKS4_WT	TKS4_WT_T	84.1803	55.4838	-0.601416	84.1803	55.4838	-0.601416	-0.0147107	0.7697	0.113679	0.999503	protein_coding	chr4	185426249-185449826	+	ENSG00000205129.9
XLOC_037833	XLOC_037833	C4orf48	11.5926	0.115926	chr4:1982716-2043970	TKS4_WT	TKS4_WT_T	12797	14280.5	0.158237	12797	14280.5	0.158241	0.0895466	0.92615	0.0333187	0.999503	protein_coding	chr4	2041995-2043964	+	ENSG00000243449.8
XLOC_039103	XLOC_039103	C4orf50	-8.93926	-0.0893926	chr4:5897590-6018762	TKS4_WT	TKS4_WT_T	31.2442	28.4512	-0.135099	31.2442	28.4512	-0.135099	0	1	0	1	protein_coding	chr4	5897373-6200555	-	ENSG00000181215.16
XLOC_038741	XLOC_038741	C4orf51	159.034	1.59034	chr4:145680099-145938823	TKS4_WT	TKS4_WT_T	367.965	953.155	1.37314	367.965	953.155	1.37314	0.177485	0.47655	0.321892	0.999503	protein_coding	chr4	145680146-145771032	+	ENSG00000237136.8
XLOC_039655	XLOC_039655	C4orf54	1926.29	19.2629	chr4:99636528-99657828	TKS4_WT	TKS4_WT_T	31.2442	633.099	4.34077	31.2442	633.099	4.34077	4.17452	0.15725	0.803409	0.999503	protein_coding	chr4	99636529-99657828	-	ENSG00000248713.2
XLOC_055169	XLOC_055169	C5,C5-OT1	80.171	0.80171	chr9:120942251-121074865	TKS4_WT	TKS4_WT_T	319.805	576.196	0.849366	319.805	576.196	0.849367	0.479021	0.41705	0.379812	0.999503	protein_coding,-
XLOC_025093	XLOC_025093	C5AR1	-46.6666	-0.466666	chr19:47309860-47322066	TKS4_WT	TKS4_WT_T	3379.55	1802.43	-0.906883	3379.55	1802.43	-0.906888	-0.662391	0.37975	0.420502	0.999503	protein_coding	chr19	47290023-47322066	+	ENSG00000197405.8
XLOC_025094	XLOC_025094	C5AR2	27.4848	0.274848	chr19:47331613-47347329	TKS4_WT	TKS4_WT_T	156.221	199.158	0.350328	156.221	199.158	0.350325	0	1	0	1	protein_coding	chr19	47332175-47347329	+	ENSG00000134830.6
XLOC_042386	XLOC_042386	C5orf15	-3.74613	-0.0374613	chr5:133955509-133968625	TKS4_WT	TKS4_WT_T	51613.3	49679.8	-0.0550837	51613.3	49679.8	-0.0550835	-0.0553766	0.9344	0.0294672	0.999503	protein_coding	chr5	133955510-133968674	-	ENSG00000113583.8
XLOC_040511	XLOC_040511	C5orf22	-8.22984	-0.0822984	chr5:31532274-31555058	TKS4_WT	TKS4_WT_T	40519.6	37184.9	-0.1239	40519.6	37184.9	-0.123903	-0.133398	0.87025	0.060356	0.999503	protein_coding	chr5	31532287-31555053	+	ENSG00000082213.18
XLOC_041135	XLOC_041135	C5orf24	-13.8079	-0.138079	chr5:134833602-134859735	TKS4_WT	TKS4_WT_T	63834.7	55020.5	-0.214373	63834.7	55020.5	-0.214372	-0.234704	0.752	0.123782	0.999503	protein_coding	chr5	134845680-134859735	+	ENSG00000181904.9
XLOC_041829	XLOC_041829	C5orf34	-10.8977	-0.108977	chr5:43444251-43519854	TKS4_WT	TKS4_WT_T	13415.7	11953.7	-0.166468	13415.7	11953.7	-0.166465	-0.108886	0.8912	0.0500248	0.999503	protein_coding	chr5	43486709-43515148	-	ENSG00000172244.9
XLOC_041438	XLOC_041438	C5orf47	7.49282	0.0749282	chr5:173989164-174007524	TKS4_WT	TKS4_WT_T	26.468	28.4512	0.104237	26.468	28.4512	0.10424	0	1	0	1	protein_coding	chr5	173973779-174006140	+	ENSG00000185056.10
XLOC_040579	XLOC_040579	C5orf51,FBXO4	-15.9732	-0.159732	chr5:41904312-42040230	TKS4_WT	TKS4_WT_T	60026.9	50438.7	-0.251078	60026.9	50438.7	-0.251078	-0.264678	0.696	0.157391	0.999503	protein_coding,protein_coding
XLOC_041330	XLOC_041330	C5orf52	26932.6	269.326	chr5:157625678-157680176	TKS4_WT	TKS4_WT_T	0	27.0326		0.1	27.0326	8.07856	0	1	0	1	protein_coding	chr5	157671533-157680158	+	ENSG00000187658.7
XLOC_042334	XLOC_042334	C5orf63	34.2157	0.342157	chr5:127042557-127073502	TKS4_WT	TKS4_WT_T	4280.26	5744.78	0.424554	4280.26	5744.78	0.424553	0.385491	0.58545	0.23251	0.999503	protein_coding	chr5	127045235-127073506	-	ENSG00000164241.14
XLOC_044431	XLOC_044431	C6orf120	54.5519	0.545519	chr6:169702111-169724500	TKS4_WT	TKS4_WT_T	31262.5	48316.8	0.62809	31262.5	48316.8	0.628092	0.504462	0.47735	0.321163	0.999503	protein_coding	chr6	169702190-169704856	+	ENSG00000185127.6
XLOC_045063	XLOC_045063	C6orf132	-39.7828	-0.397828	chr6:42101118-42142620	TKS4_WT	TKS4_WT_T	15811.6	9521.3	-0.731749	15811.6	9521.3	-0.731753	-0.525449	0.47135	0.326656	0.999503	protein_coding	chr6	42092233-42142620	-	ENSG00000188112.10
XLOC_043414	XLOC_043414	C6orf136	2.90596	0.0290596	chr6:30647132-30673006	TKS4_WT	TKS4_WT_T	7759.91	7985.41	0.0413272	7759.91	7985.41	0.0413266	0.0155538	0.97635	0.0103945	0.999503	protein_coding	chr6	30647039-30653210	+	ENSG00000204564.12
XLOC_043704	XLOC_043704	C6orf141	-27.838	-0.27838	chr6:49550643-49561916	TKS4_WT	TKS4_WT_T	10799.9	7793.42	-0.470695	10799.9	7793.42	-0.470689	-0.454411	0.439	0.357535	0.999503	protein_coding	chr6	49550666-49561907	+	ENSG00000197261.12
XLOC_043891	XLOC_043891	C6orf163	-66.1946	-0.661946	chr6:87344812-87365463	TKS4_WT	TKS4_WT_T	572.346	193.484	-1.56467	572.346	193.484	-1.56467	-0.825054	0.2918	0.534915	0.999503	protein_coding	chr6	87344813-87365463	+	ENSG00000203872.7
XLOC_045069	XLOC_045069	C6orf226	-9.10082	-0.0910082	chr6:42890264-42890821	TKS4_WT	TKS4_WT_T	704.288	640.192	-0.137662	704.288	640.192	-0.137661	-0.0799412	0.90745	0.0421773	0.999503	protein_coding	chr6	42890265-42890821	-	ENSG00000221821.4
XLOC_044543	XLOC_044543	C6orf52	74.0003	0.740003	chr6:10659563-10709782	TKS4_WT	TKS4_WT_T	1859.33	3235.24	0.799091	1859.33	3235.24	0.79909	0.141995	0.42785	0.368708	0.999503	protein_coding	chr6	10671418-10694797	-	ENSG00000137434.12
XLOC_044138	XLOC_044138	C6orf58	337.144	3.37144	chr6:127577173-127591820	TKS4_WT	TKS4_WT_T	31.2442	136.582	2.1281	31.2442	136.582	2.12811	1.33521	0.13485	0.870149	0.999503	protein_coding	chr6	127519455-127591820	+	ENSG00000184530.9
XLOC_044632	XLOC_044632	C6orf62	-26.8404	-0.268404	chr6:24667076-24720920	TKS4_WT	TKS4_WT_T	177121	129581	-0.450881	177121	129581	-0.450881	-0.433651	0.53905	0.268371	0.999503	protein_coding	chr6	24704861-24719998	-	ENSG00000112308.13
XLOC_043569	XLOC_043569	C6orf89	1.77806	0.0177806	chr6:36740772-36928964	TKS4_WT	TKS4_WT_T	73794	75106.1	0.0254249	73794	75106.1	0.0254266	0.0178497	0.9803	0.008641	0.999503	protein_coding	chr6	36871870-36928964	+	ENSG00000198663.17
XLOC_049649	XLOC_049649	C7orf25	-8.1852	-0.081852	chr7:42909272-42914356	TKS4_WT	TKS4_WT_T	11307	10381.5	-0.123199	11307	10381.5	-0.123201	-0.119675	0.862	0.0644927	0.999503	protein_coding	chr7	42909273-42912305	-	ENSG00000136197.14
XLOC_048070	XLOC_048070	C7orf26	57.906	0.57906	chr7:6590020-6608726	TKS4_WT	TKS4_WT_T	15663.5	24733.6	0.659068	15663.5	24733.6	0.659066	0.652093	0.33885	0.469993	0.999503	protein_coding	chr7	6590021-6608726	+	ENSG00000146576.13
XLOC_049517	XLOC_049517	C7orf31	-68.8086	-0.688086	chr7:25134691-25180354	TKS4_WT	TKS4_WT_T	1587.29	495.098	-1.68077	1587.29	495.098	-1.68078	-1.11474	0.0952	1.02136	0.999503	protein_coding	chr7	25134692-25180356	-	ENSG00000153790.12
XLOC_049352	XLOC_049352	C7orf50	-6.39404	-0.0639404	chr7:977963-1138325	TKS4_WT	TKS4_WT_T	31193.1	29198.6	-0.0953274	31193.1	29198.6	-0.0953277	-0.0950188	0.9036	0.0440238	0.999503	protein_coding	chr7	996986-1138260	-	ENSG00000146540.15
XLOC_048376	XLOC_048376	C7orf57	208.67	2.0867	chr7:47982434-48061297	TKS4_WT	TKS4_WT_T	88.9564	274.582	1.62607	88.9564	274.582	1.62607	0.249754	0.11255	0.948655	0.999503	protein_coding	chr7	48035511-48061304	+	ENSG00000164746.14
XLOC_050126	XLOC_050126	C7orf61	-47.0381	-0.470381	chr7:100456619-100464260	TKS4_WT	TKS4_WT_T	480.802	254.642	-0.916973	480.802	254.642	-0.916973	-0.452448	0.56755	0.245996	0.999503	protein_coding	chr7	100456620-100464260	-	ENSG00000185955.5
XLOC_054255	XLOC_054255	C8G	268.659	2.68659	chr9:136944869-136946981	TKS4_WT	TKS4_WT_T	387.07	1426.97	1.88229	387.07	1426.97	1.88229	1.10266	0.3168	0.499215	0.999503	protein_coding	chr9	136945185-136946975	+	ENSG00000176919.13
XLOC_051743	XLOC_051743	C8orf33	83.0674	0.830674	chr8:145052466-145065864	TKS4_WT	TKS4_WT_T	76351.1	139774	0.872375	76351.1	139774	0.872375	0.947391	0.1899	0.721475	0.999503	protein_coding	chr8	145052465-145066685	+	ENSG00000182307.14
XLOC_051250	XLOC_051250	C8orf44,C8orf44-SGK3,SGK3	-25.5626	-0.255626	chr8:66667595-66862022	TKS4_WT	TKS4_WT_T	31556.3	23489.7	-0.425895	31556.3	23489.7	-0.4259	-0.454675	0.4963	0.304256	0.999503	lncRNA,protein_coding,protein_coding
XLOC_050925	XLOC_050925	C8orf58	-12.0571	-0.120571	chr8:22599598-22669148	TKS4_WT	TKS4_WT_T	12094.1	10635.9	-0.185366	12094.1	10635.9	-0.185361	-0.057571	0.89655	0.0474255	0.999503	protein_coding	chr8	22599599-22604150	+	ENSG00000241852.11
XLOC_052668	XLOC_052668	C8orf76,ZHX1,ZHX1-C8orf76	12.6218	0.126218	chr8:123219966-123275541	TKS4_WT	TKS4_WT_T	80669.4	90851.3	0.171485	80669.4	90851.3	0.171486	0.169127	0.81205	0.0904172	0.999503	protein_coding,protein_coding,protein_coding
XLOC_052835	XLOC_052835	C8orf82,LRRC24	56.9527	0.569527	chr8:144517964-144529111	TKS4_WT	TKS4_WT_T	32622.7	51202.2	0.650327	32622.7	51202.2	0.65033	0.401215	0.57375	0.241277	0.999503	protein_coding,protein_coding
XLOC_052452	XLOC_052452	C8orf88	194.724	1.94724	chr8:90791767-90985393	TKS4_WT	TKS4_WT_T	120.201	354.261	1.55937	120.201	354.261	1.55936	0.584843	0.42415	0.372481	0.999503	protein_coding	chr8	90958471-90985238	-	ENSG00000253250.3
XLOC_055340	XLOC_055340	C9orf116	-33.8249	-0.338249	chr9:135495180-135499869	TKS4_WT	TKS4_WT_T	6288.65	4161.52	-0.595638	6288.65	4161.52	-0.59564	-0.441358	0.5163	0.287098	0.999503	protein_coding	chr9	135495181-135501734	-	ENSG00000160345.13
XLOC_053427	XLOC_053427	C9orf131	264.244	2.64244	chr9:35041094-35045991	TKS4_WT	TKS4_WT_T	31.2442	113.805	1.8649	31.2442	113.805	1.8649	0	1	0	1	protein_coding	chr9	35041095-35045986	+	ENSG00000174038.13
XLOC_055079	XLOC_055079	C9orf152	135063	1350.63	chr9:110199560-110208159	TKS4_WT	TKS4_WT_T	0	135.163		0.1	135.163	10.4005	0	1	0	1	protein_coding	chr9	110190048-110208159	-	ENSG00000188959.10
XLOC_054846	XLOC_054846	C9orf153	-26.0147	-0.260147	chr9:86220264-86259657	TKS4_WT	TKS4_WT_T	182.689	135.163	-0.434689	182.689	135.163	-0.434689	-0.26851	0.717	0.144481	0.999503	protein_coding	chr9	86220265-86259657	-	ENSG00000187753.13
XLOC_054522	XLOC_054522	C9orf24	-47.1796	-0.471796	chr9:34378462-34397942	TKS4_WT	TKS4_WT_T	312.442	165.033	-0.920835	312.442	165.033	-0.920834	-0.684881	0.71775	0.144027	0.999503	protein_coding	chr9	34379019-34397828	-	ENSG00000164972.14
XLOC_054783	XLOC_054783	C9orf40	17.4457	0.174457	chr9:74946582-74952912	TKS4_WT	TKS4_WT_T	11366.1	13349	0.231988	11366.1	13349	0.231994	0.229317	0.72825	0.13772	0.999503	protein_coding	chr9	74946583-74952912	-	ENSG00000135045.7
XLOC_053983	XLOC_053983	C9orf43	93.683	0.93683	chr9:113407234-113429690	TKS4_WT	TKS4_WT_T	411.349	796.713	0.953696	411.349	796.713	0.953697	0.0634739	0.3741	0.427012	0.999503	protein_coding	chr9	113410054-113429690	+	ENSG00000157653.12
XLOC_053771	XLOC_053771	C9orf47,S1PR3	28351.2	283.512	chr9:88990862-89005155	TKS4_WT	TKS4_WT_T	0	28.4512		0.1	28.4512	8.15235	0	1	0	1	-,protein_coding
XLOC_055277	XLOC_055277	C9orf50	-99.8933	-0.998933	chr9:129608871-129642151	TKS4_WT	TKS4_WT_T	93.7326	0		93.7326	0.1	-9.87241	0	1	0	1	protein_coding	chr9	129612225-129620776	-	ENSG00000179058.7
XLOC_054762	XLOC_054762	C9orf57	109449	1094.49	chr9:72030055-72090340	TKS4_WT	TKS4_WT_T	0	109.549		0.1	109.549	10.0974		0.1858	0.730954	0.999503	protein_coding	chr9	72051376-72072721	-	ENSG00000204669.11
XLOC_054462	XLOC_054462	C9orf72	16.3556	0.163556	chr9:27546545-27573866	TKS4_WT	TKS4_WT_T	17824.5	20739.8	0.21854	17824.5	20739.8	0.21854	0.223817	0.75415	0.122542	0.999503	protein_coding	chr9	27535640-27573866	-	ENSG00000147894.17
XLOC_055282	XLOC_055282	C9orf78	8.01328	0.0801328	chr9:129827289-129835307	TKS4_WT	TKS4_WT_T	37509	40514.7	0.111209	37509	40514.7	0.111209	0.112008	0.8658	0.0625824	0.999503	protein_coding	chr9	129827290-129835863	-	ENSG00000136819.15
XLOC_053653	XLOC_053653	C9orf85	-5.33514	-0.0533514	chr9:71911638-71986058	TKS4_WT	TKS4_WT_T	12239.6	11586.6	-0.0790985	12239.6	11586.6	-0.0790991	-0.0724633	0.9163	0.0379623	0.999503	protein_coding	chr9	71911510-71986054	+	ENSG00000155621.15
XLOC_052407	XLOC_052407	CA1	55383.8	553.838	chr8:85327607-85378113	TKS4_WT	TKS4_WT_T	0	55.4838		0.1	55.4838	9.11592		0.00115	2.9393	0.247895	protein_coding	chr8	85327608-85379014	-	ENSG00000133742.14
XLOC_026316	XLOC_026316	CA11	5.86178	0.0586178	chr19:48637945-48682245	TKS4_WT	TKS4_WT_T	5640.27	5970.89	0.082181	5640.27	5970.89	0.0821818	0.0513184	0.9378	0.0278898	0.999503	protein_coding	chr19	48637946-48646187	-	ENSG00000063180.9
XLOC_017586	XLOC_017586	CA12	54.431	0.54431	chr15:63321377-63381846	TKS4_WT	TKS4_WT_T	3618.56	5588.18	0.626964	3618.56	5588.18	0.626963	0.569806	0.4124	0.384681	0.999503	protein_coding	chr15	63321378-63381846	-	ENSG00000074410.14
XLOC_051362	XLOC_051362	CA13	20.4999	0.204999	chr8:85243665-85284073	TKS4_WT	TKS4_WT_T	16152.3	19463.5	0.269032	16152.3	19463.5	0.269032	0.271132	0.7018	0.153787	0.999503	protein_coding	chr8	85220587-85284073	+	ENSG00000185015.8
XLOC_001433	XLOC_001433	CA14	156.199	1.56199	chr1:150257257-150282179	TKS4_WT	TKS4_WT_T	262.093	671.48	1.35726	262.093	671.48	1.35727	0.105071	0.37115	0.430451	0.999503	protein_coding	chr1	150257251-150265078	+	ENSG00000118298.12
XLOC_051364	XLOC_051364	CA2	54.0835	0.540835	chr8:85438858-85481493	TKS4_WT	TKS4_WT_T	11082.3	17076	0.623707	11082.3	17076	0.623713	0.616025	0.3533	0.451856	0.999503	protein_coding	chr8	85463968-85481493	+	ENSG00000104267.10
XLOC_051363	XLOC_051363	CA3	-17.8362	-0.178362	chr8:85438858-85481493	TKS4_WT	TKS4_WT_T	173.137	142.256	-0.283422	173.137	142.256	-0.283425	-0.0490239	0.8631	0.0639389	0.999503	protein_coding	chr8	85373436-85449040	+	ENSG00000164879.7
XLOC_021356	XLOC_021356	CA4	-31.4379	-0.314379	chr17:60149941-60431426	TKS4_WT	TKS4_WT_T	408.762	280.256	-0.544514	408.762	280.256	-0.544516	-0.0379557	0.7262	0.138944	0.999503	protein_coding	chr17	60149942-60170899	+	ENSG00000167434.10
XLOC_020251	XLOC_020251	CA5A	-99.6799	-0.996799	chr16:87881548-87936575	TKS4_WT	TKS4_WT_T	31.2442	0		31.2442	0.1	-8.28744	0	1	0	1	protein_coding	chr16	87881546-87936580	-	ENSG00000174990.8
XLOC_052239	XLOC_052239	CA8	67.147	0.67147	chr8:60185411-60281400	TKS4_WT	TKS4_WT_T	903.893	1510.83	0.741118	903.893	1510.83	0.741117	0.499858	0.55035	0.259361	0.999503	protein_coding	chr8	60185412-60281400	-	ENSG00000178538.10
XLOC_053439	XLOC_053439	CA9	71.751	0.71751	chr9:35673808-35681159	TKS4_WT	TKS4_WT_T	245.177	421.094	0.780315	245.177	421.094	0.780319	0.446841	0.69995	0.154933	0.999503	protein_coding	chr9	35673928-35681159	+	ENSG00000107159.14
[truncated: 13,657 more rows]

## Sheet: B (KO_WT)
test_id	gene_id	gene	%	FC	locus	sample_1	sample_2	value_1	value_2	log2(fold_change)	value_1_corrected	value_2_corrected	log2(fold_change)_corrected	test_stat	p_value	-log10(p_value)	q_value	type	chr_name	chr_location	chain	ENSG_id
[truncated: 15,376 more rows]

[truncated: 2 more sheets: C (KO-T_KO), D (KO-T_WT)]
