# Supplementary material for: Morphological Changes Induced by TKS4 Deficiency Can Be Reversed by EZH2 Inhibition in Colorectal Carcinoma Cells
Source: Biomolecules. 2024 Apr 5;14(4):445. doi: 10.3390/biom14040445 (PMC11047920; doi:10.3390/biom14040445)
Supplement: Supplementary file 1 [file biomolecules-14-00445-s001.zip › Supplementary Table S4.xlsx]

## Sheet: A
No.	Antibodies	WB	IFS	ChIP	Co-IP	Cat#	Provider
1	Rabbit Anti -H3K27me3	1:1000	1:200	3ug	—	MA5-11198	ThermoFisher
2	Rabbit Anti -Tks4	1:2500	1:4000	—	3ug	09-267	Sigma Aldrich
3	Rabbit Anti -EZH2	1:500	—	—	—	07-689	Merck
4	Rabbit Anti -Mono-Methyl Lysine	1:1000	—	—	—	14679	Cell signaling
5	Rabbit Anti-Histone H3	1:4000	—	—	—	PA5-16183	ThermoFisher
6	Rabbit Anti-GAPDH	1:2000	—	—	—	PA1-16777	ThermoFisher
7	Rabbit Anti-RNA Polymerase II	—	—	3ug	—	26157	ThermoFisher
8	Normal Rabbit IgG	—	—	3ug	3ug	26157	ThermoFisher
9	Rabbit Anti-MMP14	1:1000	—	—	—	PA5-13183	ThermoFisher
10	Goat Anti-Mouse Alexa Fluor™ 633	—	6:1000	—	—	A21052	ThermoFisher
11	Goat Anti-Rabbit Alexa Fluor™ 546	—	4:1000	—	—	A-11035	ThermoFisher
12	Goat Anti-Rabbit Alexa Fluor™ 488	—	3.4:1000	—	—	A11008	ThermoFisher
13	Goat Anti-Rat Alexa Fluor Plus 405	—	2.6:1000	—	—	A48261	ThermoFisher
14	Goat Anti-Rabbit-HRP	1:10000	—	—	—	A27036	ThermoFisher
15	Sheep Anti-Rabbit-HRP	1:10000	—	—	—	AP510P	Sigma Aldrich
16	Goat Anti-Mouse-HRP	1:5000	—	—	—	31431	ThermoFisher

## Sheet: B
No.	Name	Catalog no.	Provider	Organism
1	ACTB	Hs01060665_g1	Thermofisher	Human
2	AKT3	Hs00987343_m1	Thermofisher	Human
3	CCND1	Hs00765553_m1	Thermofisher	Human
4	CDH1	Hs01023895_m1	Thermofisher	Human
5	CDK6	Hs01026371_m1	Thermofisher	Human
6	EZH2	Hs00544830_m1	Thermofisher	Human
7	FN1	Hs01549976_m1	Thermofisher	Human
8	GAPDH	Hs02786624_g1	Thermofisher	Human
9	HOTAIR	Hs03296631_m1	Thermofisher	Human
10	HOXB7	Hs04187556_m1	Thermofisher	Human
11	LINC01234	Hs05034146_s1	Thermofisher	Human
12	LINC01405	Hs00858490_g1	Thermofisher	Human
13	MALAT-1	Hs00273907_s1	Thermofisher	Human
14	mir4435-2HG	Hs03680374_m1	Thermofisher	Human
15	MKI67	Hs04260396_g1	Thermofisher	Human
16	MMP14	Hs01037003_g1	Thermofisher	Human
17	NEAT1	Hs01008264_s1	Thermofisher	Human
18	OCLN	Hs05465837_g1	Thermofisher	Human
19	PLAU	Hs01547054_m1	Thermofisher	Human
20	RPL13A	Hs04194366_g1	Thermofisher	Human
21	SLC2A1	Hs00892681_m1	Thermofisher	Human
22	TERC	Hs03297287_s1	Thermofisher	Human
23	TJP1	Hs01551871_m1	Thermofisher	Human
24	VIM	Hs00958111_m1	Thermofisher	Human
25	ZCRB1	Hs01091917_g1	Thermofisher	Human
